# Supplementary material for: Intricate Interactions between Fine-Scale Genetic Structure, Lifestyle, and Dietary Habits in the Japanese Population
Source: Research Square preprint supplement (doi:10.21203/rs.3.rs-4526751/v1), 2024-10-23
Supplement: Supplementary file 1 [file 0d0527bd9fc12795c8a5d882.xlsx]

## Sheet: S Fig. 1
Supplementary Figure 1. Flow chart depicting the inclusion of the study population

## Sheet: S Table 1
Supplementary Table 1. Basic information across clusters and entire populationa
Characteristics	Cluster 1	Cluster 2	Cluster 3	Cluster 4	Custer 5	Cluster 6	Total
Participants (N/%)	23,818 (54.4)	6,658 (15.2)	4,876 (11.2)	4,177 (9.6)	3,404 (7.8)	793 (1.8)	43,726 (100)
Male (N/%)	12,062 (50.6)	3,364 (50.5)	2,504 (51.4)	2,062 (49.4)	1,738 (51.1)	393 (49.6)	22,123 (50.6)
Age (mean±SD)	45±9.7	45±9.7	45±9.6	45±9.6	45±9.9	45±9.4	45±9.7
BMI (mean±SD)	22±3.5	23±3.6	22±3.4	22±3.5	22±3.4	22±3.3	22±3.5
Heavy drinkerb (N/%)	3,747 (15.7)	1,049 (15.8)	764 (15.7)	662 (15.8)	531 (15.6)	118 (14.9)	6,871 (15.7)
High blood glucosec (N/%)	813 (3.4)	214 (3.2)	166 (3.4)	134 (3.2)	132 (3.9)	34 (4.3)	1,493 (3.4)
Smoking status (N/%)	3,388 (14.2)	940 (14.1)	675 (13.8)	619 (14.8)	462 (13.6)	122 (15.4)	6,206 (14.2)
a Values are number (percentage) unless otherwise described. SD: standard deviation
b Heavy drinkers are defined as who drink more than 6 times per week in the baseline survey.
c High blood glucose is defined as who answered ''yes'' to the question ''Have you been diagnosed with high blood sugar? (Fasting blood sugar: 126 mg/dL or higher, or HbA1c: 6.5% or higher)''
d Smoking status is defined as who answered ''yes'' to the question ''Do you smoke cigarettes''.

## Sheet: S Table 2
Supplementary Table 2. Annotation of SNPs with FST bigger than 3 times standard deviation using ANNOVAR
Feature	Genes	Chromosome	Start Position	End Position	SNP	FST	REF	ALT
intronic	DCDC2	6	24238196	24238196	rs140965246	0.0882731	C	T
intronic	DCDC2	6	24264343	24264343	rs145858317	0.0889307	C	T
intronic	DCDC2	6	24294055	24294055	rs78612998	0.0488462	T	C
intronic	DCDC2	6	24372995	24372995	rs138191414	0.0926439	A	G
intronic	GPLD1	6	24440337	24440337	rs115894968	0.0477026	T	C
intronic	GPLD1	6	24442085	24442085	rs138711481	0.0511328	G	A
intronic	GPLD1	6	24468927	24468927	rs2744563	0.0513174	A	G
intronic	KIAA0319	6	24558192	24558192	rs807539	0.0511326	T	G
intronic	KIAA0319	6	24584181	24584181	rs6902039	0.0873979	C	T
intronic	KIAA0319	6	24611493	24611493	rs7771169	0.109467	A	G
upstream	ARMH2(dist=182)	6	24799327	24799327	rs139126471	0.116862	C	G
intronic	RIPOR2	6	24916731	24916731	rs138093034	0.0576389	A	C
intronic	RIPOR2	6	25003339	25003339	6:25003339	0.0895998	T	C
ncRNA_intronic	CMAHP	6	25105361	25105361	rs302988	0.0797346	G	T
ncRNA_intronic	CMAHP	6	25122737	25122737	rs302971	0.0707096	G	A
intergenic	CMAHP(dist=2604),LOC101928663(dist=103922)	6	25141224	25141224	rs3749873	0.106718	C	T
intergenic	CMAHP(dist=20907),LOC101928663(dist=85619)	6	25159527	25159527	rs148672910	0.169721	A	G
intergenic	CMAHP(dist=34021),LOC101928663(dist=72505)	6	25172641	25172641	rs9467434	0.0576236	G	T
intergenic	CMAHP(dist=84312),LOC101928663(dist=22214)	6	25222932	25222932	rs78858282	0.156704	T	C
ncRNA_intronic	LOC101928663	6	25245873	25245873	rs80272928	0.126528	A	G
intronic	CARMIL1	6	25283177	25283177	rs144350646	0.116325	G	A
intronic	CARMIL1	6	25311428	25311428	rs75315538	0.20874	G	A
intronic	CARMIL1	6	25340600	25340600	rs143361148	0.226601	G	A
intronic	CARMIL1	6	25350791	25350791	rs139581790	0.227292	A	G
intronic	CARMIL1	6	25364735	25364735	rs76282978	0.123193	T	C
intronic	CARMIL1	6	25374063	25374063	rs4712922	0.0597008	A	G
intronic	CARMIL1	6	25391293	25391293	rs72830743	0.0615106	A	T
intronic	CARMIL1	6	25401131	25401131	rs16890551	0.0712647	T	C
intronic	CARMIL1	6	25411187	25411187	rs146458991	0.102459	C	T
intronic	CARMIL1	6	25435184	25435184	rs7761140	0.0601811	G	A
intronic	CARMIL1	6	25504649	25504649	rs374087	0.0892744	T	G
intronic	CARMIL1	6	25504877	25504877	rs12525553	0.0475975	T	C
intronic	CARMIL1	6	25505164	25505164	rs75892415	0.264601	C	G
intronic	CARMIL1	6	25553712	25553712	rs2072848	0.0554439	T	G
intronic	CARMIL1	6	25586427	25586427	rs12207674	0.103933	A	G
intronic	CARMIL1	6	25589592	25589592	rs7767930	0.0541072	A	G
intergenic	CARMIL1(dist=1475),SCGN(dist=30210)	6	25622233	25622233	rs941428	0.0609116	A	G
intergenic	CARMIL1(dist=3592),SCGN(dist=28093)	6	25624350	25624350	rs11969342	0.285339	T	C
intronic	SCGN	6	25654228	25654228	rs55883228	0.287311	A	T
intronic	SCGN	6	25674725	25674725	rs13217586	0.068016	T	C
intronic	SCGN	6	25684405	25684405	rs4711092	0.0473369	T	C
intronic	SCGN	6	25700350	25700350	rs12525479	0.0590034	G	A
intergenic	SCGN(dist=10155),H2AC1(dist=14128)	6	25712163	25712163	rs9348691	0.0635134	T	C
intergenic	SCGN(dist=16211),H2AC1(dist=8072)	6	25718219	25718219	rs79484327	0.299353	C	T
ncRNA_exonic	H2AC2P	6	25733083	25733083	rs75853457	0.297577	A	G
intergenic	H2AC2P(dist=2877),SLC17A4(dist=18961)	6	25735966	25735966	rs6924948	0.0636379	A	G
intergenic	H2AC2P(dist=12166),SLC17A4(dist=9672)	6	25745255	25745255	rs7754944	0.0637085	A	T
intergenic	H2AC2P(dist=17807),SLC17A4(dist=4031)	6	25750896	25750896	rs191929921	0.0747805	A	G
downstream	SLC17A4(dist=557)	6	25781983	25781983	rs9393668	0.0545227	C	T
intronic	SLC17A1	6	25790314	25790314	rs115188359	0.300765	C	T
intronic	SLC17A1	6	25816355	25816355	rs10498731	0.0544674	T	C
intronic	SLC17A3	6	25847089	25847089	rs6928027	0.271676	T	C
intronic	SLC17A3	6	25857829	25857829	rs58011016	0.0552785	C	T
intergenic	SLC17A3(dist=6375),SLC17A2(dist=32138)	6	25880846	25880846	rs4573076	0.05679	A	G
intergenic	SLC17A3(dist=30414),SLC17A2(dist=8099)	6	25904885	25904885	rs115113140	0.304464	T	C
intronic	SLC17A2	6	25928376	25928376	rs9295676	0.0627738	G	T
intergenic	SLC17A2(dist=19463),TRIM38(dist=12648)	6	25950382	25950382	rs7740793	0.0738517	G	T
downstream	H1-1(dist=89)	6	26017171	26017171	rs2237231	0.0631203	C	T
exonic	H3C3	6	26045737	26045737	rs3752418	0.0632734	C	G
intergenic	H1-2(dist=12795),LOC108783645(dist=17024)	6	26069494	26069494	rs9295682	0.0671101	G	C
ncRNA_intronic	LOC108783645	6	26089098	26089098	rs9366637	0.0643696	C	T
UTR3	HFE(NM_000410:c.*296T>A,NM_139011:c.*296T>A,NM_139010:c.*296T>A,NM_001300749:c.*111T>A,NM_139003:c.*296T>A,NM_139009:c.*296T>A,NM_139008:c.*296T>A,NM_139007:c.*296T>A,NM_139006:c.*296T>A,NM_139004:c.*296T>A)	6	26094750	26094750	rs62625350	0.292577	T	A
intergenic	H2AC6(dist=1868),H1-4(dist=29773)	6	26126786	26126786	rs9467676	0.0733983	C	T
intergenic	H2AC6(dist=25891),H1-4(dist=5750)	6	26150809	26150809	rs75546109	0.18327	G	C
intergenic	H2AC6(dist=26617),H1-4(dist=5024)	6	26151535	26151535	rs9358908	0.126677	G	T
intergenic	H2BC5(dist=4276),H2BC6(dist=8172)	6	26175852	26175852	rs9379831	0.150188	A	C
downstream	H2BC7(dist=461)	6	26200677	26200677	rs806794	0.152809	A	G
downstream	H2BC7(dist=536)	6	26200752	26200752	rs3757136	0.16786	C	G
intergenic	H4C5(dist=5897),H2BC8(dist=5283)	6	26211146	26211146	rs9358912	0.151376	G	T
intergenic	H1-3(dist=1852),H4C6(dist=3586)	6	26237068	26237068	rs80292109	0.15211	A	G
intergenic	H2BC9(dist=3207),H3C8(dist=15636)	6	26255510	26255510	rs114374008	0.244654	G	C
intergenic	H2BC9(dist=7445),H3C8(dist=11398)	6	26259748	26259748	rs806786	0.205379	G	A
intergenic	H4C8(dist=7285),BTN3A2(dist=72375)	6	26293012	26293012	rs77704135	0.250978	G	A
intergenic	H4C8(dist=10199),BTN3A2(dist=69461)	6	26295926	26295926	rs9393698	0.153043	G	A
intergenic	H4C8(dist=49549),BTN3A2(dist=30111)	6	26335276	26335276	rs9348708	0.154344	G	C
intergenic	H4C8(dist=59248),BTN3A2(dist=20412)	6	26344975	26344975	rs10946812	0.047977	C	G
intergenic	H4C8(dist=72416),BTN3A2(dist=7244)	6	26358143	26358143	rs2006196	0.3401	T	C
intronic	BTN3A2	6	26374658	26374658	rs2073526	0.0830567	A	G
upstream	BTN2A3P(dist=227)	6	26421392	26421392	rs1796521	0.0807471	C	T
intergenic	BTN3A3(dist=2168),BTN2A1(dist=2321)	6	26455811	26455811	rs9295689	0.0863308	T	C
intronic	BTN1A1	6	26505684	26505684	rs112262716	0.348769	A	C
UTR3	BTN1A1(NM_001732:c.*1203C>T)	6	26510605	26510605	rs1056668	0.0843405	C	T
intergenic	HMGN4(dist=9960),LOC105374988(dist=12431)	6	26557121	26557121	rs9467788	0.35509	G	C
intergenic	HMGN4(dist=13203),LOC105374988(dist=9188)	6	26560364	26560364	rs11752946	0.0583422	C	A
intergenic	LOC105374988(dist=16148),ABT1(dist=6107)	6	26591074	26591074	rs13207371	0.0578083	G	A
intergenic	ABT1(dist=7352),ZNF322(dist=26292)	6	26608319	26608319	rs9461277	0.355859	T	C
intergenic	ABT1(dist=9022),ZNF322(dist=24622)	6	26609989	26609989	rs13212985	0.285649	C	G
intergenic	ABT1(dist=27038),ZNF322(dist=6606)	6	26628005	26628005	rs34453863	0.0580604	T	C
intronic	ZNF322	6	26639474	26639474	rs3762804	0.33633	C	T
intergenic	ZNF322(dist=10638),GUSBP2(dist=168648)	6	26670618	26670618	rs149123117	0.287099	G	A
intergenic	ZNF322(dist=22343),GUSBP2(dist=156943)	6	26682323	26682323	rs2758383	0.05598	A	G
intergenic	ZNF322(dist=40660),GUSBP2(dist=138626)	6	26700640	26700640	rs569388573	0.287539	A	G
intergenic	ZNF322(dist=46564),GUSBP2(dist=132722)	6	26706544	26706544	rs2498399	0.05598	T	C
intergenic	ZNF322(dist=101765),GUSBP2(dist=77521)	6	26761745	26761745	rs34244947	0.287623	C	T
intergenic	ZNF322(dist=138625),GUSBP2(dist=40661)	6	26798605	26798605	rs9467917	0.35642	C	T
intergenic	ZNF322(dist=142054),GUSBP2(dist=37232)	6	26802034	26802034	rs79978880	0.0556352	T	C
intergenic	ZNF322(dist=164940),GUSBP2(dist=14346)	6	26824920	26824920	rs55664827	0.287733	C	T
intergenic	ZNF322(dist=173779),GUSBP2(dist=5507)	6	26833759	26833759	rs10807011	0.0556352	C	A
downstream	GUSBP2(dist=363)	6	26838903	26838903	rs9467924	0.357164	C	T
ncRNA_intronic	GUSBP2	6	26862462	26862462	rs12194399	0.0563298	T	C
ncRNA_intronic	GUSBP2	6	26866601	26866601	rs60143715	0.288508	A	G
ncRNA_intronic	GUSBP2	6	26874788	26874788	rs3925875	0.0608236	A	T
ncRNA_intronic	GUSBP2	6	26880192	26880192	rs9467928	0.358187	G	A
ncRNA_intronic	GUSBP2	6	26891603	26891603	rs11755443	0.0602593	T	C
ncRNA_intronic	GUSBP2	6	26895248	26895248	rs58060922	0.289269	A	C
ncRNA_intronic	GUSBP2	6	26899257	26899257	rs9295724	0.355994	G	A
ncRNA_intronic	GUSBP2	6	26903384	26903384	rs2224475	0.0633833	T	G
ncRNA_intronic	LINC00240	6	26927083	26927083	rs10946883	0.0641008	G	A
ncRNA_intronic	LINC00240	6	26958528	26958528	rs9467936	0.0682818	T	C
ncRNA_intronic	LINC00240	6	26962947	26962947	rs2754597	0.358351	G	A
ncRNA_intronic	LINC00240	6	26965779	26965779	rs12193875	0.0683979	C	T
ncRNA_intronic	LINC00240	6	26976288	26976288	rs2008668	0.358536	C	T
intergenic	LINC00240(dist=26348),H2BC11(dist=81994)	6	27018101	27018101	rs62401067	0.0685129	T	A
intergenic	LINC00240(dist=50399),H2BC11(dist=57943)	6	27042152	27042152	rs78059113	0.29477	G	A
intergenic	LINC00240(dist=63909),H2BC11(dist=44433)	6	27055662	27055662	rs9461330	0.0714213	G	A
ncRNA_exonic	MIR3143	6	27115467	27115467	rs17737028	0.294796	G	A
intergenic	MIR3143(dist=12840),PRSS16(dist=87173)	6	27128307	27128307	rs4713069	0.0713304	G	T
intergenic	MIR3143(dist=46708),PRSS16(dist=53305)	6	27162175	27162175	rs1102565	0.0754855	G	A
intergenic	MIR3143(dist=71888),PRSS16(dist=28125)	6	27187355	27187355	rs1156086	0.0986855	C	T
intergenic	MIR3143(dist=82780),PRSS16(dist=17233)	6	27198247	27198247	rs17686655	0.295215	G	A
intergenic	PRSS16(dist=13996),POM121L2(dist=38447)	6	27238395	27238395	rs142281439	0.291951	A	T
intergenic	POM121L2(dist=10071),VN1R10P(dist=2458)	6	27290082	27290082	rs2092114	0.0998685	C	T
intergenic	VN1R10P(dist=3079),ZNF204P(dist=28782)	6	27296820	27296820	rs147130283	0.0547534	C	T
intergenic	VN1R10P(dist=9107),ZNF204P(dist=22754)	6	27302848	27302848	rs9348762	0.187034	A	G
intergenic	VN1R10P(dist=10004),ZNF204P(dist=21857)	6	27303745	27303745	rs9368503	0.0500885	T	A
ncRNA_splicing	ZNF204P(NR_002722:exon2:c.1486+1T>G,NR_024553:exon3:c.366+1T>G)	6	27335295	27335295	rs75491088	0.265475	A	C
ncRNA_intronic	ZNF204P	6	27340623	27340623	rs192870931	0.295456	A	G
intronic	ZNF391	6	27357671	27357671	rs71559025	0.0508761	A	G
intronic	ZNF391	6	27361757	27361757	rs75276713	0.265349	G	T
intronic	ZNF391	6	27366821	27366821	rs12663650	0.0503381	C	A
intergenic	ZNF391(dist=25301),ZNF184(dist=21534)	6	27396987	27396987	rs116107648	0.30029	G	A
intergenic	ZNF391(dist=28863),ZNF184(dist=17972)	6	27400549	27400549	rs75652797	0.265727	T	C
intergenic	ZNF391(dist=31919),ZNF184(dist=14916)	6	27403605	27403605	rs4713098	0.0498869	C	T
intergenic	ZNF184(dist=4806),LINC01012(dist=216111)	6	27445703	27445703	rs7761966	0.0499601	C	T
intergenic	ZNF184(dist=16824),LINC01012(dist=204093)	6	27457721	27457721	rs149087883	0.0594328	G	C
intergenic	ZNF184(dist=34247),LINC01012(dist=186670)	6	27475144	27475144	rs2393964	0.0500514	A	C
intergenic	ZNF184(dist=39650),LINC01012(dist=181267)	6	27480547	27480547	rs76458558	0.265908	G	A
intergenic	ZNF184(dist=40639),LINC01012(dist=180278)	6	27481536	27481536	rs143583725	0.308339	G	A
intergenic	ZNF184(dist=91412),LINC01012(dist=129505)	6	27532309	27532309	rs139484815	0.0600028	C	A
intergenic	ZNF184(dist=96207),LINC01012(dist=124710)	6	27537104	27537104	rs12214820	0.27048	A	G
intergenic	ZNF184(dist=117772),LINC01012(dist=103145)	6	27558669	27558669	rs6907861	0.271186	C	T
intergenic	ZNF184(dist=143064),LINC01012(dist=77853)	6	27583961	27583961	rs2294480	0.0724115	A	G
intergenic	ZNF184(dist=163601),LINC01012(dist=57316)	6	27604498	27604498	rs115074120	0.312873	A	G
intergenic	ZNF184(dist=203165),LINC01012(dist=17752)	6	27644062	27644062	rs140366348	0.272609	G	A
intergenic	ZNF184(dist=219611),LINC01012(dist=1306)	6	27660508	27660508	rs9380007	0.0725559	C	T
ncRNA_intronic	LINC01012	6	27668510	27668510	rs151289341	0.283248	A	G
intergenic	LINC01012(dist=6506),LOC100131289(dist=45016)	6	27684507	27684507	rs72845876	0.314634	A	G
intergenic	LINC01012(dist=16420),LOC100131289(dist=35102)	6	27694421	27694421	rs9468209	0.0729284	T	C
intergenic	LOC100131289(dist=6027),H2BC13(dist=38264)	6	27736993	27736993	rs9295747	0.0726138	G	T
intergenic	LOC100131289(dist=9472),H2BC13(dist=34819)	6	27740438	27740438	rs12192568	0.299759	A	C
intergenic	LOC100131289(dist=42698),H2BC13(dist=1593)	6	27773664	27773664	rs200480	0.0722501	C	T
intergenic	H3C10(dist=1344),H2AC14(dist=2422)	6	27779658	27779658	rs144335201	0.219393	C	T
intergenic	H4C11(dist=4208),H4C12(dist=2486)	6	27796466	27796466	rs58117324	0.158865	T	A
intergenic	H2BC15(dist=14319),H2AC16(dist=11900)	6	27821207	27821207	rs189743278	0.219503	A	T
downstream	OR2B2(dist=225)	6	27878738	27878738	rs149878	0.0534093	G	T
intergenic	OR2B2(dist=22818),OR2B6(dist=22027)	6	27902992	27902992	rs7742858	0.36303	T	C
intergenic	OR2B6(dist=57267),OR1F12(dist=57867)	6	27983227	27983227	rs149972	0.0635165	T	C
intergenic	OR2B6(dist=63961),OR1F12(dist=51173)	6	27989921	27989921	rs9468267	0.120021	A	G
intergenic	OR2B6(dist=84118),OR1F12(dist=31016)	6	28010078	28010078	rs169431	0.0636179	C	G
intergenic	OR2B6(dist=86578),OR1F12(dist=28556)	6	28012538	28012538	rs143382446	0.0577247	A	C
intergenic	OR2B6(dist=89395),OR1F12(dist=25739)	6	28015355	28015355	rs7739987	0.362854	A	G
intergenic	OR2B6(dist=95300),OR1F12(dist=19834)	6	28021260	28021260	rs114113858	0.320167	A	T
exonic	OR1F12	6	28041977	28041977	rs73396550	0.118863	G	A
UTR5	ZNF165(NM_003447:c.-4635C>T)	6	28048624	28048624	rs203877	0.0611089	C	T
intergenic	ZSCAN12P1(dist=7900),ZSCAN16-AS1(dist=18180)	6	28071393	28071393	rs188105	0.0611574	T	C
intergenic	ZSCAN12P1(dist=16463),ZSCAN16-AS1(dist=9617)	6	28079956	28079956	rs7739332	0.119008	A	G
ncRNA_exonic	ZSCAN16-AS1	6	28089699	28089699	rs1631552	0.0611427	A	C
intronic	ZKSCAN8	6	28113746	28113746	rs1225716	0.0611445	C	A
intergenic	ZNF192P1(dist=4903),TOB2P1(dist=40840)	6	28142276	28142276	rs1150678	0.0733629	C	T
intergenic	ZNF192P1(dist=21777),TOB2P1(dist=23966)	6	28159150	28159150	rs116887348	0.0553176	T	G
intergenic	ZNF192P1(dist=30660),TOB2P1(dist=15083)	6	28168033	28168033	rs1150691	0.0551648	G	A
intergenic	ZNF192P1(dist=35846),TOB2P1(dist=9897)	6	28173219	28173219	rs1233708	0.0600738	A	G
intergenic	ZNF192P1(dist=39042),TOB2P1(dist=6701)	6	28176415	28176415	rs1233666	0.0798046	C	A
intergenic	ZNF192P1(dist=43284),TOB2P1(dist=2459)	6	28180657	28180657	rs116563181	0.322931	T	C
intronic	ZSCAN9	6	28197752	28197752	rs34024998	0.0658705	C	G
intronic	ZKSCAN4	6	28214698	28214698	rs17720293	0.323898	T	C
exonic	NKAPL	6	28227436	28227436	rs12000	0.0599533	G	A
intergenic	ZSCAN26(dist=1247),PGBD1(dist=2067)	6	28247247	28247247	rs114927617	0.323803	A	G
intergenic	PGBD1(dist=2622),ZSCAN31(dist=19567)	6	28272948	28272948	rs9468334	0.0819793	T	C
intronic	ZSCAN31	6	28302784	28302784	rs1416920	0.0819756	A	G
intronic	ZSCAN31	6	28317714	28317714	rs9468346	0.325148	A	C
intronic	ZKSCAN3,ZSCAN31	6	28320674	28320674	rs758398	0.0586234	T	C
intronic	ZKSCAN3	6	28326490	28326490	rs213232	0.06836	A	G
intergenic	ZKSCAN3(dist=4844),ZSCAN12(dist=10722)	6	28341793	28341793	rs76711116	0.0590202	A	G
intergenic	ZKSCAN3(dist=12315),ZSCAN12(dist=3251)	6	28349264	28349264	rs2531825	0.0645202	C	T
intergenic	ZKSCAN3(dist=13627),ZSCAN12(dist=1939)	6	28350576	28350576	rs9654587	0.377024	C	T
intergenic	ZSCAN12(dist=8986),ZSCAN23(dist=23922)	6	28376510	28376510	rs6912921	0.377137	A	G
intergenic	ZSCAN12(dist=11134),ZSCAN23(dist=21774)	6	28378658	28378658	rs148347206	0.0567158	C	A
intergenic	ZSCAN12(dist=11836),ZSCAN23(dist=21072)	6	28379360	28379360	rs9468371	0.064581	A	G
intergenic	ZSCAN12(dist=22627),ZSCAN23(dist=10281)	6	28390151	28390151	rs75993268	0.230855	G	A
intergenic	ZSCAN12(dist=26174),ZSCAN23(dist=6734)	6	28393698	28393698	rs80123514	0.378886	G	T
intergenic	ZSCAN12(dist=30427),ZSCAN23(dist=2481)	6	28397951	28397951	rs2247002	0.0645614	G	C
intergenic	ZSCAN23(dist=6771),GPX6(dist=53034)	6	28418039	28418039	rs2859368	0.0653218	T	C
intergenic	ZSCAN23(dist=9239),GPX6(dist=50566)	6	28420507	28420507	rs146101881	0.230879	T	C
intergenic	ZSCAN23(dist=54087),GPX6(dist=5718)	6	28465355	28465355	rs2859356	0.056349	T	C
intergenic	ZSCAN23(dist=54215),GPX6(dist=5590)	6	28465483	28465483	rs79538898	0.378686	A	C
intergenic	ZSCAN23(dist=55802),GPX6(dist=4003)	6	28467070	28467070	rs146362527	0.231282	T	C
intronic	GPX6	6	28477682	28477682	rs10428759	0.26853	T	C
intergenic	GPX6(dist=8537),GPX5(dist=1551)	6	28492107	28492107	rs442174	0.352784	A	T
intergenic	GPX5(dist=1907),ZBED9(dist=33673)	6	28504639	28504639	rs392230	0.0579039	A	G
intergenic	GPX5(dist=3261),ZBED9(dist=32319)	6	28505993	28505993	rs114627125	0.326408	A	T
intronic	ZBED9	6	28547215	28547215	rs117423601	0.218728	G	A
intronic	ZBED9	6	28549265	28549265	rs77360117	0.329619	G	A
intergenic	ZBED9(dist=10629),LINC00533(dist=21480)	6	28594583	28594583	rs550848168	0.329619	C	G
intergenic	ZBED9(dist=12026),LINC00533(dist=20083)	6	28595980	28595980	rs10807032	0.357215	T	C
intergenic	ZBED9(dist=27629),LINC00533(dist=4480)	6	28611583	28611583	rs7755705	0.0595019	T	G
ncRNA_exonic	LINC00533	6	28616066	28616066	rs911177	0.384392	T	A
ncRNA_splicing	LINC00533(NR_135285:exon2:c.45-1A>G)	6	28616844	28616844	rs114216976	0.329869	T	C
intergenic	LINC00533(dist=19705),LINC01623(dist=185445)	6	28641957	28641957	rs3864294	0.219571	G	A
intergenic	LINC00533(dist=28985),LINC01623(dist=176165)	6	28651237	28651237	rs73409140	0.330408	C	G
intergenic	LINC00533(dist=37754),LINC01623(dist=167396)	6	28660006	28660006	rs9393923	0.384734	A	G
intergenic	LINC00533(dist=47063),LINC01623(dist=158087)	6	28669315	28669315	rs6939576	0.0827774	A	G
intergenic	LINC00533(dist=47358),LINC01623(dist=157792)	6	28669610	28669610	rs143144207	0.330659	G	A
intergenic	LINC00533(dist=53941),LINC01623(dist=151209)	6	28676193	28676193	rs9368570	0.0879733	G	A
intergenic	LINC00533(dist=64032),LINC01623(dist=141118)	6	28686284	28686284	rs2394152	0.0637445	C	T
intergenic	LINC00533(dist=71550),LINC01623(dist=133600)	6	28693802	28693802	rs116446793	0.331352	C	T
intergenic	LINC00533(dist=82781),LINC01623(dist=122369)	6	28705033	28705033	rs72500863	0.38673	T	C
intergenic	LINC00533(dist=84660),LINC01623(dist=120490)	6	28706912	28706912	rs880638	0.0592778	A	G
intergenic	LINC00533(dist=114721),LINC01623(dist=90429)	6	28736973	28736973	rs9257158	0.0888085	T	G
intergenic	LINC00533(dist=132268),LINC01623(dist=72882)	6	28754520	28754520	rs9257181	0.0878766	T	C
intergenic	LINC00533(dist=145875),LINC01623(dist=59275)	6	28768127	28768127	rs141456208	0.237542	G	C
intergenic	LINC00533(dist=149136),LINC01623(dist=56014)	6	28771388	28771388	rs35045623	0.332082	A	G
intergenic	LINC00533(dist=155132),LINC01623(dist=50018)	6	28777384	28777384	rs80355632	0.384062	C	A
intergenic	LINC00533(dist=171353),LINC01623(dist=33797)	6	28793605	28793605	rs209180	0.0595086	T	C
intergenic	LINC01623(dist=21043),HCG14(dist=11810)	6	28852497	28852497	rs73741219	0.379555	A	G
downstream	TRIM27(dist=388)	6	28870391	28870391	rs209127	0.0596614	C	T
intergenic	TRIM27(dist=5452),LINC01556(dist=14347)	6	28897214	28897214	rs876737	0.0596097	A	G
intergenic	LINC01556(dist=2341),HCG15(dist=37870)	6	28914656	28914656	rs150843095	0.051186	T	C
intergenic	LINC01556(dist=4584),HCG15(dist=35627)	6	28916899	28916899	rs9257402	0.0602734	A	G
intergenic	LINC01556(dist=12033),HCG15(dist=28178)	6	28924348	28924348	rs59192199	0.380132	G	A
intergenic	LINC01556(dist=28238),HCG15(dist=11973)	6	28940553	28940553	rs6926892	0.0602315	G	A
intergenic	ZNF311(dist=11366),LOC100129636(dist=19043)	6	28984755	28984755	rs3129795	0.258446	T	G
intergenic	ZNF311(dist=15874),LOC100129636(dist=14535)	6	28989263	28989263	rs9348817	0.0575733	C	T
ncRNA_intronic	LOC100129636	6	29016587	29016587	rs6456891	0.0631897	A	G
ncRNA_intronic	LOC100129636	6	29034979	29034979	rs146663041	0.362214	G	T
ncRNA_intronic	LOC100129636	6	29036444	29036444	rs3129786	0.254704	G	T
intergenic	LOC100129636(dist=1903),OR2B3(dist=7565)	6	29046420	29046420	rs2064365	0.0624843	T	A
intergenic	OR2B3(dist=4872),OR2J1(dist=8658)	6	29059962	29059962	rs3129789	0.254674	T	C
intergenic	OR2B3(dist=10765),OR2J1(dist=2765)	6	29065855	29065855	rs145263686	0.0608131	A	G
exonic	OR2J1	6	29069016	29069016	rs3131088	0.063203	A	G
downstream	OR2J3(dist=500)	6	29081161	29081161	rs3129106	0.336968	G	T
intergenic	OR2J3(dist=27672),OR2J2(dist=32978)	6	29108333	29108333	rs115578457	0.336968	C	T
intergenic	OR2J3(dist=54709),OR2J2(dist=5941)	6	29135370	29135370	rs28892007	0.337084	T	C
intergenic	OR2J2(dist=5846),LOC101929006(dist=43553)	6	29148197	29148197	rs182567634	0.240369	T	C
intergenic	OR2J2(dist=20482),LOC101929006(dist=28917)	6	29162833	29162833	rs3828924	0.0601379	G	A
intergenic	OR2J2(dist=21917),LOC101929006(dist=27482)	6	29164268	29164268	rs75228073	0.380546	C	T
intergenic	OR2J2(dist=38024),LOC101929006(dist=11375)	6	29180375	29180375	rs143608025	0.240369	C	A
ncRNA_intronic	LOC101929006	6	29201075	29201075	rs73743654	0.380858	G	A
ncRNA_intronic	LOC101929006	6	29210596	29210596	rs3117340	0.0582267	G	T
ncRNA_intronic	LOC101929006	6	29210998	29210998	rs9468500	0.230547	T	A
ncRNA_exonic	LOC101929006	6	29231831	29231831	rs77154096	0.231296	T	C
ncRNA_intronic	LOC101929006	6	29252758	29252758	rs116466121	0.118845	T	A
ncRNA_intronic	LOC101929006	6	29256420	29256420	rs1884123	0.0572587	G	A
downstream	OR14J1(dist=75)	6	29275507	29275507	rs9257696	0.0948598	C	T
intergenic	OR14J1(dist=4517),OR5V1(dist=43058)	6	29279949	29279949	rs35095140	0.0850127	T	C
intergenic	OR14J1(dist=7130),OR5V1(dist=40445)	6	29282562	29282562	rs73743667	0.381687	C	T
intergenic	OR14J1(dist=31224),OR5V1(dist=16351)	6	29306656	29306656	rs9257745	0.096941	T	C
intergenic	OR14J1(dist=37046),OR5V1(dist=10529)	6	29312478	29312478	rs34253991	0.086161	C	G
intergenic	OR5V1(dist=13021),OR12D3(dist=4125)	6	29337075	29337075	rs3930883	0.0646363	G	T
UTR3	OR12D3(NM_030959:c.*565T>C)	6	29341549	29341549	rs141043410	0.0651773	A	G
upstream	OR12D3(dist=287)	6	29343355	29343355	rs9257802	0.117417	T	C
intergenic	OR12D3(dist=7786),OR12D2(dist=13562)	6	29350854	29350854	rs1419640	0.0849882	G	T
intergenic	OR12D3(dist=12170),OR12D2(dist=9178)	6	29355238	29355238	rs11966698	0.367697	T	C
UTR3	OR12D2(NM_013936:c.*23T>A)	6	29365423	29365423	rs2073149	0.109539	T	A
downstream	OR12D2(dist=658)	6	29366106	29366106	rs7775217	0.394642	A	C
intergenic	OR12D2(dist=8595),OR12D1(dist=10799)	6	29374043	29374043	rs74294672	0.396784	A	T
intergenic	OR12D2(dist=12991),OR12D1(dist=6403)	6	29378439	29378439	rs2097771	0.108476	G	A
downstream	OR12D1(dist=739)	6	29386912	29386912	rs115175926	0.322889	C	T
intergenic	OR12D1(dist=1436),OR11A1(dist=5672)	6	29387609	29387609	rs60213092	0.396436	A	G
intergenic	OR12D1(dist=2133),OR11A1(dist=4975)	6	29388306	29388306	rs3094562	0.0763381	G	A
intergenic	OR11A1(dist=1365),OR10C1(dist=10842)	6	29396874	29396874	rs3128851	0.0763481	T	C
intergenic	OR11A1(dist=2012),OR10C1(dist=10195)	6	29397521	29397521	rs7349908	0.077721	A	T
intergenic	OR11A1(dist=4727),OR10C1(dist=7480)	6	29400236	29400236	rs9257858	0.15134	C	G
intergenic	OR11A1(dist=6332),OR10C1(dist=5875)	6	29401841	29401841	rs2107187	0.396644	G	A
exonic	OR10C1	6	29408528	29408528	rs2074464	0.0871536	G	A
intergenic	OR10C1(dist=7062),OR2H1(dist=9116)	6	29415816	29415816	rs6907104	0.353191	C	A
intergenic	OR2H1(dist=2196),MAS1L(dist=20179)	6	29434295	29434295	rs2107191	0.0903304	C	T
intergenic	OR2H1(dist=19069),MAS1L(dist=3306)	6	29451168	29451168	rs2107189	0.353299	A	G
intergenic	MAS1L(dist=18232),LINC01015(dist=23218)	6	29473965	29473965	rs73400996	0.322695	A	G
intergenic	MAS1L(dist=19091),LINC01015(dist=22359)	6	29474824	29474824	rs734962	0.0902055	T	G
intergenic	MAS1L(dist=20649),LINC01015(dist=20801)	6	29476382	29476382	rs75068079	0.398285	T	C
intergenic	MAS1L(dist=29556),LINC01015(dist=11894)	6	29485289	29485289	rs9257887	0.133898	A	G
intergenic	MAS1L(dist=32235),LINC01015(dist=9215)	6	29487968	29487968	rs12210150	0.354096	T	C
intergenic	MAS1L(dist=32745),LINC01015(dist=8705)	6	29488478	29488478	rs2745401	0.0881234	A	G
ncRNA_exonic	LINC01015	6	29501182	29501182	rs2294748	0.354922	A	G
intergenic	LINC01015(dist=10505),UBD(dist=11442)	6	29511850	29511850	rs1233417	0.102311	C	T
intergenic	LINC01015(dist=14835),UBD(dist=7112)	6	29516180	29516180	rs387659	0.114702	A	G
intergenic	LINC01015(dist=17828),UBD(dist=4119)	6	29519173	29519173	rs17351888	0.355557	C	T
intronic	UBD	6	29526940	29526940	rs362536	0.113908	C	T
intergenic	UBD(dist=3336),SNORD32B(dist=19184)	6	29530845	29530845	rs362530	0.151744	A	G
intergenic	UBD(dist=10894),SNORD32B(dist=11626)	6	29538403	29538403	rs1003582	0.151463	C	G
intergenic	UBD(dist=16137),SNORD32B(dist=6383)	6	29543646	29543646	rs362525	0.143579	G	T
intergenic	SNORD32B(dist=3622),OR2H2(dist=1956)	6	29553727	29553727	rs1233388	0.0872784	A	G
upstream	OR2H2(dist=98)	6	29555585	29555585	rs17184367	0.0960172	G	A
downstream	GABBR1(dist=50)	6	29569955	29569955	rs3025643	0.144458	A	G
exonic	GABBR1	6	29576393	29576393	rs29230	0.158853	G	A
intronic	GABBR1	6	29582645	29582645	rs74294678	0.40527	T	C
intronic	GABBR1	6	29583424	29583424	rs9468561	0.100665	T	G
intronic	GABBR1	6	29599102	29599102	rs29243	0.405198	A	G
intergenic	GABBR1(dist=2176),MOG(dist=21733)	6	29603136	29603136	rs3095270	0.0985394	C	A
intergenic	GABBR1(dist=5834),MOG(dist=18075)	6	29606794	29606794	rs3131857	0.204148	T	C
intergenic	GABBR1(dist=8991),MOG(dist=14918)	6	29609951	29609951	rs1233372	0.129506	A	G
intronic	MOG	6	29638179	29638179	rs2273192	0.374727	G	A
intergenic	ZFP57(dist=1908),HLA-F(dist=40280)	6	29650837	29650837	rs3131844	0.127139	T	C
intergenic	ZFP57(dist=14960),HLA-F(dist=27228)	6	29663889	29663889	rs3131888	0.104035	T	C
intergenic	ZFP57(dist=17735),HLA-F(dist=24453)	6	29666664	29666664	rs6915952	0.106062	T	G
intergenic	ZFP57(dist=21138),HLA-F(dist=21050)	6	29670067	29670067	rs3129060	0.106083	C	G
intergenic	ZFP57(dist=26275),HLA-F(dist=15913)	6	29675204	29675204	rs3116787	0.159928	C	A
intergenic	ZFP57(dist=27787),HLA-F(dist=14401)	6	29676716	29676716	rs1610588	0.0789958	T	C
intergenic	ZFP57(dist=32364),HLA-F(dist=9824)	6	29681293	29681293	rs734259	0.0788982	T	C
upstream	HLA-F(dist=448)	6	29690669	29690669	rs9258183	0.0670984	G	A
ncRNA_intronic	HLA-F-AS1	6	29707661	29707661	rs1736905	0.0774738	A	G
intergenic	IFITM4P(dist=7625),HCG4(dist=32258)	6	29726550	29726550	rs1633059	0.111383	C	T
intergenic	IFITM4P(dist=13670),HCG4(dist=26213)	6	29732595	29732595	rs1737062	0.118976	T	C
intergenic	IFITM4P(dist=13819),HCG4(dist=26064)	6	29732744	29732744	rs370631	0.105969	C	T
intergenic	IFITM4P(dist=18638),HCG4(dist=21245)	6	29737563	29737563	rs1737030	0.109185	A	G
intergenic	IFITM4P(dist=29469),HCG4(dist=10414)	6	29748394	29748394	rs1611232	0.104202	A	G
intergenic	IFITM4P(dist=29721),HCG4(dist=10162)	6	29748646	29748646	rs1611235	0.115479	C	A
intergenic	IFITM4P(dist=35075),HCG4(dist=4808)	6	29754000	29754000	rs1737016	0.111698	A	C
intergenic	IFITM4P(dist=36526),HCG4(dist=3357)	6	29755451	29755451	rs2743941	0.260913	T	C
ncRNA_intronic	HLA-V	6	29761253	29761253	rs77720030	0.13402	A	G
intergenic	HLA-V(dist=1077),HLA-G(dist=28095)	6	29766661	29766661	rs1736993	0.10467	A	G
intergenic	HLA-V(dist=1094),HLA-G(dist=28078)	6	29766678	29766678	rs1819785	0.115693	C	A
intergenic	HLA-V(dist=7090),HLA-G(dist=22082)	6	29772674	29772674	rs1632985	0.111935	C	T
intergenic	HLA-V(dist=16542),HLA-G(dist=12630)	6	29782126	29782126	rs17178952	0.414475	T	C
intergenic	HLA-V(dist=16747),HLA-G(dist=12425)	6	29782331	29782331	rs11753629	0.138812	A	G
intergenic	HLA-V(dist=20444),HLA-G(dist=8728)	6	29786028	29786028	rs7742733	0.109497	A	G
intergenic	HLA-V(dist=27108),HLA-G(dist=2064)	6	29792692	29792692	rs2394696	0.142352	T	C
ncRNA_exonic	ZNRD1ASP	6	29802021	29802021	rs61580820	0.377094	G	C
ncRNA_exonic	ZNRD1ASP	6	29802551	29802551	rs2523792	0.108183	T	C
intergenic	ZNRD1ASP(dist=3203),HCP5B(dist=33639)	6	29806033	29806033	6:29806033	0.377157	G	C
intergenic	ZNRD1ASP(dist=5634),HCP5B(dist=31208)	6	29808464	29808464	rs2735005	0.108033	G	A
intergenic	ZNRD1ASP(dist=8115),HCP5B(dist=28727)	6	29810945	29810945	6:29810945	0.377157	A	G
intergenic	ZNRD1ASP(dist=9250),HCP5B(dist=27592)	6	29812080	29812080	rs34286010	0.113906	T	A
intergenic	ZNRD1ASP(dist=14787),HCP5B(dist=22055)	6	29817617	29817617	6:29817617	0.0979393	A	G
intergenic	ZNRD1ASP(dist=16451),HCP5B(dist=20391)	6	29819281	29819281	rs12528253	0.200188	A	G
intergenic	ZNRD1ASP(dist=17079),HCP5B(dist=19763)	6	29819909	29819909	rs2508053	0.112687	T	C
intergenic	ZNRD1ASP(dist=19411),HCP5B(dist=17431)	6	29822241	29822241	rs9258648	0.109717	T	C
intergenic	ZNRD1ASP(dist=21890),HCP5B(dist=14952)	6	29824720	29824720	6:29824720	0.112679	G	A
intergenic	ZNRD1ASP(dist=25663),HCP5B(dist=11179)	6	29828493	29828493	rs1611705	0.112679	G	T
intergenic	ZNRD1ASP(dist=29340),HCP5B(dist=7502)	6	29832170	29832170	rs9258797	0.110481	G	A
intergenic	ZNRD1ASP(dist=31619),HCP5B(dist=5223)	6	29834449	29834449	6:29834449	0.098903	A	G
intergenic	ZNRD1ASP(dist=32088),HCP5B(dist=4754)	6	29834918	29834918	6:29834918	0.153688	A	C
intergenic	ZNRD1ASP(dist=32243),HCP5B(dist=4599)	6	29835073	29835073	6:29835073	0.0794694	G	A
intergenic	ZNRD1ASP(dist=34482),HCP5B(dist=2360)	6	29837312	29837312	rs9258890	0.0794694	G	A
intergenic	ZNRD1ASP(dist=35179),HCP5B(dist=1663)	6	29838009	29838009	rs3873265	0.153688	T	C
ncRNA_exonic	HCP5B	6	29840510	29840510	rs3129008	0.0794932	T	C
ncRNA_exonic	HCP5B	6	29841162	29841162	rs3132711	0.153698	T	G
upstream	HCP5B(dist=781)	6	29842341	29842341	rs9259009	0.0804417	A	C
intergenic	HCP5B(dist=1508),HLA-H(dist=12282)	6	29843068	29843068	rs3087959	0.19422	A	G
intergenic	HCG4B(dist=12124),HLA-A(dist=3131)	6	29907116	29907116	rs201477120	0.200129	G	A
intergenic	HCG4B(dist=12141),HLA-A(dist=3114)	6	29907133	29907133	rs9260026	0.109694	G	A
intergenic	HCG4B(dist=12177),HLA-A(dist=3078)	6	29907169	29907169	rs9260027	0.109779	C	A
intergenic	HCG4B(dist=13448),HLA-A(dist=1807)	6	29908440	29908440	rs9260059	0.109717	G	A
exonic	HLA-A	6	29910716	29910716	rs1059455	0.0998428	C	G
exonic	HLA-A	6	29910761	29910761	rs1136688	0.10563	G	A
intronic	HLA-A	6	29911790	29911790	rs9260166	0.101424	T	C
intronic	HLA-A	6	29913067	29913067	rs3823342	0.102518	T	C
intergenic	HLA-A(dist=2807),HCG9(dist=26424)	6	29916468	29916468	rs3016021	0.102167	C	T
intergenic	HLA-A(dist=4975),HCG9(dist=24256)	6	29918636	29918636	rs17185992	0.137703	C	T
intergenic	HLA-A(dist=5470),HCG9(dist=23761)	6	29919131	29919131	rs17179816	0.199763	T	C
intergenic	HLA-A(dist=7574),HCG9(dist=21657)	6	29921235	29921235	rs9260532	0.0936985	C	T
intergenic	HLA-A(dist=14609),HCG9(dist=14622)	6	29928270	29928270	rs437464	0.109584	G	C
intergenic	HLA-A(dist=18346),HCG9(dist=10885)	6	29932007	29932007	rs2252963	0.109613	A	G
intergenic	HLA-A(dist=24123),HCG9(dist=5108)	6	29937784	29937784	rs2523972	0.109529	C	T
ncRNA_intronic	HCG9	6	29943866	29943866	rs2245950	0.110759	A	G
intergenic	HCG9(dist=4872),ZNRD1ASP(dist=17739)	6	29951049	29951049	rs73428122	0.194571	G	T
intergenic	HCG9(dist=4929),ZNRD1ASP(dist=17682)	6	29951106	29951106	rs2735067	0.132309	G	A
intergenic	HCG9(dist=7626),ZNRD1ASP(dist=14985)	6	29953803	29953803	rs73428152	0.201121	A	C
intergenic	HCG9(dist=10228),ZNRD1ASP(dist=12383)	6	29956405	29956405	rs2735064	0.132275	A	G
intergenic	HCG9(dist=16221),ZNRD1ASP(dist=6390)	6	29962398	29962398	rs9260987	0.118455	A	G
intergenic	HCG9(dist=16888),ZNRD1ASP(dist=5723)	6	29963065	29963065	rs6457121	0.0700659	A	G
intergenic	HCG9(dist=20951),ZNRD1ASP(dist=1660)	6	29967128	29967128	rs2530388	0.132211	T	A
ncRNA_splicing	HLA-J(NR_024240:exon6:c.1131+1C>G)	6	29977145	29977145	rs356969	0.132011	C	G
ncRNA_intronic	ZNRD1ASP	6	29989695	29989695	rs165255	0.132134	C	G
ncRNA_intronic	ZNRD1ASP	6	30005305	30005305	rs259933	0.132143	A	G
ncRNA_intronic	ZNRD1ASP	6	30015905	30015905	rs3134879	0.109049	C	T
ncRNA_intronic	ZNRD1ASP	6	30016297	30016297	rs6457138	0.20132	C	A
intronic	ZNRD1	6	30031345	30031345	rs1150739	0.0922639	T	C
intronic	RNF39	6	30042955	30042955	rs1150736	0.11651	T	C
intergenic	RNF39(dist=10178),TRIM31(dist=16868)	6	30053806	30053806	rs9261355	0.129753	C	A
intergenic	RNF39(dist=21691),TRIM31(dist=5355)	6	30065319	30065319	rs1264704	0.0965728	G	A
ncRNA_intronic	TRIM31-AS1	6	30077135	30077135	rs9378220	0.120483	A	C
intergenic	TRIM31-AS1(dist=7835),TRIM40(dist=13581)	6	30090336	30090336	rs9366753	0.122605	T	C
intergenic	TRIM31-AS1(dist=10206),TRIM40(dist=11210)	6	30092707	30092707	rs1419675	0.155691	G	T
intronic	TRIM40	6	30105743	30105743	rs2107202	0.15603	T	C
intronic	TRIM15	6	30138162	30138162	rs1029239	0.0985395	C	G
intronic	TRIM26	6	30160055	30160055	rs2284165	0.14216	G	C
UTR5	TRIM26(NM_003449:c.-1949A>G,NM_001242783:c.-1949A>G)	6	30168829	30168829	rs2239531	0.125598	T	C
intronic	TRIM26	6	30179164	30179164	rs3130385	0.217978	T	C
upstream	TRIM26(dist=651)	6	30181834	30181834	rs9378221	0.125448	C	T
intergenic	TRIM26(dist=17833),HCG17(dist=2800)	6	30199016	30199016	rs3094138	0.220011	C	T
ncRNA_intronic	HCG17	6	30214011	30214011	rs72841870	0.121569	C	G
ncRNA_intronic	HCG17	6	30220340	30220340	rs9261623	0.417514	C	G
ncRNA_exonic	HLA-L	6	30229463	30229463	rs2023477	0.0994465	A	G
ncRNA_intronic	HCG17	6	30245870	30245870	rs3132652	0.417734	C	T
ncRNA_intronic	HCG17	6	30252606	30252606	rs2394779	0.102517	C	A
ncRNA_intronic	HCG17,HCG18	6	30276208	30276208	rs118062925	0.310836	C	G
ncRNA_intronic	HCG17,HCG18	6	30285121	30285121	rs9357097	0.097821	C	T
intronic	TRIM39,TRIM39-RPP21	6	30304293	30304293	rs9394002	0.102673	A	G
intergenic	RPP21(dist=10860),HLA-E(dist=131755)	6	30325531	30325531	rs3130379	0.400103	T	C
intergenic	RPP21(dist=25620),HLA-E(dist=116995)	6	30340291	30340291	rs9295847	0.0957776	T	C
intergenic	RPP21(dist=32697),HLA-E(dist=109918)	6	30347368	30347368	rs970268	0.114926	A	G
intergenic	RPP21(dist=38315),HLA-E(dist=104300)	6	30352986	30352986	rs6936943	0.0974669	G	A
intergenic	RPP21(dist=38865),HLA-E(dist=103750)	6	30353536	30353536	rs116159669	0.246624	G	A
intergenic	RPP21(dist=45479),HLA-E(dist=97136)	6	30360150	30360150	rs9404965	0.115328	T	C
intergenic	RPP21(dist=50539),HLA-E(dist=92076)	6	30365210	30365210	rs1264570	0.0988736	C	T
intergenic	RPP21(dist=50649),HLA-E(dist=91966)	6	30365320	30365320	rs1264569	0.236029	C	T
intergenic	RPP21(dist=51405),HLA-E(dist=91210)	6	30366076	30366076	rs1264568	0.401071	G	C
intergenic	RPP21(dist=52342),HLA-E(dist=90273)	6	30367013	30367013	rs1362118	0.102568	G	A
intergenic	RPP21(dist=58141),HLA-E(dist=84474)	6	30372812	30372812	rs1264562	0.101386	G	T
intergenic	RPP21(dist=77304),HLA-E(dist=65311)	6	30391975	30391975	rs3130127	0.0989984	A	T
intergenic	RPP21(dist=97232),HLA-E(dist=45383)	6	30411903	30411903	rs1264516	0.0988593	C	A
intergenic	RPP21(dist=106107),HLA-E(dist=36508)	6	30420778	30420778	rs28780103	0.425051	A	G
intergenic	RPP21(dist=106450),HLA-E(dist=36165)	6	30421121	30421121	rs150355323	0.308024	C	T
intergenic	RPP21(dist=111880),HLA-E(dist=30735)	6	30426551	30426551	rs2524178	0.0987912	G	T
intergenic	RPP21(dist=116340),HLA-E(dist=26275)	6	30431011	30431011	rs115266049	0.361545	A	G
intergenic	RPP21(dist=119800),HLA-E(dist=22815)	6	30434471	30434471	rs7761210	0.110873	C	T
intergenic	RPP21(dist=133346),HLA-E(dist=9269)	6	30448017	30448017	rs28780105	0.425125	C	T
intergenic	RPP21(dist=138291),HLA-E(dist=4324)	6	30452962	30452962	rs9394007	0.103871	G	T
intergenic	RPP21(dist=140532),HLA-E(dist=2083)	6	30455203	30455203	rs17875359	0.134131	A	G
intergenic	RPP21(dist=140650),HLA-E(dist=1965)	6	30455321	30455321	rs17875360	0.179551	C	T
intergenic	HLA-E(dist=4534),LINC02569(dist=17538)	6	30466505	30466505	rs2516661	0.102123	G	T
intergenic	HLA-E(dist=18379),LINC02569(dist=3693)	6	30480350	30480350	rs549060653	0.368606	T	C
intergenic	LINC02569(dist=3021),GNL1(dist=18777)	6	30490378	30490378	rs2516655	0.10218	G	A
intronic	PRR3	6	30527296	30527296	rs114055010	0.376774	G	C
intronic	PRR3	6	30529475	30529475	rs4713337	0.299722	T	C
intronic	ABCF1	6	30555518	30555518	rs112596482	0.110595	T	C
downstream	ABCF1(dist=68)	6	30559367	30559367	rs115650046	0.302956	G	A
intergenic	ABCF1(dist=4494),PPP1R10(dist=4397)	6	30563793	30563793	rs3130045	0.102531	C	G
intronic	PPP1R10	6	30573513	30573513	rs1264421	0.110305	A	T
intronic	PPP1R10	6	30582876	30582876	rs149305600	0.320563	C	G
intronic	MRPS18B	6	30590122	30590122	rs2517566	0.173168	C	T
UTR3	ATAT1(NM_024909:c.*337C>A,NM_001254952:c.*337C>A,NM_001318762:c.*884C>A,NM_001318763:c.*884C>A,NM_001190724:c.*884C>A)	6	30611676	30611676	rs1140809	0.113453	C	A
intronic	ATAT1	6	30612861	30612861	rs117993568	0.320282	G	T
intronic	DHX16	6	30624155	30624155	rs1124795	0.170767	C	T
downstream	PPP1R18(dist=399)	6	30643767	30643767	rs28360604	0.123526	G	C
intergenic	NRM(dist=4371),MDC1(dist=4016)	6	30663568	30663568	rs11752408	0.113039	G	T
intronic	MDC 1.00	6	30668488	30668488	rs2894043	0.171155	G	C
intronic	MDC 1.00	6	30681315	30681315	rs114634557	0.406664	T	G
upstream	TUBB(dist=657)	6	30687472	30687472	rs117670375	0.318891	T	C
intronic	FLOT1	6	30696797	30696797	rs9262154	0.104905	C	T
intronic	FLOT1	6	30706013	30706013	rs2844704	0.293921	A	C
intergenic	IER3(dist=2322),HCG20(dist=19956)	6	30714646	30714646	rs117203306	0.250173	T	G
intergenic	IER3(dist=17591),HCG20(dist=4687)	6	30729915	30729915	rs9262171	0.422091	A	T
ncRNA_intronic	HCG20	6	30743014	30743014	rs17481190	0.105693	T	C
ncRNA_intronic	HCG20	6	30754816	30754816	rs28780114	0.106196	T	C
intergenic	HCG20(dist=2003),LINC00243(dist=18613)	6	30762030	30762030	rs28780120	0.106366	C	T
intergenic	HCG20(dist=8556),LINC00243(dist=12060)	6	30768583	30768583	rs4711234	0.108442	A	G
intergenic	HCG20(dist=14212),LINC00243(dist=6404)	6	30774239	30774239	rs13203124	0.11161	A	G
intergenic	HCG20(dist=16147),LINC00243(dist=4469)	6	30776174	30776174	rs9404970	0.107366	C	T
ncRNA_intronic	LINC00243	6	30783334	30783334	rs28744112	0.108322	T	G
ncRNA_intronic	LINC00243	6	30793937	30793937	rs4713392	0.111637	T	C
ncRNA_intronic	LINC00243	6	30798277	30798277	rs78868683	0.289761	C	G
upstream	LINC00243(dist=963)	6	30799399	30799399	rs9501030	0.106047	A	T
intergenic	LINC02570(dist=5425),DDR1(dist=29029)	6	30821361	30821361	rs9501491	0.107564	T	C
upstream	DDR1(dist=568)	6	30849822	30849822	rs9295930	0.107723	A	G
downstream	DDR1(dist=25)	6	30867958	30867958	rs9468843	0.107786	C	T
intergenic	DDR1(dist=2338),GTF2H4(dist=5713)	6	30870271	30870271	rs117135413	0.326774	T	C
upstream	SFTA2(dist=452)	6	30900399	30900399	rs3998491	0.106674	G	C
intronic	MUCL3	6	30912337	30912337	rs2844703	0.461472	G	C
exonic	MUCL3	6	30919878	30919878	rs11970154	0.328018	C	G
ncRNA_intronic	HCG21	6	30920957	30920957	rs2240803	0.108513	A	G
intergenic	HCG21(dist=7994),MUC21(dist=20852)	6	30930633	30930633	rs9468851	0.105859	A	G
intergenic	HCG21(dist=9670),MUC21(dist=19176)	6	30932309	30932309	rs2844697	0.264789	T	C
intergenic	HCG21(dist=9893),MUC21(dist=18953)	6	30932532	30932532	rs3095150	0.117035	T	C
intergenic	HCG21(dist=10043),MUC21(dist=18803)	6	30932682	30932682	rs2532924	0.128742	C	T
intergenic	HCG21(dist=10758),MUC21(dist=18088)	6	30933397	30933397	rs17196137	0.0553629	A	C
intergenic	HCG21(dist=19482),MUC21(dist=9364)	6	30942121	30942121	rs114815710	0.463594	A	G
intergenic	HCG21(dist=22492),MUC21(dist=6354)	6	30945131	30945131	rs2530704	0.13543	T	C
intergenic	MUC21(dist=7006),MUC22(dist=9044)	6	30964685	30964685	rs118124047	0.463406	T	G
intergenic	MUC21(dist=12219),MUC22(dist=3831)	6	30969898	30969898	rs1632859	0.134677	A	G
intronic	MUC22	6	30979084	30979084	rs1634722	0.134713	T	C
intronic	MUC22	6	30980094	30980094	rs117374483	0.479897	T	C
intronic	MUC22	6	30986038	30986038	rs2894176	0.116505	C	G
intronic	MUC22	6	30986039	30986039	rs542409958	0.463603	T	C
intronic	MUC22	6	30988590	30988590	rs9262508	0.112311	G	A
intronic	MUC22	6	30989808	30989808	rs1632868	0.13251	C	G
intronic	MUC22	6	30990055	30990055	rs1634729	0.483268	T	C
intronic	MUC22	6	30993188	30993188	rs3909115	0.0475823	C	A
exonic	MUC22	6	30993533	30993533	rs2523898	0.136695	G	A
exonic	MUC22	6	30993590	30993590	rs12179536	0.129878	G	A
exonic	MUC22	6	30993958	30993958	rs2523897	0.107695	A	G
exonic	MUC22	6	30997816	30997816	rs12110470	0.120247	G	T
intronic	MUC22	6	31001467	31001467	rs10807077	0.121226	G	A
exonic	MUC22	6	31002616	31002616	rs4248154	0.157485	T	C
downstream	MUC22(dist=257)	6	31003436	31003436	rs2844683	0.116565	A	C
intergenic	MUC22(dist=7021),HCG22(dist=11027)	6	31010200	31010200	rs2508015	0.380245	A	G
intergenic	MUC22(dist=9761),HCG22(dist=8287)	6	31012940	31012940	rs6457311	0.141432	C	T
upstream	HCG22(dist=596)	6	31020631	31020631	rs4713425	0.133787	A	G
upstream	HCG22(dist=546)	6	31020681	31020681	rs4711254	0.12545	G	A
intronic	HCG22	6	31025361	31025361	rs2517525	0.144909	G	C
UTR3	HCG22(NM_001348249:c.*272A>G)	6	31027336	31027336	rs2517521	0.504954	A	G
intergenic	HCG22(dist=3726),C6orf15(dist=47619)	6	31031381	31031381	rs2256436	0.144877	G	A
intergenic	HCG22(dist=7979),C6orf15(dist=43366)	6	31035634	31035634	rs3130539	0.265649	G	C
intergenic	HCG22(dist=16276),C6orf15(dist=35069)	6	31043931	31043931	rs2517481	0.128956	G	C
intergenic	HCG22(dist=28703),C6orf15(dist=22642)	6	31056358	31056358	rs3130959	0.142842	G	A
intergenic	HCG22(dist=31807),C6orf15(dist=19538)	6	31059462	31059462	rs2535298	0.270465	G	A
intergenic	HCG22(dist=37172),C6orf15(dist=14173)	6	31064827	31064827	rs2517423	0.14329	T	C
intergenic	HCG22(dist=40765),C6orf15(dist=10580)	6	31068420	31068420	rs2535283	0.1433	G	A
intergenic	HCG22(dist=40870),C6orf15(dist=10475)	6	31068525	31068525	rs2517559	0.508304	A	C
intergenic	HCG22(dist=45392),C6orf15(dist=5953)	6	31073047	31073047	rs9263621	0.143255	G	A
intergenic	HCG22(dist=45942),C6orf15(dist=5403)	6	31073597	31073597	rs2517494	0.271883	C	G
upstream	C6orf15(dist=713)	6	31081065	31081065	rs2233959	0.127909	T	C
intergenic	C6orf15(dist=1057),PSORS1C1(dist=1168)	6	31081409	31081409	rs1265048	0.136612	C	T
upstream;downstream	PSORS1C1(dist=173);CDSN(dist=173)	6	31082404	31082404	rs3130980	0.138269	C	T
intronic	CDSN,PSORS1C1	6	31085701	31085701	rs3094213	0.12724	A	G
intronic	PSORS1C1	6	31089388	31089388	rs2239521	0.12728	C	G
intronic	PSORS1C1	6	31090052	31090052	rs140942506	0.464647	C	A
intronic	PSORS1C1	6	31092669	31092669	rs3131002	0.122384	A	G
intronic	PSORS1C1	6	31093370	31093370	rs3815091	0.399198	A	C
intronic	PSORS1C1	6	31093823	31093823	rs140984763	0.464811	C	G
intronic	PSORS1C1	6	31097301	31097301	rs3130559	0.114879	T	C
intronic	PSORS1C1	6	31097453	31097453	rs3130560	0.20545	T	G
intronic	PSORS1C1	6	31097897	31097897	rs147666549	0.464499	T	A
intronic	PSORS1C1	6	31102241	31102241	rs9468874	0.117883	G	A
intronic	PSORS1C1	6	31104956	31104956	rs9263724	0.195873	A	G
intronic	PSORS1C1,PSORS1C2	6	31106643	31106643	rs1265095	0.120009	A	G
exonic	CCHCR1	6	31113052	31113052	rs3094225	0.112697	G	A
exonic	CCHCR1	6	31113239	31113239	rs147733073	0.464206	G	C
intronic	CCHCR1	6	31113276	31113276	rs886400	0.119478	A	G
intronic	CCHCR1	6	31119589	31119589	rs1265109	0.164487	G	T
UTR3	TCF19(NM_007109:c.*99G>A,NM_001077511:c.*99G>A,NM_001318908:c.*99G>A)	6	31130593	31130593	rs1419881	0.166032	G	A
downstream	POU5F1,TCF19(dist=29)	6	31132085	31132085	rs3130933	0.508833	T	C
downstream	PSORS1C3(dist=980)	6	31140532	31140532	rs885948	0.130882	G	A
ncRNA_exonic	PSORS1C3	6	31141664	31141664	rs887467	0.120491	G	C
ncRNA_intronic	PSORS1C3	6	31142297	31142297	rs1265156	0.11275	A	C
ncRNA_intronic	PSORS1C3	6	31146722	31146722	rs62401299	0.239741	C	T
ncRNA_intronic	PSORS1C3	6	31146846	31146846	rs4713438	0.285117	A	G
ncRNA_intronic	PSORS1C3	6	31150435	31150435	rs1128175	0.188096	A	G
intergenic	PSORS1C3(dist=1445),HCG27(dist=9998)	6	31155539	31155539	rs4713443	0.171215	T	G
intergenic	PSORS1C3(dist=2512),HCG27(dist=8931)	6	31156606	31156606	rs4343960	0.252217	A	C
intergenic	PSORS1C3(dist=6826),HCG27(dist=4617)	6	31160920	31160920	rs3094613	0.255298	A	T
intergenic	PSORS1C3(dist=8426),HCG27(dist=3017)	6	31162520	31162520	rs7762933	0.171144	T	C
upstream	HCG27(dist=837)	6	31164700	31164700	rs3130461	0.255298	G	A
upstream	HCG27(dist=758)	6	31164779	31164779	rs28362333	0.171164	T	C
ncRNA_intronic	HCG27	6	31165843	31165843	rs114141192	0.368196	T	C
ncRNA_intronic	HCG27	6	31168029	31168029	rs6903896	0.240258	A	G
ncRNA_intronic	HCG27	6	31169477	31169477	rs150984561	0.368412	A	G
ncRNA_exonic	HCG27	6	31170608	31170608	rs9263872	0.167315	C	T
intergenic	HCG27(dist=1659),HLA-C(dist=63122)	6	31173404	31173404	rs184464159	0.434798	T	A
intergenic	HCG27(dist=1933),HLA-C(dist=62848)	6	31173678	31173678	rs3094606	0.242186	A	G
intergenic	HCG27(dist=6170),HLA-C(dist=58611)	6	31177915	31177915	rs3130952	0.242869	G	A
intergenic	HCG27(dist=6579),HLA-C(dist=58202)	6	31178324	31178324	rs9263928	0.110289	T	G
intergenic	HCG27(dist=8187),HLA-C(dist=56594)	6	31179932	31179932	rs3130466	0.242869	G	C
intergenic	HCG27(dist=8935),HLA-C(dist=55846)	6	31180680	31180680	rs9263947	0.110482	T	G
intergenic	HCG27(dist=9029),HLA-C(dist=55752)	6	31180774	31180774	rs114399250	0.369061	A	G
intergenic	HCG27(dist=14294),HLA-C(dist=50487)	6	31186039	31186039	rs9263964	0.11056	C	T
intergenic	HCG27(dist=15123),HLA-C(dist=49658)	6	31186868	31186868	rs3130951	0.242897	T	C
intergenic	HCG27(dist=16909),HLA-C(dist=47872)	6	31188654	31188654	rs28360997	0.386028	A	G
intergenic	HCG27(dist=21466),HLA-C(dist=43315)	6	31193211	31193211	rs4997405	0.157704	C	T
intergenic	HCG27(dist=28694),HLA-C(dist=36087)	6	31200439	31200439	rs117076796	0.401573	A	G
intergenic	HCG27(dist=29939),HLA-C(dist=34842)	6	31201684	31201684	rs9264086	0.113341	G	A
intergenic	HCG27(dist=35947),HLA-C(dist=28834)	6	31207692	31207692	rs3868082	0.157982	A	G
intergenic	HCG27(dist=37096),HLA-C(dist=27685)	6	31208841	31208841	rs77338145	0.240547	A	G
intergenic	HCG27(dist=39300),HLA-C(dist=25481)	6	31211045	31211045	rs117922333	0.401687	C	G
intergenic	HCG27(dist=39361),HLA-C(dist=25420)	6	31211106	31211106	rs80227257	0.240547	C	T
intergenic	HCG27(dist=41838),HLA-C(dist=22943)	6	31213583	31213583	rs2394898	0.144045	C	T
intergenic	HCG27(dist=44230),HLA-C(dist=20551)	6	31215975	31215975	rs115731335	0.240547	T	A
intergenic	HCG27(dist=44927),HLA-C(dist=19854)	6	31216672	31216672	rs3130415	0.295882	T	A
intergenic	HCG27(dist=46706),HLA-C(dist=18075)	6	31218451	31218451	rs74950488	0.240547	T	C
intergenic	HCG27(dist=48060),HLA-C(dist=16721)	6	31219805	31219805	rs3130435	0.140381	G	A
intergenic	HCG27(dist=49758),HLA-C(dist=15023)	6	31221503	31221503	rs1639113	0.385898	A	G
intergenic	HCG27(dist=49780),HLA-C(dist=15001)	6	31221525	31221525	rs2394948	0.144002	C	G
intergenic	HCG27(dist=54396),HLA-C(dist=10385)	6	31226141	31226141	rs12525881	0.0479164	A	C
intergenic	HCG27(dist=56533),HLA-C(dist=8248)	6	31228278	31228278	rs7773935	0.136865	A	G
intergenic	HCG27(dist=56535),HLA-C(dist=8246)	6	31228280	31228280	rs9264360	0.385997	T	A
intergenic	HCG27(dist=57593),HLA-C(dist=7188)	6	31229338	31229338	rs9366772	0.0479833	A	G
intergenic	HCG27(dist=58972),HLA-C(dist=5809)	6	31230717	31230717	rs9357120	0.179382	T	A
intergenic	HCG27(dist=59943),HLA-C(dist=4838)	6	31231688	31231688	rs9264466	0.2247	T	C
intergenic	HCG27(dist=60202),HLA-C(dist=4579)	6	31231947	31231947	rs2524110	0.115906	A	G
intergenic	HCG27(dist=60798),HLA-C(dist=3983)	6	31232543	31232543	rs2844623	0.207827	T	C
intergenic	HCG27(dist=61079),HLA-C(dist=3702)	6	31232824	31232824	rs2524106	0.180578	A	G
intergenic	HCG27(dist=61787),HLA-C(dist=2994)	6	31233532	31233532	rs2894203	0.139647	G	A
intergenic	HCG27(dist=62636),HLA-C(dist=2145)	6	31234381	31234381	rs9264532	0.124138	C	T
downstream	HLA-C(dist=351)	6	31236175	31236175	rs2853950	0.120315	T	C
downstream	HLA-C(dist=59)	6	31236467	31236467	rs2524096	0.125364	G	T
intronic	HLA-C	6	31237061	31237061	rs2894204	0.192403	C	T
intronic	HLA-C	6	31237965	31237965	rs17886232	0.182628	G	C
exonic	HLA-C	6	31238930	31238930	rs2308592	0.132379	C	A
intronic	HLA-C	6	31239305	31239305	rs17879195	0.114778	T	C
exonic	HLA-C	6	31239593	31239593	rs41542719	0.128998	C	T
intronic	HLA-C	6	31239761	31239761	rs41550615	0.244129	T	C
upstream	HLA-C(dist=779)	6	31240692	31240692	rs2395471	0.125065	G	A
intergenic	HLA-C(dist=1726),LINC02571(dist=20046)	6	31241639	31241639	rs2524084	0.154151	A	G
intergenic	HLA-C(dist=2596),LINC02571(dist=19176)	6	31242509	31242509	rs35989257	0.122996	T	C
intergenic	HLA-C(dist=4067),LINC02571(dist=17705)	6	31243980	31243980	rs186417769	0.458872	T	C
intergenic	HLA-C(dist=4418),LINC02571(dist=17354)	6	31244331	31244331	rs9264740	0.237921	C	T
intergenic	HLA-C(dist=7368),LINC02571(dist=14404)	6	31247281	31247281	rs7454812	0.277271	G	T
intergenic	HLA-C(dist=7501),LINC02571(dist=14271)	6	31247414	31247414	rs2844608	0.121175	C	T
intergenic	HLA-C(dist=9504),LINC02571(dist=12268)	6	31249417	31249417	rs79738939	0.244022	C	A
intergenic	HLA-C(dist=9680),LINC02571(dist=12092)	6	31249593	31249593	rs7766089	0.125503	G	A
intergenic	HLA-C(dist=9819),LINC02571(dist=11953)	6	31249732	31249732	rs2853940	0.115111	C	T
intergenic	HLA-C(dist=10888),LINC02571(dist=10884)	6	31250801	31250801	rs9468915	0.14676	C	A
intergenic	HLA-C(dist=11847),LINC02571(dist=9925)	6	31251760	31251760	rs76737289	0.2441	T	C
intergenic	HLA-C(dist=11875),LINC02571(dist=9897)	6	31251788	31251788	rs117477942	0.402394	T	G
intergenic	HLA-C(dist=11928),LINC02571(dist=9844)	6	31251841	31251841	rs117652729	0.503922	A	G
intergenic	HLA-C(dist=13965),LINC02571(dist=7807)	6	31253878	31253878	rs2853935	0.239746	C	T
intergenic	HLA-C(dist=14350),LINC02571(dist=7422)	6	31254263	31254263	rs7754443	0.1468	A	G
intergenic	HLA-C(dist=15273),LINC02571(dist=6499)	6	31255186	31255186	rs118094249	0.402468	C	A
intergenic	HLA-C(dist=15666),LINC02571(dist=6106)	6	31255579	31255579	rs75584970	0.244074	A	G
intergenic	HLA-C(dist=17035),LINC02571(dist=4737)	6	31256948	31256948	rs9468924	0.503922	A	G
intergenic	HLA-C(dist=17712),LINC02571(dist=4060)	6	31257625	31257625	rs2524040	0.239783	T	C
intergenic	HLA-C(dist=17805),LINC02571(dist=3967)	6	31257718	31257718	rs77546204	0.244074	A	G
intergenic	HLA-C(dist=19055),LINC02571(dist=2717)	6	31258968	31258968	rs3906269	0.146802	A	G
intergenic	HLA-C(dist=19837),LINC02571(dist=1935)	6	31259750	31259750	rs2524162	0.147577	T	C
intergenic	HLA-C(dist=19885),LINC02571(dist=1887)	6	31259798	31259798	rs2524161	0.239783	C	G
downstream	LINC02571(dist=601)	6	31261084	31261084	rs3906276	0.146769	A	T
ncRNA_exonic	LINC02571	6	31262727	31262727	rs76343304	0.141276	T	C
ncRNA_intronic	LINC02571	6	31262924	31262924	rs3906272	0.273071	T	C
ncRNA_intronic	LINC02571	6	31263051	31263051	rs2853926	0.0560755	G	A
ncRNA_intronic	LINC02571	6	31263657	31263657	rs3909124	0.14669	T	G
ncRNA_intronic	LINC02571	6	31264598	31264598	rs28732117	0.273071	G	A
ncRNA_intronic	LINC02571	6	31266117	31266117	rs2524095	0.239813	A	C
ncRNA_intronic	LINC02571	6	31266777	31266777	rs4543368	0.146627	A	G
ncRNA_intronic	LINC02571	6	31267059	31267059	rs117446653	0.240878	T	C
ncRNA_intronic	LINC02571	6	31267422	31267422	rs2524060	0.234786	A	C
ncRNA_intronic	LINC02571	6	31267812	31267812	rs28367627	0.146627	G	A
ncRNA_intronic	LINC02571	6	31268372	31268372	rs118013216	0.401942	T	G
ncRNA_intronic	LINC02571	6	31269029	31269029	rs9468934	0.273236	A	G
upstream	LINC02571(dist=460)	6	31269874	31269874	rs1960278	0.239777	C	G
upstream	LINC02571(dist=572)	6	31269986	31269986	rs9257063	0.139701	T	C
intergenic	LINC02571(dist=1037),HLA-B(dist=51201)	6	31270451	31270451	rs9264803	0.0560516	T	C
intergenic	LINC02571(dist=1116),HLA-B(dist=51122)	6	31270530	31270530	rs9264804	0.141673	A	G
intergenic	LINC02571(dist=1594),HLA-B(dist=50644)	6	31271008	31271008	rs13200073	0.273236	T	C
intergenic	LINC02571(dist=1802),HLA-B(dist=50436)	6	31271216	31271216	rs7750854	0.130418	T	G
intergenic	LINC02571(dist=2286),HLA-B(dist=49952)	6	31271700	31271700	rs9264873	0.239041	T	C
intergenic	LINC02571(dist=2522),HLA-B(dist=49716)	6	31271936	31271936	rs7751729	0.273236	T	C
intergenic	LINC02571(dist=3198),HLA-B(dist=49040)	6	31272612	31272612	rs6457375	0.125086	G	A
intergenic	LINC02571(dist=5027),HLA-B(dist=47211)	6	31274441	31274441	rs9468942	0.471858	A	G
intergenic	LINC02571(dist=5205),HLA-B(dist=47033)	6	31274619	31274619	rs9264944	0.14538	A	G
intergenic	LINC02571(dist=5279),HLA-B(dist=46959)	6	31274693	31274693	rs3094691	0.111765	A	G
intergenic	LINC02571(dist=30268),HLA-B(dist=21970)	6	31299682	31299682	rs9265619	0.125035	A	G
intergenic	LINC02571(dist=40888),HLA-B(dist=11350)	6	31310302	31310302	rs9265810	0.124427	A	G
intergenic	LINC02571(dist=42644),HLA-B(dist=9594)	6	31312058	31312058	rs2394977	0.1209	G	C
intergenic	LINC02571(dist=43023),HLA-B(dist=9215)	6	31312437	31312437	rs4260781	0.128487	T	C
intergenic	LINC02571(dist=44188),HLA-B(dist=8050)	6	31313602	31313602	rs9265906	0.171851	C	A
intergenic	LINC02571(dist=44881),HLA-B(dist=7357)	6	31314295	31314295	rs9265926	0.206636	C	G
intergenic	LINC02571(dist=45856),HLA-B(dist=6382)	6	31315270	31315270	rs9265951	0.116473	C	T
intergenic	LINC02571(dist=46665),HLA-B(dist=5573)	6	31316079	31316079	rs9265981	0.123279	C	A
intergenic	LINC02571(dist=47236),HLA-B(dist=5002)	6	31316650	31316650	rs9265999	0.126548	C	G
intergenic	LINC02571(dist=47345),HLA-B(dist=4893)	6	31316759	31316759	rs2596518	0.179647	G	A
intergenic	LINC02571(dist=48971),HLA-B(dist=3267)	6	31318385	31318385	rs2442731	0.124672	A	G
intergenic	LINC02571(dist=49808),HLA-B(dist=2430)	6	31319222	31319222	rs9266059	0.154496	T	C
intergenic	LINC02571(dist=49941),HLA-B(dist=2297)	6	31319355	31319355	rs2442728	0.128459	G	T
intergenic	LINC02571(dist=50075),HLA-B(dist=2163)	6	31319489	31319489	rs9405083	0.170511	T	C
intergenic	LINC02571(dist=50340),HLA-B(dist=1898)	6	31319754	31319754	rs9266075	0.119598	T	G
intergenic	LINC02571(dist=50895),HLA-B(dist=1343)	6	31320309	31320309	rs2507993	0.121506	T	C
downstream	HLA-B(dist=620)	6	31321032	31321032	rs2596502	0.0857843	G	A
downstream	HLA-B(dist=468)	6	31321184	31321184	rs72866766	0.0620644	C	T
downstream	HLA-B(dist=384)	6	31321268	31321268	rs9266094	0.113099	G	T
downstream	HLA-B(dist=245)	6	31321407	31321407	rs12196740	0.0878342	T	C
downstream	HLA-B(dist=14)	6	31321638	31321638	rs12198288	0.461141	A	G
UTR3	HLA-B(NM_005514:c.*271C>T)	6	31321807	31321807	rs2770	0.220687	G	A
intronic	HLA-B	6	31322133	31322133	rs3819306	0.124698	A	G
intronic	HLA-B	6	31322229	31322229	rs3819301	0.116645	G	A
intronic	HLA-B	6	31322513	31322513	rs2507991	0.171619	A	C
exonic	HLA-B	6	31323233	31323233	rs709052	0.138104	G	A
exonic	HLA-B	6	31323321	31323321	rs1050723	0.4297	A	G
intronic	HLA-B	6	31323745	31323745	rs17881233	0.465256	A	C
exonic	HLA-B	6	31324077	31324077	rs709053	0.145776	G	C
exonic	HLA-B	6	31324194	31324194	rs3179865	0.115294	G	A
exonic	HLA-B	6	31324643	31324643	rs1050517	0.120828	C	G
exonic	HLA-B	6	31324705	31324705	rs1131170	0.116136	A	C
upstream	HLA-B(dist=237)	6	31325193	31325193	rs9266225	0.123058	C	T
upstream	HLA-B(dist=403)	6	31325359	31325359	rs144492758	0.465256	T	C
intergenic	HLA-B(dist=1175),MICA-AS1(dist=35935)	6	31326131	31326131	rs73390208	0.114047	T	C
intergenic	HLA-B(dist=1190),MICA-AS1(dist=35920)	6	31326146	31326146	rs71563319	0.465256	G	C
intergenic	HLA-B(dist=1295),MICA-AS1(dist=35815)	6	31326251	31326251	rs9405084	0.122948	C	T
intergenic	HLA-B(dist=1316),MICA-AS1(dist=35794)	6	31326272	31326272	rs9266276	0.126973	G	A
intergenic	HLA-B(dist=2261),MICA-AS1(dist=34849)	6	31327217	31327217	rs2394987	0.0915509	A	C
intergenic	HLA-B(dist=2443),MICA-AS1(dist=34667)	6	31327399	31327399	rs71563321	0.465256	C	A
intergenic	HLA-B(dist=2548),MICA-AS1(dist=34562)	6	31327504	31327504	rs2523585	0.210472	T	C
intergenic	HLA-B(dist=3930),MICA-AS1(dist=33180)	6	31328886	31328886	rs7772305	0.131101	G	A
intergenic	HLA-B(dist=4001),MICA-AS1(dist=33109)	6	31328957	31328957	rs116280898	0.0973329	C	G
intergenic	HLA-B(dist=4346),MICA-AS1(dist=32764)	6	31329302	31329302	rs2428492	0.137684	T	C
intergenic	HLA-B(dist=4550),MICA-AS1(dist=32560)	6	31329506	31329506	rs9266301	0.14733	C	T
intergenic	HLA-B(dist=4645),MICA-AS1(dist=32465)	6	31329601	31329601	rs9266302	0.137403	A	C
intergenic	HLA-B(dist=5378),MICA-AS1(dist=31732)	6	31330334	31330334	rs2250292	0.120539	A	T
intergenic	HLA-B(dist=6544),MICA-AS1(dist=30566)	6	31331500	31331500	rs4959062	0.305301	C	G
intergenic	HLA-B(dist=6751),MICA-AS1(dist=30359)	6	31331707	31331707	rs115408991	0.561871	C	T
intergenic	HLA-B(dist=7571),MICA-AS1(dist=29539)	6	31332527	31332527	rs2523548	0.120958	A	G
intergenic	HLA-B(dist=8983),MICA-AS1(dist=28127)	6	31333939	31333939	rs7761068	0.305301	A	G
intergenic	HLA-B(dist=9989),MICA-AS1(dist=27121)	6	31334945	31334945	rs2844575	0.134408	T	C
intergenic	HLA-B(dist=11138),MICA-AS1(dist=25972)	6	31336094	31336094	rs115282162	0.561871	G	C
intergenic	HLA-B(dist=11856),MICA-AS1(dist=25254)	6	31336812	31336812	rs2853991	0.495735	A	G
intergenic	HLA-B(dist=12475),MICA-AS1(dist=24635)	6	31337431	31337431	rs2922998	0.135543	A	T
intergenic	HLA-B(dist=13012),MICA-AS1(dist=24098)	6	31337968	31337968	rs115919658	0.561871	A	G
intergenic	HLA-B(dist=13572),MICA-AS1(dist=23538)	6	31338528	31338528	rs9295986	0.121273	T	C
intergenic	HLA-B(dist=14378),MICA-AS1(dist=22732)	6	31339334	31339334	rs2523527	0.452932	G	T
intergenic	HLA-B(dist=14852),MICA-AS1(dist=22258)	6	31339808	31339808	rs114174160	0.561871	C	T
intergenic	HLA-B(dist=16094),MICA-AS1(dist=21016)	6	31341050	31341050	rs2394991	0.453911	G	T
intergenic	HLA-B(dist=16962),MICA-AS1(dist=20148)	6	31341918	31341918	rs9266538	0.296926	T	C
intergenic	HLA-B(dist=17137),MICA-AS1(dist=19973)	6	31342093	31342093	rs3094602	0.456423	A	G
intergenic	HLA-B(dist=17181),MICA-AS1(dist=19929)	6	31342137	31342137	rs3997902	0.13344	T	C
intergenic	HLA-B(dist=17560),MICA-AS1(dist=19550)	6	31342516	31342516	rs116352528	0.561871	C	T
intergenic	HLA-B(dist=18391),MICA-AS1(dist=18719)	6	31343347	31343347	rs4959066	0.33083	G	A
intergenic	HLA-B(dist=19895),MICA-AS1(dist=17215)	6	31344851	31344851	rs28430917	0.0976198	T	C
intergenic	HLA-B(dist=19901),MICA-AS1(dist=17209)	6	31344857	31344857	rs9266600	0.156037	A	C
intergenic	HLA-B(dist=19920),MICA-AS1(dist=17190)	6	31344876	31344876	rs2523634	0.128143	A	G
intergenic	HLA-B(dist=21643),MICA-AS1(dist=15467)	6	31346599	31346599	rs6909636	0.128149	G	A
intergenic	HLA-B(dist=21746),MICA-AS1(dist=15364)	6	31346702	31346702	rs114738037	0.561871	A	T
intergenic	HLA-B(dist=22495),MICA-AS1(dist=14615)	6	31347451	31347451	rs2244020	0.134212	G	A
intergenic	HLA-B(dist=22842),MICA-AS1(dist=14268)	6	31347798	31347798	rs4713460	0.131832	G	A
intergenic	HLA-B(dist=23244),MICA-AS1(dist=13866)	6	31348200	31348200	rs4143334	0.0644022	G	A
intergenic	HLA-B(dist=23877),MICA-AS1(dist=13233)	6	31348833	31348833	rs9266696	0.174075	A	T
intergenic	HLA-B(dist=24261),MICA-AS1(dist=12849)	6	31349217	31349217	rs9266705	0.441362	T	C
intergenic	HLA-B(dist=24853),MICA-AS1(dist=12257)	6	31349809	31349809	rs9266720	0.107991	G	A
intergenic	HLA-B(dist=25024),MICA-AS1(dist=12086)	6	31349980	31349980	rs115901473	0.561871	T	C
intergenic	HLA-B(dist=26582),MICA-AS1(dist=10528)	6	31351538	31351538	rs116111301	0.56304	A	C
intergenic	HLA-B(dist=26652),MICA-AS1(dist=10458)	6	31351608	31351608	rs3128985	0.197939	C	T
intergenic	HLA-B(dist=27035),MICA-AS1(dist=10075)	6	31351991	31351991	rs2442751	0.173077	G	A
intergenic	HLA-B(dist=27157),MICA-AS1(dist=9953)	6	31352113	31352113	rs9266772	0.162387	C	T
intergenic	HLA-B(dist=28683),MICA-AS1(dist=8427)	6	31353639	31353639	rs2523484	0.123413	T	C
intergenic	HLA-B(dist=28978),MICA-AS1(dist=8132)	6	31353934	31353934	rs1939365	0.456687	A	G
intergenic	HLA-B(dist=29374),MICA-AS1(dist=7736)	6	31354330	31354330	rs115588141	0.189525	A	G
intergenic	HLA-B(dist=30746),MICA-AS1(dist=6364)	6	31355702	31355702	rs2523480	0.517172	G	C
intergenic	HLA-B(dist=31618),MICA-AS1(dist=5492)	6	31356574	31356574	rs2853969	0.456687	A	G
intergenic	HLA-B(dist=32457),MICA-AS1(dist=4653)	6	31357413	31357413	rs201217684	0.189525	A	G
intergenic	HLA-B(dist=33589),MICA-AS1(dist=3521)	6	31358545	31358545	rs6929845	0.126491	C	T
intergenic	HLA-B(dist=33793),MICA-AS1(dist=3317)	6	31358749	31358749	rs2442734	0.106302	T	C
intergenic	HLA-B(dist=35139),MICA-AS1(dist=1971)	6	31360095	31360095	rs2596517	0.495717	G	A
intergenic	HLA-B(dist=35433),MICA-AS1(dist=1677)	6	31360389	31360389	rs2523477	0.456687	C	T
intergenic	HLA-B(dist=35856),MICA-AS1(dist=1254)	6	31360812	31360812	rs184663538	0.56304	G	T
downstream	MICA-AS1(dist=212)	6	31361854	31361854	rs2523474	0.123979	T	A
ncRNA_intronic	MICA-AS1	6	31364832	31364832	rs28366143	0.171048	A	C
ncRNA_exonic	HCG26	6	31439623	31439623	rs147619139	0.490686	G	A
intergenic	HCG26(dist=5160),MICB-DT(dist=2350)	6	31445345	31445345	rs2596534	0.126264	C	T
ncRNA_intronic	MICB-DT	6	31449213	31449213	rs7757420	0.363032	T	A
ncRNA_intronic	MICB-DT	6	31449555	31449555	rs185482837	0.490686	T	G
ncRNA_intronic	MICB-DT	6	31453236	31453236	rs144543591	0.211411	G	A
ncRNA_intronic	MICB-DT	6	31454178	31454178	rs3906255	0.0636744	C	T
ncRNA_intronic	MICB-DT	6	31456074	31456074	rs28634511	0.127086	T	C
ncRNA_intronic	MICB-DT	6	31457484	31457484	rs150971914	0.450632	T	C
ncRNA_intronic	MICB-DT	6	31458508	31458508	rs9267293	0.359594	G	C
ncRNA_intronic	MICB-DT	6	31458993	31458993	rs2395490	0.17856	A	G
ncRNA_exonic	MICB-DT	6	31462031	31462031	rs2253052	0.114893	T	C
intronic	MICB	6	31463718	31463718	rs3828901	0.447876	A	G
intronic	MICB	6	31463926	31463926	rs6916187	0.127658	T	C
intronic	MICB	6	31464439	31464439	rs9469017	0.489035	A	G
intronic	MICB	6	31468754	31468754	rs9267390	0.127636	A	G
intronic	MICB	6	31468818	31468818	rs140311576	0.489035	C	T
intronic	MICB	6	31472865	31472865	rs2534655	0.122835	A	G
intronic	MICB	6	31473247	31473247	rs115935870	0.489035	T	C
intronic	MICB	6	31475624	31475624	rs374353214	0.446396	C	G
intergenic	MICB(dist=1311),MCCD1(dist=16527)	6	31480212	31480212	rs115707901	0.489255	C	T
intergenic	MICB(dist=4235),MCCD1(dist=13603)	6	31483136	31483136	rs2844495	0.144639	G	A
intergenic	MICB(dist=4305),MCCD1(dist=13533)	6	31483206	31483206	rs62397979	0.446522	G	T
intergenic	MICB(dist=6273),MCCD1(dist=11565)	6	31485174	31485174	rs3093998	0.225949	C	A
intergenic	MICB(dist=14987),MCCD1(dist=2851)	6	31493888	31493888	rs2734574	0.120491	T	A
intergenic	MICB(dist=15837),MCCD1(dist=2001)	6	31494738	31494738	rs2734573	0.161057	C	A
ncRNA_intronic	ATP6V1G2-DDX39B	6	31499603	31499603	rs3853601	0.446424	G	C
ncRNA_intronic	ATP6V1G2-DDX39B	6	31502079	31502079	rs141345968	0.573394	A	C
ncRNA_intronic	ATP6V1G2-DDX39B	6	31509284	31509284	rs3130059	0.122537	C	G
ncRNA_intronic	ATP6V1G2-DDX39B	6	31510935	31510935	rs3130629	0.245938	A	C
intronic	NFKBIL1	6	31523684	31523684	rs3130061	0.279203	C	A
intronic	NFKBIL1	6	31525319	31525319	rs2239707	0.173484	C	T
downstream	LOC100287329,NFKBIL1(dist=635)	6	31526713	31526713	rs116072478	0.445394	A	C
ncRNA_intronic	LOC100287329	6	31531093	31531093	rs148356194	0.573952	C	T
ncRNA_intronic	LOC100287329	6	31535455	31535455	rs12174951	0.137938	G	A
upstream	LTB(dist=864)	6	31551066	31551066	rs769174	0.442527	G	C
intronic	LST1	6	31554347	31554347	rs185288699	0.587646	T	C
intergenic	NCR3(dist=6639),AIF1(dist=15589)	6	31567422	31567422	rs2857596	0.358306	G	T
intergenic	NCR3(dist=9118),AIF1(dist=13110)	6	31569901	31569901	rs9267516	0.167931	T	C
intergenic	NCR3(dist=12173),AIF1(dist=10055)	6	31572956	31572956	rs2844479	0.123041	C	A
exonic	PRRC2A	6	31604010	31604010	rs13716	0.125234	G	C
UTR3	GPANK1(NM_033177:c.*719G>T,NM_001199237:c.*719G>T,NM_001199239:c.*719G>T,NM_001199240:c.*719G>T,NM_001199238:c.*719G>T)	6	31629324	31629324	rs143479464	0.432214	C	A
UTR3	GPANK1(NM_033177:c.*544C>T,NM_001199237:c.*544C>T,NM_001199239:c.*544C>T,NM_001199240:c.*544C>T,NM_001199238:c.*544C>T)	6	31629499	31629499	rs707974	0.435933	G	A
UTR3	CSNK2B(NM_001320:c.*31T>A,NM_001282385:c.*31T>A)	6	31637734	31637734	rs5872	0.12537	T	A
intronic	LY6G5C	6	31647793	31647793	rs147973731	0.389995	T	C
intronic	ABHD16A	6	31669496	31669496	rs1266071	0.436096	T	C
intronic	LY6G6C	6	31688518	31688518	rs805293	0.117915	T	A
intronic	LY6G6C	6	31688799	31688799	rs4713479	0.0958639	T	C
upstream	MSH5,MSH5-SAPCD1(dist=875)	6	31706850	31706850	rs2736154	0.144278	T	A
upstream	MSH5,MSH5-SAPCD1(dist=873)	6	31706852	31706852	rs396369	0.120946	A	T
ncRNA_intronic	MSH5-SAPCD1	6	31718777	31718777	rs28399970	0.490264	A	T
ncRNA_intronic	MSH5-SAPCD1	6	31719141	31719141	rs182526159	0.585942	A	G
ncRNA_intronic	MSH5-SAPCD1	6	31726688	31726688	rs707939	0.121162	A	C
intronic	VWA7	6	31738343	31738343	rs707932	0.0909798	T	C
upstream;downstream	VWA7(dist=179);VARS1(dist=12)	6	31745284	31745284	rs2736426	0.116064	C	T
intronic	VARS1	6	31746548	31746548	rs909267	0.373413	C	T
intronic	HSPA1L	6	31779953	31779953	rs118191775	0.394619	T	C
intergenic	HSPA1A(dist=1153),HSPA1B(dist=8643)	6	31786872	31786872	rs2844459	0.118933	A	G
intergenic	HSPA1B(dist=2403),SNHG32(dist=2259)	6	31800434	31800434	rs145611070	0.134479	A	C
intergenic	HSPA1B(dist=3313),SNHG32(dist=1349)	6	31801344	31801344	rs611902	0.204445	A	G
intergenic	SNHG32(dist=4026),NEU1(dist=13873)	6	31811563	31811563	rs3130479	0.458817	A	G
UTR3	NEU1(NM_000434:c.*1343C>T)	6	31826153	31826153	rs2445689	0.118337	G	A
UTR3	NEU1(NM_000434:c.*791T>C)	6	31826705	31826705	rs622076	0.41305	A	G
UTR5	NEU1(NM_000434:c.-40G>T)	6	31830593	31830593	rs41267082	0.139216	C	A
intronic	SLC44A4	6	31843924	31843924	rs2736428	0.121918	T	C
UTR3	EHMT2(NM_001363689:c.*225T>C,NM_001318833:c.*225T>C,NM_025256:c.*225T>C,NM_006709:c.*225T>C,NM_001289413:c.*225T>C)	6	31847636	31847636	rs41267086	0.1029	A	G
intronic	EHMT2	6	31850973	31850973	rs189984590	0.592417	A	G
intronic	EHMT2	6	31859578	31859578	rs13194087	0.343862	A	G
UTR5	ZBTB12(NM_181842:c.-591G>A)	6	31869673	31869673	rs2844455	0.116996	C	T
ncRNA_intronic	C2-AS1	6	31906828	31906828	rs78593564	0.172525	A	G
exonic	CFB	6	31914179	31914179	rs12614	0.354146	T	C
intronic	CFB	6	31919578	31919578	rs2072633	0.13289	A	G
intronic	SKIV2L	6	31927342	31927342	rs440454	0.111229	A	G
exonic	SKIV2L	6	31930351	31930351	rs2734331	0.139167	G	A
intronic	DXO	6	31938107	31938107	rs474534	0.277314	G	A
ncRNA_intronic	CYP21A1P	6	31975839	31975839	rs2242571	0.0659962	G	A
ncRNA_exonic	CYP21A1P,TNXA	6	31976228	31976228	rs182239097	0.172124	T	C
exonic	TNXB	6	31977998	31977998	rs149101418	0.113547	G	T
ncRNA_intronic	TNXA	6	31978746	31978746	rs28361039	0.107496	G	A
upstream	CYP21A2(dist=728)	6	32005355	32005355	rs113720465	0.457567	A	G
exonic	CYP21A2	6	32007790	32007790	rs6477	0.0982958	G	C
UTR3	CYP21A2(NM_001368144:c.*52C>T,NM_001368143:c.*52C>T,NM_001128590:c.*52C>T,NM_000500:c.*52C>T),TNXB(NM_019105:c.*163G>A,NM_001365276:c.*163G>A,NM_032470:c.*163G>A)	6	32008963	32008963	rs1058152	0.110673	C	T
exonic	TNXB	6	32011235	32011235	rs2856453	0.123119	T	C
intronic	TNXB	6	32011714	32011714	rs397948	0.0749137	G	A
exonic	TNXB	6	32012279	32012279	rs374698	0.356917	T	C
intronic	TNXB	6	32022147	32022147	rs150622545	0.175897	G	A
exonic	TNXB	6	32032743	32032743	rs204883	0.108409	A	G
intronic	TNXB	6	32041043	32041043	rs11751545	0.405081	C	A
intronic	TNXB	6	32042322	32042322	rs3130286	0.237784	T	C
intronic	TNXB	6	32071017	32071017	rs3117181	0.264601	C	G
intronic	TNXB	6	32075563	32075563	rs429150	0.111149	C	T
intronic	TNXB	6	32076499	32076499	rs2269426	0.113736	A	G
intergenic	TNXB(dist=2452),ATF6B(dist=3474)	6	32079567	32079567	rs17207986	0.151948	C	T
intergenic	FKBPL(dist=11914),PRRT1(dist=6157)	6	32109979	32109979	rs204999	0.382172	G	A
intronic	PRRT1	6	32119960	32119960	rs548568008	0.590658	G	A
exonic	PPT2	6	32122386	32122386	rs3134604	0.338887	C	G
ncRNA_intronic	PPT2-EGFL8	6	32127477	32127477	rs3134950	0.111139	C	A
UTR3	PBX2(NM_002586:c.*750T>G)	6	32153409	32153409	rs1004095	0.125414	A	C
intronic	PBX2	6	32154285	32154285	rs204995	0.112715	G	A
intronic	PBX2	6	32155581	32155581	rs204993	0.102296	G	A
intronic	NOTCH4	6	32171683	32171683	rs2071277	0.114994	C	T
intronic	NOTCH4	6	32174957	32174957	rs3130290	0.0666025	T	C
intronic	NOTCH4	6	32176782	32176782	rs3132947	0.191527	T	G
intronic	NOTCH4	6	32184345	32184345	rs404860	0.123945	T	C
intronic	NOTCH4	6	32190620	32190620	rs3134931	0.104129	T	C
intronic	NOTCH4	6	32191041	32191041	rs434841	0.0891164	A	G
UTR5	NOTCH4(NM_004557:c.-25T>C)	6	32191730	32191730	rs367398	0.0987384	A	G
intergenic	NOTCH4(dist=3906),TSBP1-AS1(dist=27200)	6	32195750	32195750	rs409687	0.124225	C	T
intergenic	NOTCH4(dist=7104),TSBP1-AS1(dist=24002)	6	32198948	32198948	rs6457499	0.124642	C	T
intergenic	NOTCH4(dist=7300),TSBP1-AS1(dist=23806)	6	32199144	32199144	rs377763	0.251055	A	C
intergenic	NOTCH4(dist=12173),TSBP1-AS1(dist=18933)	6	32204017	32204017	rs143821594	0.583695	C	T
intergenic	NOTCH4(dist=13108),TSBP1-AS1(dist=17998)	6	32204952	32204952	rs9267908	0.122729	A	G
intergenic	NOTCH4(dist=14555),TSBP1-AS1(dist=16551)	6	32206399	32206399	rs6906174	0.0615611	T	A
intergenic	NOTCH4(dist=21141),TSBP1-AS1(dist=9965)	6	32212985	32212985	rs17576984	0.0534875	T	C
intergenic	NOTCH4(dist=21944),TSBP1-AS1(dist=9162)	6	32213788	32213788	rs440169	0.109353	A	G
intergenic	NOTCH4(dist=25609),TSBP1-AS1(dist=5497)	6	32217453	32217453	rs3130313	0.109421	G	A
intergenic	NOTCH4(dist=29708),TSBP1-AS1(dist=1398)	6	32221552	32221552	rs9267995	0.195778	G	A
upstream	TSBP1-AS1(dist=21)	6	32222929	32222929	rs184469715	0.583734	C	G
ncRNA_exonic	TSBP1-AS1	6	32223022	32223022	rs2021889	0.133512	T	C
ncRNA_intronic	TSBP1-AS1	6	32226471	32226471	rs9268025	0.160564	G	A
ncRNA_intronic	TSBP1-AS1	6	32229572	32229572	rs9268043	0.133029	T	C
ncRNA_intronic	TSBP1-AS1	6	32231014	32231014	rs4959091	0.086022	A	G
ncRNA_intronic	TSBP1-AS1	6	32231313	32231313	rs3132926	0.160564	C	T
ncRNA_intronic	TSBP1-AS1	6	32234412	32234412	rs9268081	0.133001	G	A
ncRNA_intronic	TSBP1-AS1	6	32240875	32240875	rs4713515	0.126115	G	A
ncRNA_intronic	TSBP1-AS1	6	32253884	32253884	rs9268128	0.133119	C	T
ncRNA_intronic	TSBP1-AS1	6	32255000	32255000	rs9268134	0.189275	G	T
ncRNA_intronic	TSBP1-AS1	6	32268501	32268501	rs537757	0.0673655	T	A
ncRNA_intronic	TSBP1-AS1	6	32269359	32269359	rs9268157	0.133708	G	T
ncRNA_intronic	TSBP1-AS1	6	32271450	32271450	rs491870	0.145005	A	T
ncRNA_intronic	TSBP1-AS1	6	32272156	32272156	rs56036302	0.058356	T	A
ncRNA_intronic	TSBP1-AS1	6	32276169	32276169	rs540926	0.0672791	G	A
ncRNA_intronic	TSBP1-AS1	6	32276275	32276275	rs28366178	0.148438	C	T
ncRNA_intronic	TSBP1-AS1	6	32278792	32278792	rs3864302	0.120205	T	C
ncRNA_intronic	TSBP1-AS1	6	32280774	32280774	rs117627796	0.58316	G	A
ncRNA_intronic	TSBP1-AS1	6	32285248	32285248	rs543928	0.12558	G	A
ncRNA_intronic	TSBP1-AS1	6	32285879	32285879	rs538473	0.133327	A	G
ncRNA_intronic	TSBP1-AS1	6	32293255	32293255	rs511874	0.13495	C	G
ncRNA_intronic	TSBP1-AS1	6	32295367	32295367	rs117123773	0.390059	G	A
ncRNA_intronic	TSBP1-AS1	6	32295744	32295744	rs9268249	0.110477	A	T
ncRNA_intronic	TSBP1-AS1	6	32297374	32297374	rs117501820	0.58316	A	T
ncRNA_intronic	TSBP1-AS1	6	32300638	32300638	rs1474727	0.122123	C	T
ncRNA_intronic	TSBP1-AS1	6	32304085	32304085	rs12526151	0.145254	G	A
ncRNA_intronic	TSBP1-AS1	6	32305658	32305658	rs926592	0.260243	A	C
ncRNA_intronic	TSBP1-AS1	6	32306559	32306559	rs9968795	0.228993	T	C
ncRNA_intronic	TSBP1-AS1	6	32308908	32308908	rs9469099	0.0816044	A	G
ncRNA_intronic	TSBP1-AS1	6	32310811	32310811	rs3117136	0.122102	A	C
ncRNA_intronic	TSBP1-AS1	6	32313512	32313512	rs116111528	0.228904	T	C
ncRNA_intronic	TSBP1-AS1	6	32314877	32314877	rs3117130	0.12458	A	G
ncRNA_intronic	TSBP1-AS1	6	32316312	32316312	rs969892	0.260243	C	T
ncRNA_intronic	TSBP1-AS1	6	32318644	32318644	rs12662503	0.228904	C	T
ncRNA_intronic	TSBP1-AS1	6	32321554	32321554	rs2395148	0.0816044	T	G
ncRNA_intronic	TSBP1-AS1	6	32324544	32324544	rs2206618	0.124469	A	G
ncRNA_intronic	TSBP1-AS1	6	32329883	32329883	rs147425711	0.22863	T	C
ncRNA_intronic	TSBP1-AS1	6	32330306	32330306	rs9268330	0.124432	A	G
ncRNA_intronic	TSBP1-AS1	6	32332521	32332521	rs146634283	0.582587	G	A
ncRNA_intronic	TSBP1-AS1	6	32332693	32332693	rs9268351	0.270331	A	G
ncRNA_intronic	TSBP1-AS1	6	32337630	32337630	rs2273017	0.147557	G	A
ncRNA_intronic	TSBP1-AS1	6	32339076	32339076	rs2050190	0.116346	G	A
ncRNA_intronic	TSBP1-AS1	6	32339647	32339647	rs2050189	0.124723	C	T
ncRNA_intronic	TSBP1-AS1	6	32339840	32339840	rs6913309	0.376919	A	T
ncRNA_intronic	TSBP1-AS1	6	32340106	32340106	rs2281276	0.120299	G	A
ncRNA_intronic	TSBP1-AS1	6	32340872	32340872	rs3129944	0.120996	C	G
ncRNA_intronic	TSBP1-AS1	6	32342691	32342691	rs7746327	0.123777	A	C
ncRNA_intronic	TSBP1-AS1	6	32343369	32343369	rs3117106	0.17286	C	T
ncRNA_intronic	TSBP1-AS1	6	32353590	32353590	rs9268469	0.173262	A	G
ncRNA_intronic	TSBP1-AS1	6	32353735	32353735	rs182229954	0.0528285	T	C
ncRNA_intronic	TSBP1-AS1	6	32354428	32354428	rs4424066	0.134162	G	A
ncRNA_intronic	TSBP1-AS1	6	32356755	32356755	rs62402738	0.193515	G	A
ncRNA_intronic	TSBP1-AS1	6	32358270	32358270	rs3117099	0.103095	A	G
ncRNA_intronic	HCG23,TSBP1-AS1	6	32358549	32358549	rs9348883	0.267987	A	T
ncRNA_intronic	HCG23,TSBP1-AS1	6	32358942	32358942	rs9268476	0.13417	A	T
ncRNA_intronic	HCG23,TSBP1-AS1	6	32360970	32360970	rs3817980	0.0797878	G	C
ncRNA_intronic	HCG23,TSBP1-AS1	6	32361111	32361111	rs3817973	0.13417	T	C
ncRNA_intronic	TSBP1-AS1	6	32363639	32363639	rs2076532	0.0799235	G	T
exonic	BTNL2	6	32363816	32363816	rs2076530	0.123164	C	T
ncRNA_intronic	TSBP1-AS1	6	32365707	32365707	rs62402759	0.129004	C	T
ncRNA_intronic	TSBP1-AS1	6	32367451	32367451	rs2294883	0.128972	A	T
ncRNA_intronic	TSBP1-AS1	6	32367795	32367795	rs2294878	0.109566	T	G
ncRNA_intronic	TSBP1-AS1	6	32367847	32367847	rs3817966	0.113745	C	T
ncRNA_intronic	TSBP1-AS1	6	32368558	32368558	rs9268485	0.114735	T	C
ncRNA_intronic	TSBP1-AS1	6	32368561	32368561	rs9268487	0.388009	C	A
ncRNA_intronic	TSBP1-AS1	6	32369605	32369605	rs113258800	0.388009	G	A
ncRNA_intronic	TSBP1-AS1	6	32369886	32369886	rs4935352	0.138374	G	A
exonic	BTNL2	6	32370835	32370835	rs2076523	0.0985612	T	C
ncRNA_intronic	TSBP1-AS1	6	32371852	32371852	rs112711428	0.387923	T	A
ncRNA_intronic	TSBP1-AS1	6	32372023	32372023	rs149080374	0.58149	G	A
ncRNA_intronic	TSBP1-AS1	6	32373698	32373698	rs3806156	0.0985612	G	T
ncRNA_exonic	TSBP1-AS1	6	32375352	32375352	rs9268494	0.106996	C	A
intergenic	TSBP1-AS1(dist=3195),HLA-DRA(dist=28963)	6	32378701	32378701	rs116023803	0.177127	G	A
intergenic	TSBP1-AS1(dist=5386),HLA-DRA(dist=26772)	6	32380892	32380892	rs9469108	0.163638	T	C
intergenic	TSBP1-AS1(dist=6433),HLA-DRA(dist=25725)	6	32381939	32381939	rs743862	0.215047	C	T
intergenic	TSBP1-AS1(dist=8093),HLA-DRA(dist=24065)	6	32383599	32383599	rs117508328	0.583201	A	G
intergenic	TSBP1-AS1(dist=11048),HLA-DRA(dist=21110)	6	32386554	32386554	rs4355646	0.130976	C	T
intergenic	TSBP1-AS1(dist=12877),HLA-DRA(dist=19281)	6	32388383	32388383	rs11757673	0.387098	G	T
intergenic	TSBP1-AS1(dist=13799),HLA-DRA(dist=18359)	6	32389305	32389305	rs9268557	0.144933	T	C
intergenic	TSBP1-AS1(dist=14142),HLA-DRA(dist=18016)	6	32389648	32389648	rs3135363	0.0609252	G	A
intergenic	TSBP1-AS1(dist=15102),HLA-DRA(dist=17056)	6	32390608	32390608	rs187751879	0.583201	C	T
intergenic	TSBP1-AS1(dist=16485),HLA-DRA(dist=15673)	6	32391991	32391991	rs35875335	0.44805	C	T
intergenic	TSBP1-AS1(dist=17037),HLA-DRA(dist=15121)	6	32392543	32392543	rs2157334	0.0535896	C	T
intergenic	TSBP1-AS1(dist=18678),HLA-DRA(dist=13480)	6	32394184	32394184	rs9501400	0.120228	G	A
intergenic	TSBP1-AS1(dist=19876),HLA-DRA(dist=12282)	6	32395382	32395382	rs117248572	0.583773	T	C
intergenic	TSBP1-AS1(dist=22288),HLA-DRA(dist=9870)	6	32397794	32397794	rs9268588	0.105448	G	C
intergenic	TSBP1-AS1(dist=23627),HLA-DRA(dist=8531)	6	32399133	32399133	rs61341125	0.583773	T	C
intergenic	TSBP1-AS1(dist=25014),HLA-DRA(dist=7144)	6	32400520	32400520	rs3129858	0.258669	A	G
intergenic	TSBP1-AS1(dist=26719),HLA-DRA(dist=5439)	6	32402225	32402225	rs960736	0.105448	C	T
intronic	HLA-DRA	6	32408735	32408735	rs3129878	0.135791	A	C
intronic	HLA-DRA	6	32409530	32409530	rs3129882	0.109509	A	G
downstream	HLA-DRA(dist=737)	6	32413560	32413560	rs16822660	0.414147	C	T
intergenic	HLA-DRA(dist=1464),HLA-DRB5(dist=70843)	6	32414287	32414287	rs9268670	0.142699	T	C
intergenic	HLA-DRA(dist=3609),HLA-DRB5(dist=68698)	6	32416432	32416432	rs9501630	0.383437	T	G
intergenic	HLA-DRA(dist=4003),HLA-DRB5(dist=68304)	6	32416826	32416826	rs9268693	0.131521	T	C
intergenic	HLA-DRA(dist=4570),HLA-DRB5(dist=67737)	6	32417393	32417393	rs28895061	0.438898	T	C
intergenic	HLA-DRA(dist=5423),HLA-DRB5(dist=66884)	6	32418246	32418246	rs117899196	0.38671	T	G
intergenic	HLA-DRA(dist=5756),HLA-DRB5(dist=66551)	6	32418579	32418579	rs9268765	0.142659	A	C
intergenic	HLA-DRA(dist=6036),HLA-DRB5(dist=66271)	6	32418859	32418859	rs28895096	0.44943	C	G
intergenic	HLA-DRA(dist=6071),HLA-DRB5(dist=66236)	6	32418894	32418894	rs117199710	0.583201	A	G
intergenic	HLA-DRA(dist=6125),HLA-DRB5(dist=66182)	6	32418948	32418948	rs9461748	0.0900955	C	T
intergenic	HLA-DRA(dist=7356),HLA-DRB5(dist=64951)	6	32420179	32420179	rs7754768	0.142659	C	T
intergenic	HLA-DRA(dist=8002),HLA-DRB5(dist=64305)	6	32420825	32420825	rs28895122	0.439643	T	C
intergenic	HLA-DRA(dist=8449),HLA-DRB5(dist=63858)	6	32421272	32421272	rs3129896	0.193796	A	G
intergenic	HLA-DRA(dist=9525),HLA-DRB5(dist=62782)	6	32422348	32422348	rs13212435	0.342523	T	C
intergenic	HLA-DRA(dist=9899),HLA-DRB5(dist=62408)	6	32422722	32422722	rs4577793	0.128363	C	T
intergenic	HLA-DRA(dist=10884),HLA-DRB5(dist=61423)	6	32423707	32423707	rs13220234	0.44943	T	C
intergenic	HLA-DRA(dist=11889),HLA-DRB5(dist=60418)	6	32424712	32424712	rs9501639	0.414147	G	A
intergenic	HLA-DRA(dist=12574),HLA-DRB5(dist=59733)	6	32425397	32425397	rs9268820	0.141164	C	A
intergenic	HLA-DRA(dist=12649),HLA-DRB5(dist=59658)	6	32425472	32425472	rs13195258	0.44943	T	C
intergenic	HLA-DRA(dist=13448),HLA-DRB5(dist=58859)	6	32426271	32426271	rs4601112	0.196196	C	T
intergenic	HLA-DRA(dist=14347),HLA-DRB5(dist=57960)	6	32427170	32427170	rs28732224	0.449644	T	C
intergenic	HLA-DRA(dist=14925),HLA-DRB5(dist=57382)	6	32427748	32427748	rs9268831	0.159804	C	T
intergenic	HLA-DRA(dist=17503),HLA-DRB5(dist=54804)	6	32430326	32430326	rs9268864	0.0972273	A	T
intergenic	HLA-DRA(dist=17514),HLA-DRB5(dist=54793)	6	32430337	32430337	rs13193827	0.450402	A	C
intergenic	HLA-DRA(dist=18909),HLA-DRB5(dist=53398)	6	32431732	32431732	rs59406271	0.583732	C	T
intergenic	HLA-DRA(dist=20936),HLA-DRB5(dist=51371)	6	32433759	32433759	rs35880697	0.383004	T	C
intergenic	HLA-DRA(dist=20975),HLA-DRB5(dist=51332)	6	32433798	32433798	rs9268949	0.107529	T	C
intergenic	HLA-DRA(dist=22726),HLA-DRB5(dist=49581)	6	32435549	32435549	rs9268989	0.126712	A	G
intergenic	HLA-DRA(dist=23417),HLA-DRB5(dist=48890)	6	32436240	32436240	rs9391782	0.0960085	C	A
intergenic	HLA-DRA(dist=25690),HLA-DRB5(dist=46617)	6	32438513	32438513	rs12524496	0.450402	C	G
intergenic	HLA-DRA(dist=25781),HLA-DRB5(dist=46526)	6	32438604	32438604	rs6924760	0.392669	T	A
intergenic	HLA-DRA(dist=26206),HLA-DRB5(dist=46101)	6	32439029	32439029	rs9405109	0.0972273	C	T
intergenic	HLA-DRA(dist=28057),HLA-DRB5(dist=44250)	6	32440880	32440880	rs67970757	0.450402	A	G
intergenic	HLA-DRA(dist=28223),HLA-DRB5(dist=44084)	6	32441046	32441046	rs9461755	0.392669	A	G
intergenic	HLA-DRA(dist=31199),HLA-DRB5(dist=41108)	6	32444022	32444022	rs28895250	0.123319	C	T
intronic	HLA-DRB1	6	32548122	32548122	rs4448132	0.48906	G	C
intergenic	HLA-DRB1(dist=8536),HLA-DQA1(dist=39034)	6	32566149	32566149	rs9270664	0.136259	A	G
intergenic	HLA-DRB1(dist=11294),HLA-DQA1(dist=36276)	6	32568907	32568907	rs9270769	0.115634	T	A
intergenic	HLA-DRB1(dist=11684),HLA-DQA1(dist=35886)	6	32569297	32569297	rs9270797	0.136773	G	A
intergenic	HLA-DRB1(dist=11893),HLA-DQA1(dist=35677)	6	32569506	32569506	rs28510673	0.48927	T	G
intergenic	HLA-DRB1(dist=12739),HLA-DQA1(dist=34831)	6	32570352	32570352	rs2516050	0.115634	G	A
intergenic	HLA-DRB1(dist=12881),HLA-DQA1(dist=34689)	6	32570494	32570494	rs72847591	0.48927	T	C
intergenic	HLA-DRB1(dist=13701),HLA-DQA1(dist=33869)	6	32571314	32571314	rs9270876	0.115634	T	A
intergenic	HLA-DRB1(dist=14542),HLA-DQA1(dist=33028)	6	32572155	32572155	rs4382332	0.48927	C	T
intergenic	HLA-DRB1(dist=14567),HLA-DQA1(dist=33003)	6	32572180	32572180	rs9270910	0.136793	C	G
intergenic	HLA-DRB1(dist=14886),HLA-DQA1(dist=32684)	6	32572499	32572499	rs587495	0.127247	T	C
intergenic	HLA-DRB1(dist=16016),HLA-DQA1(dist=31554)	6	32573629	32573629	rs602875	0.0905964	G	A
intergenic	HLA-DRB1(dist=16840),HLA-DQA1(dist=30730)	6	32574453	32574453	rs61670843	0.48927	T	C
intergenic	HLA-DRB1(dist=17123),HLA-DQA1(dist=30447)	6	32574736	32574736	rs618095	0.115185	G	A
intergenic	HLA-DRB1(dist=17609),HLA-DQA1(dist=29961)	6	32575222	32575222	rs72850029	0.48927	T	G
intergenic	HLA-DRB1(dist=18133),HLA-DQA1(dist=29437)	6	32575746	32575746	rs3021303	0.115185	G	T
intergenic	HLA-DRB1(dist=18370),HLA-DQA1(dist=29200)	6	32575983	32575983	rs12660719	0.361549	G	A
intergenic	HLA-DRB1(dist=18451),HLA-DQA1(dist=29119)	6	32576064	32576064	rs482044	0.0686717	C	G
intergenic	HLA-DRB1(dist=18652),HLA-DQA1(dist=28918)	6	32576265	32576265	rs34811813	0.48927	T	G
intergenic	HLA-DRB1(dist=19108),HLA-DQA1(dist=28462)	6	32576721	32576721	rs647455	0.108097	A	G
intergenic	HLA-DRB1(dist=19412),HLA-DQA1(dist=28158)	6	32577025	32577025	rs9271138	0.48927	G	T
intergenic	HLA-DRB1(dist=19433),HLA-DQA1(dist=28137)	6	32577046	32577046	rs562289	0.11117	T	C
intergenic	HLA-DRB1(dist=20245),HLA-DQA1(dist=27325)	6	32577858	32577858	rs673336	0.108136	A	G
intergenic	HLA-DRB1(dist=20585),HLA-DQA1(dist=26985)	6	32578198	32578198	rs55703642	0.48927	C	T
intergenic	HLA-DRB1(dist=21664),HLA-DQA1(dist=25906)	6	32579277	32579277	rs9271215	0.118184	T	C
intergenic	HLA-DRB1(dist=22291),HLA-DQA1(dist=25279)	6	32579904	32579904	rs113529606	0.48927	T	C
intergenic	HLA-DRB1(dist=23395),HLA-DQA1(dist=24175)	6	32581008	32581008	rs3129747	0.117776	C	T
intergenic	HLA-DRB1(dist=23477),HLA-DQA1(dist=24093)	6	32581090	32581090	rs117125720	0.159944	A	T
intergenic	HLA-DRB1(dist=23562),HLA-DQA1(dist=24008)	6	32581175	32581175	rs34471348	0.48927	C	T
intergenic	HLA-DRB1(dist=24788),HLA-DQA1(dist=22782)	6	32582401	32582401	rs5004278	0.108342	C	G
intergenic	HLA-DRB1(dist=25356),HLA-DQA1(dist=22214)	6	32582969	32582969	rs112627226	0.48927	C	T
intergenic	HLA-DRB1(dist=25433),HLA-DQA1(dist=22137)	6	32583046	32583046	rs3129754	0.111972	A	G
intergenic	HLA-DRB1(dist=25891),HLA-DQA1(dist=21679)	6	32583504	32583504	rs114991247	0.159572	C	T
intergenic	HLA-DRB1(dist=26144),HLA-DQA1(dist=21426)	6	32583757	32583757	rs113711404	0.48927	A	G
intergenic	HLA-DRB1(dist=26317),HLA-DQA1(dist=21253)	6	32583930	32583930	rs35542934	0.111364	T	C
intergenic	HLA-DRB1(dist=27442),HLA-DQA1(dist=20128)	6	32585055	32585055	rs686250	0.113473	A	G
intergenic	HLA-DRB1(dist=29552),HLA-DQA1(dist=18018)	6	32587165	32587165	rs9271377	0.180579	G	T
intergenic	HLA-DRB1(dist=29762),HLA-DQA1(dist=17808)	6	32587375	32587375	rs9271382	0.143921	A	G
intergenic	HLA-DRB1(dist=30418),HLA-DQA1(dist=17152)	6	32588031	32588031	rs9271431	0.132361	A	G
intergenic	HLA-DRB1(dist=31678),HLA-DQA1(dist=15892)	6	32589291	32589291	rs9271499	0.148466	C	T
intergenic	HLA-DRB1(dist=31714),HLA-DQA1(dist=15856)	6	32589327	32589327	rs114493852	0.159909	A	G
intergenic	HLA-DRB1(dist=33022),HLA-DQA1(dist=14548)	6	32590635	32590635	rs9271578	0.142088	A	T
intergenic	HLA-DRB1(dist=33027),HLA-DQA1(dist=14543)	6	32590640	32590640	rs2395226	0.159782	C	T
intergenic	HLA-DRB1(dist=34069),HLA-DQA1(dist=13501)	6	32591682	32591682	rs4959029	0.159685	C	T
intergenic	HLA-DRB1(dist=34164),HLA-DQA1(dist=13406)	6	32591777	32591777	rs9271620	0.142088	G	T
intergenic	HLA-DRB1(dist=35124),HLA-DQA1(dist=12446)	6	32592737	32592737	rs28421666	0.159643	G	A
intergenic	HLA-DRB1(dist=36448),HLA-DQA1(dist=11122)	6	32594061	32594061	rs9271763	0.142128	A	G
intergenic	HLA-DRB1(dist=36539),HLA-DQA1(dist=11031)	6	32594152	32594152	rs4645458	0.0591973	C	T
intergenic	HLA-DRB1(dist=41290),HLA-DQA1(dist=6280)	6	32598903	32598903	rs9272040	0.126308	G	A
intergenic	HLA-DRB1(dist=42287),HLA-DQA1(dist=5283)	6	32599900	32599900	rs116109088	0.159685	T	C
intergenic	HLA-DRB1(dist=42971),HLA-DQA1(dist=4599)	6	32600584	32600584	rs9272125	0.126308	G	T
intergenic	HLA-DRB1(dist=44255),HLA-DQA1(dist=3315)	6	32601868	32601868	rs9272200	0.0591298	C	T
intergenic	HLA-DRB1(dist=44317),HLA-DQA1(dist=3253)	6	32601930	32601930	rs3129773	0.14866	T	C
intergenic	HLA-DQA1(dist=14530),HLA-DQB1(dist=1256)	6	32625989	32625989	rs9273356	0.160864	A	G
intergenic	HLA-DQB1(dist=2662),HLA-DQA2(dist=72072)	6	32637096	32637096	rs9274699	0.113423	A	G
intergenic	HLA-DQB1(dist=14874),HLA-DQA2(dist=59860)	6	32649308	32649308	rs9275100	0.0943078	G	A
intergenic	HLA-DQB1(dist=16153),HLA-DQA2(dist=58581)	6	32650587	32650587	rs17205696	0.104977	T	C
intergenic	HLA-DQB1(dist=18584),HLA-DQA2(dist=56150)	6	32653018	32653018	rs28371251	0.106834	C	T
intergenic	HLA-DQB1(dist=19234),HLA-DQA2(dist=55500)	6	32653668	32653668	rs113251386	0.469433	G	A
intergenic	HLA-DQB1(dist=19713),HLA-DQA2(dist=55021)	6	32654147	32654147	rs9275175	0.0971022	G	A
intergenic	HLA-DQB1(dist=21819),HLA-DQA2(dist=52915)	6	32656253	32656253	rs13195522	0.442636	A	C
intergenic	HLA-DQB1(dist=21872),HLA-DQA2(dist=52862)	6	32656306	32656306	rs9275193	0.0970269	A	C
intergenic	HLA-DQB1(dist=22793),HLA-DQA2(dist=51941)	6	32657227	32657227	rs113201741	0.463798	C	T
intergenic	HLA-DQB1(dist=23144),HLA-DQA2(dist=51590)	6	32657578	32657578	rs7774434	0.095195	T	C
intergenic	HLA-DQB1(dist=23825),HLA-DQA2(dist=50909)	6	32658259	32658259	rs12528622	0.449848	A	G
intergenic	HLA-DQB1(dist=23995),HLA-DQA2(dist=50739)	6	32658429	32658429	rs9368737	0.105083	C	T
intergenic	HLA-DQB1(dist=24190),HLA-DQA2(dist=50544)	6	32658624	32658624	rs2157051	0.101546	G	A
intergenic	HLA-DQB1(dist=24564),HLA-DQA2(dist=50170)	6	32658998	32658998	rs17581061	0.463798	C	T
intergenic	HLA-DQB1(dist=24898),HLA-DQA2(dist=49836)	6	32659332	32659332	rs5002706	0.0671959	A	G
intergenic	HLA-DQB1(dist=25082),HLA-DQA2(dist=49652)	6	32659516	32659516	rs9275222	0.110069	T	A
intergenic	HLA-DQB1(dist=25102),HLA-DQA2(dist=49632)	6	32659536	32659536	rs72844311	0.449795	T	C
intergenic	HLA-DQB1(dist=25420),HLA-DQA2(dist=49314)	6	32659854	32659854	rs113362556	0.463798	A	T
intergenic	HLA-DQB1(dist=26559),HLA-DQA2(dist=48175)	6	32660993	32660993	rs72844343	0.449795	T	A
intergenic	HLA-DQB1(dist=26805),HLA-DQA2(dist=47929)	6	32661239	32661239	rs113180107	0.463798	C	T
intergenic	HLA-DQB1(dist=28392),HLA-DQA2(dist=46342)	6	32662826	32662826	rs112643393	0.463798	T	C
intergenic	HLA-DQB1(dist=28774),HLA-DQA2(dist=45960)	6	32663208	32663208	rs9275289	0.172529	A	C
intergenic	HLA-DQB1(dist=28825),HLA-DQA2(dist=45909)	6	32663259	32663259	rs112927854	0.449848	T	C
intergenic	HLA-DQB1(dist=29448),HLA-DQA2(dist=45286)	6	32663882	32663882	rs113154049	0.463798	A	G
intergenic	HLA-DQB1(dist=29729),HLA-DQA2(dist=45005)	6	32664163	32664163	rs6457622	0.172529	A	C
intergenic	HLA-DQB1(dist=30702),HLA-DQA2(dist=44032)	6	32665136	32665136	rs140055405	0.463798	G	T
intergenic	HLA-DQB1(dist=31182),HLA-DQA2(dist=43552)	6	32665616	32665616	rs2856664	0.102642	T	G
intergenic	HLA-DQB1(dist=31481),HLA-DQA2(dist=43253)	6	32665915	32665915	rs17206252	0.449848	C	T
intergenic	HLA-DQB1(dist=31940),HLA-DQA2(dist=42794)	6	32666374	32666374	rs113702169	0.463798	A	C
intergenic	HLA-DQB1(dist=32287),HLA-DQA2(dist=42447)	6	32666721	32666721	rs2856726	0.102642	T	A
intergenic	HLA-DQB1(dist=33592),HLA-DQA2(dist=41142)	6	32668026	32668026	rs72847174	0.449795	T	C
intergenic	HLA-DQB1(dist=33597),HLA-DQA2(dist=41137)	6	32668031	32668031	rs2856721	0.102487	C	A
intergenic	HLA-DQB1(dist=33634),HLA-DQA2(dist=41100)	6	32668068	32668068	rs115072775	0.463798	T	A
intergenic	HLA-DQB1(dist=33666),HLA-DQA2(dist=41068)	6	32668100	32668100	rs2647045	0.0961081	A	G
intergenic	HLA-DQB1(dist=34751),HLA-DQA2(dist=39983)	6	32669185	32669185	rs113919826	0.463798	T	C
intergenic	HLA-DQB1(dist=36420),HLA-DQA2(dist=38314)	6	32670854	32670854	rs112947282	0.463798	A	G
intergenic	HLA-DQB1(dist=36580),HLA-DQA2(dist=38154)	6	32671014	32671014	rs2856704	0.10216	A	C
intergenic	HLA-DQB1(dist=37605),HLA-DQA2(dist=37129)	6	32672039	32672039	rs3134997	0.163186	T	C
intergenic	HLA-DQB1(dist=38247),HLA-DQA2(dist=36487)	6	32672681	32672681	rs2647049	0.213107	A	C
intergenic	HLA-DQB1(dist=38458),HLA-DQA2(dist=36276)	6	32672892	32672892	rs117392376	0.463798	A	G
intergenic	HLA-DQB1(dist=39460),HLA-DQA2(dist=35274)	6	32673894	32673894	rs1794269	0.106755	T	C
intergenic	HLA-DQB1(dist=39843),HLA-DQA2(dist=34891)	6	32674277	32674277	rs28772283	0.11354	A	G
intergenic	HLA-DQB1(dist=39895),HLA-DQA2(dist=34839)	6	32674329	32674329	rs9275511	0.119055	G	A
intergenic	HLA-DQB1(dist=40407),HLA-DQA2(dist=34327)	6	32674841	32674841	rs17212637	0.117499	G	A
intergenic	HLA-DQB1(dist=40632),HLA-DQA2(dist=34102)	6	32675066	32675066	rs547480736	0.463798	T	C
intergenic	HLA-DQB1(dist=41466),HLA-DQA2(dist=33268)	6	32675900	32675900	rs28371283	0.111795	G	A
intergenic	HLA-DQB1(dist=41954),HLA-DQA2(dist=32780)	6	32676388	32676388	rs116953562	0.463798	G	A
intergenic	HLA-DQB1(dist=42554),HLA-DQA2(dist=32180)	6	32676988	32676988	rs9275553	0.120518	G	T
intergenic	HLA-DQB1(dist=43478),HLA-DQA2(dist=31256)	6	32677912	32677912	rs9275563	0.106758	T	C
intergenic	HLA-DQB1(dist=43526),HLA-DQA2(dist=31208)	6	32677960	32677960	rs112941700	0.463798	C	T
intergenic	HLA-DQB1(dist=43990),HLA-DQA2(dist=30744)	6	32678424	32678424	rs2894281	0.0725027	G	A
intergenic	HLA-DQB1(dist=45292),HLA-DQA2(dist=29442)	6	32679726	32679726	rs113413656	0.463798	A	G
intergenic	HLA-DQB1(dist=46645),HLA-DQA2(dist=28089)	6	32681079	32681079	rs111495201	0.463798	A	G
intergenic	HLA-DQB1(dist=48009),HLA-DQA2(dist=26725)	6	32682443	32682443	rs3104406	0.102215	A	G
intergenic	HLA-DQB1(dist=48230),HLA-DQA2(dist=26504)	6	32682664	32682664	rs9275601	0.105234	C	T
intergenic	HLA-DQB1(dist=48428),HLA-DQA2(dist=26306)	6	32682862	32682862	rs3892710	0.318798	T	C
intergenic	HLA-DQB1(dist=48821),HLA-DQA2(dist=25913)	6	32683255	32683255	rs528413248	0.141245	G	A
intergenic	HLA-DQB1(dist=49219),HLA-DQA2(dist=25515)	6	32683653	32683653	rs3104411	0.235698	G	A
intergenic	HLA-DQB1(dist=52254),HLA-DQA2(dist=22480)	6	32686688	32686688	rs28772314	0.144502	G	A
intergenic	HLA-DQB1(dist=53798),HLA-DQA2(dist=20936)	6	32688232	32688232	rs9469230	0.144374	G	A
intergenic	HLA-DQB1(dist=56809),HLA-DQA2(dist=17925)	6	32691243	32691243	rs2395239	0.140921	A	C
intergenic	HLA-DQB1(dist=57877),HLA-DQA2(dist=16857)	6	32692311	32692311	rs2859066	0.370412	C	A
intergenic	HLA-DQB1(dist=57915),HLA-DQA2(dist=16819)	6	32692349	32692349	rs2859065	0.141159	T	C
intergenic	HLA-DQB1(dist=58916),HLA-DQA2(dist=15818)	6	32693350	32693350	rs145080549	0.370412	T	C
intergenic	HLA-DQB1(dist=59072),HLA-DQA2(dist=15662)	6	32693506	32693506	rs12528892	0.477011	T	C
intergenic	HLA-DQB1(dist=59824),HLA-DQA2(dist=14910)	6	32694258	32694258	rs2858890	0.101687	C	G
intergenic	HLA-DQB1(dist=60090),HLA-DQA2(dist=14644)	6	32694524	32694524	rs11754075	0.0657665	G	A
intergenic	HLA-DQB1(dist=60120),HLA-DQA2(dist=14614)	6	32694554	32694554	rs117333568	0.370467	A	G
intergenic	HLA-DQB1(dist=61021),HLA-DQA2(dist=13713)	6	32695455	32695455	rs78705254	0.477011	T	C
intergenic	HLA-DQB1(dist=61248),HLA-DQA2(dist=13486)	6	32695682	32695682	rs2859054	0.144937	C	T
intergenic	HLA-DQB1(dist=61409),HLA-DQA2(dist=13325)	6	32695843	32695843	rs117585720	0.370494	T	C
intergenic	HLA-DQB1(dist=62401),HLA-DQA2(dist=12333)	6	32696835	32696835	rs2859124	0.144937	A	G
intergenic	HLA-DQB1(dist=62936),HLA-DQA2(dist=11798)	6	32697370	32697370	rs2859117	0.370494	C	T
intergenic	HLA-DQB1(dist=62971),HLA-DQA2(dist=11763)	6	32697405	32697405	rs111718686	0.455919	C	T
intergenic	HLA-DQB1(dist=63579),HLA-DQA2(dist=11155)	6	32698013	32698013	rs2859112	0.144937	C	T
intergenic	HLA-DQB1(dist=64369),HLA-DQA2(dist=10365)	6	32698803	32698803	rs116081639	0.103703	G	C
intergenic	HLA-DQB1(dist=64706),HLA-DQA2(dist=10028)	6	32699140	32699140	rs9276183	0.150879	C	T
intergenic	HLA-DQB1(dist=65799),HLA-DQA2(dist=8935)	6	32700233	32700233	rs2859094	0.0562408	G	T
intergenic	HLA-DQB1(dist=66087),HLA-DQA2(dist=8647)	6	32700521	32700521	rs9276225	0.0888352	G	A
intergenic	HLA-DQB1(dist=66096),HLA-DQA2(dist=8638)	6	32700530	32700530	rs28724875	0.185035	G	C
intergenic	HLA-DQB1(dist=67522),HLA-DQA2(dist=7212)	6	32701956	32701956	rs146192563	0.103682	G	A
intergenic	HLA-DQB1(dist=68280),HLA-DQA2(dist=6454)	6	32702714	32702714	rs9276285	0.204327	G	A
intergenic	HLA-DQB1(dist=68879),HLA-DQA2(dist=5855)	6	32703313	32703313	rs2859072	0.101052	A	G
intergenic	HLA-DQB1(dist=71296),HLA-DQA2(dist=3438)	6	32705730	32705730	rs28701994	0.13419	T	G
intronic	HLA-DQA2	6	32710704	32710704	rs9276416	0.151231	A	G
intronic	HLA-DQA2	6	32710889	32710889	rs148257063	0.0774769	A	G
intronic	HLA-DQA2	6	32711178	32711178	rs17500468	0.474087	G	A
upstream	MIR3135B(dist=589)	6	32718345	32718345	rs113400890	0.474193	C	T
intergenic	MIR3135B(dist=2876),HLA-DQB2(dist=3243)	6	32720632	32720632	rs10947341	0.154233	T	C
UTR3	HLA-DQB2(NM_001198858:c.*187T>C,NM_001300790:c.*187T>C)	6	32724043	32724043	rs3656	0.474262	A	G
exonic	HLA-DQB2	6	32725620	32725620	rs9276571	0.100044	A	G
intronic	HLA-DQB2	6	32730940	32730940	rs2071550	0.0990838	A	C
intergenic	HLA-DQB2(dist=3227),HLA-DOB(dist=46004)	6	32734536	32734536	rs17219918	0.472544	A	G
intergenic	HLA-DQB2(dist=6198),HLA-DOB(dist=43033)	6	32737507	32737507	rs9368741	0.0986578	A	G
intergenic	HLA-DQB2(dist=8579),HLA-DOB(dist=40652)	6	32739888	32739888	rs1383265	0.100772	C	T
intergenic	HLA-DQB2(dist=11260),HLA-DOB(dist=37971)	6	32742569	32742569	rs7383224	0.115892	C	G
intergenic	HLA-DQB2(dist=13543),HLA-DOB(dist=35688)	6	32744852	32744852	rs13203429	0.095137	G	C
intergenic	HLA-DQB2(dist=14869),HLA-DOB(dist=34362)	6	32746178	32746178	rs7742085	0.0516649	G	T
intergenic	HLA-DQB2(dist=18951),HLA-DOB(dist=30280)	6	32750260	32750260	rs113936637	0.466556	A	T
intergenic	HLA-DQB2(dist=19927),HLA-DOB(dist=29304)	6	32751236	32751236	rs2857181	0.091709	C	T
intergenic	HLA-DQB2(dist=25988),HLA-DOB(dist=23243)	6	32757297	32757297	rs9276711	0.115621	T	C
intergenic	HLA-DQB2(dist=33454),HLA-DOB(dist=15777)	6	32764763	32764763	rs73739311	0.354991	T	C
intergenic	HLA-DQB2(dist=34694),HLA-DOB(dist=14537)	6	32766003	32766003	rs6937723	0.109271	T	A
intergenic	HLA-DQB2(dist=34849),HLA-DOB(dist=14382)	6	32766158	32766158	rs113532053	0.464862	C	G
intergenic	HLA-DQB2(dist=42607),HLA-DOB(dist=6624)	6	32773916	32773916	rs117505369	0.362668	A	C
intergenic	HLA-DQB2(dist=43645),HLA-DOB(dist=5586)	6	32774954	32774954	rs6917611	0.0967964	C	G
intronic	HLA-DOB	6	32782605	32782605	rs2071473	0.0999762	C	T
upstream	HLA-DOB(dist=4)	6	32784783	32784783	rs2071469	0.095723	T	C
intergenic	HLA-DOB(dist=2103),TAP2(dist=2728)	6	32786882	32786882	rs3763355	0.141271	C	T
intergenic	HLA-DOB(dist=3732),TAP2(dist=1099)	6	32788511	32788511	rs9784758	0.232791	C	T
downstream	TAP2(dist=903)	6	32788707	32788707	rs2621323	0.0981683	A	G
intronic	TAP2	6	32797684	32797684	rs241437	0.102845	G	A
intronic	TAP2	6	32802807	32802807	rs4148872	0.265994	T	C
intronic	TAP2	6	32804284	32804284	rs3819716	0.0915951	A	G
ncRNA_intronic	PSMB8-AS1	6	32812916	32812916	rs2071540	0.106662	T	C
intergenic	PSMB9(dist=1676),LOC100294145(dist=32649)	6	32829304	32829304	rs9276821	0.102682	G	A
intergenic	PSMB9(dist=2940),LOC100294145(dist=31385)	6	32830568	32830568	rs9276826	0.44939	G	A
intergenic	PSMB9(dist=4696),LOC100294145(dist=29629)	6	32832324	32832324	rs74855830	0.0575749	A	G
intergenic	PSMB9(dist=6356),LOC100294145(dist=27969)	6	32833984	32833984	rs117535069	0.35308	T	C
intergenic	PSMB9(dist=13352),LOC100294145(dist=20973)	6	32840980	32840980	rs6923186	0.0974631	A	G
intergenic	PSMB9(dist=25591),LOC100294145(dist=8734)	6	32853219	32853219	rs35571244	0.336575	C	T
intergenic	PSMB9(dist=32050),LOC100294145(dist=2275)	6	32859678	32859678	rs142531580	0.344398	G	A
intergenic	LOC100294145(dist=27761),HLA-DMB(dist=3118)	6	32899296	32899296	rs154978	0.0878297	T	C
intergenic	LOC100294145(dist=28483),HLA-DMB(dist=2396)	6	32900018	32900018	rs154977	0.0803417	C	G
intronic	HLA-DMB	6	32904601	32904601	rs2071556	0.0940699	T	G
intergenic	HLA-DMB(dist=3476),HLA-DMA(dist=4114)	6	32912281	32912281	rs117217050	0.310547	G	A
intergenic	HLA-DMA(dist=4423),BRD2(dist=11074)	6	32925297	32925297	rs189992	0.395858	A	G
intergenic	HLA-DMA(dist=11276),BRD2(dist=4221)	6	32932150	32932150	rs206783	0.0985196	A	C
intronic	BRD2	6	32943084	32943084	rs488216	0.293061	A	T
intergenic	BRD2(dist=13138),HLA-DOA(dist=9540)	6	32962420	32962420	rs206767	0.0890709	C	A
intergenic	BRD2(dist=16607),HLA-DOA(dist=6071)	6	32965889	32965889	rs4713602	0.115852	A	C
intergenic	BRD2(dist=17578),HLA-DOA(dist=5100)	6	32966860	32966860	rs372546769	0.0659967	G	A
intronic	HLA-DOA	6	32976909	32976909	rs743771	0.0714663	C	A
upstream	HLA-DOA(dist=167)	6	32977535	32977535	rs396090	0.0616109	A	G
intergenic	HLA-DOA(dist=2309),HLA-DPA1(dist=52669)	6	32979677	32979677	rs11965463	0.248659	A	G
intergenic	HLA-DOA(dist=9205),HLA-DPA1(dist=45773)	6	32986573	32986573	rs6457701	0.0642966	G	A
intergenic	HLA-DOA(dist=16779),HLA-DPA1(dist=38199)	6	32994147	32994147	rs9277017	0.0677954	T	A
intergenic	HLA-DOA(dist=17386),HLA-DPA1(dist=37592)	6	32994754	32994754	rs55937150	0.244247	G	A
intergenic	HLA-DOA(dist=28630),HLA-DPA1(dist=26348)	6	33005998	33005998	rs36121920	0.243629	T	C
intergenic	HLA-DOA(dist=33765),HLA-DPA1(dist=21213)	6	33011133	33011133	rs401348	0.333658	C	T
intergenic	HLA-DOA(dist=34719),HLA-DPA1(dist=20259)	6	33012087	33012087	rs665326	0.0792783	T	C
intergenic	HLA-DOA(dist=42318),HLA-DPA1(dist=12660)	6	33019686	33019686	rs446287	0.0777831	C	T
intergenic	HLA-DOA(dist=43328),HLA-DPA1(dist=11650)	6	33020696	33020696	rs3097661	0.0837439	C	A
intergenic	HLA-DOA(dist=46424),HLA-DPA1(dist=8554)	6	33023792	33023792	rs3097669	0.0612404	C	A
intergenic	HLA-DOA(dist=46628),HLA-DPA1(dist=8350)	6	33023996	33023996	rs3130183	0.0786816	T	A
intergenic	HLA-DOA(dist=47446),HLA-DPA1(dist=7532)	6	33024814	33024814	rs72873911	0.186514	C	T
intergenic	HLA-DOA(dist=48072),HLA-DPA1(dist=6906)	6	33025440	33025440	rs2116260	0.0583836	C	T
intergenic	HLA-DOA(dist=51667),HLA-DPA1(dist=3311)	6	33029035	33029035	rs67214734	0.186509	G	A
intergenic	HLA-DOA(dist=52708),HLA-DPA1(dist=2270)	6	33030076	33030076	rs79541122	0.0584294	C	G
downstream	HLA-DPA1(dist=932)	6	33031414	33031414	rs111648287	0.186556	A	G
downstream	HLA-DPA1(dist=559)	6	33031787	33031787	rs79786719	0.0584294	C	A
UTR3	HLA-DPA1(NM_001242525:c.*162G>A,NM_001242524:c.*162G>A,NM_033554:c.*162G>A)	6	33032975	33032975	rs7905	0.179543	C	T
intronic	HLA-DPA1	6	33033199	33033199	rs77403406	0.0584294	C	T
intronic	HLA-DPA1	6	33034321	33034321	rs114721295	0.0541665	C	T
intronic	HLA-DPA1	6	33034815	33034815	rs1367728	0.176038	A	G
intronic	HLA-DPA1	6	33035424	33035424	rs72870108	0.186016	T	A
intronic	HLA-DPA1	6	33035771	33035771	rs1054025	0.0583723	C	T
exonic	HLA-DPA1	6	33037560	33037560	rs1042176	0.179089	A	G
intronic	HLA-DPA1	6	33038982	33038982	rs72879625	0.200201	A	G
intronic	HLA-DPA1	6	33041073	33041073	rs9357156	0.0656132	C	A
intronic	HLA-DPA1,HLA-DPB1	6	33044956	33044956	rs6934289	0.176243	C	T
intronic	HLA-DPA1,HLA-DPB1	6	33046726	33046726	rs2021408	0.150619	C	T
exonic	HLA-DPB1	6	33048599	33048599	rs707958	0.144551	C	A
exonic	HLA-DPB1	6	33048602	33048602	rs1042131	0.0655815	C	A
intronic	HLA-DPB1	6	33050036	33050036	rs9277360	0.16376	C	T
intronic	HLA-DPB1	6	33050521	33050521	rs9277387	0.0556843	G	T
intronic	HLA-DPB1	6	33052072	33052072	rs9277432	0.0558883	A	T
exonic	HLA-DPB1	6	33052981	33052981	rs14362	0.171222	A	C
intronic	HLA-DPB1	6	33054145	33054145	rs3097676	0.164124	G	A
UTR3	HLA-DPB1(NM_002121:c.*70T>C)	6	33054381	33054381	rs1042488	0.0527762	T	C
UTR3	HLA-DPB1(NM_002121:c.*1190T>C)	6	33055501	33055501	rs9277552	0.147384	T	C
UTR3	HLA-DPB1(NM_002121:c.*2455A>G)	6	33056766	33056766	rs3117227	0.209002	A	G
UTR3	HLA-DPB1(NM_002121:c.*2933T>G)	6	33057244	33057244	rs3091284	0.053192	T	G
intergenic	HLA-DPB1(dist=2196),HLA-DPB2(dist=20624)	6	33059669	33059669	rs2281390	0.16651	T	G
intergenic	HLA-DPB1(dist=2323),HLA-DPB2(dist=20497)	6	33059796	33059796	rs2281389	0.162802	G	A
intergenic	HLA-DPB1(dist=6822),HLA-DPB2(dist=15998)	6	33064295	33064295	rs9277572	0.0532068	G	A
intergenic	HLA-DPB1(dist=11375),HLA-DPB2(dist=11445)	6	33068848	33068848	rs3130209	0.209002	T	C
intergenic	HLA-DPB1(dist=12340),HLA-DPB2(dist=10480)	6	33069813	33069813	rs3117244	0.166416	A	G
intergenic	HLA-DPB1(dist=13951),HLA-DPB2(dist=8869)	6	33071424	33071424	rs3128924	0.165036	A	G
intergenic	HLA-DPB1(dist=19798),HLA-DPB2(dist=3022)	6	33077271	33077271	rs3130216	0.209141	G	A
ncRNA_intronic	HLA-DPB2	6	33081707	33081707	rs34823653	0.162064	T	C
ncRNA_intronic	HLA-DPB2	6	33083096	33083096	rs6457714	0.066877	T	A
ncRNA_intronic	HLA-DPB2	6	33089603	33089603	rs12528890	0.138758	T	C
ncRNA_intronic	HLA-DPB2	6	33090758	33090758	rs3129281	0.148984	C	T
ncRNA_intronic	HLA-DPB2	6	33090892	33090892	rs56041236	0.259727	T	C
ncRNA_intronic	HLA-DPB2	6	33092049	33092049	rs3117021	0.0660622	C	T
ncRNA_intronic	HLA-DPB2	6	33092455	33092455	rs17214936	0.169031	T	C
ncRNA_intronic	HLA-DPB2	6	33094663	33094663	rs3130231	0.138877	C	T
ncRNA_intronic	HLA-DPB2	6	33095176	33095176	rs3130233	0.0668917	C	T
intergenic	HLA-DPB2(dist=2511),HCG24(dist=11700)	6	33099401	33099401	rs9378180	0.0667954	A	T
intergenic	HLA-DPB2(dist=2911),HCG24(dist=11300)	6	33099801	33099801	rs140129579	0.139954	T	C
intergenic	HLA-DPB2(dist=5316),HCG24(dist=8895)	6	33102206	33102206	rs9380349	0.0667296	T	C
intergenic	HLA-DPB2(dist=6725),HCG24(dist=7486)	6	33103615	33103615	rs7750320	0.149143	G	A
intergenic	HLA-DPB2(dist=6770),HCG24(dist=7441)	6	33103660	33103660	rs7770843	0.248066	T	G
intergenic	HLA-DPB2(dist=9252),HCG24(dist=4959)	6	33106142	33106142	rs9277867	0.149143	T	C
intergenic	HLA-DPB2(dist=9798),HCG24(dist=4413)	6	33106688	33106688	rs114936791	0.26466	A	G
ncRNA_intronic	HCG24	6	33112063	33112063	rs9469374	0.142532	G	T
ncRNA_intronic	HCG24	6	33112159	33112159	rs9469375	0.0662642	C	A
ncRNA_exonic	HCG24	6	33116286	33116286	rs4363078	0.0662592	T	C
downstream	HCG24(dist=563)	6	33117155	33117155	rs62407809	0.142583	G	A
intergenic	HCG24(dist=4285),COL11A2(dist=9592)	6	33120877	33120877	rs3116962	0.149236	T	A
intergenic	HCG24(dist=8870),COL11A2(dist=5007)	6	33125462	33125462	rs3129206	0.15034	C	T
intergenic	HCG24(dist=11785),COL11A2(dist=2092)	6	33128377	33128377	rs9368757	0.0659335	A	G
intronic	COL11A2	6	33137689	33137689	rs9277929	0.197946	T	C
intronic	COL11A2	6	33142792	33142792	rs2071026	0.185182	T	C
intronic	COL11A2	6	33149379	33149379	rs17221541	0.192653	A	G
intergenic	RING1(dist=8003),HCG25(dist=28818)	6	33188495	33188495	rs6914404	0.0743547	G	A
intergenic	RING1(dist=17079),HCG25(dist=19742)	6	33197571	33197571	rs9277947	0.178355	T	C
intronic	VPS52	6	33232521	33232521	rs213201	0.10448	C	T
UTR5	ZBTB22(NM_005453:c.-805A>G)	6	33285498	33285498	rs184714444	0.214788	T	C
intergenic	SMIM40(dist=11443),KIFC1(dist=51101)	6	33308499	33308499	rs187984126	0.311793	G	A
intergenic	SMIM40(dist=26209),KIFC1(dist=36335)	6	33323265	33323265	rs211468	0.0785919	C	T
intergenic	SMIM40(dist=40032),KIFC1(dist=22512)	6	33337088	33337088	rs67136908	0.211669	T	C
intergenic	SMIM40(dist=54395),KIFC1(dist=8149)	6	33351451	33351451	rs114972028	0.251917	T	A
intronic	SYNGAP1	6	33388894	33388894	rs114993678	0.248347	G	C
intronic	SYNGAP1	6	33389381	33389381	rs211456	0.0937565	G	T
intronic	SYNGAP1	6	33408918	33408918	rs538693715	0.197501	G	A
intergenic	ZBTB9(dist=17685),BAK1(dist=97324)	6	33443005	33443005	rs143582413	0.201293	T	G
intergenic	ZBTB9(dist=27566),BAK1(dist=87443)	6	33452886	33452886	rs9380361	0.0791691	G	A
intergenic	ZBTB9(dist=36464),BAK1(dist=78545)	6	33461784	33461784	rs34838160	0.0923917	G	A
intergenic	ZBTB9(dist=55115),BAK1(dist=59894)	6	33480435	33480435	rs86715	0.207034	G	A
intergenic	ZBTB9(dist=67519),BAK1(dist=47490)	6	33492839	33492839	rs72880049	0.0496886	A	G
intergenic	ZBTB9(dist=83703),BAK1(dist=31306)	6	33509023	33509023	rs210199	0.0535383	C	A
intergenic	ZBTB9(dist=94283),BAK1(dist=20726)	6	33519603	33519603	rs210159	0.203609	G	C
intergenic	ZBTB9(dist=97590),BAK1(dist=17419)	6	33522910	33522910	rs210161	0.0521755	G	T
intergenic	ZBTB9(dist=101292),BAK1(dist=13717)	6	33526612	33526612	rs210171	0.203609	A	G
intergenic	ZBTB9(dist=102961),BAK1(dist=12048)	6	33528281	33528281	rs138892259	0.231108	T	C
intergenic	ZBTB9(dist=111477),BAK1(dist=3532)	6	33536797	33536797	rs210133	0.0526418	G	C
ncRNA_intronic	LINC00336	6	33558915	33558915	rs386906	0.0658924	C	T
upstream	LINC00336(dist=572)	6	33561687	33561687	rs210164	0.0517742	G	A
intergenic	LINC00336(dist=2224),ITPR3(dist=25760)	6	33563339	33563339	rs6457734	0.082851	T	G
intergenic	LINC00336(dist=5735),ITPR3(dist=22249)	6	33566850	33566850	rs149893379	0.290958	A	C
intergenic	LINC00336(dist=10187),ITPR3(dist=17797)	6	33571302	33571302	rs35020498	0.0703646	A	T
intergenic	LINC00336(dist=18101),ITPR3(dist=9883)	6	33579216	33579216	rs407415	0.0566993	G	A
intergenic	LINC00336(dist=23524),ITPR3(dist=4460)	6	33584639	33584639	rs6924010	0.0676531	G	A
upstream	ITPR3(dist=67)	6	33589032	33589032	rs6910386	0.129657	G	C
ncRNA_intronic	LOC101929188	6	33601132	33601132	rs9469532	0.050385	A	G
intronic	ITPR3	6	33607103	33607103	rs150273297	0.207919	A	T
intronic	ITPR3	6	33618162	33618162	rs9394159	0.0577563	A	T
intronic	ITPR3	6	33619442	33619442	rs10807127	0.183816	G	A
intronic	ITPR3	6	33620397	33620397	rs1830873	0.0491092	C	G
intronic	ITPR3	6	33626042	33626042	rs73408232	0.253288	T	C
intronic	ITPR3	6	33645457	33645457	rs9469552	0.0687234	G	C
intronic	ITPR3	6	33648661	33648661	rs9469556	0.0686969	G	A
exonic	ITPR3	6	33651129	33651129	rs942636	0.194054	T	C
intronic	UQCC2	6	33677556	33677556	rs9380374	0.0782938	C	A
intronic	IP6K3	6	33695130	33695130	rs2281830	0.105599	G	A
intronic	IP6K3	6	33710696	33710696	rs9348925	0.0790772	C	T
intergenic	IP6K3(dist=10032),LEMD2(dist=14196)	6	33724794	33724794	rs9380376	0.102405	C	T
intergenic	IP6K3(dist=20031),LEMD2(dist=4197)	6	33734793	33734793	rs943469	0.0753866	G	A
UTR3	LEMD2(NM_001348710:c.*674A>G,NM_001348709:c.*674A>G,NM_181336:c.*674A>G,NM_001143944:c.*674A>G)	6	33739731	33739731	rs367875497	0.0740965	T	C
intronic	LEMD2	6	33755890	33755890	rs756137	0.0801254	T	C
upstream	MLN(dist=555)	6	33772335	33772335	rs2281816	0.0740342	A	G
intergenic	MLN(dist=13218),LINC01016(dist=72290)	6	33784998	33784998	rs4607416	0.067291	G	C
intergenic	MLN(dist=16857),LINC01016(dist=68651)	6	33788637	33788637	rs9368777	0.15352	G	C
intergenic	MLN(dist=22825),LINC01016(dist=62683)	6	33794605	33794605	rs9461911	0.067501	C	T
intergenic	MLN(dist=25848),LINC01016(dist=59660)	6	33797628	33797628	rs112733238	0.0636326	A	C
intergenic	MLN(dist=27852),LINC01016(dist=57656)	6	33799632	33799632	rs9461918	0.150693	C	G
intergenic	MLN(dist=32357),LINC01016(dist=53151)	6	33804137	33804137	rs7761859	0.0485772	C	T
intergenic	MLN(dist=38624),LINC01016(dist=46884)	6	33810404	33810404	rs75552893	0.176467	C	T
intergenic	MLN(dist=61136),LINC01016(dist=24372)	6	33832916	33832916	rs3998108	0.102386	A	G
intergenic	MLN(dist=66947),LINC01016(dist=18561)	6	33838727	33838727	rs62397636	0.096808	C	T
intergenic	MLN(dist=74363),LINC01016(dist=11145)	6	33846143	33846143	rs4713711	0.128216	C	T
ncRNA_intronic	LINC01016	6	33864354	33864354	rs7741871	0.101142	A	G
intergenic	MIR7159(dist=33704),MIR1275(dist=67068)	6	33900681	33900681	rs1324578	0.0539975	T	C
intergenic	MIR7159(dist=69948),MIR1275(dist=30824)	6	33936925	33936925	rs7755524	0.145713	G	A
intergenic	MIR7159(dist=85554),MIR1275(dist=15218)	6	33952531	33952531	rs140007014	0.111366	A	G
intergenic	MIR1275(dist=14992),GRM4(dist=3600)	6	33982820	33982820	rs149523415	0.100433	A	G
intronic	GRM4	6	34038597	34038597	rs568421342	0.0698698	A	G
intronic	GRM4	6	34100568	34100568	rs3734360	0.0902994	A	G
intronic	GRM4	6	34113037	34113037	rs563704938	0.118083	C	G
intronic	GRM4	6	34116700	34116700	rs182291280	0.0999735	G	T
intergenic	GRM4(dist=13126),HMGA1(dist=68125)	6	34136525	34136525	rs76862554	0.119098	C	T
intergenic	GRM4(dist=26039),HMGA1(dist=55212)	6	34149438	34149438	rs138705302	0.0871713	A	G
intergenic	GRM4(dist=31253),HMGA1(dist=49998)	6	34154652	34154652	rs145223175	0.0964014	C	T
intronic	NUDT3,RPS10-NUDT3	6	34294602	34294602	rs143188806	0.0896368	G	C
intronic	NUDT3,RPS10-NUDT3	6	34307750	34307750	rs80344099	0.117365	G	C
intronic	NUDT3,RPS10-NUDT3	6	34342542	34342542	rs117409255	0.1172	G	A
intronic	NUDT3,RPS10-NUDT3	6	34351480	34351480	rs146340424	0.0910228	A	G
intronic	RPS10,RPS10-NUDT3	6	34385434	34385434	rs75259239	0.117313	G	C
intronic	PACSIN1	6	34439453	34439453	rs145371853	0.0885509	G	A
intronic	PACSIN1	6	34460494	34460494	rs117499308	0.109764	A	G
intronic	PACSIN1	6	34484872	34484872	rs145938803	0.0832145	A	G
intronic	PACSIN1	6	34492306	34492306	rs75760731	0.107823	A	C
intronic	ILRUN	6	34560737	34560737	rs11755369	0.103998	C	G
intronic	ILRUN	6	34592450	34592450	rs114744895	0.0815203	C	A
intronic	TAF11	6	34851558	34851558	rs116921367	0.0690032	G	A
intronic	ANKS1A	6	34947804	34947804	rs148914899	0.0720985	A	G
intronic	ANKS1A	6	35039183	35039183	rs149743744	0.0644637	C	G
UTR3	ANKS1A(NM_015245:c.*2795A>G)	6	35059181	35059181	rs148040015	0.063637	A	G
intergenic	TCP11(dist=26967),SCUBE3(dist=45579)	6	35136154	35136154	rs186831946	0.07678	T	C
intergenic	TCP11(dist=50821),SCUBE3(dist=21725)	6	35160008	35160008	rs3800397	0.0768144	A	G
UTR3	SCUBE3(NM_152753:c.*161C>A,NM_001303136:c.*161C>A)	6	35216643	35216643	rs115973781	0.0769925	C	A
intronic	ZNF76	6	35233369	35233369	rs188106794	0.0617682	T	C
intronic	PPARD	6	35323888	35323888	rs184579689	0.0526319	A	T
intronic	PPARD	6	35379998	35379998	rs9658142	0.0762537	A	G
intronic	PPARD	6	35386872	35386872	rs36018387	0.0789698	T	C
upstream;downstream	RPL10A(dist=585);FANCE(dist=714)	6	35435593	35435593	rs3823433	0.0756047	A	G
intronic	TEAD3	6	35462413	35462413	rs75490822	0.0830659	T	C
intronic	TULP1	6	35476562	35476562	rs11754612	0.0824107	A	T
intergenic	TULP1(dist=21275),FKBP5(dist=39414)	6	35501948	35501948	rs138807262	0.0707398	A	G
intergenic	TULP1(dist=27858),FKBP5(dist=32831)	6	35508531	35508531	rs11759543	0.0817921	A	G
intergenic	TULP1(dist=32876),FKBP5(dist=27813)	6	35513549	35513549	rs147095608	0.0698998	A	G
intronic	FKBP5	6	35594590	35594590	rs149379406	0.0811195	C	T
intronic	FKBP5	6	35614526	35614526	rs140656232	0.0655713	T	G
intronic	FKBP5	6	35653050	35653050	rs143646441	0.0806901	C	T
ncRNA_intronic	LOC285847	6	35696619	35696619	rs145880472	0.0801543	T	C
intergenic	ARMC12(dist=1981),CLPSL2(dist=25538)	6	35718837	35718837	rs2766552	0.0813493	T	C
intergenic	ARMC12(dist=22358),CLPSL2(dist=5161)	6	35739214	35739214	rs116969632	0.0804967	T	G
intergenic	ARMC12(dist=25288),CLPSL2(dist=2231)	6	35742144	35742144	rs139111810	0.0548653	A	C
intronic	SRPK1	6	35805133	35805133	rs17704843	0.0790149	A	G
intronic	MAPK14	6	36028981	36028981	rs76758079	0.0732512	A	G
intergenic	BRPF3(dist=5515),PNPLA1(dist=4863)	6	36206082	36206082	rs13196184	0.0705586	T	C
intronic	SRSF3	6	36563991	36563991	rs143990994	0.0504672	T	C
intergenic	MIR3925(dist=29522),PANDAR(dist=21587)	6	36619811	36619811	rs77632598	0.0497089	T	C
intergenic	MIR3925(dist=38893),PANDAR(dist=12216)	6	36629182	36629182	rs6932181	0.0497375	T	C
intronic	CDKN1A	6	36647457	36647457	rs3176328	0.0492169	A	C
upstream	PSMC3(dist=523)	11	47448547	47448547	rs61895077	0.0493387	C	G
intronic	RAPSN	11	47462176	47462176	rs78559029	0.0892898	G	A
intronic	PTPMT1	11	47589106	47589106	rs118011483	0.0495489	A	C
intronic	PTPRJ	11	48077411	48077411	rs75874665	0.295849	C	G
intronic	PTPRJ	11	48115606	48115606	rs7130402	0.0726627	G	A
intronic	PTPRJ	11	48162208	48162208	rs35610858	0.379355	C	T
intergenic	PTPRJ(dist=8910),OR4B1(dist=37061)	11	48201301	48201301	rs11039561	0.390311	T	G
intergenic	PTPRJ(dist=22591),OR4B1(dist=23380)	11	48214982	48214982	rs12223266	0.390266	T	G
intergenic	PTPRJ(dist=40581),OR4B1(dist=5390)	11	48232972	48232972	rs10769328	0.391275	T	C
intergenic	OR4B1(dist=13125),OR4X2(dist=14240)	11	48252416	48252416	rs113294115	0.391275	T	C
downstream	OR4X2(dist=289)	11	48267856	48267856	rs67863238	0.392829	C	G
intergenic	OR4X1(dist=1601),OR4S1(dist=39844)	11	48287931	48287931	rs12799818	0.392829	C	T
intergenic	OR4X1(dist=33362),OR4S1(dist=8083)	11	48319692	48319692	rs66954292	0.392829	T	A
exonic	OR4C3	11	48346996	48346996	rs12794960	0.403445	A	G
intergenic	OR4C45(dist=1236),OR4C5(dist=11614)	11	48375235	48375235	rs1384657	0.392985	A	G
intergenic	OR4C5(dist=37236),OR4A47(dist=85069)	11	48425276	48425276	rs150859661	0.399016	T	C
intergenic	OR4C5(dist=57571),OR4A47(dist=64734)	11	48445611	48445611	rs35155832	0.387562	C	T
intergenic	OR4C5(dist=90705),OR4A47(dist=31600)	11	48478745	48478745	rs112949143	0.387562	G	C
intergenic	OR4C5(dist=114855),OR4A47(dist=7450)	11	48502895	48502895	rs112348947	0.387562	A	C
intergenic	OR4A47(dist=11143),TRIM49B(dist=530735)	11	48522417	48522417	rs7936885	0.387664	C	T
intergenic	OR4A47(dist=23950),TRIM49B(dist=517928)	11	48535224	48535224	rs68188415	0.387664	A	G
intergenic	OR4A47(dist=35829),TRIM49B(dist=506049)	11	48547103	48547103	rs67945924	0.387664	A	G
intergenic	OR4A47(dist=43953),TRIM49B(dist=497925)	11	48555227	48555227	rs150495317	0.387664	A	G
intergenic	OR4A47(dist=56246),TRIM49B(dist=485632)	11	48567520	48567520	rs112095687	0.387559	T	C
intergenic	OR4A47(dist=81405),TRIM49B(dist=460473)	11	48592679	48592679	rs113132613	0.387559	T	G
intergenic	OR4A47(dist=98452),TRIM49B(dist=443426)	11	48609726	48609726	rs55935113	0.387559	T	C
intergenic	OR4A47(dist=108646),TRIM49B(dist=433232)	11	48619920	48619920	rs73470675	0.387559	A	G
intergenic	OR4A47(dist=122740),TRIM49B(dist=419138)	11	48634014	48634014	rs144002647	0.387559	A	T
intergenic	OR4A47(dist=150273),TRIM49B(dist=391605)	11	48661547	48661547	rs68077010	0.387559	A	G
intergenic	OR4A47(dist=526506),TRIM49B(dist=15372)	11	49037780	49037780	rs11604358	0.414907	T	C
intergenic	TRIM64C(dist=77219),FOLH1(dist=8761)	11	49157883	49157883	rs4929891	0.145915	A	T
intronic	FOLH1	11	49196155	49196155	rs36067143	0.357645	T	C
intronic	FOLH1	11	49221055	49221055	rs16906205	0.357714	C	G
intergenic	FOLH1(dist=66973),LOC440040(dist=282953)	11	49297127	49297127	rs3862341	0.383886	T	C
intergenic	FOLH1(dist=101368),LOC440040(dist=248558)	11	49331522	49331522	rs12785287	0.386853	T	G
intergenic	FOLH1(dist=143628),LOC440040(dist=206298)	11	49373782	49373782	rs12797853	0.40156	T	G
intergenic	FOLH1(dist=242301),LOC440040(dist=107625)	11	49472455	49472455	rs7109328	0.408918	T	A
intergenic	FOLH1(dist=305341),LOC440040(dist=44585)	11	49535495	49535495	rs2866572	0.409822	G	T
ncRNA_intronic	LOC440040	11	49596466	49596466	rs6485993	0.411453	T	A
ncRNA_intronic	LOC440040	11	49635057	49635057	rs10732505	0.551054	T	C
ncRNA_intronic	LOC440040	11	49671608	49671608	rs10742945	0.551324	C	T
ncRNA_intronic	LOC440040	11	49701271	49701271	rs68052476	0.551178	A	C
ncRNA_intronic	LOC440040	11	49729778	49729778	rs28694395	0.551178	T	C
ncRNA_intronic	LOC440040	11	49748458	49748458	rs371079883	0.551584	T	C
ncRNA_intronic	LOC440040	11	49791685	49791685	rs34381887	0.551738	T	G
ncRNA_intronic	LOC440040	11	49814697	49814697	rs112597048	0.551738	C	T
downstream	LOC440040(dist=921)	11	49832890	49832890	rs12574742	0.551738	A	G
intergenic	LOC440040(dist=23772),OR4C13(dist=118202)	11	49855741	49855741	rs12807804	0.551738	C	A
intergenic	LOC440040(dist=37773),OR4C13(dist=104201)	11	49869742	49869742	rs113542408	0.551738	A	G
intergenic	LOC440040(dist=47349),OR4C13(dist=94625)	11	49879318	49879318	rs28609285	0.552141	A	G
intergenic	LOC440040(dist=58502),OR4C13(dist=83472)	11	49890471	49890471	rs12805458	0.552141	A	C
intergenic	LOC440040(dist=70929),OR4C13(dist=71045)	11	49902898	49902898	rs34547956	0.552141	T	G
intergenic	LOC440040(dist=77575),OR4C13(dist=64399)	11	49909544	49909544	rs12575158	0.552007	T	G
intergenic	LOC440040(dist=89882),OR4C13(dist=52092)	11	49921851	49921851	rs12577197	0.552007	T	C
intergenic	LOC440040(dist=102552),OR4C13(dist=39422)	11	49934521	49934521	rs28861445	0.552141	G	T
intergenic	LOC440040(dist=119127),OR4C13(dist=22847)	11	49951096	49951096	rs12575652	0.552141	T	G
intergenic	LOC440040(dist=136969),OR4C13(dist=5005)	11	49968938	49968938	rs12798870	0.552141	T	C
intergenic	OR4C13(dist=9313),OR4C12(dist=18725)	11	49984284	49984284	rs9783298	0.552141	T	A
intergenic	OR4C13(dist=26483),OR4C12(dist=1555)	11	50001454	50001454	rs35278961	0.552141	A	T
intergenic	OR4C12(dist=29723),LOC441601(dist=205205)	11	50033794	50033794	rs35667828	0.55269	G	C
intergenic	NONE(dist=NONE),TRIM48(dist=7734)	11	55021897	55021897	rs376978232	0.490033	T	C
intergenic	TRIM48(dist=7587),TRIM51HP(dist=15004)	11	55046175	55046175	rs111865899	0.490033	C	T
intergenic	TRIM51HP(dist=6259),OR4A16(dist=38710)	11	55071967	55071967	rs12788154	0.490033	G	T
intergenic	OR4A16(dist=4627),OR4A15(dist=19070)	11	55116290	55116290	rs12789208	0.490033	T	G
intergenic	OR4A15(dist=21307),OR4C15(dist=164044)	11	55157701	55157701	rs35525598	0.481851	G	A
intergenic	OR4A15(dist=53248),OR4C15(dist=132103)	11	55189642	55189642	rs114730832	0.481851	G	T
intergenic	OR4A15(dist=110884),OR4C15(dist=74467)	11	55247278	55247278	rs67936622	0.491475	C	G
intergenic	OR4A15(dist=133638),OR4C15(dist=51713)	11	55270032	55270032	rs12802877	0.491475	T	C
intergenic	OR4A15(dist=153599),OR4C15(dist=31752)	11	55289993	55289993	rs17580126	0.491615	G	C
intergenic	OR4A15(dist=169012),OR4C15(dist=16339)	11	55305406	55305406	rs476822	0.0519444	T	G
intergenic	OR4C15(dist=6463),OR4C16(dist=10049)	11	55329555	55329555	rs72908463	0.477756	A	C
intergenic	OR4C11(dist=2632),OR4P4(dist=31328)	11	55374506	55374506	rs13328851	0.475833	G	A
intergenic	OR4C6(dist=20256),OR5D13(dist=87086)	11	55453828	55453828	rs371005260	0.475134	T	C
intergenic	OR4C6(dist=42823),OR5D13(dist=64519)	11	55476395	55476395	rs3972309	0.487597	C	T
intergenic	OR4C6(dist=51256),OR5D13(dist=56086)	11	55484828	55484828	rs12802732	0.487597	C	T
intergenic	OR4C6(dist=52416),OR5D13(dist=54926)	11	55485988	55485988	rs17147361	0.0520963	A	G
intergenic	OR4C6(dist=59673),OR5D13(dist=47669)	11	55493245	55493245	rs11230787	0.487597	T	G
intergenic	OR4C6(dist=65627),OR5D13(dist=41715)	11	55499199	55499199	rs10897177	0.0520553	T	C
intergenic	OR4C6(dist=66213),OR5D13(dist=41129)	11	55499785	55499785	rs35227909	0.487582	G	C
intergenic	OR4C6(dist=74595),OR5D13(dist=32747)	11	55508167	55508167	rs10897182	0.0730595	T	C
intergenic	OR4C6(dist=74639),OR5D13(dist=32703)	11	55508211	55508211	rs72914374	0.487582	C	A
intergenic	OR4C6(dist=81106),OR5D13(dist=26236)	11	55514678	55514678	rs11230832	0.0520273	C	T
intergenic	OR4C6(dist=83748),OR5D13(dist=23594)	11	55517320	55517320	rs34917892	0.487292	T	C
intergenic	OR4C6(dist=85035),OR5D13(dist=22307)	11	55518607	55518607	rs11230846	0.0519807	A	C
intergenic	OR4C6(dist=86916),OR5D13(dist=20426)	11	55520488	55520488	rs35800303	0.487292	A	G
intergenic	OR4C6(dist=94236),OR5D13(dist=13106)	11	55527808	55527808	rs11230893	0.0520492	G	T
intergenic	OR4C6(dist=94554),OR5D13(dist=12788)	11	55528126	55528126	rs71488999	0.487017	A	G
intergenic	OR4C6(dist=98885),OR5D13(dist=8457)	11	55532457	55532457	rs72918140	0.487017	A	G
intergenic	OR5D13(dist=2348),OR5D14(dist=18826)	11	55544206	55544206	rs10897240	0.0520608	C	T
intergenic	OR5D13(dist=8199),OR5D14(dist=12975)	11	55550057	55550057	rs7943242	0.487292	A	C
intergenic	OR5D14(dist=7077),OR5L1(dist=7790)	11	55571053	55571053	rs12576993	0.487306	A	G
intergenic	OR5D16(dist=22418),TRIM51(dist=21141)	11	55629632	55629632	rs1848559	0.0491248	C	T
intergenic	TRIM51(dist=5942),OR5W2(dist=15900)	11	55665226	55665226	rs368299768	0.362901	G	A
intergenic	TRIM51(dist=6704),OR5W2(dist=15138)	11	55665988	55665988	rs76892297	0.0490626	A	G
intergenic	OR5W2(dist=5699),OR5I1(dist=15175)	11	55687757	55687757	rs7934030	0.363145	A	G
intergenic	OR5W2(dist=8313),OR5I1(dist=12561)	11	55690371	55690371	rs4939008	0.0490761	A	G
upstream	OR7E5P(dist=102)	11	55753983	55753983	rs56146859	0.277086	A	T
intergenic	OR7E5P(dist=1734),OR5F1(dist=5542)	11	55755615	55755615	rs7483803	0.0476441	G	A
intergenic	OR5F1(dist=4129),OR5AS1(dist=31665)	11	55766230	55766230	rs34606233	0.36205	G	C
intergenic	OR5F1(dist=10910),OR5AS1(dist=24884)	11	55773011	55773011	rs2449144	0.0496949	G	C
intergenic	OR5AS1(dist=1374),OR8I2(dist=60541)	11	55800243	55800243	rs1482012	0.0496412	C	T
intergenic	OR5AS1(dist=16305),OR8I2(dist=45610)	11	55815174	55815174	rs2460195	0.0491288	C	A
intergenic	OR5AS1(dist=49348),OR8I2(dist=12567)	11	55848217	55848217	rs7107392	0.0491594	A	G
exonic	OR8H2	11	55872657	55872657	rs28681529	0.117547	C	A
intergenic	OR8J3(dist=16404),OR8K5(dist=5272)	11	55921598	55921598	rs34113041	0.357615	A	C
intergenic	OR8J3(dist=16635),OR8K5(dist=5041)	11	55921829	55921829	rs7128085	0.0485938	A	T
intergenic	OR5J2(dist=11741),OR5T2(dist=42809)	11	55956773	55956773	rs17150147	0.357386	G	T
intergenic	OR5J2(dist=41931),OR5T2(dist=12619)	11	55986963	55986963	rs10791886	0.0483794	G	A
intergenic	OR5J2(dist=43241),OR5T2(dist=11309)	11	55988273	55988273	rs35876547	0.358011	G	C
downstream	OR8H1(dist=405)	11	56057198	56057198	rs9943535	0.357946	G	A
exonic	OR8H1	11	56058197	56058197	rs1842674	0.0483141	G	A
intergenic	OR8K3(dist=4768),OR8K1(dist=22026)	11	56091489	56091489	rs4609621	0.0485808	G	A
intergenic	OR8K1(dist=5353),OR8J1(dist=7864)	11	56119827	56119827	rs57377676	0.0640018	A	G
intergenic	OR5M8(dist=15330),OR5M11(dist=35640)	11	56274176	56274176	rs12277890	0.371934	C	G
intergenic	OR5M8(dist=47927),OR5M11(dist=3043)	11	56306773	56306773	rs9651721	0.372097	A	C
intergenic	OR5M11(dist=18767),OR5M10(dist=14750)	11	56329500	56329500	rs12285776	0.367579	C	G
intergenic	OR5M10(dist=13740),OR5M1(dist=21094)	11	56358937	56358937	rs12284117	0.367658	A	G
intergenic	MIR6128(dist=31300),LINC02735(dist=73197)	11	56542757	56542757	rs1943637	0.288801	T	C
intergenic	MIR6128(dist=47931),LINC02735(dist=56566)	11	56559388	56559388	rs1317264	0.278426	T	A
intergenic	MIR6128(dist=62218),LINC02735(dist=42279)	11	56573675	56573675	rs141394107	0.178041	G	A
intergenic	MIR6128(dist=75599),LINC02735(dist=28898)	11	56587056	56587056	rs61108658	0.2441	A	C
intergenic	MIR6128(dist=90179),LINC02735(dist=14318)	11	56601636	56601636	rs61383392	0.242906	C	T
ncRNA_exonic	LINC02735	11	56643586	56643586	rs1938746	0.0881268	T	C
intergenic	LINC02735(dist=19502),OR5AK2(dist=91333)	11	56665056	56665056	rs17640952	0.1511	T	C
intergenic	LINC02735(dist=102570),OR5AK2(dist=8265)	11	56748124	56748124	rs116953908	0.152056	A	G
intergenic	OR5AK2(dist=31105),OR5AK4P(dist=16586)	11	56788423	56788423	rs138238752	0.0987169	A	G
intergenic	OR5AK4P(dist=11285),LRRC55(dist=132207)	11	56817220	56817220	rs79451270	0.1291	A	C
intergenic	OR5AK4P(dist=23773),LRRC55(dist=119719)	11	56829708	56829708	rs118024256	0.144399	T	C
intergenic	OR5AK4P(dist=91755),LRRC55(dist=51737)	11	56897690	56897690	rs118113160	0.152913	A	G
intergenic	APLNR(dist=31895),TNKS1BP1(dist=30294)	11	57036822	57036822	rs61622210	0.0790909	A	G
intronic	TNKS1BP1	11	57074745	57074745	rs75419177	0.0825301	T	C
intergenic	SLC43A3(dist=17983),RTN4RL2(dist=14965)	11	57213036	57213036	rs146424536	0.0516478	G	A

## Sheet: S Table 3
Supplementary Table 3: Annotation of SNPs identified as outliers with high FST in the exon region using ANNOVAR
Variant_Type	Gene_Transcript_Info	Chromosome	Start_Position	End_Position	Reference_Allele	Alternate_Allele	FST
synonymous SNV	H3C3:NM_003531:exon1:c.C99G:p.T33T,	6	26045737	26045737	C	G	0.0632734
synonymous SNV	OR1F12:NM_001355425:exon1:c.A884A:p.N295N,	6	28041977	28041977	G	A	0.118863
synonymous SNV	NKAPL:NM_001007531:exon1:c.A287A:p.Y96Y,	6	28227436	28227436	G	A	0.0599533
synonymous SNV	OR2J1:NM_001348294:exon1:c.G297G:p.T99T,	6	29069016	29069016	A	G	0.063203
synonymous SNV	OR10C1:NM_013941:exon1:c.A736A:p.M246M,	6	29408528	29408528	G	A	0.0871536
synonymous SNV	GABBR1:NM_021903:exon11:c.T1626T:p.F542F,GABBR1:NM_001470:exon16:c.T1977T:p.F659F,GABBR1:NM_001319053:exon16:c.T1446T:p.F482F,GABBR1:NM_021904:exon15:c.T1791T:p.F597F,	6	29576393	29576393	G	A	0.158853
nonsynonymous SNV	HLA-A:NM_001242758:exon2:c.C256G:p.Q86E,HLA-A:NM_002116:exon2:c.C256G:p.Q86E,	6	29910716	29910716	C	G	0.0998428
nonsynonymous SNV	HLA-A:NM_001242758:exon2:c.G301A:p.D101N,HLA-A:NM_002116:exon2:c.G301A:p.D101N,	6	29910761	29910761	G	A	0.10563
synonymous SNV	MUCL3:NM_080870:exon2:c.G3637G:p.G1213G,	6	30919878	30919878	C	G	0.328018
synonymous SNV	MUC22:NM_001318484:exon3:c.A334A:p.R112R,MUC22:NM_001322469:exon3:c.A334A:p.R112R,MUC22:NM_001198815:exon3:c.A325A:p.R109R,	6	30993533	30993533	G	A	0.136695
synonymous SNV	MUC22:NM_001318484:exon3:c.A391A:p.I131I,MUC22:NM_001322469:exon3:c.A391A:p.I131I,MUC22:NM_001198815:exon3:c.A382A:p.I128I,	6	30993590	30993590	G	A	0.129878
synonymous SNV	MUC22:NM_001318484:exon3:c.A759G:p.A253A,MUC22:NM_001322469:exon3:c.A759G:p.A253A,MUC22:NM_001198815:exon3:c.A750G:p.A250A,	6	30993958	30993958	A	G	0.107695
synonymous SNV	MUC22:NM_001318484:exon3:c.G4617T:p.T1539T,MUC22:NM_001322469:exon4:c.G4617T:p.T1539T,MUC22:NM_001198815:exon3:c.G4608T:p.T1536T,	6	30997816	30997816	G	T	0.120247
synonymous SNV	MUC22:NM_001318484:exon5:c.C5232C:p.H1744H,MUC22:NM_001322469:exon6:c.C5232C:p.H1744H,MUC22:NM_001198815:exon5:c.C5223C:p.H1741H,	6	31002616	31002616	T	C	0.157485
synonymous SNV	CCHCR1:NM_001105563:exon13:c.C1659T:p.D553D,CCHCR1:NM_001105564:exon13:c.C1767T:p.D589D,CCHCR1:NM_019052:exon13:c.C1500T:p.D500D,	6	31113052	31113052	G	A	0.112697
synonymous SNV	CCHCR1:NM_001105563:exon12:c.G1617G:p.Q539Q,CCHCR1:NM_001105564:exon12:c.G1725G:p.Q575Q,CCHCR1:NM_019052:exon12:c.G1458G:p.Q486Q,	6	31113239	31113239	G	C	0.464206
synonymous SNV	HLA-C:NM_002117:exon3:c.T539T:p.L180L,HLA-C:NM_001243042:exon3:c.T539T:p.L180L,	6	31238930	31238930	C	A	0.132379
synonymous SNV	HLA-C:NM_002117:exon2:c.A126A:p.G42G,HLA-C:NM_001243042:exon2:c.A126A:p.G42G,	6	31239593	31239593	C	T	0.128998
synonymous SNV	HLA-B:NM_005514:exon4:c.T756T:p.T252T,	6	31323233	31323233	G	A	0.138104
synonymous SNV	HLA-B:NM_005514:exon4:c.C668C:p.A223A,	6	31323321	31323321	A	G	0.4297
synonymous SNV	HLA-B:NM_005514:exon3:c.G486G:p.T162T,	6	31324077	31324077	G	C	0.145776
synonymous SNV	HLA-B:NM_005514:exon3:c.C369T:p.Y123Y,	6	31324194	31324194	G	A	0.115294
synonymous SNV	HLA-B:NM_005514:exon2:c.C165C:p.T55T,	6	31324643	31324643	C	G	0.120828
nonsynonymous SNV	HLA-B:NM_005514:exon2:c.T103G:p.S35A,	6	31324705	31324705	A	C	0.116136
synonymous SNV	PRRC2A:NM_080686:exon26:c.C5649C:p.P1883P,PRRC2A:NM_004638:exon26:c.C5649C:p.P1883P,	6	31604010	31604010	G	C	0.125234
synonymous SNV	CFB:NM_001710:exon2:c.C94C:p.R32R,	6	31914179	31914179	T	C	0.354146
synonymous SNV	SKIV2L:NM_006929:exon11:c.A1200A:p.T400T,	6	31930351	31930351	G	A	0.139167
unknown	UNKNOWN	6	31977998	31977998	G	T	0.113547
synonymous SNV	CYP21A2:NM_001128590:exon6:c.C657C:p.L219L,CYP21A2:NM_001368143:exon7:c.C342C:p.L114L,CYP21A2:NM_000500:exon7:c.C747C:p.L249L,CYP21A2:NM_001368144:exon6:c.C342C:p.L114L,	6	32007790	32007790	G	C	0.0982958
synonymous SNV	TNXB:NM_001365276:exon36:c.G11629G:p.V3877V,TNXB:NM_032470:exon5:c.G916G:p.V306V,TNXB:NM_019105:exon36:c.G11623G:p.V3875V,	6	32011235	32011235	T	C	0.123119
synonymous SNV	TNXB:NM_001365276:exon33:c.G11142G:p.T3714T,TNXB:NM_032470:exon2:c.G429G:p.T143T,TNXB:NM_019105:exon33:c.G11136G:p.T3712T,	6	32012279	32012279	T	C	0.356917
synonymous SNV	TNXB:NM_001365276:exon19:c.C6696C:p.D2232D,TNXB:NM_019105:exon19:c.C6696C:p.D2232D,	6	32032743	32032743	A	G	0.108409
nonsynonymous SNV	PPT2:NM_001204103:exon2:c.C15G:p.C5W,PPT2:NM_138717:exon2:c.C33G:p.C11W,PPT2:NM_005155:exon2:c.C15G:p.C5W,	6	32122386	32122386	C	G	0.338887
synonymous SNV	BTNL2:NM_001304561:exon5:c.A1078A:p.S360S,	6	32363816	32363816	C	T	0.123164
nonsynonymous SNV	BTNL2:NM_001304561:exon3:c.A586G:p.K196E,	6	32370835	32370835	T	C	0.0985612
synonymous SNV	HLA-DQB2:NM_001300790:exon4:c.C687C:p.G229G,	6	32725620	32725620	A	G	0.100044
synonymous SNV	HLA-DPA1:NM_001242524:exon3:c.C204C:p.D68D,HLA-DPA1:NM_033554:exon2:c.C204C:p.D68D,HLA-DPA1:NM_001242525:exon3:c.C204C:p.D68D,	6	33037560	33037560	A	G	0.179089
nonsynonymous SNV	HLA-DPB1:NM_002121:exon2:c.C251A:p.A84D,	6	33048599	33048599	C	A	0.144551
nonsynonymous SNV	HLA-DPB1:NM_002121:exon2:c.C254A:p.A85E,	6	33048602	33048602	C	A	0.0655815
synonymous SNV	HLA-DPB1:NM_002121:exon3:c.C619C:p.L207L,	6	33052981	33052981	A	C	0.171222
synonymous SNV	ITPR3:NM_002224:exon35:c.C4743C:p.P1581P,	6	33651129	33651129	T	C	0.194054
synonymous SNV	OR4C3:NM_001004702:exon1:c.G423G:p.M141M,	11	48346996	48346996	A	G	0.403445
synonymous SNV	OR8H2:NM_001005200:exon1:c.A139A:p.I47I,	11	55872657	55872657	C	A	0.117547
synonymous SNV	OR8H1:NM_001005199:exon1:c.C342T:p.L114L,	11	56058197	56058197	G	A	0.0483141

## Sheet: S Fig. 2
Supplementary Figure 2. Genetic differentiation among four newly designated clusters measured using FST

## Sheet: S Table 4
Supplementary Table 4. Basic information across newly assigned clusters and entire populationa
Characteristics	Cluster 1*	Cluster 2	Cluster 3	Cluster 4	Total
Participants (N/%)	28,015 (65.1)	6,658 (15.2)	4,876 (11.2)	4,177 (9.6)	43,726 (100)
Male (N/%)	14,193(50.7)	3,364 (50.5)	2,504 (51.4)	2,062 (49.4)	22,123 (50.6)
Age (mean±SD)	45±9.7	45±9.7	45±9.6	45±9.6	45±9.7
BMI (mean±SD)	22±3.5	23±3.6	22±3.4	22±3.5	22±3.5
Heavy drinkerb (N/%)	4,396 (15.7)	1,049 (15.8)	764 (15.7)	662 (15.8)	6,871 (15.7)
High blood glucosec (N/%)	979 (3.5)	214 (3.2)	166 (3.4)	134 (3.2)	1,493 (3.4)
Smoking status (N/%)	3,972 (14.2)	940 (14.1)	675 (13.8)	619 (14.8)	6,206 (14.2)
a Values are number (percentage) unless otherwise described. SD: standard deviation
b Heavy drinkers are defined as who drink more than 6 times per week in the baseline survey.
c High blood glucose is defined as who answered ''yes'' to the question ''Have you been diagnosed with high blood sugar? (Fasting blood sugar: 126 mg/dL or higher, or HbA1c: 6.5% or higher)''
d Smoking status is defined as who answered ''yes'' to the question ''Do you smoke cigarettes''.

## Sheet: S Fig. 3
Supplementary Figure 3. Overview of ancestral estimations across the entire range of k values from 2 to 12 in the ADMIXTURE analysis

## Sheet: S Table 5
Supplementary Table 5. Lead SNPs and genomic loci for genetic clusters
Cluster	No	GenomicLocus	uniqID	rsID	chr	pos	p	nIndSigSNPs	IndSigSNPs
1*	1	1	6:21561088:A:G	rs190373994	6	21561088	1.262e-16	9	rs190373994;rs72826303;rs11759616;rs7760082;rs11751260;rs17261487;rs2744132;rs56126921;rs11970030
1*	2	1	6:21866147:A:G	rs560003547	6	21866147	5.723e-16	2	rs560003547;rs11970030
1*	3	1	6:21944707:C:T	rs6906731	6	21944707	1.622e-09	1	rs6906731
1*	4	1	6:22041133:A:G	rs2328662	6	22041133	1.892e-15	1	rs2328662
1*	5	1	6:22351005:A:C	rs2655446	6	22351005	8.806e-09	1	rs2655446
1*	6	1	6:22462447:C:T	rs9358547	6	22462447	1.971e-17	3	rs9358547;rs6920470;rs2744132
1*	7	1	6:22711757:A:T	rs9358581	6	22711757	1.369e-10	1	rs9358581
1*	8	1	6:23122997:C:T	rs6456523	6	23122997	1.285e-08	1	rs6456523
1*	9	1	6:23241970:G:T	rs78702151	6	23241970	1.198e-49	7	rs78702151;rs77038765;rs2744132;rs56126921;rs141877826;rs36029180;rs116631002
1*	10	1	6:23323761:C:T	rs185189105	6	23323761	1.527e-15	2	rs185189105;rs142049635
1*	11	1	6:23378951:G:T	rs1925458	6	23378951	5.828e-11	1	rs1925458
1*	12	1	6:23404276:C:T	rs7775425	6	23404276	1.358e-17	1	rs7775425
1*	13	1	6:23446947:C:T	rs6456551	6	23446947	2.661e-86	5	rs6456551;rs197963;rs77038765;rs73727537;rs116631002
1*	14	1	6:23490749:C:G	rs9460883	6	23490749	2.58e-22	1	rs9460883
1*	15	1	6:23506477:C:T	rs719437	6	23506477	5.448e-68	2	rs719437;rs12189677
1*	16	1	6:23649645:A:G	rs1321913	6	23649645	1.49e-14	1	rs1321913
1*	17	1	6:23685117:C:T	rs12191169	6	23685117	6.985e-13	5	rs12191169;rs2328780;rs34114432;rs9379536;rs526263
1*	18	1	6:23709107:A:G	rs2038827	6	23709107	2.989e-45	4	rs2038827;rs2328780;rs34114432;rs6922292
1*	19	1	6:23856148:A:G	rs77658397	6	23856148	1.585e-21	3	rs77658397;rs6922292;rs34114432
1*	20	1	6:23909811:A:C	rs481314	6	23909811	1.817e-21	1	rs481314
1*	21	1	6:23934310:C:T	rs540748	6	23934310	7.183e-14	2	rs540748;rs1511466
1*	22	1	6:23942549:C:T	rs113004122	6	23942549	5.808e-45	2	rs113004122;rs9348623
1*	23	1	6:23960520:A:G	rs117379952	6	23960520	3.377e-13	1	rs117379952
1*	24	1	6:23962105:G:T	rs578632	6	23962105	9.619e-18	2	rs578632;rs9348623
1*	25	1	6:23964851:A:G	rs707876	6	23964851	5.394e-09	1	rs707876
1*	26	1	6:24013982:C:T	rs1511481	6	24013982	4.609e-08	2	rs1511481;rs9348623
1*	27	1	6:24021521:C:T	rs35979081	6	24021521	1.438e-48	1	rs35979081
1*	28	1	6:24035042:C:G	rs9358742	6	24035042	1.565e-09	1	rs9358742
1*	29	1	6:24070585:A:G	rs1343622	6	24070585	1.25e-10	1	rs1343622
1*	30	1	6:24078187:C:T	rs2683638	6	24078187	6.532e-12	2	rs2683638;rs9356920
1*	31	1	6:24105447:A:G	rs9379643	6	24105447	9.071e-35	2	rs9379643;rs3178
1*	32	1	6:24163814:A:G	rs61528653	6	24163814	1.334e-18	1	rs61528653
1*	33	1	6:24169966:A:C	rs148847524	6	24169966	2.332e-56	3	rs148847524;rs143231436;rs12196541
1*	34	1	6:24219530:C:T	rs1622103	6	24219530	1.339e-104	4	rs1622103;rs3846829;rs2753912;rs3178
1*	35	1	6:24250945:C:T	rs78120860	6	24250945	2.449e-66	4	rs78120860;rs150895593;rs117518521;rs142049635
1*	36	1	6:24277488:C:T	rs9393547	6	24277488	1.797e-13	3	rs9393547;rs116730488;rs12196541
1*	37	1	6:24311559:G:T	rs79134990	6	24311559	7.5e-10	1	rs79134990
1*	38	1	6:24391075:A:G	rs793676	6	24391075	2.922e-85	3	rs793676;rs7754778;rs9467176
1*	39	1	6:24451256:A:G	rs6456614	6	24451256	7.094e-40	4	rs6456614;rs7754778;rs2753912;rs2273605
1*	40	1	6:24468927:A:G	rs2744563	6	24468927	1.659e-132	4	rs2744563;6:25003339;rs78612998;rs138711481
1*	41	1	6:24502123:A:G	rs9467203	6	24502123	1.576e-136	4	rs9467203;rs79232381;rs807514;rs2817244
1*	42	1	6:24507519:C:T	rs4646838	6	24507519	1.465e-09	1	rs4646838
1*	43	1	6:24545334:C:T	rs536104843	6	24545334	5.24e-09	1	rs536104843
1*	44	1	6:24548972:C:T	rs807531	6	24548972	8.784e-56	4	rs807531;rs6915373;rs2273605;rs7754778
1*	45	1	6:24650671:C:T	rs707887	6	24650671	3.584e-18	4	rs707887;rs7765052;rs6941866;rs13204166
1*	46	1	6:24650761:A:G	rs3087943	6	24650761	2.929e-17	2	rs3087943;rs116596225
1*	47	1	6:24654443:C:T	rs3181238	6	24654443	3.152e-102	5	rs3181238;rs7765052;rs60555264;rs6941866;rs6915373
1*	48	1	6:24734952:A:G	rs148523288	6	24734952	3.957e-09	1	rs148523288
1*	49	1	6:24764788:A:G	rs1980643	6	24764788	2.333e-70	2	rs1980643;rs9366581
1*	50	1	6:24771431:A:C	rs2493333	6	24771431	1.835e-31	3	rs2493333;rs9366581;rs2754772
1*	51	1	6:24789879:A:G	rs73396439	6	24789879	2.639e-12	2	rs73396439;rs116596225
1*	52	1	6:24799327:C:G	rs139126471	6	24799327	1.258e-302	6	rs139126471;rs190550152;rs138191414;rs12197384;rs6902039;rs7771169
1*	53	1	6:24830306:C:G	rs56733961	6	24830306	2.064e-65	6	rs56733961;rs79868980;rs3813680;rs7765052;rs2754772;rs9366581
1*	54	1	6:24844443:C:T	rs10946731	6	24844443	6.749e-24	1	rs10946731
1*	55	1	6:24902113:A:G	rs2817726	6	24902113	1.42e-23	3	rs2817726;rs4431425;rs6930916
1*	56	1	6:24916731:A:C	rs138093034	6	24916731	2.86e-277	5	rs138093034;6:25329362;rs77038765;rs73727537;rs115894968
1*	57	1	6:24928081:A:G	rs55927112	6	24928081	1.554e-92	2	rs55927112;rs138711481
1*	58	1	6:24942042:A:G	rs13202601	6	24942042	2.766e-21	1	rs13202601
1*	59	1	6:24948146:A:G	rs1739316	6	24948146	1.154e-24	2	rs1739316;rs6930916
1*	60	1	6:24951199:A:G	rs647297	6	24951199	5.166e-09	1	rs647297
1*	61	1	6:24951809:A:G	rs387628	6	24951809	7.187e-91	1	rs387628
1*	62	1	6:24962043:C:T	rs386732	6	24962043	5.002e-66	3	rs386732;rs117518521;rs150895593
1*	63	1	6:25013982:A:G	rs61176793	6	25013982	6.093e-16	1	rs61176793
1*	64	1	6:25028200:A:C	rs9356958	6	25028200	1.348e-130	2	rs9356958;rs9348651
1*	65	1	6:25059066:A:C	rs145627221	6	25059066	2.689e-09	1	rs145627221
1*	66	1	6:25077007:G:T	rs143743502	6	25077007	2.636e-10	1	rs143743502
1*	67	1	6:25088919:G:T	rs16890032	6	25088919	2.808e-12	2	rs16890032;rs59401719
1*	68	1	6:25105361:G:T	rs302988	6	25105361	1.211e-144	2	rs302988;rs59401719
1*	69	1	6:25141224:C:T	rs3749873	6	25141224	7.349e-254	2	rs3749873;6:25003339
1*	70	1	6:25166966:G:T	rs180764590	6	25166966	2.818e-11	1	rs180764590
1*	71	1	6:25170501:A:G	rs12529629	6	25170501	1.493e-08	1	rs12529629
1*	72	1	6:25172641:G:T	rs9467434	6	25172641	2.019e-167	2	rs9467434;rs5008131
1*	73	1	6:25180079:C:T	rs141544289	6	25180079	2.646e-19	1	rs141544289
1*	74	1	6:25283500:A:G	rs9358849	6	25283500	1.373e-106	9	rs9358849;rs78904078;rs2690123;rs2690112;rs11754685;rs2690059;rs5008131;rs9379740;rs9393632
1*	75	1	6:25292401:C:T	rs10456320	6	25292401	8.086e-26	4	rs10456320;rs6936496;rs9461153;rs12201737
1*	76	1	6:25338021:G:T	rs2744227	6	25338021	2.017e-22	3	rs2744227;rs2690059;rs2690112
1*	77	1	6:25347646:G:T	rs6456671	6	25347646	9.464e-50	2	rs6456671;rs78904078
1*	78	1	6:25363994:A:G	rs147645822	6	25363994	4.024e-11	2	rs147645822;rs12663563
1*	79	1	6:25379926:C:T	rs4711082	6	25379926	1.24e-114	5	rs4711082;rs2182931;rs2690123;rs2744306;rs2690059
1*	80	1	6:25389671:G:T	rs77016882	6	25389671	5.925e-15	5	rs77016882;rs75673308;rs12201737;6:25329362;rs76513426
1*	81	1	6:25411187:C:T	rs146458991	6	25411187	1.678e-223	3	rs146458991;rs117115513;rs16890551
1*	82	1	6:25412628:A:G	rs927986	6	25412628	2.296e-101	2	rs927986;rs2690059
1*	83	1	6:25414846:A:G	rs1927693	6	25414846	8.063e-15	4	rs1927693;rs7761140;rs9366624;rs62392388
1*	84	1	6:25415845:A:G	rs11752825	6	25415845	6.68e-131	5	rs11752825;rs7761140;rs9366624;rs62392388;rs6934330
1*	85	1	6:25420514:C:T	rs142089862	6	25420514	3.57e-123	3	rs142089862;rs150895593;rs117518521
1*	86	1	6:25423879:C:T	rs72831251	6	25423879	7.352e-41	3	rs72831251;rs75650328;rs76417859
1*	87	1	6:25424256:A:G	rs12213948	6	25424256	5.106e-114	3	rs12213948;rs9366624;rs62392388
1*	88	1	6:25432656:C:T	rs56293509	6	25432656	2.219e-10	2	rs56293509;rs114841243
1*	89	1	6:25435552:A:G	rs76448003	6	25435552	6.624e-52	3	rs76448003;rs62392388;rs576904363
1*	90	1	6:25488583:C:T	rs2274089	6	25488583	2.298e-24	3	rs2274089;rs12207674;rs932316
1*	91	1	6:25498307:C:T	rs74604429	6	25498307	2.998e-08	1	rs74604429
1*	92	1	6:25499976:A:G	rs16890663	6	25499976	2.794e-36	3	rs16890663;rs12207674;rs932316
1*	93	1	6:25517923:C:G	rs301374	6	25517923	4.001e-25	3	rs301374;rs214066;rs114841243
1*	94	1	6:25614457:C:T	rs188325651	6	25614457	5.256e-09	1	rs188325651
1*	95	1	6:25622233:A:G	rs941428	6	25622233	1.231e-284	6	rs941428;rs932316;rs6924948;rs9393668;rs12525553;rs12207674
1*	96	1	6:25664981:A:T	rs9393654	6	25664981	1.361e-22	2	rs9393654;rs214066
1*	97	1	6:25692021:C:T	rs76772871	6	25692021	6.722e-22	3	rs76772871;rs140387790;rs2237227
1*	98	1	6:25703529:A:C	rs76703022	6	25703529	2.223e-63	7	rs76703022;rs6924948;rs117462666;rs116956053;rs9393668;rs717551;rs72834629
1*	99	1	6:25750896:A:G	rs191929921	6	25750896	2.78e-132	2	rs191929921;rs113936133
1*	100	1	6:25773744:G:T	rs80230923	6	25773744	1.256e-12	1	rs80230923
1*	101	1	6:25951260:C:T	rs6907991	6	25951260	1.599e-11	4	rs6907991;rs12210098;rs72834629;rs717551
1*	102	1	6:25960799:C:T	rs117965842	6	25960799	2.679e-29	2	rs117965842;rs116992770
1*	103	1	6:26089098:C:T	rs9366637	6	26089098	2.742e-297	7	rs9366637;rs6924948;rs9393668;rs717551;rs9295676;rs12210098;rs72834629
1*	104	1	6:26107463:A:G	rs198846	6	26107463	2.132e-85	5	rs198846;rs6456691;rs72830103;rs12210098;rs549696721
1*	105	1	6:26160555:C:G	rs142344691	6	26160555	6.179e-16	3	rs142344691;rs118006439;rs549696721
1*	106	1	6:26174450:A:G	rs138275828	6	26174450	2.676e-10	1	rs138275828
1*	107	1	6:26205770:A:C	rs9393687	6	26205770	2.382e-74	2	rs9393687;rs140007781
1*	108	1	6:26237068:A:G	rs80292109	6	26237068	1.142e-226	5	rs80292109;rs77926209;rs113507773;rs55964643;rs4145878
1*	109	1	6:26272288:C:T	rs3734535	6	26272288	3.732e-09	2	rs3734535;rs76971624
1*	110	1	6:26335373:C:T	rs113218058	6	26335373	6.935e-22	2	rs113218058;rs113507773
1*	111	1	6:26404680:A:G	rs1796519	6	26404680	2.715e-37	4	rs1796519;rs9295689;rs117043828;rs55964643
1*	112	1	6:26410486:G:T	6:26410486	6	26410486	5.074e-23	5	6:26410486;rs140387790;rs2237227;rs140007781;rs141454221
1*	113	1	6:26443305:A:G	rs188713930	6	26443305	2.93e-26	1	rs188713930
1*	114	1	6:26486512:A:C	6:26486512	6	26486512	7.458e-14	3	6:26486512;6:27015751;rs184466620
1*	115	1	6:26650110:A:T	rs138644763	6	26650110	3.778e-09	2	rs138644763;rs117043828
1*	116	1	6:26681071:C:T	rs142076412	6	26681071	4.287e-31	2	rs142076412;rs76971624
1*	117	1	6:26880157:C:T	rs3999347	6	26880157	9.576e-26	2	rs3999347;rs3925875
1*	118	1	6:26888304:C:T	rs187242505	6	26888304	2.792e-102	7	rs187242505;rs12201159;rs117453392;rs148071656;rs12201802;rs2130655;rs3925875
1*	119	1	6:26896918:C:T	6:26896918	6	26896918	4.271e-12	1	6:26896918
1*	120	1	6:27158602:A:G	rs181617193	6	27158602	1.548e-12	2	rs181617193;rs566962549
1*	121	1	6:27251856:C:G	rs140908254	6	27251856	7.038e-13	3	rs140908254;rs575185218;rs144465147
1*	122	1	6:27263351:C:T	rs151312243	6	27263351	1.456e-17	4	rs151312243;rs145354291;rs77396427;rs115912638
1*	123	1	6:27302848:A:G	rs9348762	6	27302848	1.556e-305	12	rs9348762;rs9368503;rs117453392;rs148071656;rs2073526;rs9295689;rs2130655;rs3925875;rs12201159;rs1102565;rs566962549;rs2092114
1*	124	1	6:27308005:A:G	rs149260225	6	27308005	3.326e-143	1	rs149260225
1*	125	1	6:27525697:A:T	6:27525697	6	27525697	5.438e-12	2	6:27525697;rs12201159
1*	126	1	6:27532309:A:C	rs139484815	6	27532309	2.084e-300	3	rs139484815;rs76033823;rs9379966
1*	127	1	6:27546720:A:G	rs150397879	6	27546720	1.693e-30	3	rs150397879;rs189451831;rs148900334
1*	128	1	6:27879551:C:G	rs9368537	6	27879551	4.68e-106	8	rs9368537;rs169431;rs117680617;rs117315101;rs74328437;rs142970147;rs117183430;rs149878
1*	129	1	6:27982501:A:C	6:27982501	6	27982501	2.204e-21	2	6:27982501;6:28325571
1*	130	1	6:28003222:C:T	rs184084677	6	28003222	1.948e-113	7	rs184084677;rs169431;rs1150678;rs141442317;rs2235359;rs74967533;rs149878
1*	131	1	6:28036788:A:C	rs573149595	6	28036788	5.24e-22	3	rs573149595;rs141442317;rs142154697
1*	132	1	6:28079956:A:G	rs7739332	6	28079956	8.328e-46	7	rs7739332;rs1150678;rs12000;rs2859356;rs209127;rs2294480;rs169431
1*	133	1	6:28121843:A:G	rs79777367	6	28121843	3.461e-14	6	rs79777367;rs117315101;rs139057698;rs76971624;rs148472072;rs117680617
1*	134	1	6:28225296:A:G	rs149204020	6	28225296	6.707e-50	6	rs149204020;6:28325571;rs181075692;6:28713434;rs145354291;rs77396427
1*	135	1	6:28275586:C:G	rs151080251	6	28275586	4.952e-08	1	rs151080251
1*	136	1	6:28278112:A:C	rs113710928	6	28278112	7.229e-22	4	rs113710928;rs148900334;rs139614182;rs142445164
1*	137	1	6:28326490:A:G	rs213232	6	28326490	6.449e-223	11	rs213232;rs2859356;rs62402390;rs9257158;rs3131088;rs9283885;rs2294480;rs149878;rs169431;rs34024998;rs12000
1*	138	1	6:28464927:A:T	rs183719819	6	28464927	2.683e-84	2	rs183719819;rs12206581
1*	139	1	6:28500911:A:C	rs571726149	6	28500911	7.031e-43	2	rs571726149;6:28325571
1*	140	1	6:28632345:A:G	rs151327481	6	28632345	5.003e-28	6	rs151327481;rs9257182;rs41316602;rs4599679;rs190359016;rs559061440
1*	141	1	6:28647722:C:T	rs117585327	6	28647722	8.19e-73	3	rs117585327;rs117846312;rs148672491
1*	142	1	6:28669315:A:G	rs6939576	6	28669315	1.858e-111	5	rs6939576;rs7763390;rs9257182;rs9283885;rs12206581
1*	143	1	6:28677498:A:G	rs139675877	6	28677498	3.181e-70	3	rs139675877;6:28713434;rs77396427
1*	144	1	6:28684132:C:T	rs115397636	6	28684132	9.193e-26	1	rs115397636
1*	145	1	6:28712322:A:G	rs139728037	6	28712322	8.835e-48	7	rs139728037;rs117847335;rs7745220;rs149597426;rs576366083;rs116973845;rs148656136
1*	146	1	6:28777880:C:T	rs186187027	6	28777880	1.022e-30	5	rs186187027;rs181751959;6:29370429;rs181075692;rs148286685
1*	147	1	6:28898654:A:G	rs180803647	6	28898654	1.29e-23	3	rs180803647;rs117068328;rs189451831
1*	148	1	6:28939117:C:T	rs12055619	6	28939117	6.784e-123	8	rs12055619;rs3131088;rs3117340;rs181752128;rs1419640;rs7349908;rs150971595;rs209127
1*	149	1	6:28956541:C:T	rs112421807	6	28956541	2.014e-31	6	rs112421807;rs9283885;rs2235359;rs12206581;rs7763390;rs9257182
1*	150	1	6:29038857:A:G	rs149704780	6	29038857	3.268e-143	3	rs149704780;rs16894983;rs29263
1*	151	1	6:29065855:A:G	rs145263686	6	29065855	7.291e-295	3	rs145263686;rs76033823;rs4599679
1*	152	1	6:29173805:C:T	rs143256812	6	29173805	7.087e-13	2	rs143256812;rs116973845
1*	153	1	6:29229480:A:G	6:29229480	6	29229480	2.194e-143	2	6:29229480;6:28940186
1*	154	1	6:29289929:C:T	rs146185592	6	29289929	1.509e-44	5	rs146185592;rs151001546;rs117181567;rs139614182;rs139494877
1*	155	1	6:29306656:C:T	rs9257745	6	29306656	1.057e-279	8	rs9257745;rs3930883;rs77454196;rs12206581;rs7763390;rs7745220;rs9283885;rs35095140
1*	156	1	6:29335080:A:C	rs148472353	6	29335080	1.751e-17	2	rs148472353;rs138059097
1*	157	1	6:29355494:A:C	rs1419639	6	29355494	1.529e-124	9	rs1419639;rs151001546;rs9468541;rs41317798;rs117181567;rs139614182;rs139494877;rs41316618;rs7754926
1*	158	1	6:29359024:A:G	6:29359024	6	29359024	7.003e-34	1	6:29359024
1*	159	1	6:29361707:G:T	rs16894836	6	29361707	3.651e-248	3	rs16894836;rs3930883;rs1419640
1*	160	1	6:29427068:A:G	rs59818916	6	29427068	6.297e-53	6	rs59818916;rs148900334;rs58669168;rs41316602;rs142445164;rs60544848
1*	161	1	6:29441502:A:G	rs117137251	6	29441502	4.264e-29	2	rs117137251;rs142154697
1*	162	1	6:29451845:C:T	rs118077891	6	29451845	2.894e-21	2	rs118077891;6:29503087
1*	163	1	6:29474824:G:T	rs734962	6	29474824	1.603e-188	3	rs734962;rs2745401;rs16894983
1*	164	1	6:29504183:C:T	6:29504183	6	29504183	9.636e-16	1	6:29504183
1*	165	1	6:29530868:C:T	rs362529	6	29530868	6.349e-230	10	rs362529;rs117181567;rs1233388;rs29263;rs9461540;rs41316618;rs151001546;rs16894983;rs9468541;rs41317798
1*	166	1	6:29538403:C:G	rs1003582	6	29538403	7.867e-157	2	rs1003582;rs1233388
1*	167	1	6:29541910:A:G	rs138633183	6	29541910	5.548e-18	1	rs138633183
1*	168	1	6:29555585:A:G	rs17184367	6	29555585	2.021e-38	5	rs17184367;rs9468561;rs150971595;rs362525;rs1233388
1*	169	1	6:29602881:A:G	6:29602881	6	29602881	3.878e-20	1	6:29602881
1*	170	1	6:29603136:A:C	rs3095270	6	29603136	9.216e-153	3	rs3095270;rs1233388;rs9468561
1*	171	1	6:29606761:A:G	rs3095268	6	29606761	2.896e-120	2	rs3095268;rs362525
1*	172	1	6:29614627:C:G	rs7774576	6	29614627	5.071e-171	3	rs7774576;rs117680413;rs116963310
1*	173	2	6:33172932:A:G	rs110662	6	33172932	5.366e-16	1	rs110662
1*	174	2	6:33222194:A:G	6:33222194	6	33222194	3.155e-28	4	6:33222194;rs28795133;rs12526020;rs141400340
1*	175	2	6:33270050:A:G	rs140814057	6	33270050	1.299e-41	2	rs140814057;rs140671946
1*	176	2	6:33306235:C:T	rs9277988	6	33306235	1.684e-41	5	rs9277988;rs116199362;rs117184686;rs460568;rs140293654
1*	177	2	6:33321530:A:G	rs139269700	6	33321530	3.051e-23	3	rs139269700;rs9348919;rs75359196
1*	178	2	6:33325355:A:G	rs551528195	6	33325355	1.61e-26	1	rs551528195
1*	179	2	6:33461784:A:G	rs34838160	6	33461784	2.551e-87	10	rs34838160;rs9461875;rs386906;rs188340;rs210216;rs460568;rs15604;rs9278004;rs1705003;rs576432906
1*	180	2	6:33495753:G:T	rs151272307	6	33495753	2.247e-10	3	rs151272307;rs188340;rs210216
1*	181	2	6:33515520:A:G	rs210152	6	33515520	2.821e-59	4	rs210152;rs138612476;rs6457734;rs72880049
1*	182	2	6:33545058:C:T	rs5745588	6	33545058	3.853e-10	1	rs5745588
1*	183	2	6:33561687:A:G	rs210164	6	33561687	2.181e-164	4	rs210164;rs6457734;rs9469532;rs72880049
1*	184	2	6:33575690:C:T	rs114770469	6	33575690	2.039e-58	3	rs114770469;rs9469532;rs138612476
1*	185	2	6:33581150:C:T	rs138965061	6	33581150	1.217e-41	4	rs138965061;rs1830873;rs2296333;rs942639
1*	186	2	6:33583732:A:G	rs13203795	6	33583732	7.123e-93	8	rs13203795;rs1830873;rs3763254;rs9461875;rs79034965;rs386906;rs188340;rs210216
1*	187	2	6:33584639:A:G	rs6924010	6	33584639	1.648e-61	4	rs6924010;rs75359196;rs9469552;rs9348919
1*	188	2	6:33589032:C:G	rs6910386	6	33589032	1.084e-233	2	rs6910386;rs138612476
1*	189	2	6:33590034:C:T	rs149629897	6	33590034	5.38e-19	2	rs149629897;rs140678643
1*	190	2	6:33605341:A:G	rs139811108	6	33605341	1.359e-23	5	rs139811108;rs117296630;rs74622024;rs116199362;rs117184686
1*	191	2	6:33632073:C:T	rs144156751	6	33632073	3.758e-27	1	rs144156751
1*	192	2	6:33638657:A:G	rs2274198	6	33638657	1.079e-211	4	rs2274198;rs942639;rs9469552;rs9469532
1*	193	2	6:33734793:A:G	rs943469	6	33734793	2.161e-81	5	rs943469;rs78531919;rs117296630;rs6941414;rs74622024
1*	194	2	6:33742164:C:G	rs576489922	6	33742164	1.782e-09	1	rs576489922
1*	195	2	6:33767235:A:G	6:33767235	6	33767235	5.804e-11	3	6:33767235;rs117482921;rs73744711
1*	196	2	6:33789202:C:T	rs73747323	6	33789202	6.941e-15	3	rs73747323;rs192895987;rs6941414
1*	197	2	6:33803237:A:G	rs186920560	6	33803237	4.134e-13	2	rs186920560;rs145847433
1*	198	2	6:33815924:A:G	rs2209345	6	33815924	8.555e-66	2	rs2209345;rs112733238
1*	199	2	6:33818001:A:G	rs4711356	6	33818001	2.521e-39	3	rs4711356;rs145847433;rs78531919
1*	200	2	6:33831063:C:T	rs116942502	6	33831063	4.242e-19	3	rs116942502;rs2296333;rs146888464
1*	201	2	6:33833525:C:G	rs192035216	6	33833525	8.477e-18	1	rs192035216
1*	202	2	6:33838727:C:T	rs62397636	6	33838727	4.742e-142	2	rs62397636;rs183661661
1*	203	2	6:33839635:G:T	rs9366831	6	33839635	4.621e-18	1	rs9366831
1*	204	2	6:33862855:C:G	rs3823428	6	33862855	5.178e-41	1	rs3823428
1*	205	2	6:33864998:A:G	rs3800341	6	33864998	3.275e-168	2	rs3800341;rs4713719
1*	206	2	6:33872149:A:G	rs6457748	6	33872149	1.88e-231	2	rs6457748;rs4711366
1*	207	2	6:33881804:C:T	rs79756150	6	33881804	2.45e-23	3	rs79756150;rs4713719;rs4711366
1*	208	2	6:33882710:C:T	rs144201162	6	33882710	1.176e-09	1	rs144201162
1*	209	2	6:33889404:A:G	rs2499761	6	33889404	6.349e-87	5	rs2499761;rs9368784;rs1324578;rs9296102;rs9394179
1*	210	2	6:33901255:C:T	rs2477239	6	33901255	4.402e-61	6	rs2477239;rs9394179;rs4713719;rs4711366;rs9368784;rs1324578
1*	211	2	6:33902653:C:T	rs6457749	6	33902653	4.298e-271	2	rs6457749;rs6939337
1*	212	2	6:33904869:A:T	rs12204020	6	33904869	4.178e-36	2	rs12204020;rs11965877
1*	213	2	6:33916313:A:C	rs2499743	6	33916313	9.54e-65	4	rs2499743;rs2499749;rs62399336;rs557986594
1*	214	2	6:33921175:A:G	rs9469649	6	33921175	1.874e-30	2	rs9469649;rs6939337
1*	215	2	6:33930488:A:G	rs117270274	6	33930488	4.912e-09	1	rs117270274
1*	216	2	6:33952531:A:G	rs140007014	6	33952531	8.916e-278	2	rs140007014;rs145371853
1*	217	2	6:33953646:C:T	rs2499766	6	33953646	1.101e-279	4	rs2499766;rs2495986;rs4256433;rs2499749
1*	218	2	6:33972174:C:T	rs2495996	6	33972174	3.354e-116	6	rs2495996;rs79266576;rs2451361;rs9469702;rs7763695;rs2495994
1*	219	2	6:33990978:C:T	rs3778041	6	33990978	2.249e-10	1	rs3778041
1*	220	2	6:34008006:A:G	rs2229900	6	34008006	1.696e-93	5	rs2229900;rs2451361;rs9469702;rs9368792;rs2495999
1*	221	2	6:34040401:A:G	rs200824858	6	34040401	7.026e-38	3	rs200824858;rs34191868;rs9469702
1*	222	2	6:34055485:A:C	rs11968206	6	34055485	1.36e-11	1	rs11968206
1*	223	2	6:34091702:C:T	rs6913755	6	34091702	3.267e-48	3	rs6913755;rs75432840;rs7763695
1*	224	2	6:34102680:A:C	rs3756925	6	34102680	4.525e-17	2	rs3756925;rs146900754
1*	225	2	6:34113984:C:G	rs117885712	6	34113984	1.714e-10	2	rs117885712;rs4711383
1*	226	2	6:34116700:G:T	rs182291280	6	34116700	1.498e-234	4	rs182291280;rs145223175;rs149743744;rs568421342
1*	227	2	6:34214322:C:G	rs1150781	6	34214322	9.277e-120	5	rs1150781;rs77451337;rs75432840;rs4711383;rs1759639
1*	228	2	6:34351767:A:G	rs3778077	6	34351767	1.082e-81	1	rs3778077
1*	229	2	6:34432883:C:T	rs62398681	6	34432883	1.347e-216	5	rs62398681;rs9296115;rs6940215;rs201495468;rs820077
1*	230	2	6:34460416:C:T	rs7454888	6	34460416	6.468e-33	3	rs7454888;rs71567453;rs3846867
1*	231	2	6:34491013:A:G	rs73746675	6	34491013	1.176e-43	4	rs73746675;rs3798543;rs9791348;rs3846867
1*	232	2	6:34519547:C:G	rs3778070	6	34519547	5.809e-43	4	rs3778070;rs3798543;rs6940215;rs71567453
1*	233	2	6:34545999:A:C	rs205270	6	34545999	4.876e-10	5	rs205270;rs9791348;rs112706550;rs71567453;rs3798543
1*	234	2	6:34669729:A:G	rs12208743	6	34669729	5.498e-09	2	rs12208743;rs2091074
1*	235	2	6:34684227:C:T	rs117833645	6	34684227	1.04e-10	3	rs117833645;rs74469408;rs80201972
1*	236	2	6:34808537:C:T	rs11758962	6	34808537	4.935e-166	7	rs11758962;rs2092428;rs6930756;rs2762346;rs732594;rs10484578;rs2814980
1*	237	2	6:34947804:A:G	rs148914899	6	34947804	2.084e-156	5	rs148914899;rs149743744;rs188106794;rs558815327;rs149712527
1*	238	2	6:35107682:A:T	rs3777748	6	35107682	2.726e-58	8	rs3777748;rs112706550;rs3777744;rs2814980;rs2092428;rs820077;rs6930756;rs2762346
1*	239	2	6:35160008:A:G	rs3800397	6	35160008	3.003e-188	3	rs3800397;rs138807262;rs145371853
1*	240	2	6:35173757:A:G	rs3734252	6	35173757	6.57e-20	8	rs3734252;rs74292915;rs146032538;rs4713912;rs7751693;rs144791221;rs559658642;rs199931645
1*	241	2	6:35198438:C:T	rs117462486	6	35198438	1.133e-16	1	rs117462486
1*	242	2	6:35209353:C:T	rs3800381	6	35209353	9.446e-11	1	rs3800381
1*	243	2	6:35326326:C:T	rs187472977	6	35326326	1.008e-12	1	rs187472977
1*	244	2	6:35354116:C:T	rs7763692	6	35354116	1.025e-13	1	rs7763692
1*	245	2	6:35404354:C:T	rs2206030	6	35404354	7.273e-28	7	rs2206030;rs11755391;rs6930756;rs2762346;rs732594;rs10484578;rs112706550
1*	246	2	6:35449326:C:T	rs9394299	6	35449326	3.24e-52	7	rs9394299;rs74469408;rs80201972;rs10484578;rs3777744;rs9470027;rs74292915
1*	247	2	6:35450139:A:C	rs57488933	6	35450139	1.2e-12	1	rs57488933
1*	248	2	6:35465786:A:C	rs1051952	6	35465786	8.186e-92	7	rs1051952;rs7738710;rs12181820;rs9368873;rs4713902;rs10484578;rs11755391
1*	249	2	6:35491959:C:T	rs59317948	6	35491959	2.444e-08	1	rs59317948
1*	250	2	6:35510122:C:T	rs11751447	6	35510122	1.437e-42	3	rs11751447;rs4713902;rs2766542
1*	251	2	6:35526262:C:T	rs80105605	6	35526262	7.311e-70	4	rs80105605;rs558815327;rs149743744;rs188106794
1*	252	2	6:35562640:A:G	rs3798346	6	35562640	4.169e-08	1	rs3798346
1*	253	2	6:35702887:A:G	rs2817038	6	35702887	1.301e-36	4	rs2817038;rs2766542;rs7738710;rs12181820
1*	254	2	6:35707354:C:T	rs11968757	6	35707354	7.524e-10	2	rs11968757;rs2766542
1*	255	2	6:35708953:A:G	rs6936778	6	35708953	1.902e-10	1	rs6936778
1*	256	2	6:35725168:A:G	rs115651488	6	35725168	4.495e-13	2	rs115651488;rs144791221
1*	257	2	6:35727590:C:T	rs4713923	6	35727590	1.239e-18	3	rs4713923;rs12153849;rs4713902
1*	258	2	6:35739341:A:G	rs1343796	6	35739341	1.869e-99	1	rs1343796
1*	259	2	6:35756082:C:G	rs9462110	6	35756082	1.289e-12	1	rs9462110
1*	260	2	6:35782878:C:T	rs150508695	6	35782878	2.238e-08	1	rs150508695
1*	261	2	6:35833838:A:G	rs144372631	6	35833838	1.382e-09	3	rs144372631;rs12527957;rs58632953
1*	262	2	6:35955833:A:G	rs10755688	6	35955833	5.937e-73	6	rs10755688;rs1100864;rs2071863;rs72657688;rs2766527;rs12153849
1*	263	2	6:36070227:G:T	rs16884857	6	36070227	1.22e-12	3	rs16884857;rs1100864;rs58632953
1*	264	2	6:36085325:A:G	rs7757672	6	36085325	1.273e-08	2	rs7757672;rs12201042
1*	265	2	6:36144958:C:T	rs9394333	6	36144958	5.875e-41	4	rs9394333;rs72657688;rs58632953;rs12201042
1*	266	2	6:36254854:C:T	rs6457895	6	36254854	9.292e-09	1	rs6457895
1*	267	2	6:36267519:C:T	rs11754972	6	36267519	6.94e-43	2	rs11754972;rs34927038
1*	268	2	6:36289145:A:C	rs763018	6	36289145	9.046e-33	1	rs763018
1*	269	2	6:36340130:G:T	rs73406999	6	36340130	2.511e-16	3	rs73406999;rs2269563;rs744848
1*	270	2	6:36341165:A:G	rs3213529	6	36341165	6.968e-14	3	rs3213529;rs11965340;rs4713959
1*	271	2	6:36342181:C:T	rs6457907	6	36342181	1.006e-101	3	rs6457907;rs4713959;rs744848
1*	272	2	6:36393586:A:T	rs200827677	6	36393586	2.683e-41	3	rs200827677;rs9380582;rs6923337
1*	273	2	6:36434182:A:G	rs541787992	6	36434182	2.148e-91	5	rs541787992;rs12215712;rs236414;rs111469215;rs138807262
1*	274	2	6:36563991:C:T	rs143990994	6	36563991	1.658e-266	7	rs143990994;rs236492;rs58471412;rs111469215;rs9380645;rs139822447;rs9470228
1*	275	2	6:36653597:C:T	rs1059234	6	36653597	2.379e-14	3	rs1059234;rs236486;rs10947616
1*	276	2	6:36707501:A:G	rs6904294	6	36707501	5.114e-19	3	rs6904294;rs236426;rs236486
1*	277	2	6:36714491:A:G	rs929051	6	36714491	1.58e-16	4	rs929051;rs58471412;rs144332307;rs2395655
1*	278	2	6:36747889:C:T	rs236416	6	36747889	1.644e-38	4	rs236416;rs236486;rs4236052;rs236426
1*	279	2	6:36757183:A:G	rs16889143	6	36757183	3.803e-09	3	rs16889143;rs9349011;rs4236052
1*	280	2	6:36759976:A:C	rs3213538	6	36759976	3.058e-47	4	rs3213538;rs58471412;rs9380602;rs9349011
1*	281	2	6:36766292:C:T	rs6940728	6	36766292	5.192e-19	1	rs6940728
1*	282	2	6:36807161:C:T	rs183702303	6	36807161	5.564e-09	1	rs183702303
1*	283	2	6:36866059:C:T	rs517878	6	36866059	7.97e-22	3	rs517878;rs236377;rs374360645
1*	284	2	6:36908382:A:G	rs697749	6	36908382	3.354e-17	1	rs697749
1*	285	2	6:36919148:C:T	rs4714027	6	36919148	3.031e-60	2	rs4714027;rs1063021
1*	286	2	6:36924516:C:T	rs10947652	6	36924516	8.37e-139	5	rs10947652;rs111469215;rs73411578;rs139822447;rs2797779
1*	287	2	6:36960738:G:T	rs4714030	6	36960738	2.603e-26	2	rs4714030;rs3778027
1*	288	2	6:36988364:C:T	rs831504	6	36988364	2.848e-14	2	rs831504;rs9470463
1*	289	2	6:36996773:C:G	rs708017	6	36996773	5.331e-75	4	rs708017;rs9470463;rs73411578;rs9296213
1*	290	2	6:37061182:C:T	rs9366929	6	37061182	6.96e-17	4	rs9366929;rs9296213;rs9368984;rs73411578
1*	291	2	6:37113546:A:G	rs2788078	6	37113546	1.703e-107	2	rs2788078;rs10947660
1*	292	2	6:37129932:A:C	rs262909	6	37129932	4.444e-13	1	rs262909
1*	293	2	6:37500067:A:G	rs2246439	6	37500067	5.88e-10	3	rs2246439;rs2797777;rs2254710
1*	294	2	6:37526918:A:G	rs7739470	6	37526918	1.09e-08	3	rs7739470;rs9369009;rs2797777
1*	295	2	6:37557978:A:G	rs1776441	6	37557978	2.706e-16	3	rs1776441;rs2797777;rs9369009
1*	296	2	6:37722549:G:T	rs6922267	6	37722549	6.098e-09	1	rs6922267
1*	297	2	6:37761564:G:T	rs9369022	6	37761564	4.926e-08	1	rs9369022
1*	298	2	6:38166544:A:C	rs79699826	6	38166544	1.275e-64	8	rs79699826;rs9369042;rs4626419;rs4714164;rs2797779;rs73734242;rs72850893;rs11757371
1*	299	2	6:38343726:A:G	rs9366958	6	38343726	7.488e-12	3	rs9366958;rs4714164;rs228183
1*	300	2	6:38991516:C:G	rs761385	6	38991516	1.772e-12	1	rs761385
1*	301	2	6:39183470:C:T	rs10456100	6	39183470	7.211e-09	1	rs10456100
1*	302	2	6:39257716:A:G	rs2758901	6	39257716	2.104e-09	1	rs2758901
1*	303	2	6:39342344:C:T	rs72860035	6	39342344	2.897e-31	3	rs72860035;rs6458131;rs4714239
1*	304	3	6:57063946:A:G	rs12195875	6	57063946	2.921e-09	1	rs12195875
1*	305	3	6:57064058:C:G	rs9367715	6	57064058	3.225e-09	2	rs9367715;rs1562908
1*	306	3	6:57106703:C:T	rs148108129	6	57106703	6.599e-20	6	rs148108129;rs7738699;rs117602279;rs146941321;rs141007158;rs144804328
1*	307	4	6:62948594:C:T	rs176614	6	62948594	1.213e-08	2	rs176614;rs9294075
1*	308	4	6:63375364:C:T	rs9360679	6	63375364	5.043e-11	1	rs9360679
1*	309	4	6:63391206:C:T	rs6453681	6	63391206	1.207e-49	7	rs6453681;rs9294075;rs151291837;rs139753688;rs75465119;rs79865883;rs62419097
1*	310	4	6:64833437:C:T	rs79415685	6	64833437	4.178e-25	7	rs79415685;rs77102820;rs144867071;rs12215142;rs145239116;rs151291837;rs118070556
1*	311	5	11:45730520:A:C	rs192387104	11	45730520	2.731e-33	2	rs192387104;rs77817195
1*	312	6	11:46315265:C:T	rs147894496	11	46315265	1.454e-08	1	rs147894496
1*	313	6	11:46394844:G:T	rs146364498	11	46394844	1.411e-22	2	rs146364498;rs74333972
1*	314	6	11:47462176:A:G	rs78559029	11	47462176	2.846e-70	3	rs78559029;rs75874665;rs375314312
1*	315	6	11:47589106:A:C	rs118011483	11	47589106	5.205e-35	3	rs118011483;rs1228008;rs7130402
1*	316	6	11:48234924:A:G	rs7927965	11	48234924	1.758e-19	3	rs7927965;rs4929891;rs7945911
1*	317	6	11:48346996:A:G	rs12794960	11	48346996	4.233e-300	4	rs12794960;rs11604358;rs75874665;rs7130402
1*	318	6	11:49255389:C:T	rs4103567	11	49255389	4.886e-26	2	rs4103567;rs4929891
1*	319	6	11:49373782:G:T	rs12797853	11	49373782	6.667e-304	4	rs12797853;rs10901912;rs11604358;rs4929891
1*	320	6	11:50473174:C:T	rs1522925	11	50473174	7.357e-16	3	rs1522925;rs76209387;rs1602115
1*	321	6	11:51532821:C:T	rs10902371	11	51532821	1.661e-20	2	rs10902371;rs76209387
1*	322	7	11:55183346:G:T	rs1216213	11	55183346	6.619e-22	3	rs1216213;rs28681529;rs11228263
1*	323	7	11:55431496:C:T	rs11230593	11	55431496	2.762e-28	6	rs11230593;rs10897182;rs28681529;rs57377676;rs11228263;rs4479008
1*	324	7	11:56306773:A:C	rs9651721	11	56306773	2.124e-294	11	rs9651721;rs4479008;rs1943637;rs1938746;rs17640952;rs118113160;rs3017313;rs75419177;rs10897182;rs28681529;rs57377676
1*	325	7	11:56492866:A:T	rs61902472	11	56492866	3.285e-26	9	rs61902472;rs1943637;rs61902518;rs528894;rs1783443;rs28681529;rs57377676;rs11228263;rs4479008
1*	326	7	11:56573675:A:G	rs141394107	11	56573675	1.056e-117	3	rs141394107;rs118113160;rs74576214
1*	327	7	11:56670053:A:C	rs1783464	11	56670053	5.04e-12	2	rs1783464;rs1783443
1*	328	7	11:56788423:A:G	rs138238752	11	56788423	8.114e-63	1	rs138238752
1*	329	7	11:56835480:A:G	rs7925718	11	56835480	3.765e-12	1	rs7925718
1*	330	7	11:57045815:A:C	rs7931298	11	57045815	1.524e-16	3	rs7931298;rs75419177;rs57944700
1*	331	7	11:57126970:C:T	rs142488978	11	57126970	3.179e-18	3	rs142488978;rs554171904;11:57966721
1*	332	7	11:57661969:A:G	rs144755777	11	57661969	2.626e-24	5	rs144755777;rs151272344;rs79259591;rs118113160;rs74576214
1*	333	7	11:57809586:A:C	rs4938884	11	57809586	3.359e-12	2	rs4938884;rs554171904
2	1	1	6:21038922:G:T	rs201313	6	21038922	3.085e-08	2	rs201313;rs149144618
2	2	1	6:21891373:A:G	rs11759616	6	21891373	3.675e-23	6	rs11759616;rs7760082;rs11751260;rs1857118;rs149144618;rs72826303
2	3	1	6:21944707:C:T	rs6906731	6	21944707	3.653e-16	1	rs6906731
2	4	1	6:22033010:A:G	rs9350410	6	22033010	8.311e-14	1	rs9350410
2	5	1	6:22035582:C:G	rs17261487	6	22035582	8.959e-31	5	rs17261487;rs149144618;rs72826303;rs7760082;rs11751260
2	6	1	6:22086292:A:G	rs6901423	6	22086292	4.498e-09	1	rs6901423
2	7	1	6:22351005:A:C	rs2655446	6	22351005	1.842e-21	1	rs2655446
2	8	1	6:22486974:C:T	rs6920470	6	22486974	1.635e-25	2	rs6920470;rs9358547
2	9	1	6:22516794:A:G	rs1418313	6	22516794	1.616e-11	2	rs1418313;rs6456486
2	10	1	6:22711757:A:T	rs9358581	6	22711757	2.45e-21	1	rs9358581
2	11	1	6:22947374:C:T	rs7762064	6	22947374	5.54e-15	1	rs7762064
2	12	1	6:23122997:C:T	rs6456523	6	23122997	2.615e-30	2	rs6456523;rs4571550
2	13	1	6:23197535:C:G	rs71535558	6	23197535	3.619e-09	1	rs71535558
2	14	1	6:23229513:C:G	rs9466682	6	23229513	1.449e-16	1	rs9466682
2	15	1	6:23241970:G:T	rs78702151	6	23241970	2.194e-116	5	rs78702151;rs2744132;rs1857118;rs36029180;rs116631002
2	16	1	6:23253861:C:T	rs9466697	6	23253861	4.876e-13	1	rs9466697
2	17	1	6:23323761:C:T	rs185189105	6	23323761	1.172e-21	2	rs185189105;rs142049635
2	18	1	6:23378951:G:T	rs1925458	6	23378951	4.348e-08	1	rs1925458
2	19	1	6:23404276:C:T	rs7775425	6	23404276	4.726e-34	2	rs7775425;rs9379512
2	20	1	6:23437254:A:T	rs7753164	6	23437254	1.116e-10	1	rs7753164
2	21	1	6:23446947:C:T	rs6456551	6	23446947	6.929e-192	3	rs6456551;rs197963;rs116631002
2	22	1	6:23490749:C:G	rs9460883	6	23490749	4.111e-39	2	rs9460883;rs9356865
2	23	1	6:23521465:C:T	rs199099	6	23521465	7.153e-13	2	rs199099;rs7749787
2	24	1	6:23526341:A:G	rs12189677	6	23526341	1.1e-85	3	rs12189677;rs197963;rs719437
2	25	1	6:23593375:A:G	rs197988	6	23593375	7.711e-09	1	rs197988
2	26	1	6:23607589:A:G	rs7768236	6	23607589	1.004e-10	1	rs7768236
2	27	1	6:23649645:A:G	rs1321913	6	23649645	1.588e-10	1	rs1321913
2	28	1	6:23657168:C:T	rs550050	6	23657168	4.715e-19	1	rs550050
2	29	1	6:23667206:C:T	rs9379536	6	23667206	8.413e-11	4	rs9379536;rs12191169;rs2328791;rs9393460
2	30	1	6:23683509:C:G	rs526263	6	23683509	2.731e-43	3	rs526263;rs12191169;rs9393460
2	31	1	6:23709107:A:G	rs2038827	6	23709107	1.836e-26	3	rs2038827;rs9393460;rs2203083
2	32	1	6:23757251:C:T	rs115884942	6	23757251	4.716e-20	3	rs115884942;rs181090985;rs11967333
2	33	1	6:23805281:A:G	rs9348608	6	23805281	2.696e-09	3	rs9348608;rs2203083;rs2328791
2	34	1	6:23909811:A:C	rs481314	6	23909811	3.778e-17	1	rs481314
2	35	1	6:23942549:C:T	rs113004122	6	23942549	2.996e-20	1	rs113004122
2	36	1	6:23964851:A:G	rs707876	6	23964851	1.118e-40	2	rs707876;rs9295612
2	37	1	6:24026095:A:G	rs9356920	6	24026095	5.734e-15	1	rs9356920
2	38	1	6:24035042:C:G	rs9358742	6	24035042	5.063e-23	2	rs9358742;rs1402406
2	39	1	6:24070585:A:G	rs1343622	6	24070585	9.355e-09	1	rs1343622
2	40	1	6:24147572:A:G	rs3178	6	24147572	6.241e-135	3	rs3178;rs1622103;rs3846829
2	41	1	6:24163814:A:G	rs61528653	6	24163814	4.176e-55	2	rs61528653;rs12662101
2	42	1	6:24169966:A:C	rs148847524	6	24169966	5.8e-10	3	rs148847524;rs143231436;rs12196541
2	43	1	6:24250945:C:T	rs78120860	6	24250945	4.31e-166	4	rs78120860;rs150895593;rs117518521;rs142049635
2	44	1	6:24463497:A:G	rs2793444	6	24463497	1.637e-39	5	rs2793444;rs760904;rs807531;rs6942189;rs6456614
2	45	1	6:24464907:A:G	rs9467176	6	24464907	5.483e-166	4	rs9467176;rs760904;rs793676;rs7754778
2	46	1	6:24502123:A:G	rs9467203	6	24502123	5.867e-89	2	rs9467203;rs807541
2	47	1	6:24585547:A:G	rs2760135	6	24585547	6.979e-44	4	rs2760135;rs3181238;rs7765052;rs807531
2	48	1	6:24611493:A:G	rs7771169	6	24611493	3.739e-42	5	rs7771169;rs139126471;rs148672910;rs138191414;rs6902039
2	49	1	6:24618761:A:G	rs56895808	6	24618761	8.51e-64	1	rs56895808
2	50	1	6:24650761:A:G	rs3087943	6	24650761	1.964e-08	1	rs3087943
2	51	1	6:24734952:A:G	rs148523288	6	24734952	1.707e-08	1	rs148523288
2	52	1	6:24764788:A:G	rs1980643	6	24764788	3.111e-44	1	rs1980643
2	53	1	6:24771431:A:C	rs2493333	6	24771431	9.273e-143	2	rs2493333;rs2754772
2	54	1	6:24795680:C:T	rs6910956	6	24795680	2.359e-09	3	rs6910956;rs3813680;rs2754772
2	55	1	6:24844443:C:T	rs10946731	6	24844443	2.761e-08	1	rs10946731
2	56	1	6:24851787:C:T	rs9393592	6	24851787	2.088e-71	4	rs9393592;rs2754772;rs61528548;rs3813680
2	57	1	6:24902113:A:G	rs2817726	6	24902113	3.921e-51	2	rs2817726;rs4431425
2	58	1	6:24928081:A:G	rs55927112	6	24928081	3.801e-17	2	rs55927112;rs138711481
2	59	1	6:24942042:A:G	rs13202601	6	24942042	5.306e-13	1	rs13202601
2	60	1	6:24951199:A:G	rs647297	6	24951199	4.487e-20	1	rs647297
2	61	1	6:24951809:A:G	rs387628	6	24951809	2.172e-65	1	rs387628
2	62	1	6:24970187:A:C	rs402518	6	24970187	2.921e-168	3	rs402518;rs117518521;rs150895593
2	63	1	6:25028200:A:C	rs9356958	6	25028200	7.09e-18	2	rs9356958;rs9348651
2	64	1	6:25034005:A:G	rs74378127	6	25034005	1.634e-08	1	rs74378127
2	65	1	6:25122737:A:G	rs302971	6	25122737	1.265e-66	3	rs302971;rs59401719;rs117510375
2	66	1	6:25141224:C:T	rs3749873	6	25141224	1.2e-28	2	rs3749873;6:25003339
2	67	1	6:25170501:A:G	rs12529629	6	25170501	4.275e-96	3	rs12529629;rs9356960;rs12198209
2	68	1	6:25172641:G:T	rs9467434	6	25172641	1.171e-121	2	rs9467434;rs5008131
2	69	1	6:25180079:C:T	rs141544289	6	25180079	3.085e-11	1	rs141544289
2	70	1	6:25185989:G:T	rs9467438	6	25185989	5e-222	4	rs9467438;rs9356969;rs9379740;rs5008131
2	71	1	6:25245873:A:G	rs80272928	6	25245873	2.248e-30	5	rs80272928;rs78612998;rs138711481;rs2744563;6:25003339
2	72	1	6:25283500:A:G	rs9358849	6	25283500	1.802e-49	9	rs9358849;rs78904078;rs2690123;rs2690112;rs11754685;rs4712922;rs5008131;rs9356969;rs9379740
2	73	1	6:25292401:C:T	rs10456320	6	25292401	1.659e-09	2	rs10456320;rs6936496
2	74	1	6:25347646:G:T	rs6456671	6	25347646	7.134e-16	3	rs6456671;rs1927695;rs78904078
2	75	1	6:25379926:C:T	rs4711082	6	25379926	3.46e-278	6	rs4711082;rs4712929;rs2690123;rs2744306;rs2690098;rs4712922
2	76	1	6:25409459:A:G	rs73387233	6	25409459	1.145e-109	3	rs73387233;rs927986;rs2744233
2	77	1	6:25410162:A:G	rs77551782	6	25410162	3.153e-52	3	rs77551782;rs927986;rs1927695
2	78	1	6:25411187:C:T	rs146458991	6	25411187	2.794e-34	2	rs146458991;rs72830743
2	79	1	6:25414846:A:G	rs1927693	6	25414846	2.647e-196	4	rs1927693;rs7761140;rs9366624;rs62392388
2	80	1	6:25415845:A:G	rs11752825	6	25415845	2.574e-84	4	rs11752825;rs7761140;rs9366624;rs62392388
2	81	1	6:25424256:A:G	rs12213948	6	25424256	2.649e-65	3	rs12213948;rs9366624;rs62392388
2	82	1	6:25435552:A:G	rs76448003	6	25435552	1.825e-22	2	rs76448003;rs62392388
2	83	1	6:25444966:A:G	rs76417859	6	25444966	1.036e-11	2	rs76417859;rs72831251
2	84	1	6:25473413:A:G	rs384340	6	25473413	1.34e-278	2	rs384340;rs301394
2	85	1	6:25499976:A:G	rs16890663	6	25499976	2.951e-11	3	rs16890663;rs12207674;rs932316
2	86	1	6:25504336:A:G	rs148025681	6	25504336	2.537e-287	3	rs148025681;rs150895593;rs117518521
2	87	1	6:25517923:C:G	rs301374	6	25517923	1.082e-11	3	rs301374;rs214066;rs374087
2	88	1	6:25622233:A:G	rs941428	6	25622233	1.165e-283	6	rs941428;rs932316;rs7754944;rs301394;rs374087;rs12207674
2	89	1	6:25664981:A:T	rs9393654	6	25664981	7.616e-09	2	rs9393654;rs214066
2	90	1	6:25718219:C:T	rs79484327	6	25718219	1.768e-121	5	rs79484327;rs9467788;rs139126471;rs148672910;rs139581790
2	91	1	6:25750896:A:G	rs191929921	6	25750896	4.493e-31	2	rs191929921;rs79008907
2	92	1	6:25752628:A:G	rs116956053	6	25752628	3.737e-25	2	rs116956053;rs9358870
2	93	1	6:25823774:A:G	rs12211184	6	25823774	1.118e-31	9	rs12211184;rs4573076;rs12210098;rs72834629;rs9467676;rs9379831;rs9358870;rs7754944;rs117462666
2	94	1	6:25950382:G:T	rs7740793	6	25950382	1.748e-199	5	rs7740793;rs12210098;rs9467676;rs7754944;rs4573076
2	95	1	6:25960799:C:T	rs117965842	6	25960799	2.137e-10	1	rs117965842
2	96	1	6:26107463:A:G	rs198846	6	26107463	1.648e-31	4	rs198846;rs6456691;rs72832571;rs12210098
2	97	1	6:26150809:C:G	rs75546109	6	26150809	2.574e-56	4	rs75546109;rs9379831;rs806794;rs77704135
2	98	1	6:26151535:G:T	rs9358908	6	26151535	2.684e-211	9	rs9358908;rs9379831;rs4145878;rs806794;rs7754944;rs117462666;rs4573076;rs72834629;rs9467676
2	99	1	6:26205770:A:C	rs9393687	6	26205770	1.117e-23	2	rs9393687;rs140007781
2	100	1	6:26340872:A:G	rs55964643	6	26340872	3.854e-19	3	rs55964643;rs1796519;rs806794
2	101	1	6:26398664:A:G	rs12201802	6	26398664	2.405e-25	6	rs12201802;rs1796521;rs2130655;rs187242505;rs4434463;rs148071656
2	102	1	6:26510605:C:T	rs1056668	6	26510605	1.129e-301	9	rs1056668;rs2130655;rs12194399;rs187242505;rs1156086;rs2092114;rs9348762;rs10946812;rs1796521
2	103	1	6:26574648:C:T	rs117043828	6	26574648	5.055e-09	2	rs117043828;rs1796519
2	104	1	6:26642117:A:G	6:26642117	6	26642117	1.263e-09	3	6:26642117;rs140007781;rs141454221
2	105	1	6:26681071:C:T	rs142076412	6	26681071	3.418e-08	1	rs142076412
2	106	1	6:26880157:C:T	rs3999347	6	26880157	9.154e-171	2	rs3999347;rs12194399
2	107	1	6:26976288:C:T	rs2008668	6	26976288	1.068e-151	3	rs2008668;rs140366348;rs9467788
2	108	1	6:27115467:A:G	rs17737028	6	27115467	1.23e-81	4	rs17737028;rs72845876;rs12192568;rs77704135
2	109	1	6:27152022:A:G	rs189622978	6	27152022	1.762e-09	1	rs189622978
2	110	1	6:27187925:A:T	rs566962549	6	27187925	3.358e-17	5	rs566962549;rs2092114;rs9348762;rs12194399;rs1156086
2	111	1	6:27230288:C:G	rs9379966	6	27230288	2.243e-273	1	rs9379966
2	112	1	6:27308005:A:G	rs149260225	6	27308005	1.565e-40	2	rs149260225;rs12174489
2	113	1	6:27470810:C:G	rs74328437	6	27470810	1.202e-43	8	rs74328437;rs117453392;rs142970147;rs9368537;rs4434463;rs1156086;rs2092114;rs9368503
2	114	1	6:27796466:A:T	rs58117324	6	27796466	4.25e-261	6	rs58117324;rs9368537;rs7739987;rs2092114;rs142970147;rs140366348
2	115	1	6:27817776:A:G	rs144209406	6	27817776	1.46e-10	2	rs144209406;rs148900334
2	116	1	6:27982501:A:C	6:27982501	6	27982501	2.418e-08	2	6:27982501;6:28325571
2	117	1	6:27989921:A:G	rs9468267	6	27989921	6.476e-255	8	rs9468267;rs169431;rs7739987;rs1150691;rs12000;rs392230;rs876737;rs9368503
2	118	1	6:28003222:C:T	rs184084677	6	28003222	2.512e-37	6	rs184084677;rs169431;rs141442317;rs2235359;rs74967533;rs149878
2	119	1	6:28036788:A:C	rs573149595	6	28036788	6.65e-09	4	rs573149595;rs141442317;rs141712291;rs141661096
2	120	1	6:28197752:C:G	rs34024998	6	28197752	1.392e-297	8	rs34024998;rs2235359;rs74967533;rs213232;rs1884936;rs9283885;rs149878;rs169431
2	121	1	6:28214698:C:T	rs17720293	6	28214698	1.157e-90	4	rs17720293;rs143144207;rs72845876;rs12192568
2	122	1	6:28225296:A:G	rs149204020	6	28225296	6.642e-22	4	rs149204020;6:28325571;rs148208741;6:28713434
2	123	1	6:28278112:A:C	rs113710928	6	28278112	9.639e-10	4	rs113710928;rs148900334;rs139614182;rs142445164
2	124	1	6:28464927:A:T	rs183719819	6	28464927	9.911e-29	2	rs183719819;rs1884936
2	125	1	6:28500911:A:C	rs571726149	6	28500911	1.97e-20	2	rs571726149;6:28325571
2	126	1	6:28636927:A:G	rs79327542	6	28636927	2.22e-26	6	rs79327542;rs12055619;rs7349908;rs150971595;rs213232;rs34077080
2	127	1	6:28647722:C:T	rs117585327	6	28647722	8.633e-22	3	rs117585327;rs117846312;rs148672491
2	128	1	6:28677498:A:G	rs139675877	6	28677498	7.856e-31	3	rs139675877;6:28713434;rs148208741
2	129	1	6:28686284:C:T	rs2394152	6	28686284	2.293e-306	12	rs2394152;rs1233595;rs876737;rs12055619;rs9283885;rs3828924;rs3117340;rs12000;rs213232;rs34077080;rs392230;rs6939576
2	130	1	6:28804189:C:T	rs117257140	6	28804189	5.541e-10	1	rs117257140
2	131	1	6:28919625:A:G	rs7745220	6	28919625	6.293e-52	8	rs7745220;rs9283885;rs77454196;rs1884936;rs139728037;rs1233595;rs876737;rs117847335
2	132	1	6:28940186:A:C	6:28940186	6	28940186	5.508e-53	2	6:28940186;6:29229480
2	133	1	6:28985428:A:G	rs190461360	6	28985428	3.916e-53	3	rs190461360;rs16894983;rs29263
2	134	1	6:29034882:A:C	rs4599679	6	29034882	1.331e-229	9	rs4599679;rs142242329;rs7349908;rs73740747;rs151327481;rs1233595;rs9257182;rs41316602;rs139791445
2	135	1	6:29269066:A:G	rs7754926	6	29269066	3.626e-40	10	rs7754926;rs1419639;rs151001546;rs9468541;rs117181567;rs139614182;rs139494877;rs41316618;rs9283885;rs3117340
2	136	1	6:29289929:C:T	rs146185592	6	29289929	1.812e-12	5	rs146185592;rs151001546;rs117181567;rs139614182;rs139494877
2	137	1	6:29335080:A:C	rs148472353	6	29335080	4.18e-09	2	rs148472353;rs138059097
2	138	1	6:29337075:G:T	rs3930883	6	29337075	6.639e-155	7	rs3930883;rs16894836;rs7349908;rs876737;rs9283885;rs3828924;rs3117340
2	139	1	6:29396874:C:T	rs3128851	6	29396874	5.663e-294	4	rs3128851;rs7349908;rs41317798;rs16894836
2	140	1	6:29427068:A:G	rs59818916	6	29427068	9.99e-18	5	rs59818916;rs148900334;rs41316602;rs142445164;rs142242329
2	141	1	6:29436911:C:T	rs116973845	6	29436911	2.493e-13	3	rs116973845;rs139728037;rs146609822
2	142	1	6:29441502:A:G	rs117137251	6	29441502	1.371e-09	3	rs117137251;rs141712291;rs141661096
2	143	1	6:29519173:C:T	rs17351888	6	29519173	3.001e-102	2	rs17351888;rs143144207
2	144	1	6:29530868:C:T	rs362529	6	29530868	4.204e-79	9	rs362529;rs117181567;rs29263;rs9461540;rs41316618;rs151001546;rs16894983;rs9468541;rs41317798
2	145	1	6:29538403:C:G	rs1003582	6	29538403	5.325e-115	1	rs1003582
2	146	1	6:29543646:G:T	rs362525	6	29543646	1.081e-231	8	rs362525;rs117181567;rs10946999;rs74294678;rs3095268;rs146663041;rs151001546;rs41317798
2	147	1	6:29602881:A:G	6:29602881	6	29602881	2.788e-08	1	6:29602881
2	148	1	6:29614627:C:G	rs7774576	6	29614627	6.619e-54	3	rs7774576;rs117680413;rs141025794
2	149	2	6:33197571:C:T	rs9277947	6	33197571	1.764e-87	6	rs9277947;rs184714444;rs67136908;rs538693715;rs210159;rs10807127
2	150	2	6:33222194:A:G	6:33222194	6	33222194	2.525e-14	4	6:33222194;rs28795133;rs12526020;rs141400340
2	151	2	6:33270050:A:G	rs140814057	6	33270050	1.589e-15	2	rs140814057;rs140671946
2	152	2	6:33306235:C:T	rs9277988	6	33306235	2.098e-10	4	rs9277988;rs116199362;rs117184686;rs460568
2	153	2	6:33321530:A:G	rs139269700	6	33321530	6.871e-10	2	rs139269700;rs75359196
2	154	2	6:33325355:A:G	rs551528195	6	33325355	5.879e-12	1	rs551528195
2	155	2	6:33388894:C:G	rs114993678	6	33388894	7.734e-80	6	rs114993678;rs34838160;rs138892259;rs386906;rs187984126;rs114972028
2	156	2	6:33443967:A:C	rs576432906	6	33443967	5.143e-10	4	rs576432906;rs34838160;rs9278004;rs1705003
2	157	2	6:33480435:A:G	rs86715	6	33480435	5.629e-165	16	rs86715;rs210159;rs138892259;rs386906;rs150273297;rs10807127;rs73408232;rs9461918;rs4713711;rs184714444;rs187984126;rs67136908;rs114972028;rs1705003;rs538693715;rs34838160
2	158	2	6:33509023:A:C	rs210199	6	33509023	2.371e-306	4	rs210199;rs9461875;rs407415;rs72880049
2	159	2	6:33571302:A:T	rs35020498	6	33571302	1.135e-103	4	rs35020498;rs10807127;rs72880049;rs210152
2	160	2	6:33575690:C:T	rs114770469	6	33575690	3.584e-25	4	rs114770469;rs407415;rs138892259;rs138612476
2	161	2	6:33581150:C:T	rs138965061	6	33581150	7.494e-16	3	rs138965061;rs1830873;rs942639
2	162	2	6:33583732:A:G	rs13203795	6	33583732	4.989e-28	5	rs13203795;rs1830873;rs3763254;rs9461875;rs386906
2	163	2	6:33584639:A:G	rs6924010	6	33584639	4.902e-101	3	rs6924010;rs75359196;rs9469552
2	164	2	6:33589032:C:G	rs6910386	6	33589032	4.794e-77	5	rs6910386;rs73408232;rs187984126;rs114972028;rs138612476
2	165	2	6:33605341:A:G	rs139811108	6	33605341	1.886e-11	5	rs139811108;rs117270633;rs74622024;rs116199362;rs117184686
2	166	2	6:33609435:C:G	rs149728929	6	33609435	9.829e-14	3	rs149728929;rs11967839;rs145847433
2	167	2	6:33618162:A:T	rs9394159	6	33618162	2.399e-272	5	rs9394159;rs1830873;rs942639;rs9469552;rs407415
2	168	2	6:33632073:C:T	rs144156751	6	33632073	1.316e-10	1	rs144156751
2	169	2	6:33667965:G:T	rs594223	6	33667965	3.731e-12	4	rs594223;rs9348925;rs145847433;rs11967839
2	170	2	6:33734793:A:G	rs943469	6	33734793	2.732e-77	5	rs943469;rs111441255;rs78531919;rs117270633;rs74622024
2	171	2	6:33788637:C:G	rs9368777	6	33788637	1.232e-144	9	rs9368777;rs73747323;rs7761859;rs3998108;rs4713711;rs538693715;rs150273297;rs9348925;rs111441255
2	172	2	6:33797628:A:C	rs112733238	6	33797628	3.769e-77	3	rs112733238;rs7761859;rs2209345
2	173	2	6:33818001:A:G	rs4711356	6	33818001	1.203e-26	5	rs4711356;rs117270633;rs145847433;rs78531919;rs7761859
2	174	2	6:33818725:A:G	rs183661661	6	33818725	4.494e-10	2	rs183661661;rs62397636
2	175	2	6:33819582:A:G	rs11753213	6	33819582	1.144e-110	2	rs11753213;rs3998108
2	176	2	6:33825358:A:G	rs2104362	6	33825358	9.97e-285	5	rs2104362;rs3998108;rs1853656;rs12211048;rs7761859
2	177	2	6:33847919:A:C	rs6912350	6	33847919	9.206e-254	3	rs6912350;rs3823428;rs4713711
2	178	2	6:33863662:A:G	rs1998630	6	33863662	7.815e-130	2	rs1998630;rs3823428
2	179	2	6:33864354:A:G	rs7741871	6	33864354	6.196e-111	5	rs7741871;rs67136908;rs3998108;rs62397636;rs4713711
2	180	2	6:33872561:A:G	rs4713719	6	33872561	5.031e-296	5	rs4713719;rs79756150;rs9368784;rs2477239;rs3800341
2	181	2	6:33879800:A:G	rs4711366	6	33879800	1.196e-112	5	rs4711366;rs79756150;rs2499768;rs1324578;rs2477239
2	182	2	6:33889404:A:G	rs2499761	6	33889404	6.127e-243	5	rs2499761;rs2499768;rs9368784;rs1324578;rs9394179
2	183	2	6:33902653:C:T	rs6457749	6	33902653	3.054e-106	3	rs6457749;rs6939337;rs2499768
2	184	2	6:33904769:A:C	rs7740698	6	33904769	1.16e-08	1	rs7740698
2	185	2	6:33904869:A:T	rs12204020	6	33904869	1.697e-12	1	rs12204020
2	186	2	6:33933481:A:G	rs62399336	6	33933481	1.862e-124	3	rs62399336;rs2499743;rs2495968
2	187	2	6:33936925:A:G	rs7755524	6	33936925	1.053e-39	1	rs7755524
2	188	2	6:33951866:C:T	rs77732451	6	33951866	1.054e-09	1	rs77732451
2	189	2	6:33952531:A:G	rs140007014	6	33952531	2.716e-43	8	rs140007014;rs145371853;rs184714444;rs67136908;rs538693715;rs210159;rs150273297;rs10807127
2	190	2	6:33956472:C:T	rs4256433	6	33956472	5.083e-141	3	rs4256433;rs2499766;rs2495986
2	191	2	6:33963009:C:G	rs2495994	6	33963009	8.462e-150	2	rs2495994;rs2495996
2	192	2	6:34006413:A:G	rs75635731	6	34006413	7.908e-11	1	rs75635731
2	193	2	6:34051334:A:G	rs9368792	6	34051334	4.656e-88	5	rs9368792;rs4713740;rs2495999;rs2229900;rs9469702
2	194	2	6:34055485:A:C	rs11968206	6	34055485	7.209e-24	2	rs11968206;rs13196449
2	195	2	6:34056583:A:G	rs9469711	6	34056583	1.425e-164	7	rs9469711;rs4713740;rs6913755;rs7756506;rs13210489;rs200824858;rs34191868
2	196	2	6:34072561:C:T	rs7763695	6	34072561	2.744e-75	4	rs7763695;rs6913755;rs2495996;rs2451361
2	197	2	6:34102680:A:C	rs3756925	6	34102680	8.61e-10	1	rs3756925
2	198	2	6:34110808:C:G	rs75432840	6	34110808	2e-29	4	rs75432840;rs4711383;rs79266576;rs6913755
2	199	2	6:34113984:C:G	rs117885712	6	34113984	1.826e-10	3	rs117885712;rs4711383;rs13196449
2	200	2	6:34116700:G:T	rs182291280	6	34116700	6.523e-29	7	rs182291280;rs145223175;rs149743744;rs187984126;rs114972028;rs73408232;rs568421342
2	201	2	6:34174662:C:T	rs1759639	6	34174662	2.635e-146	2	rs1759639;rs9357175
2	202	2	6:34351767:A:G	rs3778077	6	34351767	9.804e-130	2	rs3778077;rs9357175
2	203	2	6:34434715:A:C	rs9296115	6	34434715	6.313e-84	1	rs9296115
2	204	2	6:34460416:C:T	rs7454888	6	34460416	1.178e-15	3	rs7454888;rs71567453;rs3846867
2	205	2	6:34483015:C:T	rs4713808	6	34483015	1.638e-97	4	rs4713808;rs71567453;rs3778070;rs3846867			Note: No: Index of lead SNPs GenomicLocus: Multiple independent lead SNPs can be assigned to the same genomic locus. uniqID: Unique ID of SNPs consists of chr:position:allele1:allele2 where alleles are alphabetically ordered. rsID: rsID of the SNP. chr: chromosome pos: position on hg19 p: P-value (from the GWAS results).
2	206	2	6:34491013:A:G	rs73746675	6	34491013	1.512e-218	4	rs73746675;rs3798543;rs9791348;rs3846867
2	207	2	6:34545999:A:C	rs205270	6	34545999	1.207e-152	4	rs205270;rs9791348;rs71567453;rs3798543
2	208	2	6:34684227:C:T	rs117833645	6	34684227	1.652e-08	2	rs117833645;rs74469408
2	209	2	6:34779463:C:G	rs6457793	6	34779463	4.918e-115	7	rs6457793;rs13218101;rs6930756;rs2762346;rs732594;rs2395618;rs2814953
2	210	2	6:34935319:A:T	rs201495468	6	34935319	4.911e-13	5	rs201495468;rs820077;rs6930756;rs2814953;rs13218101
2	211	2	6:35160008:A:G	rs3800397	6	35160008	2.022e-34	3	rs3800397;rs138807262;rs145371853
2	212	2	6:35198438:C:T	rs117462486	6	35198438	1.157e-10	1	rs117462486
2	213	2	6:35233369:C:T	rs188106794	6	35233369	8.773e-26	5	rs188106794;rs80105605;rs558815327;rs148914899;rs149743744
2	214	2	6:35326326:C:T	rs187472977	6	35326326	8.333e-39	2	rs187472977;rs182141146
2	215	2	6:35354116:C:T	rs7763692	6	35354116	2.214e-10	1	rs7763692
2	216	2	6:35356143:A:G	rs3777744	6	35356143	3.788e-56	9	rs3777744;rs9394299;rs74469408;rs820077;rs73745097;rs2762346;rs3777748;rs732594;rs2395618
2	217	2	6:35417327:A:G	rs74292915	6	35417327	5.483e-09	5	rs74292915;rs4711416;rs9394299;rs199931645;rs3734252
2	218	2	6:35420967:A:G	rs11755391	6	35420967	4.227e-75	8	rs11755391;rs1051952;rs4713902;rs2762346;rs732594;rs2395618;rs2206030;rs9470027
2	219	2	6:35443573:G:T	rs2076170	6	35443573	3.158e-64	4	rs2076170;rs2814953;rs2762346;rs4711416
2	220	2	6:35491503:C:T	rs137907976	6	35491503	3.812e-16	5	rs137907976;rs76193778;rs182141146;rs141220006;rs7738710
2	221	2	6:35500433:C:T	rs9368873	6	35500433	1.721e-58	3	rs9368873;rs10947552;rs1051952
2	222	2	6:35526032:A:C	rs1984117	6	35526032	1.91e-22	7	rs1984117;rs112246428;rs4713902;rs76193778;rs9380528;rs10947552;rs79695331
2	223	2	6:35702887:A:G	rs2817038	6	35702887	9.496e-90	7	rs2817038;rs2817044;rs7738710;rs12181820;rs79695331;rs112246428;rs9380528
2	224	2	6:35703876:A:T	rs149712527	6	35703876	1.422e-12	4	rs149712527;rs148914899;rs149743744;rs558815327
2	225	2	6:35739341:A:G	rs1343796	6	35739341	2.191e-141	3	rs1343796;rs2817044;rs2817045
2	226	2	6:35752459:C:T	rs2766585	6	35752459	5.916e-59	4	rs2766585;rs2817012;rs12210988;rs2766575
2	227	2	6:35756082:C:G	rs9462110	6	35756082	9.794e-20	4	rs9462110;rs2817012;rs16881066;rs2817044
2	228	2	6:35820544:C:G	rs2395637	6	35820544	4.663e-120	9	rs2395637;rs12210988;rs10755688;rs2071863;rs4713923;rs2766575;rs2817012;rs16881066;rs9470134
2	229	2	6:35913124:A:G	rs117903426	6	35913124	1.993e-08	2	rs117903426;rs9470134
2	230	2	6:36082616:A:G	rs72657687	6	36082616	1.394e-59	9	rs72657687;rs2071863;rs72657688;rs2817012;rs16881066;rs9470134;rs12210988;rs10755688;rs16884857
2	231	2	6:36144958:C:T	rs9394333	6	36144958	1.129e-27	3	rs9394333;rs72657688;rs12201042
2	232	2	6:36197284:A:G	rs58321576	6	36197284	1.894e-09	2	rs58321576;rs12201042
2	233	2	6:36228600:G:T	rs9470238	6	36228600	1.536e-22	3	rs9470238;rs2071863;rs72657688
2	234	2	6:36230135:A:G	rs4713944	6	36230135	1.3e-24	1	rs4713944
2	235	2	6:36254854:C:T	rs6457895	6	36254854	1.962e-66	1	rs6457895
2	236	2	6:36267519:C:T	rs11754972	6	36267519	6.545e-28	1	rs11754972
2	237	2	6:36269725:A:G	rs34598813	6	36269725	2.896e-08	1	rs34598813
2	238	2	6:36287312:C:G	rs743852	6	36287312	1.482e-10	1	rs743852
2	239	2	6:36289145:A:C	rs763018	6	36289145	8.026e-35	1	rs763018
2	240	2	6:36318575:C:T	rs2269563	6	36318575	3.114e-25	2	rs2269563;rs62403705
2	241	2	6:36342181:C:T	rs6457907	6	36342181	2.239e-131	4	rs6457907;rs4713959;rs11966082;rs744848
2	242	2	6:36380644:C:T	rs6457915	6	36380644	7.75e-09	3	rs6457915;rs11757842;rs7776298
2	243	2	6:36552877:A:T	rs12215712	6	36552877	7.742e-18	3	rs12215712;rs236414;rs138684015
2	244	2	6:36556730:C:T	rs9380582	6	36556730	8.994e-44	4	rs9380582;rs200827677;rs11757842;rs7776298
2	245	2	6:36620499:C:G	rs10947616	6	36620499	1.958e-32	4	rs10947616;rs1059234;rs76933890;rs236486
2	246	2	6:36645696:A:G	rs2395655	6	36645696	5.85e-23	3	rs2395655;rs9394372;rs929051
2	247	2	6:36707501:A:G	rs6904294	6	36707501	4.697e-25	3	rs6904294;rs236426;rs236486
2	248	2	6:36720066:C:T	rs58471412	6	36720066	1.46e-128	3	rs58471412;rs3213538;rs929051
2	249	2	6:36745540:C:G	rs144332307	6	36745540	6.454e-31	3	rs144332307;rs9349011;rs929051
2	250	2	6:36747889:C:T	rs236416	6	36747889	2.098e-28	4	rs236416;rs236486;rs4236052;rs236426
2	251	2	6:36753463:C:T	rs236413	6	36753463	3.86e-36	3	rs236413;rs3213538;rs4236052
2	252	2	6:36755668:A:G	rs9380602	6	36755668	6.466e-31	2	rs9380602;rs3213538
2	253	2	6:36766292:C:T	rs6940728	6	36766292	1.951e-21	2	rs6940728;rs236349
2	254	2	6:36779998:A:T	rs236389	6	36779998	4.16e-11	3	rs236389;rs236349;rs374360645
2	255	2	6:36789547:A:G	rs236377	6	36789547	7.657e-28	3	rs236377;rs236349;rs374360645
2	256	2	6:36791412:A:C	rs4714014	6	36791412	5.003e-09	1	rs4714014
2	257	2	6:36908382:A:G	rs697749	6	36908382	2.428e-13	1	rs697749
2	258	2	6:36919148:C:T	rs4714027	6	36919148	8.357e-75	2	rs4714027;rs1063021
2	259	2	6:36960738:G:T	rs4714030	6	36960738	6.33e-23	2	rs4714030;rs3778027
2	260	2	6:36968063:A:T	rs16889370	6	36968063	9.04e-299	7	rs16889370;rs9296213;rs9380645;rs2797779;rs60066809;rs138684015;rs10947652
2	261	2	6:36988364:C:T	rs831504	6	36988364	3.526e-18	2	rs831504;rs9470463
2	262	2	6:36996773:C:G	rs708017	6	36996773	4.06e-114	4	rs708017;rs9470463;rs73411578;rs9296213
2	263	2	6:37061182:C:T	rs9366929	6	37061182	2.452e-12	4	rs9366929;rs9296213;rs9368984;rs73411578
2	264	2	6:37113546:A:G	rs2788078	6	37113546	5.825e-146	2	rs2788078;rs10947660
2	265	2	6:37129932:A:C	rs262909	6	37129932	3.656e-27	1	rs262909
2	266	2	6:37500067:A:G	rs2246439	6	37500067	9.69e-23	3	rs2246439;rs2797777;rs2254710
2	267	2	6:37526918:A:G	rs7739470	6	37526918	1.609e-21	3	rs7739470;rs9369009;rs2797777
2	268	2	6:37557978:A:G	rs1776441	6	37557978	2.364e-24	3	rs1776441;rs2797777;rs9369009
2	269	2	6:37572144:G:T	rs7773994	6	37572144	7.801e-12	2	rs7773994;rs9369009
2	270	2	6:37597129:C:T	rs3734316	6	37597129	7.648e-13	1	rs3734316
2	271	2	6:37606805:A:G	rs10947686	6	37606805	3.408e-14	1	rs10947686
2	272	2	6:37633072:A:G	rs6903441	6	37633072	1.006e-09	1	rs6903441
2	273	2	6:37644569:A:G	rs1972187	6	37644569	1.342e-10	1	rs1972187
2	274	2	6:37648778:C:G	rs570911662	6	37648778	4.808e-11	1	rs570911662
2	275	2	6:37648790:A:C	rs73734242	6	37648790	1.869e-79	2	rs73734242;rs60066809
2	276	2	6:37688151:C:T	rs6458014	6	37688151	1.02e-08	1	rs6458014
2	277	2	6:37722549:G:T	rs6922267	6	37722549	4.629e-12	2	rs6922267;rs9470825
2	278	2	6:37791578:G:T	rs259720	6	37791578	2.023e-23	4	rs259720;rs6458040;rs9470825;rs9369022
2	279	2	6:37954591:C:T	rs72850871	6	37954591	3.84e-126	3	rs72850871;rs12200524;rs60066809
2	280	2	6:37969064:A:C	rs6933547	6	37969064	1.652e-08	1	rs6933547
2	281	2	6:38223807:C:T	rs9369042	6	38223807	5.418e-29	1	rs9369042
2	282	2	6:38244233:C:G	rs9462423	6	38244233	4.477e-08	2	rs9462423;rs6458040
2	283	2	6:38467664:A:G	rs12206905	6	38467664	2.358e-62	7	rs12206905;rs12200524;rs60066809;rs10947722;rs4626419;rs12208912;rs9366958
2	284	2	6:38991516:C:G	rs761385	6	38991516	8.635e-21	2	rs761385;rs9380810
2	285	2	6:39183470:C:T	rs10456100	6	39183470	7.999e-18	1	rs10456100
2	286	2	6:39244185:A:G	rs2815046	6	39244185	1.686e-16	1	rs2815046
2	287	2	6:39342344:C:T	rs72860035	6	39342344	1.671e-67	4	rs72860035;rs6458131;rs12200524;rs4714239
2	288	2	6:39743239:C:T	rs302615	6	39743239	2.059e-09	1	rs302615
2	289	3	6:55770337:A:G	rs1596976	6	55770337	1.401e-08	1	rs1596976
2	290	3	6:55992706:C:T	rs4452633	6	55992706	1.017e-10	2	rs4452633;rs3899395
2	291	3	6:56941361:C:T	rs8180538	6	56941361	2.543e-17	2	rs8180538;rs1562908
2	292	3	6:57063946:A:G	rs12195875	6	57063946	1.944e-17	1	rs12195875
2	293	3	6:57106703:C:T	rs148108129	6	57106703	2.295e-39	6	rs148108129;rs7738699;rs117602279;rs146941321;rs141007158;rs144804328
2	294	3	6:57160897:A:G	rs7767082	6	57160897	9.855e-14	1	rs7767082
2	295	3	6:57176499:A:G	rs6916718	6	57176499	1.033e-12	1	rs6916718
2	296	3	6:57201132:A:G	rs7754091	6	57201132	3.194e-09	1	rs7754091
2	297	4	6:58371737:A:G	rs62464130	6	58371737	2.771e-16	1	rs62464130
2	298	5	6:62948594:C:T	rs176614	6	62948594	2.955e-19	3	rs176614;rs9294075;rs419585
2	299	5	6:63224998:A:G	rs6910728	6	63224998	9.489e-27	6	rs6910728;rs6902092;rs4710385;rs4710240;rs7741257;rs4644036
2	300	5	6:63536078:A:C	rs9447429	6	63536078	2.762e-110	7	rs9447429;rs9294075;rs150454580;rs139753688;rs75465119;rs79865883;rs62419097
2	301	5	6:63984410:G:T	rs9341780	6	63984410	2.291e-08	1	rs9341780
2	302	5	6:64087836:A:G	rs824386	6	64087836	9.84e-13	1	rs824386
2	303	5	6:64850264:A:T	rs76001748	6	64850264	1.321e-56	7	rs76001748;rs78749362;rs77102820;rs114247491;rs12215142;rs79990121;rs150454580
2	304	5	6:65305659:C:T	rs12209029	6	65305659	7.483e-09	1	rs12209029
2	305	5	6:65484758:A:G	rs2055172	6	65484758	6.475e-16	2	rs2055172;rs12215142
2	306	5	6:65602149:A:G	rs78255139	6	65602149	2.955e-12	3	rs78255139;rs114247491;rs12215142
2	307	6	11:45730520:A:C	rs192387104	11	45730520	5.79e-11	1	rs192387104
2	308	7	11:46394844:G:T	rs146364498	11	46394844	3.227e-09	2	rs146364498;rs74333972
2	309	7	11:47448547:C:G	rs61895077	11	47448547	5.114e-12	2	rs61895077;rs7130402
2	310	7	11:47462176:A:G	rs78559029	11	47462176	5.824e-25	2	rs78559029;rs75874665
2	311	7	11:48234924:A:G	rs7927965	11	48234924	8.701e-13	3	rs7927965;rs4929891;rs11820480
2	312	7	11:48346996:A:G	rs12794960	11	48346996	6.548e-98	4	rs12794960;rs11604358;rs75874665;rs7130402
2	313	7	11:49255389:C:T	rs4103567	11	49255389	9.42e-16	3	rs4103567;rs28417656;rs4929891
2	314	7	11:49791685:G:T	rs34381887	11	49791685	2.368e-143	5	rs34381887;rs28417656;rs1522925;rs11604358;rs4929891
2	315	7	11:51422683:A:G	rs560036	11	51422683	1.228e-09	1	rs560036
2	316	8	11:55270032:C:T	rs12802877	11	55270032	5.215e-122	6	rs12802877;rs479013;rs11230593;rs10897182;rs28681529;rs57377676
2	317	8	11:56306773:A:C	rs9651721	11	56306773	2.259e-97	10	rs9651721;rs4479008;rs1943637;rs1938746;rs17640952;rs116953908;rs75419177;rs10897182;rs28681529;rs57377676
2	318	8	11:56492866:A:T	rs61902472	11	56492866	4.81e-20	8	rs61902472;rs1943637;rs61902518;rs7109192;rs28681529;rs57377676;rs11228263;rs4479008
2	319	8	11:56573675:A:G	rs141394107	11	56573675	6.611e-39	3	rs141394107;rs116953908;rs146424536
2	320	8	11:56670053:A:C	rs1783464	11	56670053	1.026e-08	1	rs1783464
2	321	8	11:56788423:A:G	rs138238752	11	56788423	6.686e-23	1	rs138238752
2	322	8	11:57661969:A:G	rs144755777	11	57661969	2.427e-13	4	rs144755777;rs79259591;rs116953908;rs146424536
3	1	1	6:21581616:A:G	rs114997359	6	21581616	1.331e-08	1	rs114997359
3	2	1	6:21866147:A:G	rs560003547	6	21866147	4.001e-65	2	rs560003547;rs11970030
3	3	1	6:22041133:A:G	rs2328662	6	22041133	1.879e-20	1	rs2328662
3	4	1	6:22289140:C:T	rs1205957	6	22289140	4.376e-11	2	rs1205957;rs1205893
3	5	2	6:22974226:C:T	rs9393360	6	22974226	2.618e-14	3	rs9393360;rs2498256;rs4712727
3	6	2	6:23197535:C:G	rs71535558	6	23197535	8.778e-15	1	rs71535558
3	7	2	6:23315461:C:T	rs1072731	6	23315461	4.475e-21	1	rs1072731
3	8	2	6:23342232:A:G	rs9379498	6	23342232	2.64e-22	1	rs9379498
3	9	2	6:23381935:C:T	rs9393408	6	23381935	5.168e-09	1	rs9393408
3	10	2	6:23435415:A:G	rs199035	6	23435415	1.006e-09	1	rs199035
3	11	2	6:23451412:A:G	rs4712766	6	23451412	1.939e-21	1	rs4712766
3	12	2	6:23462774:A:C	rs9356865	6	23462774	1.296e-10	1	rs9356865
3	13	2	6:23506477:C:T	rs719437	6	23506477	6.161e-93	1	rs719437
3	14	2	6:23521465:C:T	rs199099	6	23521465	9.975e-18	2	rs199099;rs7749787
3	15	2	6:23593375:A:G	rs197988	6	23593375	1.362e-10	1	rs197988
3	16	2	6:23657168:C:T	rs550050	6	23657168	1.118e-19	1	rs550050
3	17	2	6:23685117:C:T	rs12191169	6	23685117	1.6e-128	8	rs12191169;rs7754882;rs2328791;rs2328780;rs13206774;rs6456577;rs9379536;rs526263
3	18	2	6:23709107:A:G	rs2038827	6	23709107	2.045e-14	5	rs2038827;rs2328780;rs13206774;rs6922292;rs2203083
3	19	2	6:23805281:A:G	rs9348608	6	23805281	8.904e-28	6	rs9348608;rs2328814;rs6922292;rs2203083;rs2328791;rs13206774
3	20	2	6:23856148:A:G	rs77658397	6	23856148	7.84e-97	6	rs77658397;rs6922292;rs2203083;rs7754882;rs13206774;rs6456577
3	21	2	6:23909811:A:C	rs481314	6	23909811	2.103e-25	1	rs481314
3	22	2	6:23934310:C:T	rs540748	6	23934310	6.185e-25	2	rs540748;rs1511466
3	23	2	6:23942549:C:T	rs113004122	6	23942549	3.401e-304	1	rs113004122
3	24	2	6:23962105:G:T	rs578632	6	23962105	1.465e-17	3	rs578632;rs9295612;rs9379620
3	25	2	6:23964851:A:G	rs707876	6	23964851	5.826e-21	2	rs707876;rs9295612
3	26	2	6:24014419:G:T	rs9358739	6	24014419	1.445e-32	2	rs9358739;rs9295612
3	27	2	6:24026095:A:G	rs9356920	6	24026095	3.989e-33	1	rs9356920
3	28	2	6:24079756:A:G	rs12216082	6	24079756	1.08e-17	2	rs12216082;rs9358742
3	29	2	6:24105447:A:G	rs9379643	6	24105447	1.223e-55	2	rs9379643;rs3178
3	30	2	6:24108657:A:T	rs12662101	6	24108657	3.201e-63	2	rs12662101;rs61528653
3	31	2	6:24277488:C:T	rs9393547	6	24277488	1.285e-08	1	rs9393547
3	32	2	6:24370358:C:T	rs793664	6	24370358	1.317e-57	4	rs793664;rs6456614;rs793850;rs3846829
3	33	2	6:24391075:A:G	rs793676	6	24391075	8.811e-67	1	rs793676
3	34	2	6:24436760:A:G	rs2273605	6	24436760	2.955e-63	5	rs2273605;rs6456614;rs2793444;rs760904;rs807531
3	35	2	6:24464511:G:T	rs2817244	6	24464511	5.751e-186	5	rs2817244;rs760904;rs9467203;rs807541;rs2793444
3	36	2	6:24484629:A:C	rs114693458	6	24484629	2.105e-10	2	rs114693458;rs760904
3	37	2	6:24582209:A:T	rs57310311	6	24582209	1.606e-08	3	rs57310311;rs144350646;rs76282978
3	38	2	6:24585547:A:G	rs2760135	6	24585547	2.375e-97	5	rs2760135;rs3181238;rs7765052;rs6941866;rs807531
3	39	2	6:24618761:A:G	rs56895808	6	24618761	8.355e-18	1	rs56895808
3	40	2	6:24650671:C:T	rs707887	6	24650671	6.476e-10	3	rs707887;rs7765052;rs6941866
3	41	2	6:24650761:A:G	rs3087943	6	24650761	3.001e-08	2	rs3087943;rs116596225
3	42	2	6:24699652:A:C	rs60555264	6	24699652	2.865e-21	3	rs60555264;rs3181238;rs116596225
3	43	2	6:24771431:A:C	rs2493333	6	24771431	1.46e-14	3	rs2493333;rs9366581;rs2754772
3	44	2	6:24795680:C:T	rs6910956	6	24795680	1.128e-20	3	rs6910956;rs2754772;rs9366581
3	45	2	6:24830306:C:G	rs56733961	6	24830306	6.082e-53	7	rs56733961;rs79868980;rs9393592;rs7765052;rs2754772;rs9366581;rs61528548
3	46	2	6:24844443:C:T	rs10946731	6	24844443	2.888e-10	1	rs10946731
3	47	2	6:24881498:C:T	rs6930916	6	24881498	7.468e-108	5	rs6930916;rs2817726;rs430661;rs1739316;rs4431425
3	48	2	6:24928081:A:G	rs55927112	6	24928081	6.446e-14	2	rs55927112;rs138711481
3	49	2	6:24942042:A:G	rs13202601	6	24942042	2.078e-08	1	rs13202601
3	50	2	6:24951199:A:G	rs647297	6	24951199	2.211e-19	1	rs647297
3	51	2	6:24951809:A:G	rs387628	6	24951809	1.702e-106	1	rs387628
3	52	2	6:25028200:A:C	rs9356958	6	25028200	2.72e-85	2	rs9356958;rs9348651
3	53	2	6:25077007:G:T	rs143743502	6	25077007	5.44e-14	1	rs143743502
3	54	2	6:25111239:A:G	rs1972205	6	25111239	6.11e-210	3	rs1972205;rs12529629;rs9356960
3	55	2	6:25141224:C:T	rs3749873	6	25141224	2.717e-22	2	rs3749873;6:25003339
3	56	2	6:25227378:C:T	rs9356969	6	25227378	9.998e-279	5	rs9356969;rs9393632;rs9358849;rs5008131;rs9467438
3	57	2	6:25239716:A:C	rs9379740	6	25239716	4.138e-101	8	rs9379740;rs9379740;rs9393632;rs9358849;rs2690123;rs9393632;rs9467438;rs9379740
3	58	2	6:25245873:A:G	rs80272928	6	25245873	2.022e-24	5	rs80272928;rs78612998;rs138711481;rs2744563;6:25003339
3	59	2	6:25315540:C:T	rs6936496	6	25315540	9.218e-10	2	rs6936496;rs10456320
3	60	2	6:25334288:A:C	rs2744306	6	25334288	1.001e-198	7	rs2744306;rs2690098;rs2690059;rs4711082;rs13214013;rs2690123;rs2690112
3	61	2	6:25336424:C:G	rs11754685	6	25336424	1.381e-136	5	rs11754685;rs2690059;rs1927695;rs9393632;rs9358849
3	62	2	6:25338021:G:T	rs2744227	6	25338021	5.695e-144	3	rs2744227;rs2690059;rs2690112
3	63	2	6:25347646:G:T	rs6456671	6	25347646	1.792e-22	3	rs6456671;rs1927695;rs77656204
3	64	2	6:25400396:A:C	rs4712929	6	25400396	8.538e-20	4	rs4712929;rs13214013;rs2690098;rs4711082
3	65	2	6:25411187:C:T	rs146458991	6	25411187	5.952e-24	2	rs146458991;rs72830743
3	66	2	6:25412628:A:G	rs927986	6	25412628	9.514e-88	3	rs927986;rs2690059;rs77551782
3	67	2	6:25414846:A:G	rs1927693	6	25414846	3.76e-286	3	rs1927693;rs9366624;rs62392388
3	68	2	6:25415845:A:G	rs11752825	6	25415845	3.92e-253	4	rs11752825;rs9366624;rs62392388;rs6934330
3	69	2	6:25423879:C:T	rs72831251	6	25423879	8.991e-19	2	rs72831251;rs76417859
3	70	2	6:25424256:A:G	rs12213948	6	25424256	3.925e-242	3	rs12213948;rs9366624;rs62392388
3	71	2	6:25435552:A:G	rs76448003	6	25435552	2.177e-23	2	rs76448003;rs62392388
3	72	2	6:25488583:C:T	rs2274089	6	25488583	8.688e-12	1	rs2274089
3	73	2	6:25490089:C:T	rs301394	6	25490089	0	3	rs301394;rs2072848;rs384340
3	74	2	6:25504877:C:T	rs12525553	6	25504877	8.788e-105	3	rs12525553;rs2072848;rs384340
3	75	2	6:25669278:G:T	rs56206297	6	25669278	6.926e-26	3	rs56206297;rs16890663;rs2072848
3	76	2	6:25682044:G:T	rs138531232	6	25682044	3.277e-08	1	rs138531232
3	77	2	6:25684405:C:T	rs4711092	6	25684405	2.704e-196	1	rs4711092
3	78	2	6:25692021:C:T	rs76772871	6	25692021	2.931e-11	1	rs76772871
3	79	2	6:25750896:A:G	rs191929921	6	25750896	9.419e-29	2	rs191929921;rs60892124
3	80	2	6:25752628:A:G	rs116956053	6	25752628	2.549e-10	2	rs116956053;rs76703022
3	81	2	6:25960799:C:T	rs117965842	6	25960799	2.318e-12	1	rs117965842
3	82	2	6:26023032:C:T	rs72834629	6	26023032	3.984e-18	5	rs72834629;rs76703022;rs717551;rs72830103;rs12210098
3	83	2	6:26107463:A:G	rs198846	6	26107463	3.026e-22	4	rs198846;rs6456691;rs72830103;rs12210098
3	84	2	6:26200752:C:G	rs3757136	6	26200752	1.486e-19	3	rs3757136;rs144350646;rs76282978
3	85	2	6:26205770:A:C	rs9393687	6	26205770	3.043e-24	1	rs9393687
3	86	2	6:26293012:A:G	rs77704135	6	26293012	4.481e-48	2	rs77704135;rs75546109
3	87	2	6:26340872:A:G	rs55964643	6	26340872	1.165e-14	2	rs55964643;rs1796519
3	88	2	6:26344975:C:G	rs10946812	6	26344975	3.786e-102	1	rs10946812
3	89	2	6:26443305:A:G	rs188713930	6	26443305	2.444e-08	1	rs188713930
3	90	2	6:26650110:A:T	rs138644763	6	26650110	8.064e-09	1	rs138644763
3	91	2	6:26681071:C:T	rs142076412	6	26681071	1.132e-16	2	rs142076412;rs76971624
3	92	2	6:26880157:C:T	rs3999347	6	26880157	2.024e-23	1	rs3999347
3	93	2	6:26888304:C:T	rs187242505	6	26888304	1.763e-31	4	rs187242505;rs4434463;rs12201802;rs2130655
3	94	2	6:27017692:C:T	rs139466626	6	27017692	3.508e-08	1	rs139466626
3	95	2	6:27187925:A:T	rs566962549	6	27187925	3.476e-12	1	rs566962549
3	96	2	6:27287800:C:T	rs12174489	6	27287800	1.199e-231	2	rs12174489;rs149260225
3	97	2	6:27411988:C:T	rs79744712	6	27411988	3.17e-26	2	rs79744712;rs149087883
3	98	2	6:27574908:A:C	rs142970147	6	27574908	3.83e-36	5	rs142970147;rs117183430;rs9368537;rs117680617;rs76439045
3	99	2	6:27684507:A:G	rs72845876	6	27684507	3.783e-62	4	rs72845876;rs12192568;rs143144207;rs143583725
3	100	2	6:27923257:A:G	rs148612161	6	27923257	3.287e-12	2	rs148612161;rs180803647
3	101	2	6:27982501:A:C	6:27982501	6	27982501	1.018e-11	1	6:27982501
3	102	2	6:28071393:C:T	rs188105	6	28071393	1.807e-290	6	rs188105;rs34024998;rs74967533;rs9368537;rs276362;rs184084677
3	103	2	6:28225296:A:G	rs149204020	6	28225296	2.404e-12	4	rs149204020;6:28713434;rs118168437;rs77396427
3	104	2	6:28464927:A:T	rs183719819	6	28464927	4.537e-33	2	rs183719819;rs12206581
3	105	2	6:28481663:C:T	rs148656136	6	28481663	9.361e-09	2	rs148656136;rs117574667
3	106	2	6:28500911:A:C	rs571726149	6	28500911	1.907e-09	1	rs571726149
3	107	2	6:28516725:A:G	rs79848291	6	28516725	1.82e-49	4	rs79848291;rs112988227;rs2235359;rs74967533
3	108	2	6:28547215:A:G	rs117423601	6	28547215	2.481e-34	5	rs117423601;rs3129789;rs9468500;rs9257696;rs115175926
3	109	2	6:28647722:C:T	rs117585327	6	28647722	1.892e-25	3	rs117585327;rs117846312;rs148672491
3	110	2	6:28677498:A:G	rs139675877	6	28677498	1.095e-15	4	rs139675877;6:28713434;rs185939481;rs77396427
3	111	2	6:28684132:C:T	rs115397636	6	28684132	1.645e-10	1	rs115397636
3	112	2	6:28686284:C:T	rs2394152	6	28686284	0	5	rs2394152;rs7763390;rs12055619;rs3129789;rs9283885
3	113	2	6:28742331:C:T	rs79128439	6	28742331	2.21e-36	7	rs79128439;rs41316602;rs112421807;rs112988227;rs9468500;rs115175926;rs7763390
3	114	2	6:28914656:C:T	rs150843095	6	28914656	1.754e-12	4	rs150843095;rs112988227;rs115175926;rs76033823
3	115	2	6:28919625:A:G	rs7745220	6	28919625	4.376e-64	7	rs7745220;rs9283885;rs9257696;rs77454196;rs12206581;rs7763390;rs117574667
3	116	2	6:28956539:A:C	rs116869972	6	28956539	4.108e-10	2	rs116869972;rs180803647
3	117	2	6:29229480:A:G	6:29229480	6	29229480	4.47e-33	2	6:29229480;6:28940186
3	118	2	6:29289929:C:T	rs146185592	6	29289929	9.257e-19	5	rs146185592;rs151001546;rs117181567;rs139614182;rs139494877
3	119	2	6:29335080:A:C	rs148472353	6	29335080	7.579e-11	1	rs148472353
3	120	2	6:29343355:C:T	rs9257802	6	29343355	5.28e-69	12	rs9257802;rs1419639;rs115175926;rs151001546;rs9468541;rs139614182;rs139494877;rs41316618;rs9283885;rs9468500;rs116466121;rs7754926
3	121	2	6:29359024:A:G	6:29359024	6	29359024	9.546e-15	1	6:29359024
3	122	2	6:29378439:A:G	rs2097771	6	29378439	9.031e-293	5	rs2097771;rs7349908;rs150971595;rs181752128;rs16894836
3	123	2	6:29393981:C:T	rs140192033	6	29393981	1.761e-35	6	rs140192033;rs7349908;rs362529;rs29263;rs9461540;rs149704780
3	124	2	6:29400236:C:G	rs9257858	6	29400236	1.712e-117	8	rs9257858;rs77454196;rs12206581;rs9468500;rs9257696;rs117680413;rs115175926;rs116963310
3	125	2	6:29427068:A:G	rs59818916	6	29427068	3.654e-21	4	rs59818916;rs58669168;rs41316602;rs142242329
3	126	2	6:29436911:C:T	rs116973845	6	29436911	3.229e-19	2	rs116973845;rs117574667
3	127	2	6:29441502:A:G	rs117137251	6	29441502	2.585e-11	1	rs117137251
3	128	2	6:29451845:C:T	rs118077891	6	29451845	2.222e-10	1	rs118077891
3	129	2	6:29487968:C:T	rs12210150	6	29487968	4.573e-71	4	rs12210150;rs143144207;rs35045623;rs3129789
3	130	2	6:29541910:A:G	rs138633183	6	29541910	5.444e-12	1	rs138633183
3	131	2	6:29555585:A:G	rs17184367	6	29555585	6.824e-269	2	rs17184367;rs150971595
3	132	2	6:29569955:A:G	rs3025643	6	29569955	4.653e-104	1	rs3025643
3	133	2	6:29576393:A:G	rs29230	6	29576393	2.838e-126	8	rs29230;rs29263;rs9461540;rs115175926;rs151001546;rs41317798;rs362529;rs117181567
3	134	2	6:29606761:A:G	rs3095268	6	29606761	2.837e-35	1	rs3095268
3	135	2	6:29614627:C:G	rs7774576	6	29614627	2.259e-62	3	rs7774576;rs117680413;rs116963310
3	136	3	6:33232521:C:T	rs213201	6	33232521	8.728e-143	9	rs213201;rs140814057;rs1800837;rs211468;rs211456;rs9380361;rs210199;rs6914404;rs460568
3	137	3	6:33308499:A:G	rs187984126	6	33308499	3.365e-57	8	rs187984126;rs114972028;rs114993678;rs138892259;rs6910386;rs73408232;rs75552893;rs182291280
3	138	3	6:33461784:A:G	rs34838160	6	33461784	7.106e-50	10	rs34838160;rs9461875;rs138892259;rs386906;rs73408232;rs460568;rs211468;rs114972028;rs114993678;rs211456
3	139	3	6:33525794:A:C	rs79034965	6	33525794	2.528e-10	2	rs79034965;rs13203795
3	140	3	6:33584639:A:G	rs6924010	6	33584639	6.789e-15	2	rs6924010;rs9469552
3	141	3	6:33601132:A:G	rs9469532	6	33601132	1.775e-129	10	rs9469532;rs9394159;rs2274198;rs9469552;rs2281830;rs211456;rs72880049;rs210199;rs386906;rs210164
3	142	3	6:33620397:C:G	rs1830873	6	33620397	9.378e-183	6	rs1830873;rs942639;rs386906;rs138965061;rs13203795;rs9394159
3	143	3	6:33677556:A:C	rs9380374	6	33677556	4.425e-168	8	rs9380374;rs2281830;rs943469;rs4607416;rs7761859;rs2209345;rs942636;rs594223
3	144	3	6:33782173:A:G	rs144326959	6	33782173	8.372e-90	4	rs144326959;rs149728929;rs11967839;rs594223
3	145	3	6:33819582:A:G	rs11753213	6	33819582	7.263e-270	1	rs11753213
3	146	3	6:33825358:A:G	rs2104362	6	33825358	3.693e-71	4	rs2104362;rs1853656;rs12211048;rs7761859
3	147	3	6:33838727:C:T	rs62397636	6	33838727	1.458e-37	2	rs62397636;rs183661661
3	148	3	6:33847919:A:C	rs6912350	6	33847919	2.342e-126	1	rs6912350
3	149	3	6:33863662:A:G	rs1998630	6	33863662	4.649e-86	1	rs1998630
3	150	3	6:33864998:A:G	rs3800341	6	33864998	2.661e-37	2	rs3800341;rs4713719
3	151	3	6:33889404:A:G	rs2499761	6	33889404	5.085e-147	5	rs2499761;rs2499768;rs9368784;rs9296102;rs9394179
3	152	3	6:33901255:C:T	rs2477239	6	33901255	2.155e-113	5	rs2477239;rs9394179;rs4713719;rs4711366;rs9368784
3	153	3	6:33902653:C:T	rs6457749	6	33902653	3.673e-52	3	rs6457749;rs6939337;rs2499768
3	154	3	6:33921175:A:G	rs9469649	6	33921175	4.661e-14	2	rs9469649;rs6939337
3	155	3	6:33926102:G:T	rs2495968	6	33926102	1.246e-87	3	rs2495968;rs62399336;rs2499766
3	156	3	6:33936925:A:G	rs7755524	6	33936925	1.701e-18	1	rs7755524
3	157	3	6:33956472:C:T	rs4256433	6	33956472	8.153e-44	2	rs4256433;rs2499766
3	158	3	6:33963009:C:G	rs2495994	6	33963009	4.565e-49	1	rs2495994
3	159	3	6:33993621:A:T	rs7772932	6	33993621	3.351e-89	6	rs7772932;rs2229900;rs2451361;rs9469702;rs9368792;rs7763695
3	160	3	6:34038597:A:G	rs568421342	6	34038597	1.044e-21	2	rs568421342;rs182291280
3	161	3	6:34055485:A:C	rs11968206	6	34055485	4.445e-09	2	rs11968206;rs13196449
3	162	3	6:34056583:A:G	rs9469711	6	34056583	6.944e-67	4	rs9469711;rs4713740;rs7756506;rs13210489
3	163	3	6:34065234:C:G	rs373645900	6	34065234	2.783e-37	2	rs373645900;rs115459999
3	164	3	6:34110808:C:G	rs75432840	6	34110808	1.411e-17	3	rs75432840;rs2797961;rs77451337
3	165	3	6:34113037:C:G	rs563704938	6	34113037	4.202e-11	2	rs563704938;rs75552893
3	166	3	6:34126264:C:T	rs575553025	6	34126264	4.513e-10	1	rs575553025
3	167	3	6:34154652:C:T	rs145223175	6	34154652	1.159e-17	3	rs145223175;rs149743744;rs182291280
3	168	3	6:34161343:C:G	rs147494818	6	34161343	1.531e-15	1	rs147494818
3	169	3	6:34226337:C:T	rs9357175	6	34226337	4.019e-128	3	rs9357175;rs3778077;rs1759639
3	170	3	6:34434715:A:C	rs9296115	6	34434715	9.211e-43	1	rs9296115
3	171	3	6:34448315:C:T	rs3846867	6	34448315	6.573e-18	3	rs3846867;rs4713808;rs73746675
3	172	3	6:34519547:C:G	rs3778070	6	34519547	2.927e-43	3	rs3778070;rs3798543;rs4713808
3	173	3	6:34545999:A:C	rs205270	6	34545999	2.649e-28	2	rs205270;rs3798543
3	174	3	6:34851558:A:G	rs116921367	6	34851558	7.314e-16	4	rs116921367;rs149743744;rs188106794;rs149712527
3	175	3	6:35078623:C:G	rs2762346	6	35078623	1.865e-48	13	rs2762346;rs3777748;rs732594;rs9469972;rs10484578;rs2206030;rs11755391;rs2076170;rs2814980;rs11758962;rs2092428;rs6930756;rs73745097
3	176	3	6:35416759:A:G	rs9470027	6	35416759	1.696e-09	3	rs9470027;rs11755391;rs4711416
3	177	3	6:35469647:A:G	rs7738710	6	35469647	5.627e-23	5	rs7738710;rs12181820;rs2817038;rs10947552;rs1051952
3	178	3	6:35500433:C:T	rs9368873	6	35500433	2.124e-59	3	rs9368873;rs10947552;rs1051952
3	179	3	6:35579002:A:G	rs3777747	6	35579002	4.658e-26	3	rs3777747;rs2766542;rs10947552
3	180	3	6:35725138:C:T	rs2817045	6	35725138	6.232e-18	3	rs2817045;rs2766575;rs2766542
3	181	3	6:35760403:C:G	rs2817012	6	35760403	3.671e-57	10	rs2817012;rs16881066;rs2395637;rs2295852;rs10755688;rs1100864;rs2071863;rs2766575;rs2766585;rs9462110
3	182	3	6:35783917:C:T	rs35951582	6	35783917	1.641e-86	7	rs35951582;rs2395637;rs2295852;rs10755688;rs1100864;rs2766575;rs2766585
3	183	3	6:36228600:G:T	rs9470238	6	36228600	1.768e-80	3	rs9470238;rs2071863;rs9368908
3	184	3	6:36230135:A:G	rs4713944	6	36230135	6.395e-30	1	rs4713944
3	185	3	6:36254854:C:T	rs6457895	6	36254854	4.412e-09	1	rs6457895
3	186	3	6:36267519:C:T	rs11754972	6	36267519	1.045e-08	1	rs11754972
3	187	3	6:36289145:A:C	rs763018	6	36289145	2.149e-10	1	rs763018
3	188	3	6:36340040:C:G	rs62403705	6	36340040	1.372e-57	4	rs62403705;rs4713959;rs2269563;rs11966082
3	189	3	6:36342181:C:T	rs6457907	6	36342181	3.502e-11	3	rs6457907;rs4713959;rs11966082
3	190	3	6:36412213:C:T	rs11757842	6	36412213	4.563e-20	3	rs11757842;rs9380582;rs200827677
3	191	3	6:36636080:C:T	rs66761782	6	36636080	4.651e-51	2	rs66761782;rs11758192
3	192	3	6:36664280:A:G	rs9394372	6	36664280	6.525e-13	1	rs9394372
3	193	3	6:36700833:C:T	rs236460	6	36700833	4.391e-11	2	rs236460;rs236416
3	194	3	6:36720066:C:T	rs58471412	6	36720066	4.836e-32	1	rs58471412
3	195	3	6:36753140:A:T	rs236414	6	36753140	4.66e-300	3	rs236414;rs139464908;rs7747233
3	196	3	6:36766292:C:T	rs6940728	6	36766292	2.638e-10	1	rs6940728
3	197	3	6:36919148:C:T	rs4714027	6	36919148	1.574e-15	2	rs4714027;rs1063021
3	198	3	6:36950412:A:G	rs111469215	6	36950412	1.92e-38	3	rs111469215;rs139464908;rs10947652
3	199	3	6:36996773:C:G	rs708017	6	36996773	1.281e-09	1	rs708017
3	200	3	6:37142422:C:T	rs10507	6	37142422	1.818e-15	2	rs10507;rs2788078
3	201	3	6:37636933:C:T	rs72847488	6	37636933	1.524e-10	4	rs72847488;rs6458013;rs139464908;rs7747233
3	202	4	11:47448547:C:G	rs61895077	11	47448547	4.135e-08	2	rs61895077;rs7130402
3	203	4	11:47462176:A:G	rs78559029	11	47462176	4.071e-16	2	rs78559029;rs75874665
3	204	4	11:48346996:A:G	rs12794960	11	48346996	7.9e-68	4	rs12794960;rs11604358;rs75874665;rs7130402
3	205	4	11:49748458:C:T	rs371079883	11	49748458	1.193e-94	3	rs371079883;rs11604358;rs4929891
3	206	5	11:55116290:G:T	rs12789208	11	55116290	8.634e-83	3	rs12789208;rs10897182;rs28681529
3	207	5	11:56274176:C:G	rs12277890	11	56274176	1.631e-73	8	rs12277890;rs1943637;rs1938746;rs17640952;rs116953908;rs75419177;rs10897182;rs28681529
3	208	5	11:56566605:G:T	rs528894	11	56566605	4.237e-11	2	rs528894;rs111772208
3	209	5	11:56573675:A:G	rs141394107	11	56573675	7.66e-30	3	rs141394107;rs116953908;rs146424536
3	210	5	11:56788423:A:G	rs138238752	11	56788423	2.445e-13	1	rs138238752
4	1	1	6:23909811:A:C	rs481314	6	23909811	3.351e-09	1	rs481314
4	2	1	6:23942549:C:T	rs113004122	6	23942549	1.292e-08	1	rs113004122
4	3	1	6:23960520:A:G	rs117379952	6	23960520	6.353e-53	1	rs117379952
4	4	1	6:24026095:A:G	rs9356920	6	24026095	2.92e-10	1	rs9356920
4	5	1	6:24038537:A:G	rs71555121	6	24038537	1.199e-146	1	rs71555121
4	6	1	6:24147572:A:G	rs3178	6	24147572	1.438e-11	1	rs3178
4	7	1	6:24163814:A:G	rs61528653	6	24163814	4.702e-09	1	rs61528653
4	8	1	6:24169966:A:C	rs148847524	6	24169966	8.173e-290	2	rs148847524;rs12196541
4	9	1	6:24391075:A:G	rs793676	6	24391075	2.686e-20	1	rs793676
4	10	1	6:24429249:C:T	rs6942189	6	24429249	2.767e-24	6	rs6942189;rs6456614;rs2793444;rs760904;rs807518;rs793664
4	11	1	6:24502123:A:G	rs9467203	6	24502123	2.977e-18	3	rs9467203;rs79232381;rs2817244
4	12	1	6:24549315:C:T	rs12197384	6	24549315	1.114e-11	3	rs12197384;rs139126471;rs138191414
4	13	1	6:24585547:A:G	rs2760135	6	24585547	8.286e-20	4	rs2760135;rs3181238;rs7765052;rs9393585
4	14	1	6:24611493:A:G	rs7771169	6	24611493	5.684e-25	5	rs7771169;rs139126471;rs148672910;rs138191414;rs6902039
4	15	1	6:24770723:G:T	rs118125535	6	24770723	7.056e-108	4	rs118125535;rs9366581;rs3813680;rs2754772
4	16	1	6:24775181:G:T	rs2754775	6	24775181	1.522e-18	2	rs2754775;rs9366581
4	17	1	6:24818194:C:T	rs61528548	6	24818194	1.311e-28	3	rs61528548;rs56733961;rs9366581
4	18	1	6:24902113:A:G	rs2817726	6	24902113	1.187e-61	3	rs2817726;rs4431425;rs6930916
4	19	1	6:24923930:A:C	rs430661	6	24923930	4.271e-32	3	rs430661;rs1739316;rs6930916
4	20	1	6:24951199:A:G	rs647297	6	24951199	7.284e-203	1	rs647297
4	21	1	6:24951809:A:G	rs387628	6	24951809	7.511e-30	1	rs387628
4	22	1	6:25028200:A:C	rs9356958	6	25028200	2.327e-16	1	rs9356958
4	23	1	6:25122737:A:G	rs302971	6	25122737	8.294e-26	1	rs302971
4	24	1	6:25141684:C:T	rs12198209	6	25141684	1.236e-43	3	rs12198209;rs12529629;rs9356960
4	25	1	6:25180191:A:G	rs5008131	6	25180191	1.718e-121	5	rs5008131;rs9467438;rs9356969;rs9393632;rs9467434
4	26	1	6:25239716:A:C	rs9379740	6	25239716	7.892e-79	7	rs9379740;rs9379740;rs9393632;rs2690123;rs9393632;rs9467438;rs9379740
4	27	1	6:25336424:C:G	rs11754685	6	25336424	1.585e-62	4	rs11754685;rs4712922;rs1927695;rs9393632
4	28	1	6:25338021:G:T	rs2744227	6	25338021	2.221e-33	4	rs2744227;rs4712922;rs73387233;rs2690112
4	29	1	6:25350791:A:G	rs139581790	6	25350791	8.911e-54	5	rs139581790;rs115113140;rs138191414;rs139126471;rs148672910
4	30	1	6:25364735:C:T	rs76282978	6	25364735	1.094e-16	4	rs76282978;rs3757136;rs138093034;rs144350646
4	31	1	6:25379926:C:T	rs4711082	6	25379926	1.133e-89	5	rs4711082;rs13214013;rs2690123;rs2744306;rs4712922
4	32	1	6:25410162:A:G	rs77551782	6	25410162	4.747e-257	3	rs77551782;rs927986;rs1927695
4	33	1	6:25446283:A:G	rs62392388	6	25446283	1.633e-124	5	rs62392388;rs1927693;rs11752825;rs12213948;rs7761140
4	34	1	6:25473413:A:G	rs384340	6	25473413	2.116e-73	3	rs384340;rs301394;rs12525553
4	35	1	6:25527262:C:T	rs118136993	6	25527262	7.803e-10	3	rs118136993;rs12207674;rs932316
4	36	1	6:25589592:A:G	rs7767930	6	25589592	1.003e-144	8	rs7767930;rs932316;rs13217586;rs6934330;rs301394;rs374087;rs12525553;rs12207674
4	37	1	6:25684405:C:T	rs4711092	6	25684405	1.109e-65	1	rs4711092
4	38	1	6:25719210:C:T	rs9358870	6	25719210	1.481e-19	5	rs9358870;rs7754944;rs116956053;rs717551;rs72834629
4	39	1	6:25928376:G:T	rs9295676	6	25928376	3.967e-117	5	rs9295676;rs12210098;rs3752418;rs7754944;rs4573076
4	40	1	6:26107463:A:G	rs198846	6	26107463	2.766e-13	4	rs198846;rs6456691;rs72830103;rs12210098
4	41	1	6:26151535:G:T	rs9358908	6	26151535	8.488e-308	7	rs9358908;rs80292109;rs9348708;rs7754944;rs4573076;rs72834629;rs3752418
4	42	1	6:26205770:A:C	rs9393687	6	26205770	3.172e-11	1	rs9393687
4	43	1	6:26259748:A:G	rs806786	6	26259748	9.896e-94	4	rs806786;rs9348708;rs3757136;rs80292109
4	44	1	6:26316035:C:T	rs60122474	6	26316035	1.186e-08	3	rs60122474;rs9348708;rs113507773
4	45	1	6:26340872:A:G	rs55964643	6	26340872	4.3e-08	3	rs55964643;rs80292109;rs9348708
4	46	1	6:26398664:A:G	rs12201802	6	26398664	6.4e-14	3	rs12201802;rs12202438;rs10946899
4	47	1	6:26455811:C:T	rs9295689	6	26455811	1.624e-236	6	rs9295689;rs11755443;rs1102565;rs2092114;rs9348762;rs2073526
4	48	1	6:26557121:C:G	rs9467788	6	26557121	3.402e-85	6	rs9467788;rs2754597;rs1102565;rs9348762;rs12207674;rs115113140
4	49	1	6:26880157:C:T	rs3999347	6	26880157	4.205e-10	2	rs3999347;rs11755443
4	50	1	6:27287800:C:T	rs12174489	6	27287800	8.233e-59	3	rs12174489;rs2092114;rs149260225
4	51	1	6:27357671:A:G	rs71559025	6	27357671	1.033e-168	13	rs71559025;rs74328437;rs2294480;rs149878;rs73396550;rs1150691;rs1233666;rs1416920;rs11755443;rs1102565;rs2092114;rs9348762;rs149260225
4	52	1	6:27668510:A:G	rs151289341	6	27668510	2.717e-99	4	rs151289341;rs189743278;rs3864294;rs2754597
4	53	1	6:28010078:C:G	rs169431	6	28010078	3.993e-308	7	rs169431;rs73396550;rs1150678;rs9468371;rs149878;rs9368537;rs184084677
4	54	1	6:28015355:A:G	rs7739987	6	28015355	8.335e-97	11	rs7739987;rs73396550;rs1150678;rs1233666;rs2235359;rs6939576;rs80355632;rs1102565;rs2092114;rs9348762;rs140366348
4	55	1	6:28516725:A:G	rs79848291	6	28516725	1.685e-18	5	rs79848291;rs6939576;rs77514138;rs2235359;rs392230
4	56	1	6:28636927:A:G	rs79327542	6	28636927	5.856e-16	5	rs79327542;rs9393927;rs12055619;rs150971595;rs9468371
4	57	1	6:28647722:C:T	rs117585327	6	28647722	5.002e-11	2	rs117585327;rs117846312
4	58	1	6:28677498:A:G	rs139675877	6	28677498	4.893e-10	1	rs139675877
4	59	1	6:28686284:C:T	rs2394152	6	28686284	9.709e-251	14	rs2394152;rs1233595;rs209180;rs12055619;rs9283885;rs1884123;rs35095140;rs1419640;rs1233666;rs1416920;rs9468371;rs392230;rs6939576;rs9393927
4	60	1	6:28712322:A:G	rs139728037	6	28712322	5.268e-10	2	rs139728037;rs117847335
4	61	1	6:28742331:C:T	rs79128439	6	28742331	4.604e-14	7	rs79128439;rs41316602;rs77514138;rs9468500;rs115175926;rs6939576;rs1233595
4	62	1	6:28873161:A:C	rs72853516	6	28873161	5.877e-13	8	rs72853516;rs117847335;rs9283885;rs3129172;rs9257696;rs12206581;rs1233595;rs209180
4	63	1	6:29148197:C:T	rs182567634	6	29148197	4.809e-23	4	rs182567634;rs9468500;rs115175926;rs3864294
4	64	1	6:29208905:A:C	rs191506311	6	29208905	7.489e-24	3	rs191506311;rs16894983;rs29263
4	65	1	6:29229480:A:G	6:29229480	6	29229480	5.928e-24	2	6:29229480;6:28940186
4	66	1	6:29252758:A:T	rs116466121	6	29252758	1.2e-39	12	rs116466121;rs1884123;rs7754926;rs9257802;rs1419639;rs36004744;rs115175926;rs151001546;rs80067717;rs28381664;rs9283885;rs9468500
4	67	1	6:29337075:G:T	rs3930883	6	29337075	4.06e-206	9	rs3930883;rs9257802;rs1419642;rs12206581;rs209180;rs9283885;rs3129172;rs1884123;rs9257696
4	68	1	6:29400236:C:G	rs9257858	6	29400236	9.06e-38	9	rs9257858;rs9257887;rs1233417;rs362530;rs12206581;rs9468500;rs9257696;rs117680413;rs115175926
4	69	1	6:29434295:C:T	rs2107191	6	29434295	7.483E-310	9	rs2107191;rs734962;rs9257887;rs2745401;rs1233417;rs362530;rs36004744;rs3094562;rs1419642
4	70	1	6:29555585:A:G	rs17184367	6	29555585	5.121e-130	6	rs17184367;rs9468561;rs150971595;rs1233372;rs362525;rs1233388
4	71	1	6:29576393:A:G	rs29230	6	29576393	7.127e-70	11	rs29230;rs29263;rs9468561;rs9461540;rs115175926;rs151001546;rs16894983;rs2745401;rs41317798;rs362529;rs1233388
4	72	1	6:29603136:A:C	rs3095270	6	29603136	3.148e-276	4	rs3095270;rs1233372;rs1233388;rs9468561
4	73	1	6:29606761:A:G	rs3095268	6	29606761	8.519e-18	2	rs3095268;rs362525
4	74	1	6:29606794:C:T	rs3131857	6	29606794	1.026e-285	11	rs3131857;rs1233372;rs7774576;rs3864294;rs80355632;rs9468500;rs115175926;rs6907104;rs387659;rs362530;rs29243
4	75	2	6:33188495:A:G	rs6914404	6	33188495	8.014e-221	2	rs6914404;rs211468
4	76	2	6:33232025:C:T	rs460568	6	33232025	4.829e-12	3	rs460568;rs15604;rs1800837
4	77	2	6:33285498:C:T	rs184714444	6	33285498	2.407e-50	7	rs184714444;rs67136908;rs538693715;rs210159;rs10807127;rs140007014;rs9277947
4	78	2	6:33360973:A:G	rs140671946	6	33360973	2.747e-09	2	rs140671946;rs140814057
4	79	2	6:33452886:A:G	rs9380361	6	33452886	2.505e-291	3	rs9380361;rs210199;rs211468
4	80	2	6:33492839:A:G	rs72880049	6	33492839	3.376e-230	7	rs72880049;rs210199;rs210152;rs210164;rs35020498;rs9469532;rs211468
4	81	2	6:33516644:C:T	rs9461875	6	33516644	9.073e-14	3	rs9461875;rs13203795;rs210199
4	82	2	6:33575690:C:T	rs114770469	6	33575690	1.33e-17	2	rs114770469;rs9469532
4	83	2	6:33620397:C:G	rs1830873	6	33620397	9.561e-277	5	rs1830873;rs942639;rs138965061;rs13203795;rs9394159
4	84	2	6:33638657:A:G	rs2274198	6	33638657	3.374e-158	4	rs2274198;rs942639;rs9469532;rs9394159
4	85	2	6:33695130:A:G	rs2281830	6	33695130	1.371e-255	9	rs2281830;rs756137;rs9461911;rs112733238;rs2209345;rs9368779;rs9469532;rs9394159;rs942636
4	86	2	6:33734333:A:G	rs74622024	6	33734333	4.686e-14	3	rs74622024;rs78531919;rs117270633
4	87	2	6:33747343:A:G	rs111441255	6	33747343	4.105e-08	1	rs111441255
4	88	2	6:33818001:A:G	rs4711356	6	33818001	6.041e-23	4	rs4711356;rs117270633;rs78531919;rs9461911
4	89	2	6:33819582:A:G	rs11753213	6	33819582	1.812e-47	1	rs11753213
4	90	2	6:33841785:A:G	rs1853656	6	33841785	4.43e-113	3	rs1853656;rs12211048;rs2104362
4	91	2	6:33847919:A:C	rs6912350	6	33847919	1.032e-119	2	rs6912350;rs3823428
4	92	2	6:33863662:A:G	rs1998630	6	33863662	1.253e-65	2	rs1998630;rs3823428
4	93	2	6:33864998:A:G	rs3800341	6	33864998	4.066e-25	2	rs3800341;rs4713719
4	94	2	6:33869806:A:G	rs9296102	6	33869806	1.733e-66	4	rs9296102;rs4713719;rs2499761;rs9368784
4	95	2	6:33872257:C:T	rs9394179	6	33872257	2.145e-216	4	rs9394179;rs2499761;rs9368784;rs2477239
4	96	2	6:33879800:A:G	rs4711366	6	33879800	1.511e-187	3	rs4711366;rs2499768;rs2477239
4	97	2	6:33902653:C:T	rs6457749	6	33902653	6.158e-47	3	rs6457749;rs6939337;rs2499768
4	98	2	6:33904869:A:T	rs12204020	6	33904869	9.511e-10	1	rs12204020
4	99	2	6:33933481:A:G	rs62399336	6	33933481	2.396e-120	3	rs62399336;rs2499743;rs2495968
4	100	2	6:33951866:C:T	rs77732451	6	33951866	2.353e-08	1	rs77732451
4	101	2	6:33956472:C:T	rs4256433	6	33956472	4.681e-79	3	rs4256433;rs2499766;rs2495986
4	102	2	6:33963009:C:G	rs2495994	6	33963009	1.337e-42	2	rs2495994;rs2495996
4	103	2	6:34029204:C:T	rs2451361	6	34029204	4.301e-53	5	rs2451361;rs7763695;rs2495996;rs2495999;rs2229900
4	104	2	6:34040401:A:G	rs200824858	6	34040401	2.66e-276	4	rs200824858;rs34191868;rs9469711;rs9469702
4	105	2	6:34084862:A:C	rs4713740	6	34084862	1.297e-61	6	rs4713740;rs7756506;rs13210489;rs9469702;rs9368792;rs9469711
4	106	2	6:34091702:C:T	rs6913755	6	34091702	5.709e-16	3	rs6913755;rs9469711;rs7763695
4	107	2	6:34113037:C:G	rs563704938	6	34113037	1.659e-12	3	rs563704938;rs1150781;rs62398681
4	108	2	6:34139058:A:C	rs4711383	6	34139058	1.244e-08	4	rs4711383;rs1150781;rs117885712;rs13210489
4	109	2	6:34174662:C:T	rs1759639	6	34174662	3.467e-41	3	rs1759639;rs1150781;rs9357175
4	110	2	6:34303485:A:G	rs78315810	6	34303485	5.885e-53	2	rs78315810;rs9357175
4	111	2	6:34434715:A:C	rs9296115	6	34434715	1.688e-40	2	rs9296115;rs62398681
4	112	2	6:34439453:A:G	rs145371853	6	34439453	5.506e-23	5	rs145371853;rs3800397;rs210159;rs10807127;rs140007014
4	113	2	6:34448315:C:T	rs3846867	6	34448315	3.904e-42	3	rs3846867;rs4713808;rs73746675
4	114	2	6:34519547:C:G	rs3778070	6	34519547	2.1e-46	4	rs3778070;rs3798543;rs6940215;rs4713808
4	115	2	6:34545999:A:C	rs205270	6	34545999	2.087e-24	2	rs205270;rs3798543
4	116	2	6:35072680:A:G	rs73745097	6	35072680	2.22e-100	6	rs73745097;rs2762346;rs3777748;rs9469972;rs2814980;rs3800430
4	117	2	6:35246319:A:G	rs10484578	6	35246319	4.443e-43	9	rs10484578;rs2206030;rs11755391;rs1051952;rs6457793;rs3800430;rs2762346;rs732594;rs9469972
4	118	2	6:35386872:C:T	rs36018387	6	35386872	9.981e-10	2	rs36018387;rs62398681
4	119	2	6:35439393:G:T	rs4711416	6	35439393	3.591e-130	3	rs4711416;rs2076170;rs9469972
4	120	2	6:35463055:A:T	rs10947552	6	35463055	1.206e-152	4	rs10947552;rs1051952;rs7738710;rs9368873
4	121	2	6:35501948:A:G	rs138807262	6	35501948	2.534e-16	2	rs138807262;rs3800397
4	122	2	6:35519420:A:T	rs79695331	6	35519420	1.018e-48	5	rs79695331;rs112246428;rs1051952;rs7738710;rs12181820
4	123	2	6:35723923:C:T	rs2817044	6	35723923	5.271e-42	4	rs2817044;rs2817045;rs1343796;rs9462110
4	124	2	6:35741677:C:T	rs2766575	6	35741677	4.416e-20	5	rs2766575;rs2766585;rs2817012;rs35868461;rs2817045
4	125	2	6:35895153:C:T	rs76985948	6	35895153	1.825e-44	5	rs76985948;rs10755688;rs9357207;rs9462110;rs2817012
4	126	2	6:36147672:C:G	rs9368908	6	36147672	1.418e-33	5	rs9368908;rs9470238;rs10755688;rs9357207;rs2071863
4	127	2	6:36269725:A:G	rs34598813	6	36269725	1.764e-11	1	rs34598813
4	128	2	6:36318575:C:T	rs2269563	6	36318575	1.213e-09	1	rs2269563
4	129	2	6:36342181:C:T	rs6457907	6	36342181	2.012e-34	2	rs6457907;rs4713959
4	130	2	6:36380644:C:T	rs6457915	6	36380644	8.212e-19	3	rs6457915;rs11757842;rs7776298
4	131	2	6:36620499:C:G	rs10947616	6	36620499	2.094e-14	2	rs10947616;rs1059234
4	132	2	6:36745540:C:G	rs144332307	6	36745540	4.825e-11	1	rs144332307
4	133	2	6:36769856:A:G	rs143720534	6	36769856	1.871e-56	1	rs143720534
4	134	2	6:36807161:C:T	rs183702303	6	36807161	3.173e-65	1	rs183702303
4	135	2	6:36948082:C:T	rs77389060	6	36948082	1.106e-35	1	rs77389060
4	136	2	6:36968063:A:T	rs16889370	6	36968063	1.73e-10	3	rs16889370;rs3176328;rs10947652
4	137	2	6:37144404:A:G	rs262929	6	37144404	1.846e-11	1	rs262929
4	138	3	6:39047303:G:T	rs10305494	6	39047303	1.576e-10	1	rs10305494
4	139	4	11:45730520:A:C	rs192387104	11	45730520	6.571e-09	1	rs192387104
4	140	5	11:47462176:A:G	rs78559029	11	47462176	2.907e-14	2	rs78559029;rs75874665
4	141	5	11:47589106:A:C	rs118011483	11	47589106	4.008e-09	3	rs118011483;rs7130402;rs150859661
4	142	5	11:48346996:A:G	rs12794960	11	48346996	1.444e-58	5	rs12794960;rs150859661;rs36067143;rs75874665;rs7130402
4	143	5	11:49855741:A:C	rs12807804	11	49855741	7.373e-83	3	rs12807804;rs4929891;rs36067143
4	144	6	11:55021897:C:T	rs376978232	11	55021897	1.285e-72	4	rs376978232;rs476822;rs10897182;rs28681529
4	145	6	11:56306773:A:C	rs9651721	11	56306773	7.251e-50	8	rs9651721;rs1943637;rs1938746;rs17640952;rs118113160;rs75419177;rs10897182;rs28681529
4	146	6	11:56573675:A:G	rs141394107	11	56573675	1.304e-21	2	rs141394107;rs118113160
4	147	6	11:56788423:A:G	rs138238752	11	56788423	1.147e-13	1	rs138238752
2	256	1	6:28464927:A:T	rs183719819	6	28464927	9.911e-29	18	4
2	257	1	6:28482692:G:T	rs34077080	6	28482692	1.263e-20	37	11
2	258	1	6:28500911:A:C	rs571726149	6	28500911	1.97e-20	1	1
2	259	1	6:28504639:A:G	rs392230	6	28504639	1.261e-180	97	4
2	260	1	6:28520351:C:T	rs148900334	6	28520351	6.897e-09	5	3
2	261	1	6:28557129:A:G	rs73740747	6	28557129	2.605e-117	13	3
2	262	1	6:28613079:A:T	rs139614182	6	28613079	4.23e-19	27	6
2	263	1	6:28618751:A:G	rs1884936	6	28618751	3.162e-55	76	2
2	264	1	6:28632345:A:G	rs151327481	6	28632345	5.496e-12	23	13
2	265	1	6:28636927:A:G	rs79327542	6	28636927	2.22e-26	11	7
2	266	1	6:28647722:C:T	rs117585327	6	28647722	8.633e-22	2	1
2	267	1	6:28669315:A:G	rs6939576	6	28669315	9.023e-23	1	1
2	268	1	6:28669610:A:G	rs143144207	6	28669610	1.016e-91	1	1
2	269	1	6:28677498:A:G	rs139675877	6	28677498	7.856e-31	2	1
2	270	1	6:28686284:C:T	rs2394152	6	28686284	2.293e-306	361	5
2	271	1	6:28710748:A:G	rs141661096	6	28710748	7.565e-09	9	2
2	272	1	6:28712322:A:G	rs139728037	6	28712322	1.607e-13	3	3
2	273	1	6:28713434:C:T	6:28713434	6	28713434	3.013e-20	14	3
2	274	1	6:28727593:A:T	rs1233595	6	28727593	1.102e-17	18	2
2	275	1	6:28754817:A:C	rs9257182	6	28754817	7.317e-208	166	4
2	276	1	6:28792220:G:T	rs41316602	6	28792220	2.375e-160	10	3
2	277	1	6:28804189:C:T	rs117257140	6	28804189	5.541e-10	10	4
2	278	1	6:28853987:C:G	rs139494877	6	28853987	7.273e-12	26	8
2	279	1	6:28867213:C:T	rs142445164	6	28867213	1.037e-09	15	6
2	280	1	6:28868091:C:G	rs139791445	6	28868091	1.214e-08	21	13
2	281	1	6:28875959:A:G	rs117846312	6	28875959	3.394e-17	5	1
2	282	1	6:28894614:C:T	rs41316618	6	28894614	9.266e-33	177	10
2	283	1	6:28897214:A:G	rs876737	6	28897214	2.704e-166	202	6
2	284	1	6:28916810:C:T	rs117847335	6	28916810	1.589e-09	2	2
2	285	1	6:28919625:A:G	rs7745220	6	28919625	6.293e-52	246	11
2	286	1	6:28939117:C:T	rs12055619	6	28939117	3.746e-29	9	5
2	287	1	6:28940186:A:C	6:28940186	6	28940186	5.508e-53	2	1
2	288	1	6:28959475:C:T	rs148672491	6	28959475	7.437e-14	13	1
2	289	1	6:28985428:A:G	rs190461360	6	28985428	3.916e-53	23	8
2	290	1	6:29028646:C:T	rs138059097	6	29028646	4.657e-08	5	2
2	291	1	6:29034882:A:C	rs4599679	6	29034882	1.331e-229	44	9
2	292	1	6:29034979:G:T	rs146663041	6	29034979	2.36e-174	237	20
2	293	1	6:29097247:A:G	rs9283885	6	29097247	3.537e-86	50	4
2	294	1	6:29099920:A:G	rs142242329	6	29099920	1.065e-09	17	9
2	295	1	6:29162833:A:G	rs3828924	6	29162833	3.251e-168	265	5
2	296	1	6:29210596:G:T	rs3117340	6	29210596	2.064e-199	239	3
2	297	1	6:29219691:C:T	rs146609822	6	29219691	2.544e-12	5	4
2	298	1	6:29229480:A:G	6:29229480	6	29229480	8.375e-53	2	1
2	299	1	6:29269066:A:G	rs7754926	6	29269066	3.626e-40	208	7
2	300	1	6:29289929:C:T	rs146185592	6	29289929	1.812e-12	4	1
2	301	1	6:29335080:A:C	rs148472353	6	29335080	4.18e-09	9	1
2	302	1	6:29337075:G:T	rs3930883	6	29337075	6.639e-155	4	1
2	303	1	6:29355494:A:C	rs1419639	6	29355494	5.313e-40	1	1
2	304	1	6:29361707:G:T	rs16894836	6	29361707	4.95e-72	26	5
2	305	1	6:29379734:C:T	rs117680413	6	29379734	2.572e-20	1	1
2	306	1	6:29389528:C:T	rs151001546	6	29389528	1.417e-18	10	1
2	307	1	6:29396874:C:T	rs3128851	6	29396874	5.663e-294	8	2
2	308	1	6:29397521:A:T	rs7349908	6	29397521	5.043e-218	34	1
2	309	1	6:29427068:A:G	rs59818916	6	29427068	9.99e-18	5	2
2	310	1	6:29436911:C:T	rs116973845	6	29436911	2.493e-13	2	2
2	311	1	6:29441502:A:G	rs117137251	6	29441502	1.371e-09	2	2
2	312	1	6:29442975:A:C	rs77454196	6	29442975	5.201e-24	4	1
2	313	1	6:29468710:C:T	rs16894983	6	29468710	1.9e-56	5	2
2	314	1	6:29487535:A:G	rs9468541	6	29487535	3.723e-33	11	4
2	315	1	6:29494457:A:C	rs141025794	6	29494457	1.625e-11	2	2
2	316	1	6:29514923:A:G	rs41317798	6	29514923	6.007e-31	4	1
2	317	1	6:29519173:C:T	rs17351888	6	29519173	3.001e-102	52	12
2	318	1	6:29530868:C:T	rs362529	6	29530868	4.204e-79	1	1
2	319	1	6:29538403:C:G	rs1003582	6	29538403	5.325e-115	8	2
2	320	1	6:29543646:G:T	rs362525	6	29543646	1.081e-231	8	1
2	321	1	6:29544010:A:C	rs117181567	6	29544010	2.252e-20	5	1
2	322	1	6:29571609:G:T	rs10946999	6	29571609	6.641e-144	8	1
2	323	1	6:29576590:A:G	rs29263	6	29576590	1.717e-61	102	2
2	324	1	6:29582645:C:T	rs74294678	6	29582645	4.181e-186	68	12
2	325	1	6:29600361:C:T	rs150971595	6	29600361	1.28e-24	4	2
2	326	1	6:29602881:A:G	6:29602881	6	29602881	2.788e-08	8	1
2	327	1	6:29604264:G:T	rs9461540	6	29604264	1.121e-67	4	1
2	328	1	6:29606761:A:G	rs3095268	6	29606761	4.364e-40	1	1
2	329	1	6:29614627:C:G	rs7774576	6	29614627	6.619e-54	5	1
2	330	2	6:33197571:C:T	rs9277947	6	33197571	1.764e-87	3	1
2	331	2	6:33222194:A:G	6:33222194	6	33222194	2.525e-14	2	1
2	332	2	6:33232025:C:T	rs460568	6	33232025	1.209e-09	20	1
2	333	2	6:33270050:A:G	rs140814057	6	33270050	1.589e-15	2	1
2	334	2	6:33285498:C:T	rs184714444	6	33285498	1.256e-85	10	1
2	335	2	6:33306235:C:T	rs9277988	6	33306235	2.098e-10	13	2
2	336	2	6:33308499:A:G	rs187984126	6	33308499	4.708e-83	37	2
2	337	2	6:33319815:A:G	rs9278004	6	33319815	9.737e-09	4	1
2	338	2	6:33321530:A:G	rs139269700	6	33321530	6.871e-10	3	1
2	339	2	6:33325355:A:G	rs551528195	6	33325355	5.879e-12	2	1
2	340	2	6:33337088:C:T	rs67136908	6	33337088	1.853e-83	5	1
2	341	2	6:33351451:A:T	rs114972028	6	33351451	2.581e-79	1	1
2	342	2	6:33360973:A:G	rs140671946	6	33360973	4.085e-13	9	4
2	343	2	6:33382955:C:G	rs116199362	6	33382955	1.497e-10	1	1
2	344	2	6:33385953:A:G	rs1705003	6	33385953	1.01e-08	3	1
2	345	2	6:33388894:C:G	rs114993678	6	33388894	7.734e-80	14	2
2	346	2	6:33408918:A:G	rs538693715	6	33408918	6.647e-80	4	1
2	347	2	6:33443967:A:C	rs576432906	6	33443967	5.143e-10	2	1
2	348	2	6:33450637:C:T	rs28795133	6	33450637	1.504e-13	9	1
2	349	2	6:33461784:A:G	rs34838160	6	33461784	2.841e-85	5	1
2	350	2	6:33467084:A:C	rs12526020	6	33467084	1.553e-12	3	2
2	351	2	6:33480435:A:G	rs86715	6	33480435	5.629e-165	1	1
2	352	2	6:33492839:A:G	rs72880049	6	33492839	2.551e-303	4	1
2	353	2	6:33509023:A:C	rs210199	6	33509023	2.371e-306	20	3
2	354	2	6:33515520:A:G	rs210152	6	33515520	3.284e-45	5	1
2	355	2	6:33516644:C:T	rs9461875	6	33516644	1.736e-22	183	1
2	356	2	6:33519603:C:G	rs210159	6	33519603	3.258e-82	25	2
2	357	2	6:33523576:A:G	rs117184686	6	33523576	1.672e-10	2	2
2	358	2	6:33528281:C:T	rs138892259	6	33528281	2.618e-78	19	1
2	359	2	6:33558301:A:G	rs138612476	6	33558301	2.047e-12	1	1
2	360	2	6:33558915:C:T	rs386906	6	33558915	1.308e-83	5	1
2	361	2	6:33571302:A:T	rs35020498	6	33571302	1.135e-103	31	2
2	362	2	6:33575690:C:T	rs114770469	6	33575690	3.584e-25	12	2
2	363	2	6:33577487:A:T	rs141400340	6	33577487	4.39e-10	2	1
2	364	2	6:33579216:A:G	rs407415	6	33579216	2.638e-276	15	1
2	365	2	6:33581150:C:T	rs138965061	6	33581150	7.494e-16	7	1
2	366	2	6:33583732:A:G	rs13203795	6	33583732	4.989e-28	16	1
2	367	2	6:33584639:A:G	rs6924010	6	33584639	4.902e-101	39	1
2	368	2	6:33589032:C:G	rs6910386	6	33589032	4.794e-77	1	1
2	369	2	6:33605341:A:G	rs139811108	6	33605341	1.886e-11	1	1
2	370	2	6:33606429:C:T	rs75359196	6	33606429	3.094e-13	2	1
2	371	2	6:33607103:A:T	rs150273297	6	33607103	3.094e-154	14	1
2	372	2	6:33609435:C:G	rs149728929	6	33609435	9.829e-14	1	1
2	373	2	6:33618162:A:T	rs9394159	6	33618162	2.399e-272	12	1
2	374	2	6:33619442:A:G	rs10807127	6	33619442	1.97e-75	20	1
2	375	2	6:33620397:C:G	rs1830873	6	33620397	5.532e-226	3	1
2	376	2	6:33626042:C:T	rs73408232	6	33626042	4.693e-69	3	1
2	377	2	6:33632073:C:T	rs144156751	6	33632073	1.316e-10	1	1
2	378	2	6:33642593:A:G	rs942639	6	33642593	4.484e-40	17	1
2	379	2	6:33645457:C:G	rs9469552	6	33645457	1.072e-101	6	1
2	380	2	6:33648144:C:T	rs11967839	6	33648144	9.135e-13	5	1
2	381	2	6:33667965:G:T	rs594223	6	33667965	3.731e-12	3	1
2	382	2	6:33700838:C:T	rs117270633	6	33700838	2.489e-26	3	2
2	383	2	6:33710696:C:T	rs9348925	6	33710696	5.07e-123	83	1
2	384	2	6:33722821:A:G	rs145847433	6	33722821	2.072e-09	7	4
2	385	2	6:33734333:A:G	rs74622024	6	33734333	1.638e-17	1	1
2	386	2	6:33734793:A:G	rs943469	6	33734793	2.732e-77	3	1
2	387	2	6:33747343:A:G	rs111441255	6	33747343	1.146e-11	27	3
2	388	2	6:33772963:C:T	rs3763254	6	33772963	6.512e-10	34	1
2	389	2	6:33788637:C:G	rs9368777	6	33788637	1.232e-144	3	1
2	390	2	6:33789202:C:T	rs73747323	6	33789202	7.009e-09	16	1
2	391	2	6:33792595:A:G	rs78531919	6	33792595	4.282e-33	16	1
2	392	2	6:33797628:A:C	rs112733238	6	33797628	3.769e-77	2	1
2	393	2	6:33799632:C:G	rs9461918	6	33799632	5.159e-59	4	1
2	394	2	6:33804137:C:T	rs7761859	6	33804137	1.397e-236	16	2
2	395	2	6:33815924:A:G	rs2209345	6	33815924	3.606e-23	36	1
2	396	2	6:33818001:A:G	rs4711356	6	33818001	1.203e-26	32	1
2	397	2	6:33818725:A:G	rs183661661	6	33818725	4.494e-10	1	1
2	398	2	6:33819582:A:G	rs11753213	6	33819582	1.144e-110	1	1
2	399	2	6:33825358:A:G	rs2104362	6	33825358	9.97e-285	13	1
2	400	2	6:33832916:A:G	rs3998108	6	33832916	1.209e-120	4	1
2	401	2	6:33838727:C:T	rs62397636	6	33838727	3.245e-60	6	1
2	402	2	6:33841785:A:G	rs1853656	6	33841785	5.867e-244	1	1
2	403	2	6:33842877:A:G	rs12211048	6	33842877	3.569e-177	1	1
2	404	2	6:33846143:C:T	rs4713711	6	33846143	6.558e-132	3	1
2	405	2	6:33847919:A:C	rs6912350	6	33847919	9.206e-254	11	1
2	406	2	6:33862855:C:G	rs3823428	6	33862855	1.179e-40	11	1
2	407	2	6:33863662:A:G	rs1998630	6	33863662	7.815e-130	1	1
2	408	2	6:33864354:A:G	rs7741871	6	33864354	6.196e-111	1	1
2	409	2	6:33864998:A:G	rs3800341	6	33864998	8.459e-67	1	1
2	410	2	6:33872257:C:T	rs9394179	6	33872257	1.447e-74	2	1
2	411	2	6:33872561:A:G	rs4713719	6	33872561	5.031e-296	1	1
2	412	2	6:33879800:A:G	rs4711366	6	33879800	1.196e-112	1	1
2	413	2	6:33881804:C:T	rs79756150	6	33881804	5.217e-11	3	2
2	414	2	6:33889404:A:G	rs2499761	6	33889404	6.127e-243	15	1
2	415	2	6:33890342:A:T	rs2499768	6	33890342	3.239e-166	2	2
2	416	2	6:33895001:G:T	rs9368784	6	33895001	2.189e-14	13	1
2	417	2	6:33900681:C:T	rs1324578	6	33900681	6.288e-67	11	1
2	418	2	6:33901255:C:T	rs2477239	6	33901255	5.72e-168	1	1
2	419	2	6:33902653:C:T	rs6457749	6	33902653	3.054e-106	1	1
2	420	2	6:33903529:A:G	rs6939337	6	33903529	2.42e-41	1	1
2	421	2	6:33904769:A:C	rs7740698	6	33904769	1.16e-08	24	2
2	422	2	6:33904869:A:T	rs12204020	6	33904869	1.697e-12	1	1
2	423	2	6:33916313:A:C	rs2499743	6	33916313	6.823e-46	1	1
2	424	2	6:33926102:G:T	rs2495968	6	33926102	3.754e-110	23	2
2	425	2	6:33933481:A:G	rs62399336	6	33933481	1.862e-124	5	1
2	426	2	6:33936925:A:G	rs7755524	6	33936925	1.053e-39	7	1
2	427	2	6:33951866:C:T	rs77732451	6	33951866	1.054e-09	1	1
2	428	2	6:33952531:A:G	rs140007014	6	33952531	2.716e-43	19	7
2	429	2	6:33953646:C:T	rs2499766	6	33953646	1.364e-131	1	1
2	430	2	6:33953809:A:G	rs2495986	6	33953809	1.702e-20	6	1
2	431	2	6:33956472:C:T	rs4256433	6	33956472	5.083e-141	2	1
2	432	2	6:33963009:C:G	rs2495994	6	33963009	8.462e-150	2	1
2	433	2	6:33972174:C:T	rs2495996	6	33972174	4.251e-143	5	2
2	434	2	6:33979979:C:G	rs2495999	6	33979979	1.056e-25	18	1
2	435	2	6:33982527:C:T	rs79266576	6	33982527	3.223e-15	1	1
2	436	2	6:34006413:A:G	rs75635731	6	34006413	7.908e-11	17	2
2	437	2	6:34008006:A:G	rs2229900	6	34008006	1.748e-34	32	1
2	438	2	6:34029204:C:T	rs2451361	6	34029204	3.65e-74	6	1
2	439	2	6:34036983:A:G	rs9469702	6	34036983	3.514e-86	4	1
2	440	2	6:34038597:A:G	rs568421342	6	34038597	5.542e-28	1	1
2	441	2	6:34040401:A:G	rs200824858	6	34040401	8.436e-34	43	1
2	442	2	6:34044696:A:T	rs34191868	6	34044696	7.394e-16	10	1
2	443	2	6:34051334:A:G	rs9368792	6	34051334	4.656e-88	8	1
2	444	2	6:34055485:A:C	rs11968206	6	34055485	7.209e-24	1	1
2	445	2	6:34056583:A:G	rs9469711	6	34056583	1.425e-164	2	1
2	446	2	6:34072561:C:T	rs7763695	6	34072561	2.744e-75	5	1
2	447	2	6:34083564:A:G	rs13196449	6	34083564	9.142e-09	5	1
2	448	2	6:34084862:A:C	rs4713740	6	34084862	1.74e-126	46	1
2	449	2	6:34091702:C:T	rs6913755	6	34091702	2.307e-27	37	1
2	450	2	6:34102680:A:C	rs3756925	6	34102680	8.61e-10	1	1
2	451	2	6:34110808:C:G	rs75432840	6	34110808	2e-29	1	1
2	452	2	6:34113984:C:G	rs117885712	6	34113984	1.826e-10	2	1
2	453	2	6:34116700:G:T	rs182291280	6	34116700	6.523e-29	5	2
2	454	2	6:34120333:C:T	rs7756506	6	34120333	3.144e-147	4	1
2	455	2	6:34138960:A:G	rs13210489	6	34138960	2.155e-129	97	1
2	456	2	6:34139058:A:C	rs4711383	6	34139058	4.275e-26	2	1
2	457	2	6:34154652:C:T	rs145223175	6	34154652	6.463e-28	2	1
2	458	2	6:34174662:C:T	rs1759639	6	34174662	2.635e-146	1	1
2	459	2	6:34226337:C:T	rs9357175	6	34226337	3.061e-48	6	1
2	460	2	6:34351767:A:G	rs3778077	6	34351767	9.804e-130	133	3
2	461	2	6:34434715:A:C	rs9296115	6	34434715	6.313e-84	8	1
2	462	2	6:34439453:A:G	rs145371853	6	34439453	1.9e-36	19	8
2	463	2	6:34448315:C:T	rs3846867	6	34448315	6.297e-60	8	1
2	464	2	6:34460416:C:T	rs7454888	6	34460416	1.178e-15	1	1
2	465	2	6:34483015:C:T	rs4713808	6	34483015	1.638e-97	2	1
2	466	2	6:34486139:A:C	rs71567453	6	34486139	3.41e-12	1	1
2	467	2	6:34491013:A:G	rs73746675	6	34491013	1.512e-218	7	1
2	468	2	6:34519547:C:G	rs3778070	6	34519547	3.352e-72	1	1
2	469	2	6:34522572:C:T	rs3798543	6	34522572	1.623e-154	26	1
2	470	2	6:34545999:A:C	rs205270	6	34545999	1.207e-152	8	1
2	471	2	6:34546040:C:G	rs9791348	6	34546040	4.298e-16	89	1
2	472	2	6:34644555:A:C	rs199931645	6	34644555	3.208e-08	4	3
2	473	2	6:34684227:C:T	rs117833645	6	34684227	1.652e-08	1	1
2	474	2	6:34697767:A:G	rs2814953	6	34697767	3.349e-19	314	4
2	475	2	6:34779463:C:G	rs6457793	6	34779463	4.918e-115	13	6
2	476	2	6:34857656:C:T	rs13218101	6	34857656	8.016e-70	66	4
2	477	2	6:34935319:A:T	rs201495468	6	34935319	4.911e-13	244	12
2	478	2	6:34947804:A:G	rs148914899	6	34947804	1.013e-25	4	2
2	479	2	6:35000194:C:T	rs74469408	6	35000194	2.588e-10	5	1
2	480	2	6:35033854:A:G	rs820077	6	35033854	3.601e-10	324	14
2	481	2	6:35039183:C:G	rs149743744	6	35039183	2.701e-25	4	1
2	482	2	6:35044753:G:T	rs6930756	6	35044753	1.963e-70	49	2
2	483	2	6:35072680:A:G	rs73745097	6	35072680	3.933e-41	33	1
2	484	2	6:35078623:C:G	rs2762346	6	35078623	9.238e-110	67	4
2	485	2	6:35107682:A:T	rs3777748	6	35107682	2.234e-23	24	1
2	486	2	6:35160008:A:G	rs3800397	6	35160008	2.022e-34	6	4
2	487	2	6:35173757:A:G	rs3734252	6	35173757	4.793e-08	7	2
2	488	2	6:35198438:C:T	rs117462486	6	35198438	1.157e-10	5	3
2	489	2	6:35206553:A:C	rs732594	6	35206553	1.294e-53	1	1
2	490	2	6:35233369:C:T	rs188106794	6	35233369	8.773e-26	9	3
2	491	2	6:35299507:C:T	rs2395618	6	35299507	3.932e-88	34	4
2	492	2	6:35326326:C:T	rs187472977	6	35326326	8.333e-39	4	1
2	493	2	6:35354116:C:T	rs7763692	6	35354116	2.214e-10	1	1
2	494	2	6:35356143:A:G	rs3777744	6	35356143	3.788e-56	198	2
2	495	2	6:35366619:A:G	rs141220006	6	35366619	9.336e-11	1	1
2	496	2	6:35404354:C:T	rs2206030	6	35404354	1.909e-57	10	1
2	497	2	6:35416759:A:G	rs9470027	6	35416759	5.542e-18	34	1
2	498	2	6:35417327:A:G	rs74292915	6	35417327	5.483e-09	33	1
2	499	2	6:35420967:A:G	rs11755391	6	35420967	4.227e-75	12	1
2	500	2	6:35439393:G:T	rs4711416	6	35439393	3.781e-29	6	1
2	501	2	6:35443573:G:T	rs2076170	6	35443573	3.158e-64	2	1
2	502	2	6:35449326:C:T	rs9394299	6	35449326	1.3e-33	7	1
2	503	2	6:35463055:A:T	rs10947552	6	35463055	5.362e-27	39	1
2	504	2	6:35465786:A:C	rs1051952	6	35465786	1.51e-30	3	1
2	505	2	6:35469647:A:G	rs7738710	6	35469647	1.272e-67	5	1
2	506	2	6:35485647:C:T	rs12181820	6	35485647	2.099e-23	9	1
2	507	2	6:35491503:C:T	rs137907976	6	35491503	3.812e-16	55	1
2	508	2	6:35500433:C:T	rs9368873	6	35500433	1.721e-58	6	1
2	509	2	6:35501948:A:G	rs138807262	6	35501948	9.851e-32	25	9
2	510	2	6:35519420:A:T	rs79695331	6	35519420	2.69e-19	1	1
2	511	2	6:35526032:A:C	rs1984117	6	35526032	1.91e-22	25	3
2	512	2	6:35526262:C:T	rs80105605	6	35526262	7.538e-12	1	1
2	513	2	6:35527716:A:T	rs112246428	6	35527716	9.902e-19	9	1
2	514	2	6:35605503:C:T	rs558815327	6	35605503	6.315e-12	1	1
2	515	2	6:35614026:C:T	rs4713902	6	35614026	2.084e-22	19	1
2	516	2	6:35654872:C:T	rs76193778	6	35654872	2.49e-15	41	4
2	517	2	6:35664252:A:G	rs9380528	6	35664252	6.535e-61	24	3
2	518	2	6:35702048:C:G	rs182141146	6	35702048	1.805e-26	8	1
2	519	2	6:35702887:A:G	rs2817038	6	35702887	9.496e-90	5	1
2	520	2	6:35703876:A:T	rs149712527	6	35703876	1.422e-12	1	1
2	521	2	6:35723923:C:T	rs2817044	6	35723923	3.652e-42	18	2
2	522	2	6:35725138:C:T	rs2817045	6	35725138	1.206e-88	48	1
2	523	2	6:35727590:C:T	rs4713923	6	35727590	2.763e-17	1	1
2	524	2	6:35739341:A:G	rs1343796	6	35739341	2.191e-141	4	1
2	525	2	6:35741677:C:T	rs2766575	6	35741677	3.522e-89	8	1
2	526	2	6:35752459:C:T	rs2766585	6	35752459	5.916e-59	20	1
2	527	2	6:35756082:C:G	rs9462110	6	35756082	9.794e-20	1	1
2	528	2	6:35760403:C:G	rs2817012	6	35760403	1.044e-45	4	1
2	529	2	6:35772722:A:G	rs16881066	6	35772722	6.675e-23	9	4
2	530	2	6:35814325:C:T	rs9470134	6	35814325	8.646e-13	223	5
2	531	2	6:35820544:C:G	rs2395637	6	35820544	4.663e-120	9	3
2	532	2	6:35892438:A:G	rs12210988	6	35892438	2.283e-17	25	4
2	533	2	6:35913124:A:G	rs117903426	6	35913124	1.993e-08	7	1
2	534	2	6:35955833:A:G	rs10755688	6	35955833	4.804e-82	69	1
2	535	2	6:36070227:G:T	rs16884857	6	36070227	2.54e-13	108	1
2	536	2	6:36082616:A:G	rs72657687	6	36082616	1.394e-59	27	3
2	537	2	6:36107172:A:G	rs2071863	6	36107172	3.629e-56	15	1
2	538	2	6:36133453:C:T	rs12201042	6	36133453	9.22e-09	7	1
2	539	2	6:36144958:C:T	rs9394333	6	36144958	1.129e-27	3	1
2	540	2	6:36197284:A:G	rs58321576	6	36197284	1.894e-09	19	1
2	541	2	6:36208311:C:T	rs72657688	6	36208311	2.814e-45	12	2
2	542	2	6:36228600:G:T	rs9470238	6	36228600	1.536e-22	1	1
2	543	2	6:36230135:A:G	rs4713944	6	36230135	1.3e-24	1	1
2	544	2	6:36254854:C:T	rs6457895	6	36254854	1.962e-66	8	1
2	545	2	6:36267519:C:T	rs11754972	6	36267519	6.545e-28	2	1
2	546	2	6:36269725:A:G	rs34598813	6	36269725	2.896e-08	2	1
2	547	2	6:36287312:C:G	rs743852	6	36287312	1.482e-10	1	1
2	548	2	6:36289145:A:C	rs763018	6	36289145	8.026e-35	7	1
2	549	2	6:36306099:A:C	rs4713959	6	36306099	1.63e-31	8	1
2	550	2	6:36318575:C:T	rs2269563	6	36318575	3.114e-25	2	1
2	551	2	6:36322975:A:G	rs11966082	6	36322975	5.294e-27	2	1
2	552	2	6:36336087:A:G	rs744848	6	36336087	3.278e-24	4	1
2	553	2	6:36340040:C:G	rs62403705	6	36340040	3.642e-15	6	1
2	554	2	6:36342181:C:T	rs6457907	6	36342181	2.239e-131	3	1
2	555	2	6:36380644:C:T	rs6457915	6	36380644	7.75e-09	45	4
2	556	2	6:36393586:A:T	rs200827677	6	36393586	3.656e-40	123	1
2	557	2	6:36412213:C:T	rs11757842	6	36412213	3.352e-38	206	7
2	558	2	6:36495872:C:T	rs138684015	6	36495872	1.649e-18	35	13
2	559	2	6:36548225:A:G	rs7776298	6	36548225	3.002e-09	10	1
2	560	2	6:36552877:A:T	rs12215712	6	36552877	7.742e-18	2	1
2	561	2	6:36556730:C:T	rs9380582	6	36556730	8.994e-44	85	1
2	562	2	6:36620499:C:G	rs10947616	6	36620499	1.958e-32	61	2
2	563	2	6:36645696:A:G	rs2395655	6	36645696	5.85e-23	1	1
2	564	2	6:36653597:C:T	rs1059234	6	36653597	2.939e-31	16	1
2	565	2	6:36664280:A:G	rs9394372	6	36664280	7.262e-19	9	1
2	566	2	6:36669029:A:G	rs76933890	6	36669029	1.121e-08	21	2
2	567	2	6:36686407:C:T	rs236486	6	36686407	1.919e-23	12	1
2	568	2	6:36707501:A:G	rs6904294	6	36707501	4.697e-25	16	1
2	569	2	6:36714491:A:G	rs929051	6	36714491	1.808e-19	4	1
2	570	2	6:36720066:C:T	rs58471412	6	36720066	1.46e-128	22	1
2	571	2	6:36723160:A:G	rs4236052	6	36723160	5.817e-34	11	2
2	572	2	6:36736102:A:C	rs236426	6	36736102	1.486e-20	15	2
2	573	2	6:36745540:C:G	rs144332307	6	36745540	6.454e-31	1	1
2	574	2	6:36747889:C:T	rs236416	6	36747889	2.098e-28	1	1
2	575	2	6:36753140:A:T	rs236414	6	36753140	2.284e-13	3	1
2	576	2	6:36753463:C:T	rs236413	6	36753463	3.86e-36	1	1
2	577	2	6:36755668:A:G	rs9380602	6	36755668	6.466e-31	1	1
2	578	2	6:36759768:A:C	rs9349011	6	36759768	5.96e-19	16	1
2	579	2	6:36759976:A:C	rs3213538	6	36759976	1.117e-114	6	1
2	580	2	6:36766292:C:T	rs6940728	6	36766292	1.951e-21	1	1
2	581	2	6:36779998:A:T	rs236389	6	36779998	4.16e-11	5	1
2	582	2	6:36789547:A:G	rs236377	6	36789547	7.657e-28	2	2
2	583	2	6:36791412:A:C	rs4714014	6	36791412	5.003e-09	2	1
2	584	2	6:36820565:A:G	rs236349	6	36820565	3.755e-26	36	4
2	585	2	6:36850510:C:T	rs374360645	6	36850510	2.83e-10	1	1
2	586	2	6:36908382:A:G	rs697749	6	36908382	2.428e-13	1	1
2	587	2	6:36919148:C:T	rs4714027	6	36919148	8.357e-75	1	1
2	588	2	6:36924516:C:T	rs10947652	6	36924516	1.506e-190	6	1
2	589	2	6:36932327:A:G	rs1063021	6	36932327	9.561e-16	32	2
2	590	2	6:36939213:C:T	rs3778027	6	36939213	5.79e-20	1	1
2	591	2	6:36960738:G:T	rs4714030	6	36960738	6.33e-23	31	1
2	592	2	6:36968063:A:T	rs16889370	6	36968063	9.04e-299	47	2
2	593	2	6:36988364:C:T	rs831504	6	36988364	3.526e-18	6	1
2	594	2	6:36996773:C:G	rs708017	6	36996773	4.06e-114	42	1
2	595	2	6:37003071:C:G	rs9470463	6	37003071	1.616e-24	56	2
2	596	2	6:37035571:A:T	rs73411578	6	37035571	9.705e-31	3	1
2	597	2	6:37061182:C:T	rs9366929	6	37061182	2.452e-12	4	1
2	598	2	6:37065713:C:G	rs9296213	6	37065713	1.13e-83	16	1
2	599	2	6:37098518:A:G	rs9368984	6	37098518	1.109e-11	2	1
2	600	2	6:37102822:A:G	rs9380645	6	37102822	4.792e-74	24	1
2	601	2	6:37111973:C:T	rs10947660	6	37111973	1.145e-12	3	1
2	602	2	6:37113546:A:G	rs2788078	6	37113546	5.825e-146	3	1
2	603	2	6:37129932:A:C	rs262909	6	37129932	3.656e-27	27	2
2	604	2	6:37477000:A:C	rs2254710	6	37477000	8.062e-20	71	2
2	605	2	6:37500067:A:G	rs2246439	6	37500067	9.69e-23	15	1
2	606	2	6:37508585:C:T	rs2797779	6	37508585	5.847e-250	20	1
2	607	2	6:37510932:G:T	rs2797777	6	37510932	9.647e-15	10	1
2	608	2	6:37526918:A:G	rs7739470	6	37526918	1.609e-21	32	1
2	609	2	6:37546593:A:G	rs9369009	6	37546593	1.776e-21	17	1
2	610	2	6:37557978:A:G	rs1776441	6	37557978	2.364e-24	33	1
2	611	2	6:37572144:G:T	rs7773994	6	37572144	7.801e-12	1	1
2	612	2	6:37597129:C:T	rs3734316	6	37597129	7.648e-13	1	1
2	613	2	6:37606805:A:G	rs10947686	6	37606805	3.408e-14	7	1
2	614	2	6:37608505:C:T	rs60066809	6	37608505	4.286e-188	23	4
2	615	2	6:37633072:A:G	rs6903441	6	37633072	1.006e-09	1	1
2	616	2	6:37644569:A:G	rs1972187	6	37644569	1.342e-10	8	1
2	617	2	6:37648778:C:G	rs570911662	6	37648778	4.808e-11	2	1
2	618	2	6:37648790:A:C	rs73734242	6	37648790	1.869e-79	11	1
2	619	2	6:37688151:C:T	rs6458014	6	37688151	1.02e-08	8	1
2	620	2	6:37722549:G:T	rs6922267	6	37722549	4.629e-12	2	1
2	621	2	6:37761564:G:T	rs9369022	6	37761564	3.737e-12	18	1
2	622	2	6:37791578:G:T	rs259720	6	37791578	2.023e-23	1	1
2	623	2	6:37954591:C:T	rs72850871	6	37954591	3.84e-126	70	12
2	624	2	6:37969064:A:C	rs6933547	6	37969064	1.652e-08	17	5
2	625	2	6:38072484:A:T	rs6458040	6	38072484	1.431e-09	208	3
2	626	2	6:38162310:A:G	rs9470825	6	38162310	5.132e-20	62	1
2	627	2	6:38204838:A:G	rs10947722	6	38204838	5.563e-22	20	2
2	628	2	6:38223807:C:T	rs9369042	6	38223807	5.418e-29	3	1
2	629	2	6:38244233:C:G	rs9462423	6	38244233	4.477e-08	21	1
2	630	2	6:38244373:A:T	rs4626419	6	38244373	5.348e-44	8	1
2	631	2	6:38272883:C:T	rs12208912	6	38272883	9.159e-21	7	2
2	632	2	6:38343726:A:G	rs9366958	6	38343726	7.15e-18	37	2
2	633	2	6:38467664:A:G	rs12206905	6	38467664	2.358e-62	36	2
2	634	2	6:38886547:A:T	rs12200524	6	38886547	5.885e-125	21	6
2	635	2	6:38907072:C:G	rs9380810	6	38907072	1.526e-10	11	1
2	636	2	6:38991516:C:G	rs761385	6	38991516	8.635e-21	37	1
2	637	2	6:39183470:C:T	rs10456100	6	39183470	7.999e-18	6	1
2	638	2	6:39244185:A:G	rs2815046	6	39244185	1.686e-16	9	2
2	639	2	6:39301442:C:T	rs4714239	6	39301442	8.293e-46	2	1
2	640	2	6:39342344:C:T	rs72860035	6	39342344	1.671e-67	79	1
2	641	2	6:39743239:C:T	rs302615	6	39743239	2.059e-09	30	2
2	642	2	6:40040085:A:T	rs6458131	6	40040085	2.513e-15	1	1
2	643	3	6:55770337:A:G	rs1596976	6	55770337	1.401e-08	2	1
2	644	3	6:55992706:C:T	rs4452633	6	55992706	1.017e-10	93	4
2	645	3	6:56060905:A:G	rs3899395	6	56060905	3.655e-10	6	4
2	646	3	6:56222623:A:G	rs117602279	6	56222623	2.958e-12	1	1
2	647	3	6:56366190:C:T	rs146941321	6	56366190	2.933e-21	2	1
2	648	3	6:56425409:A:G	rs141007158	6	56425409	1.291e-25	12	1
2	649	3	6:56501234:A:G	rs144804328	6	56501234	1.875e-28	1	1
2	650	3	6:56857665:A:C	rs1562908	6	56857665	1.395e-16	126	2
2	651	3	6:56941361:C:T	rs8180538	6	56941361	2.543e-17	134	2
2	652	3	6:57063946:A:G	rs12195875	6	57063946	1.944e-17	1	1
2	653	3	6:57106703:C:T	rs148108129	6	57106703	2.295e-39	1	1
2	654	3	6:57160897:A:G	rs7767082	6	57160897	9.855e-14	1	1
2	655	3	6:57176499:A:G	rs6916718	6	57176499	1.033e-12	31	2
2	656	3	6:57201132:A:G	rs7754091	6	57201132	3.194e-09	98	3
2	657	3	6:57213975:A:G	rs7738699	6	57213975	2.089e-31	29	2
2	658	4	6:58371737:A:G	rs62464130	6	58371737	2.771e-16	359	3
2	659	5	6:62669615:C:G	rs139753688	6	62669615	2.043e-95	21	1
2	660	5	6:62788937:C:G	rs7741257	6	62788937	2.687e-09	206	12
2	661	5	6:62846349:A:G	rs75465119	6	62846349	2.455e-72	47	2
2	662	5	6:62849468:A:T	rs419585	6	62849468	1.772e-13	1	1
2	663	5	6:62948594:C:T	rs176614	6	62948594	2.955e-19	1	1
2	664	5	6:63147198:C:T	rs4644036	6	63147198	1.789e-11	375	18
2	665	5	6:63198297:A:G	rs79865883	6	63198297	4.928e-99	2	1
2	666	5	6:63224998:A:G	rs6910728	6	63224998	9.489e-27	130	3
2	667	5	6:63304157:A:G	rs62419097	6	63304157	1.238e-50	1	1
2	668	5	6:63385137:A:G	rs6902092	6	63385137	3.197e-08	185	3
2	669	5	6:63536078:A:C	rs9447429	6	63536078	2.762e-110	833	31
2	670	5	6:63564633:A:G	rs4710385	6	63564633	6.191e-15	11	4
2	671	5	6:63759049:C:T	rs4710240	6	63759049	4.344e-11	23	6
2	672	5	6:63771225:A:G	rs9294075	6	63771225	8.239e-51	137	1
2	673	5	6:63984410:G:T	rs9341780	6	63984410	2.291e-08	58	1
2	674	5	6:64006860:C:T	rs150454580	6	64006860	3.205e-94	31	2
2	675	5	6:64087836:A:G	rs824386	6	64087836	9.84e-13	3	1
2	676	5	6:64850264:A:T	rs76001748	6	64850264	1.321e-56	13	4
2	677	5	6:64885456:C:G	rs78749362	6	64885456	4.764e-55	16	11
2	678	5	6:65246335:C:T	rs77102820	6	65246335	1.236e-36	10	5
2	679	5	6:65305659:C:T	rs12209029	6	65305659	7.483e-09	27	2
2	680	5	6:65386262:G:T	rs114247491	6	65386262	9.591e-29	4	3
2	681	5	6:65484758:A:G	rs2055172	6	65484758	6.475e-16	1	1
2	682	5	6:65509089:C:T	rs12215142	6	65509089	1.926e-36	4	1
2	683	5	6:65578698:A:G	rs79990121	6	65578698	6.822e-18	4	2
2	684	5	6:65602149:A:G	rs78255139	6	65602149	2.955e-12	1	1
2	685	6	11:45730520:A:C	rs192387104	11	45730520	5.79e-11	2	1
2	686	7	11:46394844:G:T	rs146364498	11	46394844	3.227e-09	3	2
2	687	7	11:47114824:A:G	rs74333972	11	47114824	1.399e-08	2	1
2	688	7	11:47448547:C:G	rs61895077	11	47448547	5.114e-12	131	7
2	689	7	11:47462176:A:G	rs78559029	11	47462176	5.824e-25	3	1
2	690	7	11:47779470:G:T	rs11820480	11	47779470	4.291e-10	181	9
2	691	7	11:48077411:C:G	rs75874665	11	48077411	1.15e-71	2	1
2	692	7	11:48115606:A:G	rs7130402	11	48115606	6.254e-20	8	1
2	693	7	11:48234924:A:G	rs7927965	11	48234924	8.701e-13	985	26
2	694	7	11:48346996:A:G	rs12794960	11	48346996	6.548e-98	1	1
2	695	7	11:49037780:C:T	rs11604358	11	49037780	3.041e-106	351	26
2	696	7	11:49157883:A:T	rs4929891	11	49157883	1.475e-47	3	1
2	697	7	11:49255389:C:T	rs4103567	11	49255389	9.42e-16	409	25
2	698	7	11:49791685:G:T	rs34381887	11	49791685	2.368e-143	599	27
2	699	7	11:50040152:C:T	rs28417656	11	50040152	3.271e-11	1509	44
2	700	7	11:50473174:C:T	rs1522925	11	50473174	1.507e-08	8	1
2	701	7	11:51422683:A:G	rs560036	11	51422683	1.228e-09	733	18
2	702	8	11:55270032:C:T	rs12802877	11	55270032	5.215e-122	1220	31
2	703	8	11:55318619:A:G	rs479013	11	55318619	1.549e-10	299	15
2	704	8	11:55431496:C:T	rs11230593	11	55431496	6.424e-15	125	21
2	705	8	11:55508167:C:T	rs10897182	11	55508167	7.203e-18	23	1
2	706	8	11:55872657:A:C	rs28681529	11	55872657	8.96e-41	235	1
2	707	8	11:56119827:A:G	rs57377676	11	56119827	1.407e-26	225	20
2	708	8	11:56171941:A:T	rs11228263	11	56171941	3.952e-08	238	3
2	709	8	11:56306773:A:C	rs9651721	11	56306773	2.259e-97	1049	26
2	710	8	11:56408174:A:G	rs4479008	11	56408174	2.671e-19	72	10
2	711	8	11:56492866:A:T	rs61902472	11	56492866	4.81e-20	62	2
2	712	8	11:56542757:C:T	rs1943637	11	56542757	1.953e-76	82	4
2	713	8	11:56546278:C:T	rs61902518	11	56546278	2.41e-10	81	4
2	714	8	11:56573675:A:G	rs141394107	11	56573675	6.611e-39	2	1
2	715	8	11:56626235:C:T	rs7109192	11	56626235	9.344e-10	1	1
2	716	8	11:56643586:C:T	rs1938746	11	56643586	1.387e-18	3	1
2	717	8	11:56665056:C:T	rs17640952	11	56665056	4.769e-42	58	2
2	718	8	11:56670053:A:C	rs1783464	11	56670053	1.026e-08	8	1
2	719	8	11:56748124:A:G	rs116953908	11	56748124	2.135e-34	16	4
2	720	8	11:56788423:A:G	rs138238752	11	56788423	6.686e-23	7	1
2	721	8	11:57074745:C:T	rs75419177	11	57074745	2.429e-19	11	2
2	722	8	11:57213036:A:G	rs146424536	11	57213036	3.929e-10	5	4
2	723	8	11:57661969:A:G	rs144755777	11	57661969	2.427e-13	3	2
2	724	8	11:57932632:A:G	rs79259591	11	57932632	8.942e-12	11	4
3	1	1	6:20930113:C:G	rs11970030	6	20930113	1.724e-08	23	3
3	2	1	6:21581616:A:G	rs114997359	6	21581616	1.331e-08	46	1
3	3	1	6:21866147:A:G	rs560003547	6	21866147	4.001e-65	16	1
3	4	1	6:22041133:A:G	rs2328662	6	22041133	1.879e-20	2	1
3	5	1	6:22289140:C:T	rs1205957	6	22289140	4.376e-11	5	1
3	6	1	6:22344369:A:G	rs1205893	6	22344369	2.227e-08	86	1
3	7	2	6:22906613:C:T	rs4712727	6	22906613	1.129e-11	9	1
3	8	2	6:22974226:C:T	rs9393360	6	22974226	2.618e-14	9	1
3	9	2	6:23030781:A:G	rs2498256	6	23030781	1.312e-12	3	2
3	10	2	6:23197535:C:G	rs71535558	6	23197535	8.778e-15	10	1
3	11	2	6:23315461:C:T	rs1072731	6	23315461	4.475e-21	25	1
3	12	2	6:23342232:A:G	rs9379498	6	23342232	2.64e-22	89	2
3	13	2	6:23381935:C:T	rs9393408	6	23381935	5.168e-09	55	2
3	14	2	6:23435415:A:G	rs199035	6	23435415	1.006e-09	15	1
3	15	2	6:23451412:A:G	rs4712766	6	23451412	1.939e-21	3	1
3	16	2	6:23462774:A:C	rs9356865	6	23462774	1.296e-10	15	2
3	17	2	6:23506477:C:T	rs719437	6	23506477	6.161e-93	3	1
3	18	2	6:23521465:C:T	rs199099	6	23521465	9.975e-18	3	1
3	19	2	6:23556224:A:G	rs7749787	6	23556224	2.945e-12	4	1
3	20	2	6:23593375:A:G	rs197988	6	23593375	1.362e-10	17	1
3	21	2	6:23657168:C:T	rs550050	6	23657168	1.118e-19	1	1
3	22	2	6:23667206:C:T	rs9379536	6	23667206	1.029e-94	3	1
3	23	2	6:23683509:C:G	rs526263	6	23683509	2.985e-22	4	1
3	24	2	6:23685117:C:T	rs12191169	6	23685117	1.6e-128	79	1
3	25	2	6:23709107:A:G	rs2038827	6	23709107	2.045e-14	40	2
3	26	2	6:23734913:A:G	rs7754882	6	23734913	1.725e-34	58	7
3	27	2	6:23736848:C:T	rs2328791	6	23736848	1.186e-28	6	1
3	28	2	6:23745203:A:C	rs2328780	6	23745203	5.462e-55	1	1
3	29	2	6:23766836:C:T	rs13206774	6	23766836	2.135e-120	84	4
3	30	2	6:23792240:A:G	rs6456577	6	23792240	3.578e-35	7	1
3	31	2	6:23805281:A:G	rs9348608	6	23805281	8.904e-28	25	4
3	32	2	6:23846778:A:T	rs2328814	6	23846778	2.193e-19	24	2
3	33	2	6:23856148:A:G	rs77658397	6	23856148	7.84e-97	41	2
3	34	2	6:23863817:C:G	rs6922292	6	23863817	1.216e-13	1	1
3	35	2	6:23907393:C:T	rs2203083	6	23907393	1.86e-26	44	2
3	36	2	6:23909811:A:C	rs481314	6	23909811	2.103e-25	1	1
3	37	2	6:23912263:A:G	rs1511466	6	23912263	1.947e-23	15	1
3	38	2	6:23934310:C:T	rs540748	6	23934310	6.185e-25	3	1
3	39	2	6:23942549:C:T	rs113004122	6	23942549	3.401e-304	8	1
3	40	2	6:23943215:C:G	rs9379620	6	23943215	9.2e-14	1	1
3	41	2	6:23962105:G:T	rs578632	6	23962105	1.465e-17	19	1
3	42	2	6:23964851:A:G	rs707876	6	23964851	5.826e-21	1	1
3	43	2	6:24010264:A:G	rs9295612	6	24010264	5.729e-22	18	2
3	44	2	6:24014419:G:T	rs9358739	6	24014419	1.445e-32	1	1
3	45	2	6:24026095:A:G	rs9356920	6	24026095	3.989e-33	4	1
3	46	2	6:24035042:C:G	rs9358742	6	24035042	8.079e-11	7	1
3	47	2	6:24079756:A:G	rs12216082	6	24079756	1.08e-17	47	2
3	48	2	6:24105447:A:G	rs9379643	6	24105447	1.223e-55	2	1
3	49	2	6:24108657:A:T	rs12662101	6	24108657	3.201e-63	18	1
3	50	2	6:24147572:A:G	rs3178	6	24147572	1.039e-19	4	1
3	51	2	6:24163814:A:G	rs61528653	6	24163814	4.236e-23	36	1
3	52	2	6:24195935:C:G	rs793850	6	24195935	8.152e-39	41	3
3	53	2	6:24277488:C:T	rs9393547	6	24277488	1.285e-08	49	4
3	54	2	6:24294055:C:T	rs78612998	6	24294055	3.474e-08	4	2
3	55	2	6:24303195:C:T	rs3846829	6	24303195	5.327e-27	26	1
3	56	2	6:24370358:C:T	rs793664	6	24370358	1.317e-57	18	2
3	57	2	6:24391075:A:G	rs793676	6	24391075	8.811e-67	3	1
3	58	2	6:24436760:A:G	rs2273605	6	24436760	2.955e-63	34	3
3	59	2	6:24442085:A:G	rs138711481	6	24442085	3.567e-09	1	1
3	60	2	6:24451256:A:G	rs6456614	6	24451256	1.705e-58	16	1
3	61	2	6:24463497:A:G	rs2793444	6	24463497	2.451e-56	48	1
3	62	2	6:24464511:G:T	rs2817244	6	24464511	5.751e-186	56	1
3	63	2	6:24468927:A:G	rs2744563	6	24468927	4.121e-09	1	1
3	64	2	6:24476553:A:G	rs760904	6	24476553	3.072e-39	31	1
3	65	2	6:24484629:A:C	rs114693458	6	24484629	2.105e-10	88	2
3	66	2	6:24502123:A:G	rs9467203	6	24502123	2.841e-119	47	1
3	67	2	6:24548972:C:T	rs807531	6	24548972	3.127e-80	22	2
3	68	2	6:24559281:A:G	rs807541	6	24559281	7.899e-11	12	1
3	69	2	6:24582209:A:T	rs57310311	6	24582209	1.606e-08	32	5
3	70	2	6:24585547:A:G	rs2760135	6	24585547	2.375e-97	21	2
3	71	2	6:24618761:A:G	rs56895808	6	24618761	8.355e-18	15	1
3	72	2	6:24650671:C:T	rs707887	6	24650671	6.476e-10	87	1
3	73	2	6:24650761:A:G	rs3087943	6	24650761	3.001e-08	1	1
3	74	2	6:24654443:C:T	rs3181238	6	24654443	1.594e-40	5	1
3	75	2	6:24664621:C:T	rs116596225	6	24664621	3.697e-08	29	1
3	76	2	6:24673620:A:G	rs7765052	6	24673620	8.875e-35	51	2
3	77	2	6:24699652:A:C	rs60555264	6	24699652	2.865e-21	1	1
3	78	2	6:24722826:A:C	rs6941866	6	24722826	2.616e-58	16	2
3	79	2	6:24762836:A:T	rs2754772	6	24762836	6.959e-39	11	1
3	80	2	6:24771431:A:C	rs2493333	6	24771431	1.46e-14	11	1
3	81	2	6:24789121:C:G	rs9366581	6	24789121	1.405e-38	11	1
3	82	2	6:24795680:C:T	rs6910956	6	24795680	1.128e-20	20	2
3	83	2	6:24818194:C:T	rs61528548	6	24818194	1.007e-34	1	1
3	84	2	6:24830306:C:G	rs56733961	6	24830306	6.082e-53	43	1
3	85	2	6:24830680:C:G	rs79868980	6	24830680	8.018e-09	9	1
3	86	2	6:24844443:C:T	rs10946731	6	24844443	2.888e-10	8	1
3	87	2	6:24851787:C:T	rs9393592	6	24851787	6.232e-27	1	1
3	88	2	6:24855224:C:T	rs4431425	6	24855224	1.801e-21	16	1
3	89	2	6:24881498:C:T	rs6930916	6	24881498	7.468e-108	13	1
3	90	2	6:24902113:A:G	rs2817726	6	24902113	7.22e-42	24	1
3	91	2	6:24923930:A:C	rs430661	6	24923930	7.966e-42	3	1
3	92	2	6:24928081:A:G	rs55927112	6	24928081	6.446e-14	3	1
3	93	2	6:24942042:A:G	rs13202601	6	24942042	2.078e-08	17	1
3	94	2	6:24948146:A:G	rs1739316	6	24948146	4.429e-86	6	1
3	95	2	6:24951199:A:G	rs647297	6	24951199	2.211e-19	1	1
3	96	2	6:24951809:A:G	rs387628	6	24951809	1.702e-106	1	1
3	97	2	6:24956426:A:G	rs9348651	6	24956426	1.382e-46	33	1
3	98	2	6:25003339:C:T	6:25003339	6	25003339	1.201e-15	12	2
3	99	2	6:25028200:A:C	rs9356958	6	25028200	2.72e-85	52	2
3	100	2	6:25066171:A:T	rs9356960	6	25066171	6.798e-124	26	1
3	101	2	6:25077007:G:T	rs143743502	6	25077007	5.44e-14	2	1
3	102	2	6:25111239:A:G	rs1972205	6	25111239	6.11e-210	28	3
3	103	2	6:25141224:C:T	rs3749873	6	25141224	2.717e-22	2	1
3	104	2	6:25170501:A:G	rs12529629	6	25170501	1.178e-130	1	1
3	105	2	6:25180191:A:G	rs5008131	6	25180191	1.589e-45	3	1
3	106	2	6:25185989:G:T	rs9467438	6	25185989	1.006e-143	2	1
3	107	2	6:25227378:C:T	rs9356969	6	25227378	9.998e-279	3	1
3	108	2	6:25239716:A:C	rs9379740	6	25239716	4.138e-101	31	1
3	109	2	6:25245873:A:G	rs80272928	6	25245873	2.022e-24	2	1
3	110	2	6:25262159:A:G	rs9393632	6	25262159	3.382e-82	19	1
3	111	2	6:25283177:A:G	rs144350646	6	25283177	9.461e-12	5	1
3	112	2	6:25283500:A:G	rs9358849	6	25283500	3.429e-32	27	1
3	113	2	6:25292401:C:T	rs10456320	6	25292401	2.313e-08	1	1
3	114	2	6:25306363:A:G	rs2690123	6	25306363	1.63e-140	32	1
3	115	2	6:25315540:C:T	rs6936496	6	25315540	9.218e-10	17	1
3	116	2	6:25323133:C:T	rs77656204	6	25323133	4.311e-10	25	2
3	117	2	6:25326813:A:T	rs2690112	6	25326813	5.559e-20	27	2
3	118	2	6:25334288:A:C	rs2744306	6	25334288	1.001e-198	5	1
3	119	2	6:25336424:C:G	rs11754685	6	25336424	1.381e-136	3	1
3	120	2	6:25338021:G:T	rs2744227	6	25338021	5.695e-144	36	2
3	121	2	6:25346955:A:G	rs2690098	6	25346955	1.159e-22	12	2
3	122	2	6:25347646:G:T	rs6456671	6	25347646	1.792e-22	77	1
3	123	2	6:25353197:C:T	rs2690059	6	25353197	9.589e-26	30	1
3	124	2	6:25364735:C:T	rs76282978	6	25364735	1.287e-14	5	1
3	125	2	6:25378113:A:G	rs1927695	6	25378113	4.518e-45	22	1
3	126	2	6:25379926:C:T	rs4711082	6	25379926	3.78e-135	15	1
3	127	2	6:25391293:A:T	rs72830743	6	25391293	8.233e-22	33	2
3	128	2	6:25400396:A:C	rs4712929	6	25400396	8.538e-20	2	1
3	129	2	6:25406696:C:T	rs13214013	6	25406696	4.339e-103	17	2
3	130	2	6:25410162:A:G	rs77551782	6	25410162	9.681e-44	5	1
3	131	2	6:25411187:C:T	rs146458991	6	25411187	5.952e-24	1	1
3	132	2	6:25412628:A:G	rs927986	6	25412628	9.514e-88	3	1
3	133	2	6:25414846:A:G	rs1927693	6	25414846	3.76e-286	2	1
3	134	2	6:25415845:A:G	rs11752825	6	25415845	3.92e-253	6	1
3	135	2	6:25423879:C:T	rs72831251	6	25423879	8.991e-19	5	1
3	136	2	6:25424256:A:G	rs12213948	6	25424256	3.925e-242	4	1
3	137	2	6:25435552:A:G	rs76448003	6	25435552	2.177e-23	1	1
3	138	2	6:25439492:C:T	rs9366624	6	25439492	8.742e-39	16	1
3	139	2	6:25444966:A:G	rs76417859	6	25444966	8.439e-15	7	1
3	140	2	6:25446283:A:G	rs62392388	6	25446283	3.177e-164	13	1
3	141	2	6:25452220:C:T	rs6934330	6	25452220	2.296e-39	22	1
3	142	2	6:25473413:A:G	rs384340	6	25473413	1.017e-208	2	1
3	143	2	6:25488583:C:T	rs2274089	6	25488583	8.688e-12	14	2
3	144	2	6:25490089:C:T	rs301394	6	25490089	0	11	1
3	145	2	6:25499976:A:G	rs16890663	6	25499976	5.996e-11	8	2
3	146	2	6:25504877:C:T	rs12525553	6	25504877	8.788e-105	1	1
3	147	2	6:25553712:G:T	rs2072848	6	25553712	1.552e-280	71	3
3	148	2	6:25669278:G:T	rs56206297	6	25669278	6.926e-26	16	2
3	149	2	6:25682044:G:T	rs138531232	6	25682044	3.277e-08	19	4
3	150	2	6:25684405:C:T	rs4711092	6	25684405	2.704e-196	1	1
3	151	2	6:25692021:C:T	rs76772871	6	25692021	2.931e-11	4	1
3	152	2	6:25703529:A:C	rs76703022	6	25703529	4.387e-14	6	2
3	153	2	6:25709223:C:T	rs6456691	6	25709223	6.403e-16	41	4
3	154	2	6:25750896:A:G	rs191929921	6	25750896	9.419e-29	24	4
3	155	2	6:25752628:A:G	rs116956053	6	25752628	2.549e-10	4	1
3	156	2	6:25855624:C:T	rs717551	6	25855624	5.396e-13	15	3
3	157	2	6:25897618:G:T	rs72830103	6	25897618	1.393e-17	24	3
3	158	2	6:25960799:C:T	rs117965842	6	25960799	2.318e-12	2	1
3	159	2	6:25963966:C:T	rs12210098	6	25963966	1.944e-16	3	1
3	160	2	6:26023032:C:T	rs72834629	6	26023032	3.984e-18	48	1
3	161	2	6:26040322:C:T	rs60892124	6	26040322	1.801e-15	76	5
3	162	2	6:26107463:A:G	rs198846	6	26107463	3.026e-22	9	1
3	163	2	6:26150809:C:G	rs75546109	6	26150809	4.68e-37	31	1
3	164	2	6:26200752:C:G	rs3757136	6	26200752	1.486e-19	20	1
3	165	2	6:26205770:A:C	rs9393687	6	26205770	3.043e-24	1	1
3	166	2	6:26293012:A:G	rs77704135	6	26293012	4.481e-48	4	2
3	167	2	6:26340872:A:G	rs55964643	6	26340872	1.165e-14	1	1
3	168	2	6:26344975:C:G	rs10946812	6	26344975	3.786e-102	18	1
3	169	2	6:26398664:A:G	rs12201802	6	26398664	2.614e-17	30	1
3	170	2	6:26404680:A:G	rs1796519	6	26404680	2.336e-14	7	2
3	171	2	6:26443305:A:G	rs188713930	6	26443305	2.444e-08	3	1
3	172	2	6:26650110:A:T	rs138644763	6	26650110	8.064e-09	3	1
3	173	2	6:26681071:C:T	rs142076412	6	26681071	1.132e-16	3	1
3	174	2	6:26789628:C:T	rs2130655	6	26789628	1.184e-25	152	4
3	175	2	6:26880157:C:T	rs3999347	6	26880157	2.024e-23	44	1
3	176	2	6:26888304:C:T	rs187242505	6	26888304	1.763e-31	61	4
3	177	2	6:26949482:A:T	rs4434463	6	26949482	8.077e-19	332	9
3	178	2	6:27017692:C:T	rs139466626	6	27017692	3.508e-08	33	11
3	179	2	6:27187925:A:T	rs566962549	6	27187925	3.476e-12	1	1
3	180	2	6:27228671:C:T	rs76971624	6	27228671	1.306e-09	4	1
3	181	2	6:27287800:C:T	rs12174489	6	27287800	1.199e-231	2	1
3	182	2	6:27308005:A:G	rs149260225	6	27308005	4.14e-60	17	1
3	183	2	6:27411729:A:C	rs76439045	6	27411729	2.273e-34	7	2
3	184	2	6:27411988:C:T	rs79744712	6	27411988	3.17e-26	3	3
3	185	2	6:27457721:C:G	rs149087883	6	27457721	2.985e-11	18	9
3	186	2	6:27481536:A:G	rs143583725	6	27481536	5.31e-60	107	20
3	187	2	6:27574908:A:C	rs142970147	6	27574908	3.83e-36	49	2
3	188	2	6:27664630:A:G	rs117183430	6	27664630	3.372e-08	12	1
3	189	2	6:27684507:A:G	rs72845876	6	27684507	3.783e-62	21	3
3	190	2	6:27740438:A:C	rs12192568	6	27740438	1.429e-61	2	2
3	191	2	6:27879551:C:G	rs9368537	6	27879551	3.344e-42	62	1
3	192	2	6:27923257:A:G	rs148612161	6	27923257	3.287e-12	5	3
3	193	2	6:27938235:A:C	rs276362	6	27938235	6.885e-266	57	1
3	194	2	6:27982501:A:C	6:27982501	6	27982501	1.018e-11	1	1
3	195	2	6:28003222:C:T	rs184084677	6	28003222	5.627e-42	118	3
3	196	2	6:28034318:C:G	rs185939481	6	28034318	4.409e-10	16	6
3	197	2	6:28071393:C:T	rs188105	6	28071393	1.807e-290	60	7
3	198	2	6:28105978:A:G	rs117680617	6	28105978	2.803e-10	4	1
3	199	2	6:28108245:G:T	rs76033823	6	28108245	6.026e-12	2	1
3	200	2	6:28193354:A:G	rs77396427	6	28193354	3.264e-08	11	7
3	201	2	6:28197752:C:G	rs34024998	6	28197752	4.49e-256	96	1
3	202	2	6:28215641:G:T	rs2235359	6	28215641	1.619e-35	50	1
3	203	2	6:28225296:A:G	rs149204020	6	28225296	2.404e-12	1	1
3	204	2	6:28281804:C:T	rs74967533	6	28281804	3.786e-35	24	1
3	205	2	6:28464927:A:T	rs183719819	6	28464927	4.537e-33	18	4
3	206	2	6:28481663:C:T	rs148656136	6	28481663	9.361e-09	1	1
3	207	2	6:28500911:A:C	rs571726149	6	28500911	1.907e-09	1	1
3	208	2	6:28516725:A:G	rs79848291	6	28516725	1.82e-49	15	3
3	209	2	6:28547215:A:G	rs117423601	6	28547215	2.481e-34	46	9
3	210	2	6:28594342:C:T	rs12206581	6	28594342	5.203e-79	61	2
3	211	2	6:28613079:A:T	rs139614182	6	28613079	5.163e-15	27	6
3	212	2	6:28647722:C:T	rs117585327	6	28647722	1.892e-25	2	1
3	213	2	6:28669610:A:G	rs143144207	6	28669610	3.185e-64	1	1
3	214	2	6:28677498:A:G	rs139675877	6	28677498	1.095e-15	2	1
3	215	2	6:28684132:C:T	rs115397636	6	28684132	1.645e-10	130	1
3	216	2	6:28686284:C:T	rs2394152	6	28686284	0	361	1
3	217	2	6:28713434:C:T	6:28713434	6	28713434	4.067e-08	14	3
3	218	2	6:28714761:A:C	rs7763390	6	28714761	4.725e-102	21	2
3	219	2	6:28735519:C:G	rs118168437	6	28735519	6.229e-11	10	4
3	220	2	6:28742331:C:T	rs79128439	6	28742331	2.21e-36	166	4
3	221	2	6:28758591:A:C	rs58669168	6	28758591	1.966e-11	12	6
3	222	2	6:28771388:A:G	rs35045623	6	28771388	1.342e-65	91	17
3	223	2	6:28792220:G:T	rs41316602	6	28792220	1.645e-35	10	3
3	224	2	6:28845491:A:G	rs117574667	6	28845491	4.596e-16	7	7
3	225	2	6:28853987:C:G	rs139494877	6	28853987	1.238e-15	26	8
3	226	2	6:28875959:A:G	rs117846312	6	28875959	4.394e-18	5	1
3	227	2	6:28894614:C:T	rs41316618	6	28894614	8.068e-29	178	9
3	228	2	6:28898654:A:G	rs180803647	6	28898654	6.255e-11	10	2
3	229	2	6:28914656:C:T	rs150843095	6	28914656	1.754e-12	28	7
3	230	2	6:28919625:A:G	rs7745220	6	28919625	4.376e-64	246	11
3	231	2	6:28939117:C:T	rs12055619	6	28939117	2.797e-38	9	5
3	232	2	6:28940186:A:C	6:28940186	6	28940186	2.47e-31	2	1
3	233	2	6:28956539:A:C	rs116869972	6	28956539	4.108e-10	2	2
3	234	2	6:28956541:C:T	rs112421807	6	28956541	7.066e-11	200	1
3	235	2	6:28959475:C:T	rs148672491	6	28959475	4.51e-19	13	1
3	236	2	6:29038857:A:G	rs149704780	6	29038857	1.892e-33	22	8
3	237	2	6:29059962:C:T	rs3129789	6	29059962	6.226e-85	4	4
3	238	2	6:29097247:A:G	rs9283885	6	29097247	2.036e-87	50	4
3	239	2	6:29099920:A:G	rs142242329	6	29099920	3.126e-17	17	9
3	240	2	6:29160744:G:T	rs112988227	6	29160744	1.536e-31	41	9
3	241	2	6:29210998:A:T	rs9468500	6	29210998	3.905e-29	66	2
3	242	2	6:29229480:A:G	6:29229480	6	29229480	4.47e-33	2	1
3	243	2	6:29243041:G:T	rs181752128	6	29243041	2.727e-19	26	14
3	244	2	6:29252758:A:T	rs116466121	6	29252758	2.696e-62	81	5
3	245	2	6:29269066:A:G	rs7754926	6	29269066	1.065e-33	209	6
3	246	2	6:29275507:C:T	rs9257696	6	29275507	7.845e-87	46	2
3	247	2	6:29289929:C:T	rs146185592	6	29289929	9.257e-19	4	1
3	248	2	6:29335080:A:C	rs148472353	6	29335080	7.579e-11	9	1
3	249	2	6:29343355:C:T	rs9257802	6	29343355	5.28e-69	2	1
3	250	2	6:29355494:A:C	rs1419639	6	29355494	1.339e-41	1	1
3	251	2	6:29359024:A:G	6:29359024	6	29359024	9.546e-15	1	1
3	252	2	6:29361707:G:T	rs16894836	6	29361707	6.689e-98	26	5
3	253	2	6:29378439:A:G	rs2097771	6	29378439	9.031e-293	85	2
3	254	2	6:29379734:C:T	rs117680413	6	29379734	6.717e-31	1	1
3	255	2	6:29386912:C:T	rs115175926	6	29386912	9.879e-42	357	3
3	256	2	6:29389528:C:T	rs151001546	6	29389528	1.058e-25	10	1
3	257	2	6:29393981:C:T	rs140192033	6	29393981	1.761e-35	5	2
3	258	2	6:29397521:A:T	rs7349908	6	29397521	3.665e-170	34	1
3	259	2	6:29399449:G:T	rs116963310	6	29399449	6.031e-21	2	2
3	260	2	6:29400236:C:G	rs9257858	6	29400236	1.712e-117	1	1
3	261	2	6:29427068:A:G	rs59818916	6	29427068	3.654e-21	5	2
3	262	2	6:29436911:C:T	rs116973845	6	29436911	3.229e-19	2	2
3	263	2	6:29441502:A:G	rs117137251	6	29441502	2.585e-11	2	2
3	264	2	6:29442975:A:C	rs77454196	6	29442975	1.197e-23	4	1
3	265	2	6:29451845:C:T	rs118077891	6	29451845	2.222e-10	2	2
3	266	2	6:29487535:A:G	rs9468541	6	29487535	4.461e-42	11	4
3	267	2	6:29487968:C:T	rs12210150	6	29487968	4.573e-71	57	12
3	268	2	6:29514923:A:G	rs41317798	6	29514923	3.802e-37	4	1
3	269	2	6:29530868:C:T	rs362529	6	29530868	5.79e-70	1	1
3	270	2	6:29541910:A:G	rs138633183	6	29541910	5.444e-12	2	1
3	271	2	6:29544010:A:C	rs117181567	6	29544010	8.582e-23	5	1
3	272	2	6:29555585:A:G	rs17184367	6	29555585	6.824e-269	7	2
3	273	2	6:29569955:A:G	rs3025643	6	29569955	4.653e-104	8	2
3	274	2	6:29576393:A:G	rs29230	6	29576393	2.838e-126	20	1
3	275	2	6:29576590:A:G	rs29263	6	29576590	2.832e-41	102	2
3	276	2	6:29600361:C:T	rs150971595	6	29600361	1.263e-17	4	2
3	277	2	6:29604264:G:T	rs9461540	6	29604264	8.729e-41	4	1
3	278	2	6:29606761:A:G	rs3095268	6	29606761	2.837e-35	1	1
3	279	2	6:29614627:C:G	rs7774576	6	29614627	2.259e-62	5	1
3	280	3	6:33188495:A:G	rs6914404	6	33188495	6.092e-98	16	1
3	281	3	6:33232025:C:T	rs460568	6	33232025	1.033e-20	20	1
3	282	3	6:33232521:C:T	rs213201	6	33232521	8.728e-143	83	1
3	283	3	6:33270050:A:G	rs140814057	6	33270050	1.906e-09	2	1
3	284	3	6:33272626:C:T	rs1800837	6	33272626	3.087e-17	28	2
3	285	3	6:33308499:A:G	rs187984126	6	33308499	3.365e-57	37	2
3	286	3	6:33323265:C:T	rs211468	6	33323265	1.802e-100	26	1
3	287	3	6:33351451:A:T	rs114972028	6	33351451	6.31e-54	1	1
3	288	3	6:33388894:C:G	rs114993678	6	33388894	3.513e-53	14	2
3	289	3	6:33389381:G:T	rs211456	6	33389381	6.737e-122	132	1
3	290	3	6:33452886:A:G	rs9380361	6	33452886	4.592e-134	3	1
3	291	3	6:33461784:A:G	rs34838160	6	33461784	7.106e-50	5	1
3	292	3	6:33492839:A:G	rs72880049	6	33492839	6.155e-114	4	1
3	293	3	6:33509023:A:C	rs210199	6	33509023	3.762e-44	20	3
3	294	3	6:33516644:C:T	rs9461875	6	33516644	3.442e-23	183	1
3	295	3	6:33525794:A:C	rs79034965	6	33525794	2.528e-10	2	2
3	296	3	6:33528281:C:T	rs138892259	6	33528281	3.09e-50	19	1
3	297	3	6:33558915:C:T	rs386906	6	33558915	1.574e-70	5	1
3	298	3	6:33561687:A:G	rs210164	6	33561687	7.168e-113	26	1
3	299	3	6:33581150:C:T	rs138965061	6	33581150	1.678e-09	7	1
3	300	3	6:33583732:A:G	rs13203795	6	33583732	1.462e-26	16	1
3	301	3	6:33584639:A:G	rs6924010	6	33584639	6.789e-15	39	1
3	302	3	6:33589032:C:G	rs6910386	6	33589032	4.354e-28	1	1
3	303	3	6:33601132:A:G	rs9469532	6	33601132	1.775e-129	18	2
3	304	3	6:33609435:C:G	rs149728929	6	33609435	3.064e-61	1	1
3	305	3	6:33618162:A:T	rs9394159	6	33618162	3.13e-114	12	1
3	306	3	6:33620397:C:G	rs1830873	6	33620397	9.378e-183	3	1
3	307	3	6:33626042:C:T	rs73408232	6	33626042	2.15e-48	3	1
3	308	3	6:33638657:A:G	rs2274198	6	33638657	3.02e-100	12	1
3	309	3	6:33642593:A:G	rs942639	6	33642593	2.73e-08	17	1
3	310	3	6:33645457:C:G	rs9469552	6	33645457	7.207e-18	6	1
3	311	3	6:33648144:C:T	rs11967839	6	33648144	3.38e-28	5	1
3	312	3	6:33651129:C:T	rs942636	6	33651129	9.931e-25	6	1
3	313	3	6:33667965:G:T	rs594223	6	33667965	6.03e-30	3	1
3	314	3	6:33677556:A:C	rs9380374	6	33677556	4.425e-168	16	5
3	315	3	6:33695130:A:G	rs2281830	6	33695130	2.72e-165	38	2
3	316	3	6:33734793:A:G	rs943469	6	33734793	1.74e-27	3	1
3	317	3	6:33782173:A:G	rs144326959	6	33782173	8.372e-90	8	5
3	318	3	6:33784998:C:G	rs4607416	6	33784998	2.669e-131	35	5
3	319	3	6:33804137:C:T	rs7761859	6	33804137	8.039e-100	16	3
3	320	3	6:33810404:C:T	rs75552893	6	33810404	1.547e-48	4	2
3	321	3	6:33815924:A:G	rs2209345	6	33815924	1.683e-16	36	1
3	322	3	6:33818725:A:G	rs183661661	6	33818725	7.57e-12	1	1
3	323	3	6:33819582:A:G	rs11753213	6	33819582	7.263e-270	1	1
3	324	3	6:33825358:A:G	rs2104362	6	33825358	3.693e-71	13	1
3	325	3	6:33838727:C:T	rs62397636	6	33838727	1.458e-37	6	1
3	326	3	6:33841785:A:G	rs1853656	6	33841785	2.07e-70	1	1
3	327	3	6:33842877:A:G	rs12211048	6	33842877	4.264e-49	1	1
3	328	3	6:33847919:A:C	rs6912350	6	33847919	2.342e-126	11	1
3	329	3	6:33863662:A:G	rs1998630	6	33863662	4.649e-86	1	1
3	330	3	6:33864998:A:G	rs3800341	6	33864998	2.661e-37	1	1
3	331	3	6:33869806:A:G	rs9296102	6	33869806	2.897e-96	1	1
3	332	3	6:33872257:C:T	rs9394179	6	33872257	1.579e-64	2	1
3	333	3	6:33872561:A:G	rs4713719	6	33872561	9.586e-53	1	1
3	334	3	6:33879800:A:G	rs4711366	6	33879800	1.775e-24	1	1
3	335	3	6:33889404:A:G	rs2499761	6	33889404	5.085e-147	15	1
3	336	3	6:33890342:A:T	rs2499768	6	33890342	2.064e-58	2	2
3	337	3	6:33895001:G:T	rs9368784	6	33895001	5.117e-13	13	1
3	338	3	6:33901255:C:T	rs2477239	6	33901255	2.155e-113	1	1
3	339	3	6:33902653:C:T	rs6457749	6	33902653	3.673e-52	1	1
3	340	3	6:33903529:A:G	rs6939337	6	33903529	1.897e-29	1	1
3	341	3	6:33921175:A:G	rs9469649	6	33921175	4.661e-14	36	2
3	342	3	6:33926102:G:T	rs2495968	6	33926102	1.246e-87	23	2
3	343	3	6:33933481:A:G	rs62399336	6	33933481	2.091e-86	5	1
3	344	3	6:33936925:A:G	rs7755524	6	33936925	1.701e-18	7	1
3	345	3	6:33953646:C:T	rs2499766	6	33953646	1.342e-40	1	1
3	346	3	6:33956472:C:T	rs4256433	6	33956472	8.153e-44	2	1
3	347	3	6:33963009:C:G	rs2495994	6	33963009	4.565e-49	2	1
3	348	3	6:33993621:A:T	rs7772932	6	33993621	3.351e-89	7	2
3	349	3	6:34008006:A:G	rs2229900	6	34008006	4.799e-10	32	1
3	350	3	6:34015650:C:T	rs115459999	6	34015650	3.996e-28	22	2
3	351	3	6:34029204:C:T	rs2451361	6	34029204	2.224e-22	6	1
3	352	3	6:34036983:A:G	rs9469702	6	34036983	1.337e-53	4	1
3	353	3	6:34038597:A:G	rs568421342	6	34038597	1.044e-21	1	1
3	354	3	6:34050673:C:G	rs77451337	6	34050673	5.474e-09	1	1
3	355	3	6:34051334:A:G	rs9368792	6	34051334	2.285e-30	8	1
3	356	3	6:34055485:A:C	rs11968206	6	34055485	4.445e-09	1	1
3	357	3	6:34056583:A:G	rs9469711	6	34056583	6.944e-67	2	1
3	358	3	6:34065234:C:G	rs373645900	6	34065234	2.783e-37	12	1
3	359	3	6:34072561:C:T	rs7763695	6	34072561	2.381e-53	5	1
3	360	3	6:34083564:A:G	rs13196449	6	34083564	1.626e-08	5	1
3	361	3	6:34084862:A:C	rs4713740	6	34084862	2.809e-47	46	1
3	362	3	6:34110808:C:G	rs75432840	6	34110808	1.411e-17	1	1
3	363	3	6:34113037:C:G	rs563704938	6	34113037	4.202e-11	61	8
3	364	3	6:34116700:G:T	rs182291280	6	34116700	4.461e-20	5	2
3	365	3	6:34120333:C:T	rs7756506	6	34120333	2.755e-42	4	1
3	366	3	6:34126264:C:T	rs575553025	6	34126264	4.513e-10	17	1
3	367	3	6:34138960:A:G	rs13210489	6	34138960	9.415e-27	97	1
3	368	3	6:34154652:C:T	rs145223175	6	34154652	1.159e-17	2	1
3	369	3	6:34161343:C:G	rs147494818	6	34161343	1.531e-15	19	2
3	370	3	6:34174662:C:T	rs1759639	6	34174662	1.333e-74	1	1
3	371	3	6:34226337:C:T	rs9357175	6	34226337	4.019e-128	6	1
3	372	3	6:34237797:A:G	rs2797961	6	34237797	5.133e-10	111	2
3	373	3	6:34351767:A:G	rs3778077	6	34351767	9.137e-53	133	3
3	374	3	6:34434715:A:C	rs9296115	6	34434715	9.211e-43	8	1
3	375	3	6:34448315:C:T	rs3846867	6	34448315	6.573e-18	8	1
3	376	3	6:34483015:C:T	rs4713808	6	34483015	1.072e-24	2	1
3	377	3	6:34491013:A:G	rs73746675	6	34491013	2.307e-16	7	1
3	378	3	6:34519547:C:G	rs3778070	6	34519547	2.927e-43	1	1
3	379	3	6:34522572:C:T	rs3798543	6	34522572	8.651e-33	26	1
3	380	3	6:34545999:A:C	rs205270	6	34545999	2.649e-28	8	1
3	381	3	6:34579651:A:G	rs2814980	6	34579651	7.916e-10	309	4
3	382	3	6:34808537:C:T	rs11758962	6	34808537	2.343e-32	34	6
3	383	3	6:34851558:A:G	rs116921367	6	34851558	7.314e-16	4	2
3	384	3	6:34883363:A:G	rs2092428	6	34883363	9.253e-42	62	4
3	385	3	6:35039183:C:G	rs149743744	6	35039183	4.436e-16	4	1
3	386	3	6:35044753:G:T	rs6930756	6	35044753	2.339e-37	49	2
3	387	3	6:35072680:A:G	rs73745097	6	35072680	1.52e-21	33	1
3	388	3	6:35078623:C:G	rs2762346	6	35078623	1.865e-48	67	4
3	389	3	6:35107682:A:T	rs3777748	6	35107682	3.657e-12	24	1
3	390	3	6:35206553:A:C	rs732594	6	35206553	6.115e-29	1	1
3	391	3	6:35211211:C:T	rs9469972	6	35211211	1.063e-21	202	2
3	392	3	6:35233369:C:T	rs188106794	6	35233369	1.542e-15	9	3
3	393	3	6:35246319:A:G	rs10484578	6	35246319	7.063e-39	34	4
3	394	3	6:35404354:C:T	rs2206030	6	35404354	6.463e-25	10	1
3	395	3	6:35416759:A:G	rs9470027	6	35416759	1.696e-09	34	1
3	396	3	6:35420967:A:G	rs11755391	6	35420967	3.998e-30	12	1
3	397	3	6:35439393:G:T	rs4711416	6	35439393	7.592e-09	6	1
3	398	3	6:35443573:G:T	rs2076170	6	35443573	1.167e-35	2	1
3	399	3	6:35463055:A:T	rs10947552	6	35463055	4.679e-13	39	1
3	400	3	6:35465786:A:C	rs1051952	6	35465786	9.05e-16	3	1
3	401	3	6:35469647:A:G	rs7738710	6	35469647	5.627e-23	5	1
3	402	3	6:35485647:C:T	rs12181820	6	35485647	4.637e-08	9	1
3	403	3	6:35500433:C:T	rs9368873	6	35500433	2.124e-59	6	1
3	404	3	6:35579002:A:G	rs3777747	6	35579002	4.658e-26	23	4
3	405	3	6:35702887:A:G	rs2817038	6	35702887	1.863e-16	5	1
3	406	3	6:35703876:A:T	rs149712527	6	35703876	9.287e-09	1	1
3	407	3	6:35707690:A:G	rs2766542	6	35707690	4.907e-11	20	2
3	408	3	6:35725138:C:T	rs2817045	6	35725138	6.232e-18	48	1
3	409	3	6:35741677:C:T	rs2766575	6	35741677	1.42e-18	8	1
3	410	3	6:35752459:C:T	rs2766585	6	35752459	1.063e-19	20	1
3	411	3	6:35756082:C:G	rs9462110	6	35756082	2.389e-11	1	1
3	412	3	6:35760403:C:G	rs2817012	6	35760403	3.671e-57	4	1
3	413	3	6:35772722:A:G	rs16881066	6	35772722	1.56e-13	9	4
3	414	3	6:35783917:C:T	rs35951582	6	35783917	1.641e-86	15	3
3	415	3	6:35820544:C:G	rs2395637	6	35820544	2.857e-18	9	3
3	416	3	6:35923246:C:T	rs2295852	6	35923246	3.517e-61	26	3
3	417	3	6:35955833:A:G	rs10755688	6	35955833	3.802e-52	69	1
3	418	3	6:35985023:C:T	rs1100864	6	35985023	1.928e-27	27	3
3	419	3	6:36107172:A:G	rs2071863	6	36107172	7.32e-30	15	1
3	420	3	6:36147672:C:G	rs9368908	6	36147672	7.452e-22	8	2
3	421	3	6:36228600:G:T	rs9470238	6	36228600	1.768e-80	1	1
3	422	3	6:36230135:A:G	rs4713944	6	36230135	6.395e-30	1	1
3	423	3	6:36254854:C:T	rs6457895	6	36254854	4.412e-09	8	1
3	424	3	6:36267519:C:T	rs11754972	6	36267519	1.045e-08	2	1
3	425	3	6:36289145:A:C	rs763018	6	36289145	2.149e-10	7	1
3	426	3	6:36306099:A:C	rs4713959	6	36306099	1.42e-11	8	1
3	427	3	6:36318575:C:T	rs2269563	6	36318575	7.207e-13	2	1
3	428	3	6:36322975:A:G	rs11966082	6	36322975	2.467e-28	2	1
3	429	3	6:36340040:C:G	rs62403705	6	36340040	1.372e-57	6	1
3	430	3	6:36342181:C:T	rs6457907	6	36342181	3.502e-11	3	1
3	431	3	6:36393586:A:T	rs200827677	6	36393586	5.768e-12	123	1
3	432	3	6:36412213:C:T	rs11757842	6	36412213	4.563e-20	206	7
3	433	3	6:36556730:C:T	rs9380582	6	36556730	9.906e-12	85	1
3	434	3	6:36636080:C:T	rs66761782	6	36636080	4.651e-51	22	1
3	435	3	6:36639968:A:C	rs11758192	6	36639968	5.908e-09	61	2
3	436	3	6:36664280:A:G	rs9394372	6	36664280	6.525e-13	9	1
3	437	3	6:36700833:C:T	rs236460	6	36700833	4.391e-11	11	2
3	438	3	6:36720066:C:T	rs58471412	6	36720066	4.836e-32	22	1
3	439	3	6:36747889:C:T	rs236416	6	36747889	3.202e-08	1	1
3	440	3	6:36753140:A:T	rs236414	6	36753140	4.66e-300	3	1
3	441	3	6:36766292:C:T	rs6940728	6	36766292	2.638e-10	1	1
3	442	3	6:36848838:C:T	rs139464908	6	36848838	1.116e-243	22	4
3	443	3	6:36919148:C:T	rs4714027	6	36919148	1.574e-15	1	1
3	444	3	6:36924516:C:T	rs10947652	6	36924516	2.012e-23	6	1
3	445	3	6:36932327:A:G	rs1063021	6	36932327	3.348e-08	32	2
3	446	3	6:36950412:A:G	rs111469215	6	36950412	1.92e-38	35	2
3	447	3	6:36996773:C:G	rs708017	6	36996773	1.281e-09	42	1
3	448	3	6:37113546:A:G	rs2788078	6	37113546	9.986e-15	3	1
3	449	3	6:37142422:C:T	rs10507	6	37142422	1.818e-15	2	1
3	450	3	6:37576543:A:G	rs7747233	6	37576543	2.614e-09	1	1
3	451	3	6:37636933:C:T	rs72847488	6	37636933	1.524e-10	3	1
3	452	3	6:37687281:C:T	rs6458013	6	37687281	1.547e-09	6	1
3	453	4	11:47448547:C:G	rs61895077	11	47448547	4.135e-08	131	7
3	454	4	11:47462176:A:G	rs78559029	11	47462176	4.071e-16	3	1
3	455	4	11:48077411:C:G	rs75874665	11	48077411	2.134e-48	2	1
3	456	4	11:48115606:A:G	rs7130402	11	48115606	3.078e-10	8	1
3	457	4	11:48346996:A:G	rs12794960	11	48346996	7.9e-68	1	1
3	458	4	11:49037780:C:T	rs11604358	11	49037780	3.742e-65	351	26
3	459	4	11:49157883:A:T	rs4929891	11	49157883	9.111e-23	3	1
3	460	4	11:49748458:C:T	rs371079883	11	49748458	1.193e-94	572	27
3	461	5	11:55116290:G:T	rs12789208	11	55116290	8.634e-83	1178	31
3	462	5	11:55508167:C:T	rs10897182	11	55508167	1.494e-11	23	1
3	463	5	11:55872657:A:C	rs28681529	11	55872657	9.584e-12	235	1
3	464	5	11:56274176:C:G	rs12277890	11	56274176	1.631e-73	1060	27
3	465	5	11:56542757:C:T	rs1943637	11	56542757	2.969e-58	82	4
3	466	5	11:56560800:A:G	rs111772208	11	56560800	8.587e-09	423	3
3	467	5	11:56566605:G:T	rs528894	11	56566605	4.237e-11	1	1
3	468	5	11:56573675:A:G	rs141394107	11	56573675	7.66e-30	2	1
3	469	5	11:56643586:C:T	rs1938746	11	56643586	5.168e-12	3	1
3	470	5	11:56665056:C:T	rs17640952	11	56665056	1.196e-28	58	2
3	471	5	11:56748124:A:G	rs116953908	11	56748124	1.044e-27	16	4
3	472	5	11:56788423:A:G	rs138238752	11	56788423	2.445e-13	7	1
3	473	5	11:57074745:C:T	rs75419177	11	57074745	1.892e-14	11	2
3	474	5	11:57213036:A:G	rs146424536	11	57213036	1.618e-09	5	4
4	1	1	6:23909811:A:C	rs481314	6	23909811	3.351e-09	1	1
4	2	1	6:23942549:C:T	rs113004122	6	23942549	1.292e-08	8	1
4	3	1	6:23960520:A:G	rs117379952	6	23960520	6.353e-53	1	1
4	4	1	6:24026095:A:G	rs9356920	6	24026095	2.92e-10	4	1
4	5	1	6:24038537:A:G	rs71555121	6	24038537	1.199e-146	24	4
4	6	1	6:24140690:C:T	rs12196541	6	24140690	3.207e-165	25	1
4	7	1	6:24147572:A:G	rs3178	6	24147572	1.438e-11	4	1
4	8	1	6:24163814:A:G	rs61528653	6	24163814	4.702e-09	36	1
4	9	1	6:24169966:A:C	rs148847524	6	24169966	8.173e-290	17	1
4	10	1	6:24370358:C:T	rs793664	6	24370358	1.064e-11	18	2
4	11	1	6:24372995:A:G	rs138191414	6	24372995	2.806e-20	20	4
4	12	1	6:24391075:A:G	rs793676	6	24391075	2.686e-20	3	1
4	13	1	6:24429249:C:T	rs6942189	6	24429249	2.767e-24	29	3
4	14	1	6:24451256:A:G	rs6456614	6	24451256	1.476e-17	16	1
4	15	1	6:24463497:A:G	rs2793444	6	24463497	1.743e-16	48	1
4	16	1	6:24464511:G:T	rs2817244	6	24464511	2.828e-15	56	1
4	17	1	6:24476553:A:G	rs760904	6	24476553	1.436e-16	31	1
4	18	1	6:24502123:A:G	rs9467203	6	24502123	2.977e-18	47	1
4	19	1	6:24512589:A:G	rs79232381	6	24512589	1.998e-13	17	1
4	20	1	6:24526243:A:C	rs807518	6	24526243	3.442e-16	26	2
4	21	1	6:24549315:C:T	rs12197384	6	24549315	1.114e-11	1	1
4	22	1	6:24584181:C:T	rs6902039	6	24584181	3.315e-20	1	1
4	23	1	6:24585547:A:G	rs2760135	6	24585547	8.286e-20	21	2
4	24	1	6:24611493:A:G	rs7771169	6	24611493	5.684e-25	12	1
4	25	1	6:24654443:C:T	rs3181238	6	24654443	1.918e-12	5	1
4	26	1	6:24673620:A:G	rs7765052	6	24673620	2.12e-08	51	2
4	27	1	6:24753388:C:T	rs9393585	6	24753388	4.519e-12	23	2
4	28	1	6:24762836:A:T	rs2754772	6	24762836	1.369e-42	11	1
4	29	1	6:24770723:G:T	rs118125535	6	24770723	7.056e-108	20	2
4	30	1	6:24775181:G:T	rs2754775	6	24775181	1.522e-18	5	2
4	31	1	6:24789121:C:G	rs9366581	6	24789121	4.131e-11	11	1
4	32	1	6:24799327:C:G	rs139126471	6	24799327	3.091e-27	9	1
4	33	1	6:24818194:C:T	rs61528548	6	24818194	1.311e-28	1	1
4	34	1	6:24830306:C:G	rs56733961	6	24830306	7.399e-13	43	1
4	35	1	6:24848086:A:G	rs3813680	6	24848086	7.458e-16	3	1
4	36	1	6:24855224:C:T	rs4431425	6	24855224	2.739e-43	16	1
4	37	1	6:24881498:C:T	rs6930916	6	24881498	8.625e-25	13	1
4	38	1	6:24902113:A:G	rs2817726	6	24902113	1.187e-61	24	1
4	39	1	6:24916731:A:C	rs138093034	6	24916731	1.124e-08	32	5
4	40	1	6:24923930:A:C	rs430661	6	24923930	4.271e-32	3	1
4	41	1	6:24948146:A:G	rs1739316	6	24948146	5.773e-24	6	1
4	42	1	6:24951199:A:G	rs647297	6	24951199	7.284e-203	1	1
4	43	1	6:24951809:A:G	rs387628	6	24951809	7.511e-30	1	1
[truncated: 345 more rows]

## Sheet: S Table 6
Supplementary Table 6. Mapped genes for genetic clusters
Cluster	ensg	symbol	chr	start	end	strand	type	entrezID	HUGO	pLI	ncRVIS	posMapSNPs	posMapMaxCADD	eqtlMapSNPs	eqtlMapminP	eqtlMapminQ	eqtlMapts	eqtlDirection	minGwasP	IndSigSNPs	GenomicLocus
1*	ENSG00000145996	CDKAL1	6	20534688	21232635	1	protein_coding	54901	CDKAL1	0.57765	0.904338	24	7.947	0					9.677e-12	rs11970030;rs560003547	1
1*	ENSG00000233848	RP3-348I23.2	6	20756334	20800925	-1	antisense					5	2.849	0						rs11970030	1
1*	ENSG00000272168	CASC15	6	21665003	22214734	1	lincRNA	401237	CASC15			111	18.13	0					8.513e-30	rs560003547;rs190373994;rs56126921;rs72826303;rs11759616;rs6906731;rs7760082;rs11751260;rs17261487;rs2328662;rs141877826	1
1*	ENSG00000260049	RP3-404K8.2	6	22260653	22318027	1	antisense					4	5.154	0					3.006e-31	rs141877826;rs56126921;rs190373994;rs2655446	1
1*	ENSG00000233358	RP1-209A6.1	6	22744624	23032009	-1	lincRNA					33	14.7	0					2.269e-59	rs9358581;rs116631002;rs36029180	1
1*	ENSG00000152954	NRSN1	6	24126350	24155128	1	protein_coding	140767	NRSN1	0.00430725	1.41196	15	7.707	0					5.974e-182	rs73727537;rs12196541;rs3178;rs148847524;rs61528653;6:25003339	1
1*	ENSG00000146038	DCDC2	6	24171984	24358280	-1	protein_coding	51473	DCDC2	1.04849e-05	2.52398	187	19.69	0					3.58e-225	rs148847524;rs61528653;rs73727537;rs78612998;rs1622103;6:25003339;rs12196541;rs79134990;rs143231436;rs9393547;rs3846829;rs150895593;rs138191414;rs78120860;rs138093034;rs2753912;rs116730488	1
1*	ENSG00000202050	RNU6-391P	6	24365879	24365982	1	snRNA		RNU6-391P			1	1.976	0						rs73727537	1
1*	ENSG00000124532	MRS2	6	24403153	24425810	1	protein_coding	57380	MRS2	8.84583e-05	2.37027	90	14.89	174	3.13583e-18	1.6489e-13	GTEx/v8/Whole_Blood	+	3.485e-223	rs7754778;rs138093034;rs73727537;rs2273605;rs138191414;rs4646838;rs115894968;rs6456614;6:25003339;rs9467176	1
1*	ENSG00000112293	GPLD1	6	24424793	24495433	-1	protein_coding	2822	GPLD1	5.63948e-09	0.977323	273	12.49	41	4.2579e-07	0.00114471	GTEx/v8/Whole_Blood		4.355e-228	rs7754778;rs138191414;rs2273605;rs138093034;rs73727537;rs150895593;rs78120860;rs115894968;rs138711481;rs6456614;rs9467176;rs2817244;rs79232381;rs2744563;rs807514;rs9467203;rs7765052	1
1*	ENSG00000112294	ALDH5A1	6	24495080	24537435	1	protein_coding	7915	ALDH5A1	0.00290426	1.09363	98	23.6	303	1.46939e-23	1.91041e-18	GTEx/v8/Cells_EBV-transformed_lymphocytes:GTEx/v8/Whole_Blood	-	1.576e-136	rs79232381;rs9467203;rs2817244;rs807514;rs9467176;rs115894968;rs4646838;rs807531;rs7754778;rs2273605;rs6456614	1
1*	ENSG00000137261	KIAA0319	6	24544332	24646383	-1	protein_coding	9856	KIAA0319	7.95793e-12	1.6839	163	12.83	99	6.10558e-24	1.37987e-18	GTEx/v8/Whole_Blood	-	9.675e-282	rs115894968;rs807531;rs9467176;rs536104843;rs12197384;6:25003339;rs138191414;rs138093034;rs73727537;rs6902039;rs6915373;rs13204166;rs139126471;rs7771169;rs190550152;rs707887;rs116596225;rs7765052;rs3181238;rs56733961	1
1*	ENSG00000218186	KRT8P43	6	24598240	24600018	1	pseudogene		KRT8P43			2	7.25	85	1.61445e-10	1.16389e-06	GTEx/v8/Whole_Blood	-	9.188e-16	rs6915373;rs13204166;rs707887;rs3181238	1
1*	ENSG00000111802	TDP2	6	24650205	24667261	-1	protein_coding	51567	TDP2	0.000137008	0.245868	51	21.3	38	5.62002e-07	0.00138894	GTEx/v8/Whole_Blood	-	3.152e-102	rs116596225;rs707887;rs3087943;rs7765052;rs3181238	1
1*	ENSG00000112304	ACOT13	6	24667263	24705293	1	protein_coding	55856	ACOT13	3.4293e-05	0.981955	27	11.52	0					1.004e-90	rs7765052;rs116596225;rs3181238;rs139126471;rs60555264	1
1*	ENSG00000112308	C6orf62	6	24705089	24721064	-1	protein_coding	81688	C6orf62	0.946557	-0.70031	12	19.11	15	2.9546e-10	3.28504e-25	GTEx/v8/Cells_EBV-transformed_lymphocytes:GTEx/v8/Whole_Blood	-	8.578e-50	rs116596225;rs7765052;rs190550152;rs6941866;rs707887;rs3181238;rs3813680	1
1*	ENSG00000224164	RP3-369A17.4	6	24742530	24752149	1	lincRNA					2	1.639	0						rs6941866	1
1*	ENSG00000112312	GMNN	6	24775159	24786327	1	protein_coding	51053	GMNN	0.607454	0.172626	26	18.9	0					7.219e-70	rs1980643;rs73396439;rs2493333;rs9366581	1
1*	ENSG00000260286	C6orf229	6	24797549	24799117	-1	protein_coding	101928603	C6orf229			2	18.32	34	6.33951e-06	0.00346305	GTEx/v8/Whole_Blood	+	2.064e-65	rs2754772;rs73396439;rs56733961	1
1*	ENSG00000111913	FAM65B	6	24797601	25042238	-1	protein_coding	9750	FAM65B	0.97131	0.949896	383	22.6	12	9.72209e-08	4.25718e-05	GTEx/v8/Whole_Blood	+	1.258e-302	rs2754772;rs73396439;rs2493333;rs139126471;rs56733961;rs79868980;rs10946731;rs3813680;6:25003339;rs138093034;rs4431425;rs6930916;rs2817726;rs150895593;rs55927112;rs13202601;rs1739316;rs647297;rs387628;rs386732;rs9348651;rs117518521;rs61176793;rs9356958;rs302988	1
1*	ENSG00000217083	RP1-245M18.2	6	24948108	24948572	1	pseudogene					3	12.84	0					1.154e-24	rs1739316	1
1*	ENSG00000214975	PPIAP29	6	24976647	24977210	1	pseudogene		PPIAP29			2	12.3	4	6.04411e-11	2.26741e-13	GTEx/v8/Whole_Blood	+	1.554e-92	rs139126471;rs9348651;rs55927112;rs647297	1
1*	ENSG00000272053	RP11-367G6.3	6	25015180	25042398	-1	lincRNA					68	17.71	111	8.65568e-15	3.07676e-11	GTEx/v8/Whole_Blood	-	1.348e-130	rs9356958;rs61176793;rs117518521;rs302988;rs16890032	1
1*	ENSG00000220517	ASS1P1	6	25023475	25024711	-1	pseudogene		ASS1P1			5	9.656	0						rs9356958;rs61176793	1
1*	ENSG00000244618	RN7SL334P	6	25031243	25031510	-1	misc_RNA		RN7SL334P			1	0.301	0						rs61176793	1
1*	ENSG00000229313	RP3-425P12.5	6	25042067	25056892	1	antisense					4	7.846	0						rs302988	1
1*	ENSG00000230372	RP3-425P12.2	6	25061853	25063735	-1	lincRNA					2	4.552	0						rs302988;rs16890032	1
1*	ENSG00000168405	CMAHP	6	25081548	25166793	-1	pseudogene	8418	CMAHP			112	17.41	4	7.93095e-05	4.38189e-10	GTEx/v8/Whole_Blood		7.349e-254	rs16890032;rs143743502;rs302988;rs3749873;rs59401719;rs2690059	1
1*	ENSG00000219682	RP3-425P12.4	6	25140212	25141649	1	pseudogene					1	10.54	0					7.349e-254	rs3749873	1
1*	ENSG00000235733	RP3-522P13.3	6	25245584	25261639	-1	antisense	101928663				15	6.36	0						rs9393632;6:25329362	1
1*	ENSG00000213972	RP3-522P13.2	6	25272428	25273979	-1	pseudogene					6	19.71	0						rs9358849;rs78904078	1
1*	ENSG00000079691	LRRC16A	6	25279306	25620758	1	protein_coding	55604	LRRC16A	0.502319	0.400707	684	16.87	101	5.26709e-29	1.36744e-31	GTEx/v8/Cells_EBV-transformed_lymphocytes:GTEx/v8/Whole_Blood	-	3.329e-251	rs78904078;rs2690112;rs9358849;rs6936496;rs2690123;rs10456320;rs117115513;6:25329362;rs2744306;rs2690059;rs11754685;rs2744227;rs12663563;rs6456671;rs142089862;rs77016882;rs76513426;rs4711082;rs2182931;rs190550152;rs147645822;rs16890551;rs9461153;rs75673308;rs12201737;rs927986;rs146458991;rs1927693;rs9366624;rs56293509;rs11752825;rs576904363;rs62392388;rs75650328;rs12213948;rs72831251;rs76417859;r…	1
1*	ENSG00000207490	RNU6-987P	6	25383827	25383930	1	snRNA		RNU6-987P			2	4.83	0						rs16890551	1
1*	ENSG00000238322	snoU13	6	25435508	25435590	1	snoRNA					2	4.637	0					6.624e-52	rs76417859;rs76448003	1
1*	ENSG00000079689	SCGN	6	25652464	25702011	1	protein_coding	10590	SCGN	0.035946	0.102936	54	11.9	0					1.807e-256	rs941428;rs9393654;rs932316;rs142089862;6:25329362;rs6924948;rs76772871;rs191929921;rs6456691;rs76703022;rs118006439	1
1*	ENSG00000217408	PRELID1P2	6	25678997	25679392	-1	pseudogene		PRELID1P2			1	9.322	0						rs9393654	1
1*	ENSG00000146047	HIST1H2BA	6	25727137	25727573	1	protein_coding	255626	HIST1H2BA	0.132824	0.401921	2	3.535	0					4.618e-29	rs191929921;rs6456691	1
1*	ENSG00000146039	SLC17A4	6	25754927	25781419	1	protein_coding	10050	SLC17A4	6.33423e-06	0.944836	13	9.141	0					2.067e-19	rs6456691;rs191929921;rs80230923;rs9393668	1
1*	ENSG00000124568	SLC17A1	6	25783125	25832287	-1	protein_coding	6568	SLC17A1	2.59261e-10	-0.181263	8	12.38	0					1.875e-226	rs9393668;rs717551;rs140387790;rs116956053	1
1*	ENSG00000124564	SLC17A3	6	25833294	25882514	-1	protein_coding	10786	SLC17A3	9.88206e-14	-0.246503	16	8.847	0					7.905e-224	rs9295676;rs9393668;rs118006439;rs717551;rs142089862	1
1*	ENSG00000112337	SLC17A2	6	25912982	25930946	-1	protein_coding	10246	SLC17A2	0.00466985	-0.129201	26	16.41	0					1.434e-291	rs9295676;rs6907991;rs72830103	1
1*	ENSG00000112343	TRIM38	6	25963030	25987384	1	protein_coding	10475	TRIM38	4.7513e-06	-0.220583	20	35	55	1.1022e-13	2.71219e-11	GTEx/v8/Cells_EBV-transformed_lymphocytes:GTEx/v8/Whole_Blood	-	3.241e-62	rs113936133;rs12210098;rs9295676;rs6907991;rs549696721;rs9366637;rs72830103;rs9393654;rs4145878;rs3925875	1
1*	ENSG00000272558	U91328.21	6	25984040	25999395	-1	antisense					11	9.7	0						rs12210098;rs113936133;rs9366637;rs9295676;rs72830103;rs6907991	1
1*	ENSG00000272065	U91328.20	6	25990989	25991454	1	lincRNA					1	0.383	0						rs113936133	1
1*	ENSG00000272462	U91328.19	6	25992890	26002003	1	lincRNA					6	9.7	102	5.37289e-10	2.19136e-09	GTEx/v8/Cells_EBV-transformed_lymphocytes:GTEx/v8/Whole_Blood	-	2.518e-77	rs6907991;rs113936133;rs12210098;rs717551;rs72834629;rs6934330;rs76703022;rs9295676	1
1*	ENSG00000272810	U91328.22	6	26013469	26013985	1	lincRNA					2	5.131	2	0.000218697	0.00933253	GTEx/v8/Whole_Blood			rs72834629;rs113936133;rs12207674;rs932316	1
1*	ENSG00000198366	HIST1H3A	6	26020718	26021186	1	protein_coding	8968	HIST1H3A	3.98008e-05	-0.225707	3	27.1	0						rs113936133;6:25329362	1
1*	ENSG00000196176	HIST1H4A	6	26021907	26022278	1	protein_coding	554313	HIST1H4A	0.0022854	0.43417	1	15.82	0						rs113936133	1
1*	ENSG00000124693	HIST1H3B	6	26031817	26032288	-1	protein_coding	8968	HIST1H3B	0.307283	0.251696	1	0.631	0						rs142089862	1
1*	ENSG00000196226	HIST1H2BB	6	26043455	26043885	-1	protein_coding	3018	HIST1H2BB	0.130328	0.288117	1	22.3	0						rs142089862	1
1*	ENSG00000196532	HIST1H3C	6	26045639	26046097	1	protein_coding	8968	HIST1H3C	0.215541	-0.193879	1	0.084	0					4.498e-290	rs9366637	1
1*	ENSG00000187837	HIST1H1C	6	26055968	26056699	-1	protein_coding	3006	HIST1H1C		0.137228	4	24.4	0						rs72834629;rs142089862;rs113936133;rs9366637	1
1*	ENSG00000010704	HFE	6	26087509	26098571	1	protein_coding	3077	HFE	8.49697e-07	0.210172	9	12.81	0					2.742e-297	rs113936133;rs9366637;rs198846;rs72830103;rs72834629;rs549696721	1
1*	ENSG00000197061	HIST1H4C	6	26104104	26104518	1	protein_coding	554313	HIST1H4C	8.85617e-05	0.852192	1	13.32	0						rs72834629	1
1*	ENSG00000187475	HIST1H1T	6	26107640	26108364	-1	protein_coding	3010	HIST1H1T		-0.0680391	1	15.9	0						rs9366637	1
1*	ENSG00000180596	HIST1H2BC	6	26115101	26124154	-1	protein_coding	8347	HIST1H2BC	0.00287801	0.335736	10	11.84	0						rs72834629;rs198846;rs72830103;rs142089862;rs9366637	1
1*	ENSG00000180573	HIST1H2AC	6	26124373	26139344	1	protein_coding	8334	HIST1H2AC	0.599176	0.739679	22	7.929	0						rs198846;rs72834629;rs9366637;rs117965842	1
1*	ENSG00000168298	HIST1H1E	6	26156559	26157343	1	protein_coding	3008	HIST1H1E		-0.396522	1	14.79	0						rs142089862	1
1*	ENSG00000158373	HIST1H2BD	6	26158349	26171577	1	protein_coding	3017	HIST1H2BD	0.000277979	-0.0152977	2	12.56	54	1.90966e-08	1.38108e-21	GTEx/v8/Whole_Blood	-	1.633e-225	rs142344691;rs9393654;rs72834629;rs80292109;rs4145878;rs55964643;rs12201802;rs12201159	1
1*	ENSG00000197697	HIST1H2BE	6	26183958	26184454	1	protein_coding	8347	HIST1H2BE	0.000307872	0.445738	2	22.4	0						rs113507773;rs80292109	1
1*	ENSG00000188987	HIST1H4D	6	26188938	26189304	-1	protein_coding	554313	HIST1H4D	0.0022643	0.870145	1	23.3	0						rs142089862	1
1*	ENSG00000197409	HIST1H3D	6	26197068	26199521	-1	protein_coding	8968	HIST1H3D	0.0111951		5	15.88	0					1.439e-22	rs4145878;rs113507773;rs77926209	1
1*	ENSG00000196866	HIST1H2AD	6	26199079	26199471	-1	protein_coding	3013	HIST1H2AD	3.99677e-05	0.287759	1	10.39	0						rs77926209	1
1*	ENSG00000197846	HIST1H2BF	6	26199748	26200942	1	protein_coding	8347	HIST1H2BF	0.00030002	0.851063	4	21.1	0						rs4145878;rs77926209;rs80292109;rs144465147	1
1*	ENSG00000198518	HIST1H4E	6	26204858	26206266	1	protein_coding	554313	HIST1H4E	0.000642251	1.83578	5	12.74	0					2.382e-74	rs77926209;rs4145878;rs9393687	1
1*	ENSG00000187990	HIST1H2BG	6	26216428	26216872	-1	protein_coding	8347	HIST1H2BG	2.94452e-06	0.0253452	2	18.71	0						rs77926209;rs113507773	1
1*	ENSG00000218281	HIST1H2APS3	6	26233350	26233483	1	pseudogene		HIST1H2APS3			1	3.863	0						rs80292109	1
1*	ENSG00000124575	HIST1H1D	6	26234440	26235216	-1	protein_coding	3007	HIST1H1D		0.136123	1	8.603	0						rs77926209	1
1*	ENSG00000198327	HIST1H4F	6	26240561	26240976	1	protein_coding	554313	HIST1H4F	0.181985	1.06312	2	10.94	0						rs113507773;rs77926209	1
1*	ENSG00000124578	HIST1H4G	6	26246886	26247259	-1	protein_coding	8369	HIST1H4G	0.00263	-0.0509409	1	12.55	0						rs113507773	1
1*	ENSG00000158406	HIST1H4H	6	26281283	26285762	-1	protein_coding	554313	HIST1H4H	0.00879033	1.05907	4	14.98	45	5.30765e-07	6.31015e-06	GTEx/v8/Whole_Blood	-	1.633e-225	rs113218058;rs4145878;rs80292109	1
1*	ENSG00000220875	HIST1H3PS1	6	26322104	26322520	-1	pseudogene		HIST1H3PS1			1	10.86	0						rs80292109	1
1*	ENSG00000186470	BTN3A2	6	26365387	26378546	1	protein_coding	11118	BTN3A2	0.000124519	2.20791	6	1.829	528	1.92398e-24	4.18669e-117	GTEx/v8/Cells_EBV-transformed_lymphocytes:GTEx/v8/Whole_Blood	+	3.078e-254	rs2073526;rs12201159;rs56293509;rs12213948;rs6934330;rs301374;rs214066;rs9393654;rs4145878;rs55964643;rs12201802;rs9295689;rs3925875;rs2130655;rs1102565;rs2092114;rs9368503	1
1*	ENSG00000124508	BTN2A2	6	26383324	26395102	1	protein_coding	10385	BTN2A2	0.000150288	1.01572	3	3.655	2	9.93408e-05	0.000225756	GTEx/v8/Whole_Blood			rs9295689;rs2073526;rs12201802;rs184466620	1
1*	ENSG00000026950	BTN3A1	6	26402465	26415444	1	protein_coding	11119	BTN3A1	8.65114e-07	1.62791	9	6.567	18	3.04233e-09	7.84799e-09	GTEx/v8/Whole_Blood		2.715e-37	rs12201802;rs1796519;rs12201159;6:26410486;rs9295689;rs2073526	1
1*	ENSG00000124549	BTN2A3P	6	26421619	26432611	1	pseudogene	54718	BTN2A3P			7	12.45	7	1.02053e-06	0.00133434	GTEx/v8/Whole_Blood	-	2.715e-37	rs9295689;rs2073526;rs12201802;rs12201159;rs181617193;rs1796519	1
1*	ENSG00000111801	BTN3A3	6	26440700	26453643	1	protein_coding	10384	BTN3A3	7.19025e-10	1.09011	8	5.469	0					2.93e-26	rs188713930;rs12201802;rs144465147;rs575185218;rs1796519;rs181617193;rs9295689	1
1*	ENSG00000112763	BTN2A1	6	26458150	26476849	1	protein_coding	11120	BTN2A1	1.07468e-18	0.260571	11	11.27	155	9.2685e-17	2.124e-50	GTEx/v8/Whole_Blood	-	1.103e-237	6:26410486;rs144465147;rs575185218;rs12201802;rs12201159;rs9295689;rs1796519;rs148071656;rs2073526;rs3925875	1
1*	ENSG00000124557	BTN1A1	6	26501449	26510650	1	protein_coding	696	BTN1A1	1.14088e-09	-0.329705	12	12.08	0					8.642e-164	rs9295689;rs12201159	1
1*	ENSG00000228223	HCG11	6	26522076	26526807	1	lincRNA	493812	HCG11			4	15.79	33	5.6722e-08	0.00011446	GTEx/v8/Whole_Blood	-	9.576e-26	rs9295689;rs3999347	1
1*	ENSG00000261353	CTA-14H9.5	6	26527291	26527632	1	lincRNA					1	2.03	0						rs9295689	1
1*	ENSG00000182952	HMGN4	6	26538633	26546482	1	protein_coding	10473	HMGN4	0.557082	-0.351003	11	13.36	452	1.14488e-43	2.51544e-34	GTEx/v8/Cells_EBV-transformed_lymphocytes:GTEx/v8/Whole_Blood	+	3.078e-254	rs9295689;rs12201802;rs12201159;rs1796519;rs113507773;rs4145878;rs77926209;rs2073526;rs3925875;rs3999347;rs1102565;rs2092114;rs2294480	1
1*	ENSG00000146109	ABT1	6	26597180	26600278	1	protein_coding	29777	ABT1	0.0271056	0.104221	4	11.37	272	4.72896e-10	4.15662e-17	GTEx/v8/Cells_EBV-transformed_lymphocytes:GTEx/v8/Whole_Blood	-	1.556e-305	rs3925875;rs2130655;rs12201159;rs12201802;rs187242505;rs1102565;rs9348762	1
1*	ENSG00000218346	VN1R14P	6	26630782	26632007	-1	pseudogene		VN1R14P			2	4.525	0						rs2130655;rs12201159;rs3925875	1
1*	ENSG00000233631	RP11-457M11.2	6	26634611	26637008	-1	3prime_overlapping_ncrna					2	13.6	0						rs3925875	1
1*	ENSG00000181315	ZNF322	6	26636518	26659980	-1	protein_coding	79692	ZNF322		-1.14047	25	13.43	225	1.6084e-21	1.08836e-20	GTEx/v8/Cells_EBV-transformed_lymphocytes:GTEx/v8/Whole_Blood	-	3.078e-254	rs3925875;rs2130655;rs12201159;6:26410486;rs3999347;rs138644763;6:26896918;rs1796519;rs9295689;rs1102565;rs2073526	1
1*	ENSG00000261584	RP11-457M11.5	6	26686469	26688192	1	lincRNA	101929855				2	9.42	0						rs2130655;rs187242505;rs12201159	1
1*	ENSG00000241549	GUSBP2	6	26839263	26924333	-1	pseudogene	387036	GUSBP2			233	13.29	44	2.86365e-22	3.88665e-16	GTEx/v8/Cells_EBV-transformed_lymphocytes:GTEx/v8/Whole_Blood	-	3.078e-254	rs3925875;rs187242505;rs2130655;rs12201159;rs3999347;rs181617193;rs144465147;6:26896918;rs1102565;rs115912638;rs1796519	1
1*	ENSG00000243307	RP11-239L20.3	6	26864731	26866556	1	pseudogene					2	12.35	0						rs187242505;rs2130655;rs12201159;rs144465147	1
1*	ENSG00000224843	LINC00240	6	26924771	26991703	1	lincRNA	100133205	LINC00240			132	13.96	0					5.017e-200	rs3999347;rs12201159;rs3925875;rs1102565;rs139484815;rs115912638;6:26410486	1
1*	ENSG00000220581	VN1R12P	6	27001214	27002089	-1	pseudogene		VN1R12P			4	11.13	0						rs3925875;rs1102565;rs12201159	1
1*	ENSG00000219770	VN1R11P	6	27051059	27051926	1	pseudogene		VN1R11P			2	5.129	0					1.179e-10	rs12201159;rs144465147;rs575185218	1
1*	ENSG00000272468	RP1-86C11.7	6	27090436	27091000	-1	lincRNA					0	0	89	1.83397e-05	0.00496354	GTEx/v8/Whole_Blood	-	2.849e-22	rs113507773;rs113218058	1
1*	ENSG00000124635	HIST1H2BJ	6	27093676	27100541	-1	protein_coding	8970	HIST1H2BJ	0.478842	0.308582	7	17.79	29	4.00453e-05	0.0125512	GTEx/v8/Whole_Blood		6.724e-17	rs12201159;rs3925875;rs1102565;rs115912638	1
1*	ENSG00000197903	HIST1H2BK	6	27106073	27114619	-1	protein_coding	85236	HIST1H2BK	0.490754	-0.0430523	4	10.61	324	1.63987e-10	4.41227e-07	GTEx/v8/Whole_Blood	+	1.556e-305	rs12201159;rs12201802;rs2130655;rs187242505;rs1102565;rs3925875;rs9348762;rs2092114;rs142970147	1
1*	ENSG00000184825	HIST1H2AH	6	27114861	27115317	1	protein_coding	85235	HIST1H2AH	6.29508e-05	0.19492	1	16.39	0						rs12201159	1
1*	ENSG00000174572	RP11-209A2.1	6	27179023	27179692	1	pseudogene					2	10.97	0						rs12201159	1
1*	ENSG00000112812	PRSS16	6	27215480	27224403	1	protein_coding	10279	PRSS16	2.23792e-06	0.00884812	3	5.057	181	2.73235e-07	1.41935e-05	GTEx/v8/Whole_Blood	-	1.419e-246	rs2092114;rs1102565;rs12201159;rs3925875	1
1*	ENSG00000270935	XXbac-BPGBPG24O18.1	6	27235892	27237008	1	pseudogene					1	0.947	0						rs2092114	1
1*	ENSG00000158553	POM121L2	6	27253682	27279949	-1	protein_coding	94026	POM121L2		0.313408	30	14.01	0					1.456e-17	rs12201159;rs2092114;rs149260225;6:26410486;rs181617193;rs138644763;rs144465147;rs575185218;rs151312243	1
1*	ENSG00000204789	ZNF204P	6	27325604	27339304	-1	pseudogene	7754	ZNF204P			7	13.33	10	1.07976e-05	0.0184877	GTEx/v8/Cells_EBV-transformed_lymphocytes:GTEx/v8/Whole_Blood			rs9368503;rs573149595;rs12201159;rs2235359;rs112421807	1
1*	ENSG00000124613	ZNF391	6	27342394	27371683	1	protein_coding	346157	ZNF391	9.25869e-07	1.23172	13	12.79	64	3.21946e-15	3.18104e-24	GTEx/v8/Whole_Blood	-	3.409e-55	rs9379966;rs573149595;rs9368503;rs139484815;rs74328437;rs144465147;rs575185218;rs2092114;rs2294480;rs9368537;rs115397636;rs184084677;rs7739332	1
1*	ENSG00000271755	RP1-153G14.4	6	27371789	27374743	-1	lincRNA					1	0.299	0						rs149260225	1
1*	ENSG00000096654	ZNF184	6	27418522	27440897	-1	protein_coding	7738	ZNF184	0.133749	-0.545662	3	6.102	0						rs117453392;rs9368503;rs74328437	1
1*	ENSG00000219738	XXbac-BPG34I8.3	6	27528601	27529523	-1	pseudogene					1	0.248	0						rs2294480	1
1*	ENSG00000238648	TRNAI6	6	27599188	27599311	1	miRNA		TRNAI6			1	6.48	0						rs142970147	1
1*	ENSG00000216676	RP1-15D7.1	6	27620381	27620604	-1	pseudogene					1	6.587	0						rs142970147	1
1*	ENSG00000216915	RP1-97D16.1	6	27704779	27706273	-1	pseudogene					1	3.353	0						rs2294480	1
1*	ENSG00000233822	HIST1H2BN	6	27806323	27823487	1	protein_coding	8341	HIST1H2BN	0.139775	0.145508	5	2.845	0					1.38e-23	6:28325571;rs149878;rs150397879	1
1*	ENSG00000184357	HIST1H1B	6	27834570	27835359	-1	protein_coding	3009	HIST1H1B	0.509139	-0.0898951	1	12.12	0						rs9368537	1
1*	ENSG00000197153	HIST1H3J	6	27858093	27860884	-1	protein_coding	8968	HIST1H3J	0.695884	-0.189708	5	21.5	0						rs9368537;rs2294480;rs149878;rs144465147;rs575185218	1
1*	ENSG00000233224	HIST1H2AM	6	27860477	27860963	-1	protein_coding	85235	HIST1H2AM	0.000856482	-0.225135	1	9.3	0						rs144465147;rs575185218	1
1*	ENSG00000168131	OR2B2	6	27878963	27880174	-1	protein_coding	81697	OR2B2	6.8672e-05	-0.212076	2	23.2	0					4.68e-106	rs117680617;rs9368537	1
1*	ENSG00000124657	OR2B6	6	27925019	27925960	1	protein_coding	26212	OR2B6	0.0407309	-0.0981731	3	18.72	0						rs115397636;rs9368537	1
1*	ENSG00000217315	OR2W2P	6	28001725	28002633	1	pseudogene		OR2W2P			3	16.02	0						rs184084677;rs9368537	1
1*	ENSG00000187763	OR2B7P	6	28014212	28015145	1	pseudogene		OR2B7P			3	15.46	0						rs9368537;rs184084677;rs169431	1
1*	ENSG00000182477	OR2B8P	6	28021006	28021943	-1	pseudogene		OR2B8P			1	14.64	0						rs169431	1
1*	ENSG00000220721	OR1F12	6	28041094	28042011	1	pseudogene		OR1F12			3	18.45	0					1.246e-45	rs184084677;rs77396427;rs7739332	1
1*	ENSG00000272009	RP1-313I6.12	6	28046570	28048908	-1	antisense					5	11.69	0					3.394e-124	rs169431;rs148672491;rs115397636;rs184084677	1
1*	ENSG00000197279	ZNF165	6	28048753	28057341	1	protein_coding	7718	ZNF165	0.000563292	0.227981	2	9.489	0						rs184084677;rs76033823	1
1*	ENSG00000219891	ZSCAN12P1	6	28058932	28061442	1	pseudogene	221584	ZSCAN12P1			2	6.088	131	1.38285e-07	0.000213091	GTEx/v8/Whole_Blood	-	6.449e-223	rs7739332;rs184084677;rs12201159;rs2294480;rs142970147;rs149878;rs169431;rs1150678;rs34024998;rs213232	1
1*	ENSG00000219392	RP1-265C24.5	6	28083406	28084329	1	pseudogene					0	0	101	1.62157e-09	2.61906e-08	GTEx/v8/Cells_EBV-transformed_lymphocytes:GTEx/v8/Whole_Blood	+	1.258e-178	rs169431;rs1150678;rs139614182;rs2294480;rs149878;rs12206581;rs6939576;rs7745220	1
1*	ENSG00000269293	ZSCAN16-AS1	6	28089573	28105071	-1	antisense	100129195	ZSCAN16-AS1			15	9.468	152	3.78121e-06	0.00310739	GTEx/v8/Whole_Blood	+	1.075e-155	rs169431;rs184084677;rs117315101;rs79777367;rs148472072;rs139057698;rs7739332;rs151327481;rs117453392;rs151080251;rs1150678;rs7745220;rs115397636	1
1*	ENSG00000196812	ZSCAN16	6	28092338	28097860	1	protein_coding	80345	ZSCAN16	2.67303e-06	0.184187	6	6.172	0						rs169431;rs7739332;rs151327481;rs117453392;rs184084677	1
1*	ENSG00000261839	RP1-265C24.8	6	28104627	28107456	1	lincRNA					3	8.65	0					5.21e-16	rs7739332;rs117680617;rs184084677	1
1*	ENSG00000198315	ZKSCAN8	6	28109688	28127250	1	protein_coding	7745	ZKSCAN8	0.000231595	-0.142528	18	16.11	0					5.049e-124	rs184084677;rs169431;rs7739332;rs139494877;rs151080251;rs79777367	1
1*	ENSG00000226314	ZNF192P1	6	28129559	28137372	1	pseudogene	651302	ZNF192P1			3	13.34	133	2.38123e-08	0.000245334	GTEx/v8/Cells_EBV-transformed_lymphocytes:GTEx/v8/Whole_Blood	+	6.449e-223	rs184084677;rs144465147;rs575185218;rs7739332;rs12000;rs2235359;rs213232;rs74967533;rs112421807;rs12206581	1
1*	ENSG00000216901	AL022393.7	6	28143966	28144452	1	pseudogene					0	0	211	4.53196e-10	1.19994e-06	GTEx/v8/Cells_EBV-transformed_lymphocytes	+	6.449e-223	rs2294480;rs149878;rs7739332;rs184084677;rs12000;rs2235359;rs112421807;rs34024998;rs213232;rs74967533;rs9257158;rs3131088	1
1*	ENSG00000176933	TOB2P1	6	28185421	28186655	-1	pseudogene	222699	TOB2P1			3	11.28	13	6.90656e-06	0.019718	GTEx/v8/Cells_EBV-transformed_lymphocytes	-	2.478e-08	rs12000;rs151080251	1
1*	ENSG00000137185	ZSCAN9	6	28192664	28201260	1	protein_coding	7746	ZSCAN9	4.10249e-08	0.461166	6	9.47	622	4.82344e-08	4.14105e-21	GTEx/v8/Whole_Blood	-	6.449e-223	rs77396427;rs74967533;rs34024998;rs115397636;rs2235359;rs2092114;rs2294480;rs149878;rs169431;rs12000;rs213232;rs12206581;rs62402390;rs9257158;rs3131088;rs209127;rs112421807;rs9257745;rs7754926;rs41316618;rs3117340	1
1*	ENSG00000187626	ZKSCAN4	6	28212401	28227011	-1	protein_coding	387032	ZKSCAN4	6.74288e-05	0.661631	13	13.14	27	0.000147502	0.002225	GTEx/v8/Whole_Blood		8.021e-90	rs2235359;rs12000;rs74967533;rs149704780;rs559061440;rs151080251;rs149204020;rs180803647;rs9368537;rs62402390;rs2859356;rs12206581;rs112421807;rs7745220;rs9257745	1
1*	ENSG00000189134	NKAPL	6	28227098	28228736	1	protein_coding	222698	NKAPL	0.000165621	0.0513426	2	11.8	41	0.000628289	0.00118655	GTEx/v8/Whole_Blood		6.479e-183	rs12000;rs34024998	1
1*	ENSG00000197062	RP5-874C20.3	6	28234788	28245974	1	pseudogene					9	10.25	248	7.00964e-10	3.23912e-06	GTEx/v8/Whole_Blood	+	6.449e-223	rs2235359;rs74967533;rs12000;rs180803647;rs213232;rs2294480;rs149878;rs9368537;rs169431;rs1150678;rs34024998;rs12206581;rs7763390;rs3131088	1
1*	ENSG00000137338	PGBD1	6	28249314	28270326	1	protein_coding	84547	PGBD1	1.46735e-05	-0.0800605	34	13	0					1.317e-20	rs113710928;rs213232;rs2235359;rs74967533;rs112421807;rs142154697;rs151327481;rs117453392;rs148672491	1
1*	ENSG00000235109	ZSCAN31	6	28292470	28324048	-1	protein_coding	64288	ZSCAN31	3.77127e-09	1.10713	39	23.1	0					2.838e-167	rs213232;rs74967533;rs151080251;rs12000;rs2235359;rs139614182;rs139494877;rs149704780;rs559061440;rs113710928	1
1*	ENSG00000189298	ZKSCAN3	6	28317691	28336947	1	protein_coding	80317	ZKSCAN3	0.000122608	-0.652443	28	10.77	15	1.14852e-05	0.00669039	GTEx/v8/Whole_Blood		6.449e-223	rs559061440;rs12000;rs2235359;rs213232;6:28325571;rs139614182;rs113710928;rs151080251;rs34024998;rs148672491;rs74967533;rs9368537;rs2859356;rs12206581	1
1*	ENSG00000158691	ZSCAN12	6	28346732	28367511	-1	protein_coding	9753	ZSCAN12	1.43992e-05		28	14.91	0					1.626e-182	rs34024998;rs213232;rs77396427;rs142154697;rs139614182;rs139484815;rs145263686;rs74967533	1
1*	ENSG00000187987	ZSCAN23	6	28399707	28411279	-1	protein_coding	222696	ZSCAN23	0.00270295	0.0706565	9	11.23	144	5.25709e-17	3.17711e-11	GTEx/v8/Cells_EBV-transformed_lymphocytes	+	6.449e-223	rs213232;rs34024998;rs2294480;rs149878;rs2859356	1
1*	ENSG00000198704	GPX6	6	28471073	28495992	-1	protein_coding	257202	GPX6	3.13758e-05	0.718703	36	9.03	0					6.323e-51	rs62402390;rs2859356;rs183719819;6:28713434;rs148672491;rs148656136;rs181752128;rs115397636	1
1*	ENSG00000224586	GPX5	6	28493702	28502729	1	protein_coding	2880	GPX5	0.00888468	0.354876	12	11.29	0					7.031e-43	rs2859356;rs62402390;rs115397636;rs571726149	1
1*	ENSG00000232040	SCAND3	6	28539407	28583989	-1	protein_coding	114821	SCAND3	9.70724e-09	-0.785031	38	17.99	0					6.402e-117	rs12206581;rs62402390;rs139614182;rs139494877;rs115397636;rs148672491;rs142154697;rs117315101;rs145263686;rs181075692;rs181752128	1
1*	ENSG00000246350	RP5-1186N24.3	6	28555155	28559524	1	processed_transcript					6	8.855	0					1.606e-14	rs12206581;rs117315101	1
1*	ENSG00000271440	RP11-373N24.2	6	28601158	28601371	-1	pseudogene					1	4.233	0						rs12206581	1
1*	ENSG00000235570	LINC00533	6	28616063	28616843	-1	lincRNA		LINC00533			1	8.237	0						rs62402390;rs2859356	1
1*	ENSG00000237425	RPSAP2	6	28699794	28700681	1	pseudogene		RPSAP2			4	7.271	0						rs9257158;rs9257182	1
1*	ENSG00000235559	NOL5BP	6	28751410	28751781	-1	pseudogene					1	7.325	0						rs9257158;rs3131088	1
1*	ENSG00000265764	AL662890.3	6	28763749	28763812	-1	miRNA					1	13.15	0						rs112421807	1
1*	ENSG00000225173	XXbac-BPG308K3.5	6	28805646	28806783	-1	lincRNA					4	19.56	0						rs9257158;rs3131088;rs209127;rs151080251;rs7745220	1
1*	ENSG00000225595	XXbac-BPG308K3.6	6	28827402	28832407	-1	lincRNA	401242				9	9.484	0						rs112421807;rs7745220;rs209127;rs115397636;rs3131088;rs145263686	1
1*	ENSG00000213916	RPL13P	6	28829193	28829824	1	pseudogene		RPL13P			2	9.484	0						rs7745220;rs209127	1
1*	ENSG00000233366	ZNF90P2	6	28856609	28857683	-1	pseudogene		ZNF90P2			1	0.679	0						rs3131088	1
1*	ENSG00000224157	HCG14	6	28864307	28865099	1	antisense	414760	HCG14			1	7.114	0						rs3131088	1
1*	ENSG00000204713	TRIM27	6	28870779	28891766	-1	protein_coding	5987	TRIM27	0.878752	-0.142068	56	14.41	1595	1.32351e-55	2.45143e-43	GTEx/v8/Whole_Blood	+	1.376e-261	rs7745220;rs3131088;rs209127;rs4599679;rs41316602;rs117846312;rs12055619;6:28713434;rs115397636;rs139494877;rs181752128;rs112421807;rs143256812;rs180803647;rs149878;rs184084677;rs7739332;rs12000;rs2235359;rs34024998;rs213232;rs74967533;rs151080251;rs139614182;rs62402390;rs2859356;rs12206581;rs6939576;rs9257182;rs9257158;rs41316618;rs7763390;rs7754926;rs3117340;rs9283885;rs145263686;rs35095140;rs7…	1
1*	ENSG00000204709	C6orf100	6	28911654	28912314	1	protein_coding		C6orf100			4	32	22	4.99193e-05	0.0181715	GTEx/v8/Cells_EBV-transformed_lymphocytes			rs142445164;rs3131088;rs9257158;rs209127;rs7745220;rs213232	1
1*	ENSG00000228666	KRT18P1	6	28936907	28938237	-1	pseudogene		KRT18P1			1	1.554	0						rs151080251	1
1*	ENSG00000263426	RN7SL471P	6	28945252	28945547	1	misc_RNA		RN7SL471P			2	9.895	0						rs7754926;rs41316618;rs3117340	1
1*	ENSG00000227214	HCG15	6	28953980	28955261	1	antisense		HCG15			1	5.607	0						rs112421807	1
1*	ENSG00000244349	HCG16	6	28954577	28956313	1	antisense	101929874	HCG16			1	2.391	0						rs3131088	1
1*	ENSG00000197935	ZNF311	6	28962562	28973093	-1	protein_coding	282890	ZNF311	0.000129446	0.377858	20	10.88	0						rs3131088;rs7745220;rs112421807;rs3117340;rs7754926;rs41316618;rs9283885;rs9257745	1
1*	ENSG00000223677	OR2AD1P	6	28994457	28995384	-1	pseudogene		OR2AD1P			3	15.34	0					1.981e-38	rs9283885;rs4599679;rs3117340	1
1*	ENSG00000204704	OR2W1	6	29011990	29013017	-1	protein_coding	26692	OR2W1	0.0865619	0.531528	2	25.2	0						rs3117340	1
1*	ENSG00000236909	OR2P1P	6	29039601	29040376	-1	pseudogene		OR2P1P			4	13.48	0						rs3117340;rs3131088;rs7745220	1
1*	ENSG00000204703	OR2B3	6	29053985	29055090	-1	protein_coding	442184	OR2B3	0.00133693	0.45884	1	1.786	0						rs7754926;rs41316618	1
1*	ENSG00000204702	OR2J1	6	29068386	29069658	1	protein_coding		OR2J1	0.0174945		8	36	0					5.408e-97	rs7754926;rs41316618;rs9257745;rs3117340;rs3131088;rs151327481;rs190359016	1
1*	ENSG00000204701	OR2J3	6	29079668	29080603	1	protein_coding	442186	OR2J3	0.0281435	0.112859	4	14	0						rs7745220;rs9283885;rs3117340	1
1*	ENSG00000227206	XXbac-BCX196D17.5	6	29091987	29096685	1	lincRNA					16	10.11	0						rs7754926;rs41316618;rs3131088;rs151080251;rs7745220;rs60544848;rs58669168;rs112421807;rs3117340;rs9283885	1
1*	ENSG00000203492	OR2N1P	6	29105657	29106593	-1	pseudogene		OR2N1P			2	9.393	0						rs112421807;rs7754926;rs41316618	1
1*	ENSG00000204700	OR2J2	6	29141311	29142351	1	protein_coding	26707	OR2J2	0.0107267	0.271259	7	23.1	0					2.727e-36	rs3131088;rs115397636;rs3117340;rs4599679	1
1*	ENSG00000224233	OR2J4P	6	29149287	29150222	1	pseudogene		OR2J4P			6	9.398	0						rs3117340;rs3131088;rs151001546;rs139494877	1
1*	ENSG00000230598	OR2H4P	6	29183013	29183956	1	pseudogene		OR2H4P			1	12.94	0						rs3131088;rs3117340	1
1*	ENSG00000232505	XXbac-BPG308J9.3	6	29191750	29258217	1	lincRNA	101929006				176	13.1	0					2.194e-143	rs3131088;rs7754926;rs41316618;rs3117340;rs190359016;rs146185592;rs115397636;rs143256812;rs149704780;rs4599679;rs60544848;rs58669168;rs7745220;rs149597426;rs151080251;rs151001546;rs139494877;rs145263686;6:29229480;rs180803647;rs181752128;rs151327481	1
1*	ENSG00000204697	OR2U1P	6	29230480	29231856	-1	pseudogene		OR2U1P			4	11.02	0						rs7754926;rs41316618;rs3131088;rs3117340	1
1*	ENSG00000242524	OR2U2P	6	29236239	29237198	-1	pseudogene		OR2U2P			3	11.54	0						rs7754926;rs41316618;rs7745220;rs3131088	1
1*	ENSG00000197171	OR2B4P	6	29258488	29259430	1	pseudogene		OR2B4P			1	19.25	0						rs3131088	1
1*	ENSG00000204695	OR14J1	6	29274403	29275519	1	protein_coding	442191	OR14J1	8.02406e-08	1.33547	3	5.325	0					5.077e-267	rs3131088;rs115397636;rs9257745	1
1*	ENSG00000230056	DDX6P1	6	29297403	29298838	-1	pseudogene		DDX6P1			2	10.8	0						rs7745220	1
1*	ENSG00000243729	OR5V1	6	29323007	29399744	-1	protein_coding	81696	OR5V1	0.00344262	0.323635	111	23	0					3.651e-248	rs35095140;rs60544848;rs7745220;rs148472353;rs7349908;rs3930883;6:29602881;rs9257745;rs7754926;rs145263686;6:28713434;rs181751959;rs149704780;rs1419640;rs1419639;rs576366083;rs115397636;rs9468541;6:29359024;rs16894836;rs77454196;6:29370429;rs116973845;rs16894983;rs117680413;rs190359016;rs151001546;rs59818916;rs117137251;rs116963310	1
1*	ENSG00000112462	OR12D3	6	29341200	29343068	-1	protein_coding	81797	OR12D3	1.34136e-05	0.883549	5	12.7	0						rs7349908;rs145263686;rs7754926	1
1*	ENSG00000168787	OR12D2	6	29364416	29365448	1	protein_coding	26529	OR12D2	0.601033	0.457835	1	13.64	0						rs7349908	1
1*	ENSG00000204694	OR11A1	6	29393281	29424848	-1	protein_coding	26531	OR11A1	0.0434844	1.23026	23	21.9	0					1.744e-153	rs60544848;rs16894983;rs77454196;rs7349908;6:28713434;rs117137251;rs115397636;rs116963310;6:29504183;rs734962;rs2745401;rs16894836;rs181752128	1
1*	ENSG00000206474	OR10C1	6	29407083	29408731	1	protein_coding	442194	OR10C1	0.227592	0.363897	1	21.9	0					2.53e-91	rs734962;rs2745401	1
1*	ENSG00000204688	OR2H1	6	29424958	29432105	1	protein_coding	26716	OR2H1	0.0449041	-0.358288	6	11.34	0					6.297e-53	rs115397636;6:29504183;rs59818916;rs16894836	1
1*	ENSG00000225797	UBDP1	6	29432373	29437583	-1	pseudogene		UBDP1			3	11.35	0					2.266e-224	rs16894836;rs116973845	1
1*	ENSG00000230164	MAS1LP1	6	29442802	29443848	-1	pseudogene		MAS1LP1			1	2.55	0					9.56e-48	rs77454196	1
1*	ENSG00000213900	RPS17P1	6	29457048	29457453	-1	pseudogene		RPS17P1			1	4.983	0						rs115397636	1
1*	ENSG00000229274	XXbac-BPG13B8.10	6	29465286	29478333	1	lincRNA					21	7.947	0					1.603e-188	rs16894836;rs734962;rs9468541;rs59818916;rs16894983;rs150971595;rs181752128;rs115397636;rs118077891;rs2745401	1
1*	ENSG00000224582	LINC01015	6	29497197	29501345	1	antisense	100507362	LINC01015			2	1.524	0						rs190359016	1
1*	ENSG00000229281	GPR53P	6	29505481	29506564	-1	pseudogene		GPR53P			2	10.51	0					1.615e-32	rs60544848;6:28713434	1
1*	ENSG00000204681	GABBR1	6	29523406	29601753	-1	protein_coding	2550	GABBR1	0.99997	0.238892	163	20.1	2	2.46254e-06	1.26359e-08	GTEx/v8/Whole_Blood	+	6.349e-230	rs362529;rs1003582;rs29263;rs1233388;rs362525;rs17184367;rs115397636;rs138633183;rs143256812;rs117181567;rs146185592;rs138059097;rs41317798;rs9468561;6:29602881;rs60544848;rs150971595;rs9468541;rs3095268	1
1*	ENSG00000232173	OR2H5P	6	29541686	29542613	1	pseudogene		OR2H5P			3	13.95	0					5.548e-18	rs138633183;rs29263;rs143256812	1
1*	ENSG00000231301	RPL13AP	6	29550285	29550802	1	pseudogene		RPL13AP			1	10.66	0						rs1233388	1
1*	ENSG00000204657	OR2H2	6	29555683	29556745	1	protein_coding	7932	OR2H2	0.0899459	0.696836	4	17.83	6	0.000297525	0.019501	GTEx/v8/Whole_Blood			rs17184367;rs1003582;rs1233388;rs138059097;rs12206581	1
1*	ENSG00000112473	SLC39A7	6	33168222	33172216	1	protein_coding	7922	SLC39A7	0.0149908	-0.946036	1	10.82	0						rs110662	2
1*	ENSG00000204228	HSD17B8	6	33172419	33174608	1	protein_coding	7923	HSD17B8	0.744498	0.0599447	2	23.2	3	2.98275e-06	0.00224365	GTEx/v8/Whole_Blood	+	5.366e-16	rs110662	2
1*	ENSG00000204227	RING1	6	33176272	33180499	1	protein_coding	6015	RING1	0.915792		2	5.226	0						rs110662	2
1*	ENSG00000225463	ZNF70P1	6	33183482	33184105	1	pseudogene		ZNF70P1			2	8.494	0						rs110662	2
1*	ENSG00000232940	HCG25	6	33217311	33222766	1	antisense	414765	HCG25			6	14.77	0					3.155e-28	rs460568;rs15604;6:33222194	2
1*	ENSG00000223501	VPS52	6	33218049	33239824	-1	protein_coding	6293	VPS52	0.0159633	0.463747	12	14.77	0					2.912e-50	rs460568;rs15604;6:33222194;rs140678643;rs141400340	2
1*	ENSG00000231500	RPS18	6	33239787	33244287	1	protein_coding	6222	RPS18	0.962013	-0.158263	5	16.46	52	4.95945e-12	4.56281e-63	GTEx/v8/Whole_Blood	+	2.912e-50	rs460568;rs9461875;rs140007014;rs78531919	2
1*	ENSG00000235863	B3GALT4	6	33244917	33252609	1	protein_coding	8705	B3GALT4	0.236709		12	13.34	0						rs460568;rs15604;rs28795133;rs9277988	2
1*	ENSG00000227057	WDR46	6	33246885	33257304	-1	protein_coding	9277	WDR46	8.42035e-06	0.412534	12	20.6	0						rs15604;rs28795133;rs9277988;rs460568	2
1*	ENSG00000204220	PFDN6	6	33257079	33266178	1	protein_coding	102465501	PFDN6	0.859422	0.536101	5	16.58	0						rs460568;rs9277988;rs15604	2
1*	ENSG00000237441	RGL2	6	33259431	33267101	-1	protein_coding	5863	RGL2	0.0747683	-0.299562	5	16.58	0						rs460568;rs9277988;rs15604	2
1*	ENSG00000231925	TAPBP	6	33267471	33282164	-1	protein_coding	6892	TAPBP	0.000393582	0.574655	12	14.47	32	3.0262e-08	1.67585e-10	GTEx/v8/Whole_Blood	+	1.972e-79	rs15604;rs140814057;rs9277988;rs140678643;rs140293654;rs28795133;rs460568;rs210152;rs6457734;rs138965061;rs192895987	2
1*	ENSG00000236104	ZBTB22	6	33282183	33285719	-1	protein_coding	9278	ZBTB22	0.235099	0.0159136	2	7.016	0						rs9277988	2
1*	ENSG00000204209	DAXX	6	33286335	33297046	-1	protein_coding	1616	DAXX	0.842737	0.0174434	3	19.18	10	2.00042e-08	2.52762e-09	GTEx/v8/Whole_Blood	-	9.324e-41	rs140293654;rs9277988;rs460568	2
1*	ENSG00000237649	KIFC1	6	33359313	33377701	1	protein_coding	3833	KIFC1	0.015578	-0.29917	4	10.56	0					1.043e-35	rs140671946;rs151272307	2
1*	ENSG00000112511	PHF1	6	33378176	33384230	1	protein_coding	5252	PHF1	0.999559		2	14.02	0					3.734e-27	rs151272307;rs116199362	2
1*	ENSG00000112514	CUTA	6	33384219	33386094	-1	protein_coding	51596	CUTA	1.14218e-05	-0.619996	1	13.39	124	4.84349e-09	4.07883e-06	GTEx/v8/Whole_Blood	-	1.927e-75	rs1705003;rs9278004;rs15604;rs9461875;rs114770469	2
1*	ENSG00000197283	SYNGAP1	6	33387847	33421466	1	protein_coding	8831	SYNGAP1	0.999998	-1.10912	4	14.1	0						rs1705003;rs140671946;rs151272307	2
1*	ENSG00000242014	RN7SL26P	6	33508471	33508774	1	misc_RNA		RN7SL26P			1	2.956	0						rs9461875	2
1*	ENSG00000030110	BAK1	6	33540329	33548019	-1	protein_coding	578	BAK1	0.00348655	-0.655757	5	12.15	109	4.43749e-33	7.40449e-103	GTEx/v8/Cells_EBV-transformed_lymphocytes:GTEx/v8/Whole_Blood	-	6.073e-88	rs210164;rs5745588;rs140007014;rs210152;rs6457734;rs210216;rs1830873;rs34838160;rs12526020;rs9461875;rs386906;rs188340;rs138965061;rs6924010;rs13203795;rs9469532;rs2274198;rs942639;rs3823428	2
1*	ENSG00000204188	GGNBP1	6	33551515	33556803	1	protein_coding		GGNBP1			6	6.705	0						rs210164;rs386906	2
1*	ENSG00000197251	LINC00336	6	33553883	33561115	-1	antisense	401253	LINC00336			10	6.785	0					1.775e-24	rs210164;rs386906;rs138612476	2
1*	ENSG00000096433	ITPR3	6	33588142	33664351	1	protein_coding	3710	ITPR3	4.97537e-12		98	22.3	123	5.43008e-26	1.55593e-21	GTEx/v8/Whole_Blood	-	1.084e-233	rs6910386;rs149629897;rs13203795;rs188340;rs210216;rs9469532;rs114770469;rs139811108;rs75359196;rs942639;rs1830873;rs140678643;rs140007014;rs2274198;rs9469552;rs144156751;rs2296333;rs28795133;rs117296630;rs192895987;rs3763254;rs146888464;rs34838160;rs210164;rs386906;rs6924010	2
1*	ENSG00000137288	UQCC2	6	33662070	33679504	-1	protein_coding	100500873	UQCC2	0.0595477	0.254208	18	16.08	0					2.261e-08	rs192895987;rs145847433;rs3763254	2
1*	ENSG00000269490	SBP1	6	33663196	33663474	-1	protein_coding			0.00238547		1	6.143	0						rs192895987	2
1*	ENSG00000161896	IP6K3	6	33689444	33714762	-1	protein_coding	117283	IP6K3	0.0485339	1.72324	13	23.2	0					2.72e-27	rs192895987;rs145847433;rs117296630	2
1*	ENSG00000161904	LEMD2	6	33738979	33756913	-1	protein_coding	221496	LEMD2	0.302373	0.39292	12	22	0					3.943e-12	rs3763254;rs576489922;rs6941414;rs186920560;rs145847433	2
1*	ENSG00000096395	MLN	6	33762450	33771788	-1	protein_coding	4295	MLN	0.00165857	0.983258	11	11.7	0					5.804e-11	rs3763254;rs140678643;rs78531919;6:33767235;rs6941414;rs73747323	2
1*	ENSG00000249346	LINC01016	6	33835283	33864691	-1	lincRNA	100507584	LINC01016			17	9.786	0					4.742e-142	rs62397636;rs9366831;rs3823428	2
1*	ENSG00000233183	RP3-468B3.2	6	33861100	33895408	1	lincRNA	100653005				52	7.558	0					1.88e-231	rs3823428;rs3800341;rs28795133;rs9368784;rs9296102;rs6457748;rs9394179;rs4713719;rs1324578;rs4711366;rs79756150;rs144201162;rs2499761	2
1*	ENSG00000124493	GRM4	6	33989628	34123399	-1	protein_coding	2914	GRM4	0.97935	-0.635219	156	14.48	0					1.498e-234	rs2495999;rs3778041;rs2495996;rs2229900;rs2451361;rs140007014;rs9469702;rs568421342;rs200824858;rs34191868;rs9368792;rs77451337;rs11968206;rs7763695;rs6913755;rs146900754;rs28795133;rs3756925;rs75432840;rs117885712;rs182291280	2
1*	ENSG00000221779	AL590403.1	6	34036934	34036995	-1	miRNA					1	1.082	0					9.821e-57	rs9469702	2
1*	ENSG00000214810	CYCSP55	6	34187216	34187843	1	pseudogene		CYCSP55			1	0.534	0						rs1150781	2
1*	ENSG00000137309	HMGA1	6	34204650	34214008	1	protein_coding	3159	HMGA1	0.7243	-0.910116	9	15.93	0						rs1150781	2
1*	ENSG00000186577	C6orf1	6	34214157	34217247	-1	protein_coding	221491	C6orf1	0.298719	-0.834304	5	13.65	0					9.277e-120	rs1150781	2
1*	ENSG00000225339	RP11-513I15.6	6	34247456	34254545	1	lincRNA					3	11.85	0						rs3778077	2
1*	ENSG00000272325	NUDT3	6	34247456	34360451	-1	protein_coding	11165	NUDT3	0.876817	0.134938	79	16.02	0					1.187e-231	rs3778077;rs140007014;rs145223175;rs559658642;rs145371853	2
1*	ENSG00000270800	RPS10-NUDT3	6	34256547	34393825	-1	protein_coding	100529239	RPS10-NUDT3			112	16.02	0					1.187e-231	rs3778077;rs140007014;rs145223175;rs559658642;rs145371853;rs188106794;rs182291280	2
1*	ENSG00000124614	RPS10	6	34385231	34393902	-1	protein_coding	6204	RPS10	0.946463	0.204718	10	17.24	9	5.55404e-05	0.00168363	GTEx/v8/Whole_Blood			rs3778077;rs182291280;rs188106794	2
1*	ENSG00000124507	PACSIN1	6	34433916	34503006	1	protein_coding	29993	PACSIN1	0.991339	-1.5939	57	10.88	0					2.941e-218	rs9296115;rs182291280;rs188106794;rs145371853;rs62398681;rs140007014;rs3846867;rs7454888;rs9791348;rs71567453;rs73746675	2
1*	ENSG00000124664	SPDEF	6	34505579	34524110	-1	protein_coding	25803	SPDEF	0.711825	-0.40704	39	15.76	0					5.809e-43	rs9791348;rs73746675;rs3778070;rs3798543	2
1*	ENSG00000196821	C6orf106	6	34555065	34664636	-1	protein_coding	64771	C6orf106	0.45403	-1.13555	129	15.38	13	6.56291e-05	2.66904e-13	GTEx/v8/Whole_Blood		2.221e-198	rs6940215;rs201495468;rs820077;rs2814980;rs182291280;rs188106794;rs12208743;rs145371853;rs3800397;rs138807262;rs11758962;rs199931645;rs9791348	2
1*	ENSG00000265123	RN7SL200P	6	34653134	34653419	-1	misc_RNA		RN7SL200P			1	0.177	0						rs2814980	2
1*	ENSG00000220643	RP3-391O22.1	6	34654379	34654883	1	pseudogene					1	5.447	0						rs199931645	2
1*	ENSG00000217130	RP3-375P9.2	6	34711953	34712450	1	pseudogene					1	1.872	0						rs2814980	2
1*	ENSG00000124562	SNRPC	6	34725183	34741571	1	protein_coding	6631	SNRPC	0.727262	-0.35112	30	14.9	269	2.19941e-06	0.00346734	GTEx/v8/Whole_Blood	-	3.966e-165	rs6940215;rs201495468;rs820077;rs2814980;rs11758962	2
1*	ENSG00000065060	UHRF1BP1	6	34759857	34850915	1	protein_coding	54887	UHRF1BP1	2.46541e-07	-0.830354	171	23.8	621	5.23651e-90	6.00757e-78	GTEx/v8/Cells_EBV-transformed_lymphocytes:GTEx/v8/Whole_Blood	+	4.935e-166	rs2814980;rs201495468;rs6940215;rs820077;rs11758962;rs145371853;rs138807262;rs12208743;rs74469408;rs3800397;rs140007014;rs2092428;rs187472977;rs1150781;rs3778077;rs9296115;rs71567453;rs73746675;rs9791348;rs3798543;rs205270;rs6930756;rs2762346;rs112706550;rs732594;rs9470027;rs1051952;rs12181820;rs146032538	2
1*	ENSG00000064995	TAF11	6	34845555	34855866	-1	protein_coding	6882	TAF11	0.875432	-0.232569	15	10.53	57	1.60732e-05	0.0176312	GTEx/v8/Whole_Blood	+	4.192e-149	rs2092428;rs187472977;rs6940215;rs201495468;rs820077;rs149743744;rs11758962;rs148914899;rs2814980;rs3777744	2
1*	ENSG00000064999	ANKS1A	6	34857042	35059179	1	protein_coding	23294	ANKS1A	0.84686	0.260683	213	16.12	0					2.084e-156	rs2092428;rs6940215;rs201495468;rs820077;rs74469408;rs11758962;rs199931645;rs187472977;rs148914899;rs6930756;rs2762346;rs2091074;rs149743744;rs3777748	2
1*	ENSG00000124678	TCP11	6	35085848	35116387	-1	protein_coding	6954	TCP11	4.00945e-05	-0.413536	65	14.07	103	8.89288e-08	0.000817833	GTEx/v8/Cells_EBV-transformed_lymphocytes	+	2.726e-58	rs820077;rs3777748;rs2762346;rs10484578;rs117462486;rs201495468	2
1*	ENSG00000146197	SCUBE3	6	35182190	35220856	1	protein_coding	222663	SCUBE3	0.999984	-0.692415	36	22.8	1	0.000298388	0.00542146	GTEx/v8/Whole_Blood	+	3.528e-189	rs3777744;rs148914899;rs3800381;rs117462486;rs732594;rs3734252;rs145371853;rs138807262;rs112706550;rs10484578	2
1*	ENSG00000272374	RP3-329A5.8	6	35188147	35192407	-1	lincRNA					6	9.427	0						rs3777744	2
1*	ENSG00000065029	ZNF76	6	35226686	35263762	1	protein_coding	7629	ZNF76	5.07289e-16	0.397539	56	21.3	300	1.34106e-22	1.99809e-17	GTEx/v8/Whole_Blood	-	1.473e-123	rs3777744;rs117462486;rs3734252;rs80201972;rs188106794;rs10484578;rs112706550;rs138807262;rs201495468;rs6940215;rs820077;rs2762346;rs732594;rs2206030;rs11755391	2
1*	ENSG00000217004	RP3-329A5.1	6	35246954	35247596	-1	pseudogene					1	0.125	0						rs3777744	2
1*	ENSG00000023892	DEF6	6	35265595	35289548	1	protein_coding	50619	DEF6	0.976824	0.153811	30	15.11	360	1.23728e-50	4.9437e-42	GTEx/v8/Cells_EBV-transformed_lymphocytes:GTEx/v8/Whole_Blood	-	4.935e-166	rs3777744;rs80201972;rs188106794;rs2814980;rs11758962;rs12208743;rs201495468;rs6940215;rs820077;rs2762346;rs3777748;rs10484578;rs732594;rs112706550;rs2206030;rs11755391;rs9394299;rs9470027;rs74292915;rs2817038	2
1*	ENSG00000112033	PPARD	6	35310335	35395968	1	protein_coding	5467	PPARD	0.966868	0.253949	56	12.71	4	3.33992e-05	0.0248158	GTEx/v8/Whole_Blood		3.725e-186	rs149743744;rs3777744;rs10484578;rs112706550;rs188106794;rs187472977;rs7763692;rs117462486;rs80201972;rs145371853;rs3800397;rs138807262	2
1*	ENSG00000227154	MKRNP2	6	35410821	35417643	1	pseudogene					8	8.809	0					2.844e-50	rs74292915;rs11755391;rs2206030;rs9470027	2
1*	ENSG00000112039	FANCE	6	35420138	35434880	1	protein_coding	2178	FANCE	0.0031389		40	21.8	0					1.443e-41	rs74292915;rs11755391;rs9470027;rs3734252;rs9394299	2
1*	ENSG00000198755	RPL10A	6	35436185	35438562	1	protein_coding	4736	RPL10A	0.302379	-0.217537	5	10.9	206	1.90744e-25	5.99472e-20	GTEx/v8/Whole_Blood	+	3.725e-186	rs74292915;rs149743744;rs9470027;rs6940215;rs201495468;rs820077;rs2762346;rs10484578;rs3777744;rs112706550;rs145371853;rs3800397;rs138807262;rs2206030;rs11755391	2
1*	ENSG00000007866	TEAD3	6	35441374	35464853	-1	protein_coding	7005	TEAD3		0.0454437	24	16.26	4	0.000175995	0.00370662	GTEx/v8/Whole_Blood	-	3.24e-52	rs74292915;rs9394299;rs9470027;rs57488933;rs3734252;rs7738710;rs4713902;rs12181820;rs1051952;rs3798346	2
1*	ENSG00000112041	TULP1	6	35465651	35480715	-1	protein_coding	7287	TULP1	0.807904	-0.139077	16	19.09	0					8.186e-92	rs1051952;rs146032538;rs7738710;rs12181820	2
1*	ENSG00000228559	RP3-340B19.3	6	35512409	35513446	1	lincRNA					1	3.655	0						rs146032538	2
1*	ENSG00000096060	FKBP5	6	35541362	35696360	-1	protein_coding	2289	FKBP5	0.498849	-0.767039	71	16.57	11	5.35993e-06	0.0223564	GTEx/v8/Cells_EBV-transformed_lymphocytes	-	9.698e-157	rs4713902;rs11751447;rs146032538;rs3798346;rs143990994;rs138807262;rs558815327;rs144791221;rs4713912;rs7751693;rs3777744	2
1*	ENSG00000218749	RP3-340B19.5	6	35575405	35575711	1	pseudogene					1	6.88	0						rs4713902	2
1*	ENSG00000232909	RP3-510O8.4	6	35701644	35704724	-1	antisense	285847				3	4.513	0					1.878e-92	rs2817038;rs143990994;rs149712527	2
1*	ENSG00000157343	ARMC12	6	35704809	35716856	1	protein_coding	221481	ARMC12	0.000270202	0.274184	41	17.07	0					2.419e-42	rs2817038;rs6936778;rs2766542;rs11968757;rs144791221	2
1*	ENSG00000220734	RP3-510O8.3	6	35733685	35734704	1	pseudogene					4	7.846	0						rs115651488;rs1343796	2
1*	ENSG00000196748	CLPSL2	6	35744371	35747329	1	protein_coding	389383	CLPSL2	0.146625	0.0550255	2	6.682	0					9.343e-11	rs115651488	2
1*	ENSG00000204140	CLPSL1	6	35748794	35761452	1	protein_coding	340204	CLPSL1	0.00164847	-0.303706	15	13.93	0					1.289e-12	rs115651488;rs9462110;rs150508695	2
1*	ENSG00000137392	CLPS	6	35762759	35765088	-1	protein_coding	1208	CLPS	0.0562748	0.768245	3	2.803	0						rs115651488	2
1*	ENSG00000197753	LHFPL5	6	35773070	35801651	1	protein_coding	222662	LHFPL5	0.494778	2.59192	42	8.836	0					2.537e-16	rs12153849;rs2766527;rs150508695	2
1*	ENSG00000096063	SRPK1	6	35800743	35889119	-1	protein_coding	6732	SRPK1	0.000394807	-0.861232	150	19.13	144	3.36944e-06	0.000523587	GTEx/v8/Whole_Blood	+	2.57e-21	rs2766527;rs12153849;rs144372631;rs58632953;rs10755688;rs16884857;rs7757672	2
1*	ENSG00000112053	SLC26A8	6	35911291	35992645	-1	protein_coding	116369	SLC26A8	7.64803e-08	-0.443472	84	9.59	113	2.73671e-28	9.75302e-23	GTEx/v8/Whole_Blood	-	5.937e-73	rs12153849;rs150508695;rs143990994;rs12527957;rs10755688;rs138807262;rs144372631;rs16884857;rs1100864;rs58632953;rs2071863	2
1*	ENSG00000271304	DPRXP2	6	35957292	35958213	-1	pseudogene		DPRXP2			2	3.357	0						rs10755688	2
1*	ENSG00000112062	MAPK14	6	35995488	36079013	1	protein_coding	1432	MAPK14	0.997467	-0.995766	121	15.79	2	9.22424e-05	0.0234787	GTEx/v8/Whole_Blood		7.183e-32	rs58632953;rs16884857;rs1100864;rs10755688;rs143990994;rs138807262	2
1*	ENSG00000237719	RP1-179N16.3	6	36059768	36060423	-1	pseudogene					2	7.351	0						rs58632953;rs16884857;rs1100864	2
1*	ENSG00000156711	MAPK13	6	36095586	36107842	1	protein_coding	5603	MAPK13	5.4835e-07		7	8.348	15	4.74204e-07	0.000765592	GTEx/v8/Cells_EBV-transformed_lymphocytes:GTEx/v8/Whole_Blood	+	2.632e-35	rs2071863;rs12201042;rs10755688;rs16884857	2
1*	ENSG00000221743	Z95152.1	6	36108275	36108365	-1	miRNA					1	10.28	0						rs12201042	2
1*	ENSG00000246982	RP1-179N16.6	6	36114475	36164982	-1	antisense					23	14.95	24	6.5722e-30	3.74177e-24	GTEx/v8/Cells_EBV-transformed_lymphocytes:GTEx/v8/Whole_Blood	-	4.237e-200	rs12201042;rs2071863;rs138807262;rs9394333;rs72657688;rs9470228;rs1343796;rs1100864	2
1*	ENSG00000096070	BRPF3	6	36164521	36200567	1	protein_coding	27154	BRPF3	0.993941	-0.654098	1	10.77	4	5.58108e-06	0.0281962	GTEx/v8/Cells_EBV-transformed_lymphocytes			rs143990994;rs12201042	2
1*	ENSG00000180316	PNPLA1	6	36210980	36276372	1	protein_coding	285848	PNPLA1	0.0004652	0.071643	19	7.921	1	0.000133607	0.0173724	GTEx/v8/Whole_Blood		6.94e-43	rs72657688;rs143990994;rs6457895;rs11754972;rs34927038;rs763018	2
1*	ENSG00000189325	C6orf222	6	36283534	36304662	-1	protein_coding	389384	C6orf222	1.39401e-13	-0.834863	9	7.891	0					9.046e-33	rs763018;rs11965340;rs4713959	2
1*	ENSG00000010030	ETV7	6	36322419	36356164	-1	protein_coding	51513	ETV7	2.00673e-08	0.118035	67	11.63	409	7.35549e-83	3.89311e-86	GTEx/v8/Whole_Blood	-	1.006e-101	rs73406999;rs6457907;rs3213529;rs4713959;rs143990994;rs744848;rs6923337;rs200827677;rs541787992;rs9380582;rs12215712;rs10947616;rs1059234;rs236486	2
1*	ENSG00000224666	RP1-50J22.4	6	36354608	36359771	1	antisense					5	10.89	0						rs6923337	2
1*	ENSG00000179165	PXT1	6	36358328	36410666	-1	protein_coding	222659	PXT1	1.31676e-05	-1.02899	128	14.15	263	2.07936e-07	0.000497786	GTEx/v8/Whole_Blood	+	2.079e-90	rs6923337;rs200827677;rs541787992;rs9349011	2
1*	ENSG00000112078	KCTD20	6	36410544	36458920	1	protein_coding	222658	KCTD20	0.399322	-0.309498	82	26.7	0					8.98e-195	rs541787992;rs6923337;rs200827677;rs143990994	2
1*	ENSG00000240733	RN7SL502P	6	36418692	36418978	-1	misc_RNA		RN7SL502P			1	2.246	0						rs6923337	2
1*	ENSG00000112079	STK38	6	36461669	36515247	-1	protein_coding	11329	STK38	0.853295	-0.412586	115	17.3	0					3.697e-204	rs6923337;rs143990994;rs200827677;rs9349011;rs541787992	2
1*	ENSG00000239964	RN7SL748P	6	36489968	36490275	1	misc_RNA		RN7SL748P			1	2.293	0						rs6923337	2
1*	ENSG00000112081	SRSF3	6	36562145	36573377	1	protein_coding	6428	SRSF3	0.976175	0.461923	7	5.616	0					1.658e-266	rs9380582;rs143990994	2
1*	ENSG00000251864	Y_RNA	6	36640615	36640721	1	misc_RNA					1	1.439	0						rs10947616	2
1*	ENSG00000213500	LAP3P2	6	36641594	36643047	1	pseudogene	101154753	LAP3P2			15	12.24	0						rs10947616;rs143990994	2
1*	ENSG00000124762	CDKN1A	6	36644305	36655116	1	protein_coding	1026	CDKN1A	0.0272026	-0.171688	10	15.09	1	3.50707e-05	0.0404786	GTEx/v8/Whole_Blood		1.348e-254	rs1059234;rs10947616;rs2395655;rs143990994;rs9349011;rs541787992;rs10947652	2
1*	ENSG00000255587	RAB44	6	36683256	36699870	1	protein_coding	401258	RAB44			16	20.3	33	1.26384e-11	4.56334e-16	GTEx/v8/Cells_EBV-transformed_lymphocytes:GTEx/v8/Whole_Blood	+	1.024e-182	rs236492;rs236486;rs541787992;rs143990994;rs4236052;rs1059234;rs10947616;rs929051;rs236416;rs236414	2
1*	ENSG00000220349	RP3-431A14.4	6	36704827	36705763	1	pseudogene					1	7.708	0						rs6904294	2
1*	ENSG00000124772	CPNE5	6	36708552	36807778	-1	protein_coding	57699	CPNE5	0.0778898		86	17.66	0					1.079e-111	rs6904294;rs58471412;rs143990994;rs929051;rs541787992;rs236426;rs236486;rs4236052;rs144332307;rs236416;rs236414;rs9380602;rs16889143;rs9349011;rs3213538;rs6940728;rs139822447;rs236377;rs183702303	2
1*	ENSG00000137168	PPIL1	6	36822603	36842800	-1	protein_coding	51645	PPIL1	0.013004	-1.13017	8	7.221	30	8.02843e-08	3.95114e-05	GTEx/v8/Cells_EBV-transformed_lymphocytes:GTEx/v8/Whole_Blood	-	2.171e-20	rs517878	2
1*	ENSG00000198663	C6orf89	6	36839646	36896740	1	protein_coding	221477	C6orf89	8.22352e-05	-0.0645907	33	13.84	0					1.09e-189	rs517878;rs143990994;rs139822447;rs541787992;rs374360645	2
1*	ENSG00000232598	RP1-90K10.4	6	36907847	36912451	-1	lincRNA					1	0.975	0					3.354e-17	rs697749	2
1*	ENSG00000164530	PI16	6	36922209	36932613	1	protein_coding	221476	PI16	4.4013e-07	0.152224	29	16.35	12	8.63651e-18	4.48105e-16	GTEx/v8/Whole_Blood	+	8.37e-139	rs1063021;rs10947652;rs111469215;rs143990994;rs139822447	2
1*	ENSG00000137409	MTCH1	6	36935917	36954074	-1	protein_coding	23787	MTCH1	0.964879	0.26492	3	6.596	0					6.223e-229	rs3778027;rs111469215;rs4714030	2
1*	ENSG00000146192	FGD2	6	36973422	36996846	1	protein_coding	221472	FGD2	4.70751e-05	-0.0659922	20	10.21	1	0.000106674	5.35677e-13	GTEx/v8/Whole_Blood		5.331e-75	rs139822447;rs541787992;rs708017;rs831504;rs111469215	2
1*	ENSG00000226976	COX6A1P2	6	37012607	37013177	1	protein_coding		COX6A1P2	0.1396		1	12.09	0						rs9470463	2
1*	ENSG00000137193	PIM1	6	37137979	37143202	1	protein_coding	5292	PIM1	0.886576	-0.322027	3	15.83	0						rs262909;rs541787992;rs9349011	2
1*	ENSG00000172738	TMEM217	6	37179956	37225931	-1	protein_coding	221468	TMEM217	0.00500603	0.535714	5	7.517	0					7.918e-17	rs541787992;rs139822447	2
1*	ENSG00000065491	TBC1D22B	6	37225548	37300746	1	protein_coding	55633	TBC1D22B	0.00637063	0.175249	1	1.649	0						rs541787992	2
1*	ENSG00000137200	CMTR1	6	37400995	37450603	1	protein_coding	23070	CMTR1	0.999295	-0.452716	24	11.51	0					2.083e-08	rs2254710	2
1*	ENSG00000198937	CCDC167	6	37450696	37467698	-1	protein_coding	154467	CCDC167	0.00208988	0.155729	15	20.2	57	2.54482e-11	7.22571e-13	GTEx/v8/Whole_Blood	-	9.262e-10	rs2254710;rs143990994;rs262909	2
1*	ENSG00000204110	RP1-153P14.8	6	37475124	37503392	1	lincRNA	100505530				22	13.94	52	3.19082e-11	1.42877e-07	GTEx/v8/Cells_EBV-transformed_lymphocytes	+	5.88e-10	rs2254710;rs2246439;rs111469215;rs2797777;rs2797779	2
1*	ENSG00000229559	RP1-153P14.3	6	37511329	37515056	-1	pseudogene	100505550				8	7.171	0						rs2797779;rs2797777	2
1*	ENSG00000227920	RP1-153P14.5	6	37512921	37518636	1	lincRNA					8	12.55	77	3.76202e-54	1.65061e-62	GTEx/v8/Whole_Blood	+	5.88e-10	rs2797779;rs2797777;rs2254710;rs2246439	2
1*	ENSG00000112139	MDGA1	6	37600284	37667082	-1	protein_coding	266727	MDGA1	0.995237	2.07709	12	12.75	5	7.5681e-05	2.75742e-142	GTEx/v8/Whole_Blood		2.434e-77	rs139822447;rs79699826;rs73734242;rs9369009;rs1776441	2
1*	ENSG00000225945	RP3-441A12.1	6	37783553	37786994	-1	antisense					1	1.122	0						rs72850893;rs11757371	2
1*	ENSG00000156639	ZFAND3	6	37787275	38122400	1	protein_coding	60685	ZFAND3	0.961978	-0.0185809	66	17.01	61	2.96009e-06	0.000532338	GTEx/v8/Whole_Blood	-	2.195e-60	rs72850893;rs11757371;rs79699826	2
1*	ENSG00000183826	BTBD9	6	38136227	38607924	-1	protein_coding	114781	BTBD9	0.00573299	4.50562	150	18.39	0					1.275e-64	rs79699826;rs9369042;rs4626419;rs4714164;rs228183;rs9366958	2
1*	ENSG00000124721	DNAH8	6	38683117	38998301	1	protein_coding	1769	DNAH8	2.09466e-37		45	19.61	0					5.603e-49	rs79699826;rs761385	2
1*	ENSG00000231150	RP1-207H1.3	6	38890805	38920875	-1	antisense	100131047				5	19.61	0						rs79699826;rs761385	2
1*	ENSG00000112164	GLP1R	6	39016574	39055519	1	protein_coding	2740	GLP1R	0.064078	0.773211	2	6.109	0					1.259e-39	rs79699826	2
1*	ENSG00000164626	KCNK5	6	39156749	39197226	-1	protein_coding	8645	KCNK5	0.884298	-0.520607	6	4.638	0					7.211e-09	rs10456100	2
1*	ENSG00000124780	KCNK17	6	39266777	39282329	-1	protein_coding	89822	KCNK17	3.39348e-06	-0.153162	1	0.361	0						rs2758901	2
1*	ENSG00000164627	KIF6	6	39297766	39693181	-1	protein_coding	221458	KIF6	1.03952e-16	5.66875	13	19.82	0					2.897e-31	rs4714239;rs72860035	2
1*	ENSG00000146122	DAAM2	6	39760142	39872648	1	protein_coding	23500	DAAM2	0.998286	0.571965	3	2.944	0						rs72860035	2
1*	ENSG00000124615	MOCS1	6	39867354	39902290	-1	protein_coding	4337	MOCS1	0.000969834	1.77835	4	6.129	0						rs72860035	2
1*	ENSG00000220586	TUBBP9	6	39960554	39967972	1	pseudogene		TUBBP9			3	1.287	0						rs72860035	2
1*	ENSG00000124749	COL21A1	6	55921388	56258892	-1	protein_coding	81578	COL21A1	1.15404e-20	0.264548	1	2.146	0					1.033e-10	rs117602279	3
1*	ENSG00000151914	DST	6	56322785	56819426	-1	protein_coding	667	DST	1	-0.505332	50	12.36	0					4.092e-15	rs146941321;rs141007158;rs144804328;rs1562908	3
1*	ENSG00000231441	RP11-472M19.2	6	56708800	56728876	1	antisense					1	9.71	0						rs141007158;rs146941321	3
1*	ENSG00000151917	BEND6	6	56819773	56892140	1	protein_coding	221336	BEND6	0.135146	-0.28861	86	17.07	58	1.09309e-06	0.00499914	GTEx/v8/Cells_EBV-transformed_lymphocytes	-	1.835e-08	rs1562908;rs141007158	3
1*	ENSG00000219790	OSTCP6	6	56840404	56840860	-1	pseudogene		OSTCP6			1	8.772	0						rs1562908	3
1*	ENSG00000168116	KIAA1586	6	56911347	56920023	1	protein_coding	57691	KIAA1586	1.77777e-06	-0.629459	2	10.86	57	8.04578e-13	2.64782e-08	GTEx/v8/Cells_EBV-transformed_lymphocytes:GTEx/v8/Whole_Blood	-	6.06e-09	rs9367715;rs1562908	3
1*	ENSG00000112200	ZNF451	6	56951642	57035105	1	protein_coding	26036	ZNF451	1.98298e-06	-0.882458	17	14.83	0						rs9367715;rs141007158	3
1*	ENSG00000226803	RP11-203B9.4	6	56979692	57039034	-1	antisense	101927211				11	14.83	0						rs9367715;rs141007158	3
1*	ENSG00000112208	BAG2	6	57037124	57054631	1	protein_coding	9532	BAG2	0.0883361	-1.86606	5	7.138	0						rs9367715	3
1*	ENSG00000112210	RAB23	6	57053607	57087078	-1	protein_coding	51715	RAB23	0.0385174	-1.27776	7	7.417	89	1.63745e-09	1.32551e-07	GTEx/v8/Cells_EBV-transformed_lymphocytes:GTEx/v8/Whole_Blood	+	2.921e-09	rs12195875;rs9367715;rs1562908	3
1*	ENSG00000146143	PRIM2	6	57179603	57513375	1	protein_coding	100996481	PRIM2	5.14708e-08		29	12.16	0					2.046e-12	rs7738699	3
1*	ENSG00000215190	LINC00680	6	58272352	58287779	-1	processed_transcript	100996497	LINC00680			0	0	56	2.22596e-08	1.79797e-64	GTEx/v8/Whole_Blood	-	2.44e-12	rs1562908;rs9367715;rs7738699	3
1*	ENSG00000112232	KHDRBS2	6	62389865	62996132	-1	protein_coding	202559	KHDRBS2	0.142878	-0.854757	105	14.01	0					6.692e-46	rs139753688;rs75465119;rs6453681;rs176614	4
1*	ENSG00000216859	RP11-448N11.1	6	63170845	63171408	-1	pseudogene					2	5.198	0						rs6453681	4
1*	ENSG00000217067	RP11-448N11.2	6	63257332	63258177	1	pseudogene					2	7.619	0						rs6453681	4
1*	ENSG00000146166	LGSN	6	63985856	64029882	-1	protein_coding	51557	LGSN	2.58999e-07	-0.165289	1	8.126	0					1.604e-38	rs151291837	4
1*	ENSG00000112245	PTP4A1	6	64231666	64293492	1	protein_coding	7803	PTP4A1	0.889901	-2.05835	2	2.471	0						rs151291837	4
1*	ENSG00000188107	EYS	6	64429876	66417118	-1	protein_coding	346007	EYS	8.21411e-09	-0.394014	45	14.03	0					4.178e-25	rs151291837;rs118070556;rs79415685;rs77102820;rs144867071;rs12215142;rs145239116	4
1*	ENSG00000232120	RP11-349P19.1	6	65087688	65122672	1	antisense					4	1.209	0					5.139e-19	rs79415685;rs118070556	4
1*	ENSG00000255447	CTD-2210P24.6	11	45834770	45846809	1	lincRNA					1	2.743	0					8.64e-14	rs77817195	5
1*	ENSG00000121653	MAPK8IP1	11	45907202	45928016	1	protein_coding	9479	MAPK8IP1	0.999001	-0.226009	1	4.752	0						rs77817195	5
1*	ENSG00000157613	CREB3L1	11	46299212	46342972	1	protein_coding	90993	CREB3L1	0.399379		2	12.23	0					1.454e-08	rs147894496	6
1*	ENSG00000149091	DGKZ	11	46354455	46402104	1	protein_coding	8525	DGKZ	0.998143	-0.438701	1	1.895	0					1.411e-22	rs146364498	6
1*	ENSG00000110497	AMBRA1	11	46417964	46615675	-1	protein_coding	55626	AMBRA1	0.999972	-0.701715	1	2.294	0						rs146364498	6
1*	ENSG00000175224	ATG13	11	46638826	46696368	1	protein_coding	9776	ATG13	0.984297	-0.658639	1	3.675	0					4.559e-19	rs146364498	6
1*	ENSG00000149179	C11orf49	11	46958240	47185936	1	protein_coding	79096	C11orf49	5.45468e-07	0.564558	1	2.089	0					1.025e-16	rs74333972	6
1*	ENSG00000270060	RP11-390K5.6	11	47189832	47191114	-1	sense_intronic					0	0	4	0.000113894	0.0411629	GTEx/v8/Whole_Blood			rs7945911	6
1*	ENSG00000165912	PACSIN3	11	47199076	47207994	-1	protein_coding	29763	PACSIN3	0.016793	-0.514939	1	5.44	0						rs74333972	6
1*	ENSG00000134574	DDB2	11	47236493	47260767	1	protein_coding	1643	DDB2	0.00511791	0.677015	0	0	2	0.000410694	0.019693	GTEx/v8/Whole_Blood			rs7945911	6
1*	ENSG00000134575	ACP2	11	47260853	47270457	-1	protein_coding	53	ACP2	0.000525977	-0.370782	0	0	153	8.98566e-16	1.70401e-25	GTEx/v8/Cells_EBV-transformed_lymphocytes:GTEx/v8/Whole_Blood	+	3.374e-15	rs7945911;rs7927965;rs4103567	6
1*	ENSG00000025434	NR1H3	11	47269851	47290396	1	protein_coding	10062	NR1H3	0.856186	0.657584	0	0	41	1.55887e-06	0.000342143	GTEx/v8/Whole_Blood			rs118011483;rs7945911;rs1228008	6
1*	ENSG00000110514	MADD	11	47290712	47351582	1	protein_coding	8567	MADD	0.000901823	-0.37505	0	0	127	3.61734e-09	2.47653e-07	GTEx/v8/Whole_Blood	+	5.239e-35	rs118011483;rs1228008;rs7945911	6
1*	ENSG00000134571	MYBPC3	11	47352957	47374253	-1	protein_coding	4607	MYBPC3	1.35054e-06	-0.432352	2	9.442	73	9.18137e-08	4.02707e-22	GTEx/v8/Whole_Blood	+	1.154e-19	rs7945911;rs7927965;rs4103567;rs11604358	6
1*	ENSG00000066336	SPI1	11	47376411	47400127	-1	protein_coding	6688	SPI1	0.897231		11	6.801	0						rs7945911;rs118011483	6
1*	ENSG00000255197	RP11-750H9.5	11	47404699	47430741	-1	antisense					17	11.49	88	1.38635e-06	0.00106114	GTEx/v8/Whole_Blood	-	2.804e-49	rs118011483;rs7945911;rs78559029;rs375314312;rs1228008;rs7130402	6
1*	ENSG00000265910	AC090559.2	11	47407633	47407733	-1	miRNA					1	5.697	0						rs118011483	6
1*	ENSG00000165915	SLC39A13	11	47428683	47438047	1	protein_coding	91252	SLC39A13	0.011852	-0.332419	5	12.66	37	2.94118e-06	0.00197941	GTEx/v8/Whole_Blood			rs7945911;rs118011483;rs1228008	6
1*	ENSG00000165916	PSMC3	11	47440320	47447993	-1	protein_coding	5702	PSMC3	0.9792	-0.404697	4	10.19	89	1.53872e-05	0.00732415	GTEx/v8/Whole_Blood	-	5.239e-35	rs7945911;rs118011483;rs1228008	6
1*	ENSG00000165917	RAPSN	11	47459308	47470730	-1	protein_coding	5913	RAPSN	0.0326445	0.0487816	21	22	0					2.846e-70	rs118011483;rs1228008;rs7945911;rs78559029	6
1*	ENSG00000149187	CELF1	11	47487496	47587121	-1	protein_coding	10658	CELF1	0.998617	-0.376216	41	17.35	24	3.39589e-05	0.0143502	GTEx/v8/Whole_Blood	+	9.225e-24	rs7945911;rs118011483;rs1228008	6
1*	ENSG00000213619	NDUFS3	11	47586888	47606114	1	protein_coding	4722	NDUFS3	0.047137	-0.0123446	5	8.867	0					5.205e-35	rs7945911;rs118011483;rs1228008	6
1*	ENSG00000110536	PTPMT1	11	47586982	47595013	1	protein_coding	114971	PTPMT1	0.459152		2	8.867	0					5.205e-35	rs7945911;rs118011483	6
1*	ENSG00000123444	KBTBD4	11	47593749	47600567	-1	protein_coding	55709	KBTBD4	0.0180744	-0.492621	1	7.299	0						rs7945911	6
1*	ENSG00000172247	C1QTNF4	11	47611216	47616211	-1	protein_coding	114900	C1QTNF4	0.679081		0	0	159	1.09152e-12	1.89264e-25	GTEx/v8/Whole_Blood	+	3.181e-21	rs7945911;rs7927965;rs4103567	6
1*	ENSG00000109919	MTCH2	11	47638867	47664175	-1	protein_coding	23788	MTCH2	0.166788	0.0369336	3	2.508	0						rs7945911;rs118011483;rs1228008	6
1*	ENSG00000165923	AGBL2	11	47681143	47736941	-1	protein_coding	79841	AGBL2	6.81051e-12	-0.765874	23	13.56	26	2.19104e-05	0.0359629	GTEx/v8/Cells_EBV-transformed_lymphocytes	-	4.943e-15	rs7945911;rs118011483;rs1228008	6
1*	ENSG00000109920	FNBP4	11	47738072	47788995	-1	protein_coding	23360	FNBP4	0.999993	-0.713792	21	7.441	0					4.874e-34	rs118011483;rs1228008;rs7945911;rs78559029	6
1*	ENSG00000030066	NUP160	11	47799639	47870107	-1	protein_coding	23279	NUP160	0.0239792	-0.345694	31	10.69	137	1.47621e-08	2.19571e-05	GTEx/v8/Whole_Blood	+	3.374e-15	rs118011483;rs1228008;rs7945911;rs7927965;rs4103567	6
1*	ENSG00000149177	PTPRJ	11	48002113	48189670	1	protein_coding	5795	PTPRJ	2.38654e-05		57	20.8	145	1.43112e-10	3.12652e-09	GTEx/v8/Whole_Blood	-	1.02e-275	rs1228008;rs75874665;rs7130402;rs7927965;rs11604358;rs7945911;rs4103567	6
1*	ENSG00000175619	OR4B1	11	48238344	48239314	1	protein_coding	119765	OR4B1	0.010938	0.304381	1	26	0						rs11604358	6
1*	ENSG00000176567	OR4X1	11	48285413	48286330	1	protein_coding	390113	OR4X1	0.000157675	0.54039	1	23.5	0						rs4103567;rs7927965	6
1*	ENSG00000176547	OR4C3	11	48346472	48347507	1	protein_coding	256144	OR4C3	0.00874513	0.0970577	1	15.34	0					4.233e-300	rs12794960	6
1*	ENSG00000197161	OR4C4P	11	48366900	48373999	-1	pseudogene		OR4C4P			4	8.54	0						rs7927965;rs4103567;rs11604358	6
1*	ENSG00000176540	OR4C5	11	48387037	48388017	-1	protein_coding		OR4C5	0.0165677		1	16.87	0						rs4103567;rs7927965	6
1*	ENSG00000182565	OR4C2P	11	48441762	48442825	1	pseudogene		OR4C2P			1	1.787	0						rs4103567;rs7927965	6
1*	ENSG00000184789	OR4C10P	11	48453769	48454699	-1	pseudogene		OR4C10P			1	2.292	0						rs7927965	6
1*	ENSG00000237388	OR4A47	11	48510269	48511332	1	protein_coding	403253	OR4A47	1.43391e-05	0.482909	3	13.83	0						rs7927965;rs11604358	6
1*	ENSG00000255113	OR4A48P	11	48513578	48513968	1	pseudogene		OR4A48P			3	6.022	0						rs7927965	6
1*	ENSG00000255304	OR4A46P	11	48517900	48518832	1	pseudogene		OR4A46P			1	2.039	0						rs7927965	6
1*	ENSG00000254832	OR4A40P	11	48533825	48534772	1	pseudogene		OR4A40P			3	3.689	0						rs11604358;rs7927965	6
1*	ENSG00000255534	OR4A43P	11	48547616	48548523	1	pseudogene		OR4A43P			1	0.034	0						rs7927965	6
1*	ENSG00000255297	OR4A41P	11	48611312	48612239	1	pseudogene		OR4A41P			3	8.226	0						rs4103567;rs7927965	6
1*	ENSG00000254674	OR4A42P	11	48631615	48632552	1	pseudogene		OR4A42P			1	12.18	0						rs11604358	6
1*	ENSG00000255053	OR4A44P	11	48649098	48650045	1	pseudogene		OR4A44P			2	8.428	0						rs7927965	6
1*	ENSG00000255551	RP11-56P9.5	11	48901663	48906789	1	pseudogene					3	2.273	0						rs11604358;rs7927965	6
1*	ENSG00000254728	RP11-56P9.10	11	48903275	48923733	-1	pseudogene					9	11.35	0						rs11604358;rs4103567;rs7927965	6
1*	ENSG00000255527	RP11-56P9.4	11	48928655	48930498	1	pseudogene					2	3.423	0						rs4103567;rs7927965	6
1*	ENSG00000249910	TRIM51CP	11	48967246	48973447	1	pseudogene		TRIM51CP			7	11.38	0						rs4103567;rs7927965	6
1*	ENSG00000220948	TRIM51GP	11	48997053	49003247	-1	pseudogene		TRIM51GP			4	3.591	0					9.807e-21	rs4103567;rs7927965	6
1*	ENSG00000254764	TRIM53CP	11	49007423	49013433	-1	pseudogene		TRIM53CP			4	5.237	0						rs4103567;rs7927965;rs11604358	6
1*	ENSG00000205044	RP11-56P9.11	11	49035495	49037446	-1	pseudogene					1	4.34	0						rs4103567;rs7927965	6
1*	ENSG00000182053	TRIM49B	11	49050504	49059579	1	protein_coding	283116	TRIM49B	7.55661e-05	0.0453407	4	10.93	0						rs4103567	6
1*	ENSG00000214891	TRIM64C	11	49075266	49080664	-1	protein_coding	646754	TRIM64C	0.0121166		3	1.682	0						rs4103567;rs7927965	6
1*	ENSG00000229361	UBTFL7	11	49103459	49104649	1	pseudogene		UBTFL7			1	7.56	0						rs4103567	6
1*	ENSG00000254412	RP11-107P7.6	11	49119715	49122720	-1	pseudogene					1	4.69	0						rs4103567	6
1*	ENSG00000254993	RP11-107P7.5	11	49138571	49146122	-1	pseudogene					6	7.255	0						rs4103567;rs7927965;rs12797853;rs11604358	6
1*	ENSG00000086205	FOLH1	11	49168187	49230222	-1	protein_coding	219595	FOLH1	0.253397	-0.0941583	27	10.1	0					6.861e-267	rs12797853;rs11604358;rs4103567;rs7927965	6
1*	ENSG00000255532	CTD-2026G22.1	11	49327266	49401221	1	pseudogene					53	10.48	0					6.667e-304	rs10901912;rs4103567;rs12797853	6
1*	ENSG00000123447	TYRL	11	49426527	49437299	-1	pseudogene		TYRL			2	1.564	0						rs10901912;rs12797853	6
1*	ENSG00000205035	RP11-707M1.1	11	49580098	49831971	1	pseudogene	440040				309	13.4	0					4.414e-23	rs12797853;rs10901912;rs1602115	6
1*	ENSG00000254487	RP11-707M1.7	11	49839330	49847105	1	pseudogene					18	5.826	0					1.351e-22	rs12797853;rs10901912;rs1602115	6
1*	ENSG00000255268	RP11-707M1.9	11	49846391	49848276	-1	pseudogene					2	5.826	0						rs1602115;rs10901912	6
1*	ENSG00000219061	TRIM51FP	11	49854692	49860872	-1	pseudogene		TRIM51FP			16	4.548	0					4.842e-23	rs10901912;rs12797853;rs1602115	6
1*	ENSG00000254714	RP11-163O19.1	11	49872181	49884080	1	pseudogene					41	14.03	0						rs10901912;rs12797853	6
1*	ENSG00000255550	RP11-163O19.11	11	49875632	49880954	-1	pseudogene					20	4.832	0						rs10901912;rs12797853	6
1*	ENSG00000255214	RP11-163O19.10	11	49893378	49895619	-1	pseudogene					7	1.769	0						rs10901912;rs12797853	6
1*	ENSG00000255190	TRIM51DP	11	49896497	49898190	1	pseudogene		TRIM51DP			7	5.069	0					4.603e-23	rs10901912;rs12797853	6
1*	ENSG00000254800	RP11-163O19.3	11	49904551	49905645	1	pseudogene					3	1.092	0						rs10901912	6
1*	ENSG00000255111	RP11-163O19.8	11	49913814	49915329	-1	pseudogene					2	4.576	0						rs10901912	6
1*	ENSG00000254408	OR4A1P	11	49919819	49920738	-1	pseudogene		OR4A1P			2	0.69	0						rs10901912	6
1*	ENSG00000254472	OR4A49P	11	49936565	49937196	-1	pseudogene		OR4A49P			1	5.163	0						rs12797853	6
1*	ENSG00000254637	OR4A18P	11	49938943	49940030	-1	pseudogene		OR4A18P			1	2.024	0						rs10901912	6
1*	ENSG00000254940	OR4A19P	11	49941864	49942966	-1	pseudogene		OR4A19P			2	12.54	0						rs12797853;rs10901912	6
1*	ENSG00000254624	OR4R3P	11	49944601	49945438	1	pseudogene		OR4R3P			2	12.47	0						rs10901912;rs1602115	6
1*	ENSG00000258817	OR4C13	11	49973943	49974971	1	protein_coding	283092	OR4C13	8.59263e-09	0.286924	1	1.183	0						rs12797853	6
1*	ENSG00000221954	OR4C12	11	50003009	50004071	-1	protein_coding	283093	OR4C12	0.238213	0.0402321	1	13.41	0						rs10901912	6
1*	ENSG00000255199	RP11-227P3.1	11	50060063	50062069	-1	pseudogene					1	2.042	0						rs10901912	6
1*	ENSG00000255442	RP11-347H15.1	11	50129327	50149612	1	pseudogene					41	7.398	0					9.012e-24	rs76209387;rs10901912;rs12797853	6
1*	ENSG00000236919	RP11-347H15.6	11	50205725	50206932	-1	pseudogene					2	7.049	0						rs10901912	6
1*	ENSG00000255500	RP11-347H15.2	11	50227332	50228444	1	pseudogene					1	7.843	0						rs10901912	6
1*	ENSG00000255042	RP11-347H15.5	11	50246832	50254505	-1	pseudogene	441601				7	12.91	0						rs12797853;rs10901912	6
1*	ENSG00000254518	RP11-347H15.4	11	50257750	50263827	1	lincRNA					9	5.755	0						rs10901912;rs12797853	6
1*	ENSG00000254840	RP11-574M7.1	11	50266852	50320877	1	pseudogene					68	11	0					4.616e-24	rs12797853;rs10901912;rs1602115	6
1*	ENSG00000214883	RP11-574M7.2	11	50368213	50381487	1	pseudogene					27	9.68	0					3.725e-23	rs10901912;rs76209387;rs12797853	6
1*	ENSG00000221840	OR4A5	11	51411378	51412448	-1	protein_coding	81318	OR4A5		0.0387788	2	13.16	0						rs76209387	6
1*	ENSG00000255349	OR4A7P	11	51425921	51426830	-1	pseudogene		OR4A7P			5	7.723	0						rs10902371;rs76209387	6
1*	ENSG00000225997	OR4A8P	11	51435459	51436403	-1	polymorphic_pseudogene		OR4A8P			1	0.166	0						rs76209387	6
1*	ENSG00000227547	OR4A2P	11	51451070	51451982	-1	pseudogene		OR4A2P			2	0.107	0						rs10902371	6
1*	ENSG00000254464	OR4A3P	11	51455830	51456700	-1	pseudogene		OR4A3P			1	6.636	0						rs10902371	6
1*	ENSG00000254769	OR4A4P	11	51458685	51459614	-1	pseudogene		OR4A4P			1	0.306	0						rs76209387	6
1*	ENSG00000255312	OR4C7P	11	51483325	51484243	1	pseudogene		OR4C7P			4	5.904	0						rs76209387;rs10902371	6
1*	ENSG00000185926	OR4C46	11	51515282	51516211	1	protein_coding	119749	OR4C46	8.76631e-07	0.331606	5	22.3	0						rs76209387;rs10902371	6
1*	ENSG00000237610	OR4C50P	11	51526871	51527800	-1	pseudogene		OR4C50P			3	7.418	0						rs76209387	6
1*	ENSG00000150244	TRIM48	11	55029658	55038595	1	protein_coding	101930235	TRIM48	1.77342e-14	1.12355	4	1.253	0						rs1216213;rs28681529	7
1*	ENSG00000255283	RP11-72M10.4	11	55046923	55052999	-1	pseudogene					6	1.746	0					2.247e-21	rs28681529;rs1216213	7
1*	ENSG00000254696	RP11-72M10.7	11	55049978	55050453	1	pseudogene					1	1.614	0					2.247e-21	rs1216213	7
1*	ENSG00000166007	TRIM51HP	11	55059359	55065746	-1	pseudogene	440041	TRIM51HP			7	1.532	0						rs28681529;rs1216213	7
1*	ENSG00000254828	RP11-72M10.5	11	55069766	55072536	-1	pseudogene					1	0.017	0						rs1216213	7
1*	ENSG00000181961	OR4A16	11	55110627	55111707	1	protein_coding	81327	OR4A16	2.6134e-05	-0.185877	2	12.37	0						rs1216213	7
1*	ENSG00000255196	OR4A17P	11	55211911	55212814	1	pseudogene		OR4A17P			2	2.204	0						rs28681529;rs1216213	7
1*	ENSG00000181950	OR4A13P	11	55234247	55235188	1	pseudogene		OR4A13P			1	0.223	0						rs28681529	7
1*	ENSG00000181943	OR4A21P	11	55258628	55259618	1	pseudogene		OR4A21P			1	2.254	0						rs1216213	7
1*	ENSG00000233301	OR4C14P	11	55304478	55305400	1	pseudogene		OR4C14P			1	10.15	0						rs11228263	7
1*	ENSG00000181939	OR4C15	11	55321783	55322895	1	protein_coding	81309	OR4C15	3.3941e-11	0.122703	1	3.376	0						rs11228263	7
1*	ENSG00000181935	OR4C16	11	55339604	55340536	1	protein_coding	219428	OR4C16		0.533093	3	37	0					1.068e-21	rs11228263;rs1216213	7
1*	ENSG00000181927	OR4P4	11	55405834	55406772	1	protein_coding	81300	OR4P4	0.0573838	-0.104539	1	33	0						rs11230593	7
1*	ENSG00000174982	OR4S2	11	55418380	55419315	1	protein_coding	219431	OR4S2	0.0010386	0.091799	1	26.4	0						rs11230593	7
1*	ENSG00000181903	OR4C6	11	55432614	55433671	1	protein_coding	219432	OR4C6	1.08194e-05	0.0428578	1	16.85	0						rs11228263	7
1*	ENSG00000254841	OR4V1P	11	55441012	55442151	1	pseudogene		OR4V1P			1	0.019	0						rs11230593	7
1*	ENSG00000188439	OR4P1P	11	55450715	55451850	1	pseudogene		OR4P1P			2	1.948	0						rs9651721;rs11230593	7
1*	ENSG00000254804	RP11-674C21.9	11	55451617	55453636	-1	lincRNA					4	3.391	0						rs11230593;rs9651721	7
1*	ENSG00000254457	OR5D2P	11	55482472	55483108	1	pseudogene		OR5D2P			2	9.906	0						rs9651721	7
1*	ENSG00000186886	OR5D3P	11	55493594	55494634	1	pseudogene		OR5D3P			6	13.23	0						rs9651721	7
1*	ENSG00000181837	OR5D17P	11	55522452	55523433	1	pseudogene		OR5D17P			17	12.62	0						rs9651721;rs57377676;rs11230593	7
1*	ENSG00000255019	OR5D15P	11	55554440	55555381	1	pseudogene		OR5D15P			1	0.001	0						rs9651721	7
1*	ENSG00000186113	OR5D14	11	55563032	55563976	1	protein_coding	219436	OR5D14	0.000814345	-0.102065	2	11.44	0						rs9651721	7
1*	ENSG00000186117	OR5L1	11	55578854	55579952	1	protein_coding	219437	OR5L1	5.9392e-07	0.441477	5	16.09	0						rs9651721	7
1*	ENSG00000186119	OR5D18	11	55587086	55588073	1	protein_coding	219438	OR5D18	0.000954998	0.0741843	1	9.887	0						rs11228263	7
1*	ENSG00000205030	OR5L2	11	55594695	55595630	1	protein_coding	26338	OR5L2	0.000593861	0.123388	7	21.2	0						rs9651721	7
1*	ENSG00000205029	OR5D16	11	55606228	55607214	1	protein_coding	390144	OR5D16	2.33685e-07	0.32122	2	6.334	0						rs10897182;rs57377676;rs11230593	7
1*	ENSG00000255204	RP11-738O11.9	11	55631408	55648719	1	pseudogene					30	11.96	0						rs11228263;rs9651721;rs57377676;rs11230593;rs28681529	7
1*	ENSG00000254547	RP11-738O11.13	11	55635045	55642013	-1	pseudogene					15	11.96	0						rs9651721;rs28681529	7
1*	ENSG00000124900	TRIM51	11	55650773	55659286	1	protein_coding	84767	TRIM51	1.04918e-05		10	10.72	0						rs9651721;rs10897182;rs57377676;rs11230593;rs11228263	7
1*	ENSG00000187612	OR5W2	11	55681126	55682058	-1	protein_coding	390148	OR5W2	0.0488123	0.336193	2	15.07	0						rs9651721	7
1*	ENSG00000167825	OR5I1	11	55702932	55703876	-1	protein_coding	10798	OR5I1	0.237661	0.340832	2	24.3	0						rs9651721	7
1*	ENSG00000255416	OR10AF1P	11	55715596	55716400	-1	pseudogene		OR10AF1P			1	4.158	0						rs9651721	7
1*	ENSG00000214880	OR7E5P	11	55746179	55753881	-1	pseudogene	219445	OR7E5P			9	4.433	0						rs57377676;rs11230593;rs10897182;rs9651721	7
1*	ENSG00000149133	OR5F1	11	55761157	55762101	-1	protein_coding	338674	OR5F1	0.00647381	0.117291	1	20.3	0						rs9651721	7
1*	ENSG00000182365	OR5F2P	11	55782493	55783433	-1	pseudogene		OR5F2P			3	14.08	0						rs9651721	7
1*	ENSG00000225538	OR5BE1P	11	55850277	55851215	1	pseudogene		OR5BE1P			1	3.53	0						rs57377676;rs11230593	7
1*	ENSG00000181767	OR8H2	11	55872519	55873457	1	protein_coding	390151	OR8H2	0.000858972	1.57394	1	13.64	0					5.674e-83	rs28681529	7
1*	ENSG00000255140	OR5BN2P	11	55884115	55884732	-1	pseudogene		OR5BN2P			1	1.545	0						rs57377676;rs11230593	7
1*	ENSG00000213604	RP11-444K7.8	11	55972601	55973101	-1	pseudogene					1	6.835	0						rs9651721	7
1*	ENSG00000181718	OR5T2	11	55999490	56000737	-1	protein_coding	219464	OR5T2	0.00107907	0.00394798	2	10.03	0						rs9651721;rs11228263	7
1*	ENSG00000181698	OR5T1	11	56043029	56044146	1	protein_coding	390155	OR5T1	0.00013089	0.216227	1	0.757	0						rs57377676	7
1*	ENSG00000181693	OR8H1	11	56057529	56058566	-1	protein_coding	219469	OR8H1	1.46607e-05	0.0494593	1	0.474	0					5.253e-37	rs57377676;rs11230593;rs4479008	7
1*	ENSG00000254722	FAM8A2P	11	56098823	56099964	-1	pseudogene		FAM8A2P			1	7.495	0						rs57377676	7
1*	ENSG00000255134	OR8K2P	11	56102618	56103544	1	pseudogene		OR8K2P			2	13.55	0						rs9651721;rs57377676	7
1*	ENSG00000150261	OR8K1	11	56113421	56114507	1	protein_coding	390157	OR8K1	0.00203916	0.0505999	2	17.16	0						rs57377676	7
1*	ENSG00000172487	OR8J1	11	56127691	56128764	1	protein_coding	219477	OR8J1	4.47462e-06	0.252969	1	3.272	0						rs9651721	7
1*	ENSG00000172199	OR8U1	11	56143100	56144029	1	protein_coding	219417	OR8U1	0.0134541	0.325066	3	0.401	0						rs57377676;rs9651721	7
1*	ENSG00000255466	OR5AL2P	11	56161205	56162124	1	pseudogene		OR5AL2P			5	15.18	0						rs28681529;rs57377676;rs9651721	7
1*	ENSG00000272987	OR5AL1	11	56180172	56181156	1	polymorphic_pseudogene					3	16.37	0						rs9651721	7
1*	ENSG00000181395	OR5AL1	11	56180220	56181144	1	pseudogene		OR5AL1			3	16.37	0						rs9651721	7
1*	ENSG00000174942	OR5R1	11	56184734	56185708	-1	protein_coding	219479	OR5R1	2.18603e-05	0.108645	3	16.8	0						rs57377676;rs9651721;rs28681529	7
1*	ENSG00000185701	OR5M5P	11	56294044	56294979	-1	pseudogene		OR5M5P			1	3.178	0					3.936e-23	rs4479008	7
1*	ENSG00000255223	OR5M11	11	56309746	56310757	-1	protein_coding	219487	OR5M11	0.00076255	0.03827	1	8.631	0						rs9651721	7
1*	ENSG00000255012	OR5M1	11	56380031	56380978	-1	protein_coding	390168	OR5M1	0.0473827	0.317189	1	22.8	0						rs57377676;rs4479008	7
1*	ENSG00000172459	OR5AR1	11	56431138	56432163	1	protein_coding	219493	OR5AR1	0.000179721	0.0475708	2	36	0						rs28681529;rs9651721;rs1943637	7
1*	ENSG00000174914	OR9G1	11	56467864	56468781	1	protein_coding	390174	OR9G1	0.000995316	0.109854	4	20.9	0						rs28681529	7
1*	ENSG00000254953	RP11-100N3.2	11	56503792	56503938	-1	pseudogene					1	15.58	0						rs61902472;rs61902518	7
1*	ENSG00000181325	OR9G3P	11	56507655	56508572	1	pseudogene		OR9G3P			4	16.54	0					1.991e-23	rs61902472;rs61902518	7
1*	ENSG00000254825	OR9G2P	11	56518499	56519378	-1	pseudogene		OR9G2P			2	7.063	0						rs1943637;rs61902518	7
1*	ENSG00000181296	OR5G1P	11	56542737	56543682	-1	pseudogene		OR5G1P			2	14.72	0					5.683e-226	rs1943637	7
1*	ENSG00000205025	OR5G5P	11	56569332	56587184	-1	pseudogene		OR5G5P			21	14.9	0					2.872e-186	rs61902518;rs1943637;rs141394107	7
1*	ENSG00000241356	OR5G3	11	56587052	56587980	-1	polymorphic_pseudogene		OR5G3			1	11.67	0					2.872e-186	rs1943637	7
1*	ENSG00000255433	AP000479.1	11	56615954	56645554	1	lincRNA	101927120				24	9.079	0					1.716e-47	rs61902518;rs1943637;rs1783443;rs17640952;rs1938746	7
1*	ENSG00000181273	OR5AK2	11	56756347	56757342	1	protein_coding	390181	OR5AK2	2.87905e-07	-0.138667	1	1.084	0						rs7925718	7
1*	ENSG00000273228	OR5BQ1P	11	56796883	56797197	1	pseudogene		OR5BQ1P			1	0.39	0						rs7925718	7
1*	ENSG00000134817	APLNR	11	57001051	57004709	-1	protein_coding	187	APLNR	0.43246	0.741685	1	0.589	0						rs57944700	7
1*	ENSG00000149115	TNKS1BP1	11	57067112	57092426	-1	protein_coding	85456	TNKS1BP1	0.0297109	-0.277863	12	12.83	0					6.116e-61	rs7931298;rs75419177;rs142488978	7
1*	ENSG00000149136	SSRP1	11	57093459	57103351	-1	protein_coding	6749	SSRP1	0.999693	-0.546304	2	6.428	0						rs118113160;rs75419177	7
1*	ENSG00000109991	P2RX3	11	57105848	57138073	1	protein_coding	5024	P2RX3	0.0114976	-0.175016	41	15.21	0					1.174e-31	11:57966721;rs7931298;rs118113160;rs142488978	7
1*	ENSG00000186907	RTN4RL2	11	57228022	57245007	1	protein_coding	349667	RTN4RL2	0.975815		1	12.72	0					9.356e-12	rs554171904	7
1*	ENSG00000149150	SLC43A1	11	57252007	57283259	-1	protein_coding	8501	SLC43A1	7.85327e-05	-0.136928	1	0.96	0						11:57966721	7
1*	ENSG00000134809	TIMM10	11	57295936	57298276	-1	protein_coding	26519	TIMM10	0.00949476	0.000100078	0	0	46	5.20724e-09	2.17352e-18	GTEx/v8/Cells_EBV-transformed_lymphocytes:GTEx/v8/Whole_Blood	+	3.359e-12	rs4938884	7
1*	ENSG00000172409	CLP 1	11	57416465	57429340	1	protein_coding	10978	CLP 1	0.937605	-0.832602	1	10.85	0						rs74576214;rs151272344	7
1*	ENSG00000156599	ZDHHC5	11	57435219	57468659	1	protein_coding	25921	ZDHHC5	0.999924	-0.831025	1	17.38	0						rs144755777	7
1*	ENSG00000213593	TMX2	11	57480072	57508445	1	protein_coding	51075	TMX2	0.429914	0.120517	1	3.993	0						rs554171904	7
1*	ENSG00000254462	TMX2-CTNND1	11	57480077	57559058	1	protein_coding		TMX2-CTNND1			1	3.993	0						rs554171904	7
1*	ENSG00000186509	OR9Q1	11	57791353	57949088	1	protein_coding	219956	OR9Q1	0.0085949	0.818099	50	8.932	0					5.33e-19	rs4938884;11:57966721;rs151272344;rs79259591	7
1*	ENSG00000236541	VN2R9P	11	57808180	57809132	-1	pseudogene		VN2R9P			1	0.199	0						rs4938884	7
1*	ENSG00000255146	RP11-659P15.1	11	57811582	57827610	-1	lincRNA					6	4.286	0						rs4938884;11:57966721	7
1*	ENSG00000254853	RP11-659P15.2	11	57839850	57842910	-1	pseudogene					1	3.081	0						rs4938884	7
1*	ENSG00000272685	OR9I3P	11	57876192	57877133	-1	pseudogene		OR9I3P			1	8.932	0						rs4938884	7
1*	ENSG00000255299	RP11-655C2.3	11	58265361	58273231	-1	lincRNA					1	2.511	0						rs79259591	7
1*	ENSG00000110031	LPXN	11	58294344	58345693	-1	protein_coding	9404	LPXN	0.0172004	-0.501834	3	6.367	0					2.591e-17	rs79259591	7
1*	ENSG00000149124	GLYAT	11	58407899	58499447	-1	protein_coding	10249	GLYAT	8.03824e-05	-0.431791	2	11.12	0					1.907e-17	rs144755777;11:57966721	7
2	ENSG00000145996	CDKAL1	6	20534688	21232635	1	protein_coding	54901	CDKAL1	0.57765	0.904338	1	1.766	0					3.085e-08	rs201313	1
2	ENSG00000272168	CASC15	6	21665003	22214734	1	lincRNA	401237	CASC15			137	18.13	0					3.395e-61	rs149144618;rs1857118;rs72826303;rs11759616;rs6906731;rs7760082;rs11751260;rs9350410;rs17261487;rs6901423	1
2	ENSG00000260049	RP3-404K8.2	6	22260653	22318027	1	antisense					4	5.154	0					6.743e-67	rs1857118;rs149144618;rs2655446	1
2	ENSG00000233358	RP1-209A6.1	6	22744624	23032009	-1	lincRNA					47	14.7	0					4.605e-125	rs9358581;rs116631002;rs36029180;rs7762064	1
2	ENSG00000152954	NRSN1	6	24126350	24155128	1	protein_coding	140767	NRSN1	0.00430725	1.41196	17	7.707	0					6.241e-135	rs12662101;rs12196541;rs3178;rs148847524;rs61528653;6:25003339	1
2	ENSG00000146038	DCDC2	6	24171984	24358280	-1	protein_coding	51473	DCDC2	1.04849e-05	2.52398	110	17.45	0					1.981e-183	rs148847524;rs61528653;rs78612998;rs1622103;6:25003339;rs12196541;rs143231436;rs3846829;rs150895593;rs138191414;rs78120860	1
2	ENSG00000124532	MRS2	6	24403153	24425810	1	protein_coding	57380	MRS2	8.84583e-05	2.37027	80	14.89	176	3.13583e-18	1.6489e-13	GTEx/v8/Whole_Blood	-	5.483e-166	rs7754778;rs6942189;rs138191414;rs6456614;6:25003339;rs9467176;rs760904	1
2	ENSG00000112293	GPLD1	6	24424793	24495433	-1	protein_coding	2822	GPLD1	5.63948e-09	0.977323	207	12.49	38	4.2579e-07	0.00114471	GTEx/v8/Whole_Blood		5.483e-166	rs7754778;rs138191414;rs6942189;rs2793444;rs150895593;rs78120860;rs138711481;rs6456614;rs9467176;rs760904;rs2744563;rs9467203;rs807541;rs7765052	1
2	ENSG00000112294	ALDH5A1	6	24495080	24537435	1	protein_coding	7915	ALDH5A1	0.00290426	1.09363	69	13.35	263	1.46939e-23	1.91041e-18	GTEx/v8/Cells_EBV-transformed_lymphocytes:GTEx/v8/Whole_Blood	+	5.483e-166	rs9467203;rs2793444;rs760904;rs9467176;rs807531;rs7754778;rs6942189;rs6456614	1
2	ENSG00000137261	KIAA0319	6	24544332	24646383	-1	protein_coding	9856	KIAA0319	7.95793e-12	1.6839	77	23.1	4	1.3592e-12	1.37987e-18	GTEx/v8/Whole_Blood	+	8.51e-64	rs807531;rs807541;rs9467176;6:25003339;rs138191414;rs6902039;rs2760135;rs139126471;rs7771169;rs56895808;rs7765052;rs3181238	1
2	ENSG00000218186	KRT8P43	6	24598240	24600018	1	pseudogene		KRT8P43			1	6.746	1	3.43655e-06	1.16389e-06	GTEx/v8/Whole_Blood			rs2760135;rs3181238	1
2	ENSG00000111802	TDP2	6	24650205	24667261	-1	protein_coding	51567	TDP2	0.000137008	0.245868	35	21.3	38	5.62002e-07	0.00138894	GTEx/v8/Whole_Blood	+	3.513e-31	rs3087943;rs7765052;rs3181238	1
2	ENSG00000112304	ACOT13	6	24667263	24705293	1	protein_coding	55856	ACOT13	3.4293e-05	0.981955	18	11.52	0					3.513e-31	rs7765052;rs3181238;rs139126471	1
2	ENSG00000112308	C6orf62	6	24705089	24721064	-1	protein_coding	81688	C6orf62	0.946557	-0.70031	4	8.143	24	5.32349e-14	3.28504e-25	GTEx/v8/Whole_Blood	-	4.617e-32	rs7765052;rs3181238;rs6910956;rs3813680;rs9467438	1
2	ENSG00000112312	GMNN	6	24775159	24786327	1	protein_coding	51053	GMNN	0.607454	0.172626	8	10.92	0					3.624e-44	rs1980643;rs2493333;rs6910956	1
2	ENSG00000260286	C6orf229	6	24797549	24799117	-1	protein_coding	101928603	C6orf229			1	9.903	0						rs2754772	1
2	ENSG00000111913	FAM65B	6	24797601	25042238	-1	protein_coding	9750	FAM65B	0.97131	0.949896	297	22.6	9	9.72209e-08	4.25718e-05	GTEx/v8/Whole_Blood	-	2.645e-174	rs2754772;rs2493333;rs139126471;rs6910956;rs61528548;rs10946731;rs3813680;6:25003339;rs9393592;rs4431425;rs2817726;rs150895593;rs55927112;rs13202601;rs647297;rs387628;rs402518;rs9348651;rs117518521;rs148672910;rs9356958;rs74378127;rs9356960	1
2	ENSG00000214975	PPIAP29	6	24976647	24977210	1	pseudogene		PPIAP29			2	12.3	4	6.04411e-11	2.26741e-13	GTEx/v8/Whole_Blood	+	4.487e-20	rs139126471;rs9348651;rs55927112;rs647297	1
2	ENSG00000272053	RP11-367G6.3	6	25015180	25042398	-1	lincRNA					64	14.16	0					2.645e-174	rs9356958;rs117518521;rs74378127;rs9356960	1
2	ENSG00000220517	ASS1P1	6	25023475	25024711	-1	pseudogene		ASS1P1			5	9.656	0						rs9356958;rs74378127	1
2	ENSG00000229313	RP3-425P12.5	6	25042067	25056892	1	antisense					4	7.781	0						rs117510375;rs9356960	1
2	ENSG00000230372	RP3-425P12.2	6	25061853	25063735	-1	lincRNA					1	0.004	0						rs9356960	1
2	ENSG00000168405	CMAHP	6	25081548	25166793	-1	pseudogene	8418	CMAHP			30	10.54	10	7.83583e-08	4.38189e-10	GTEx/v8/Cells_EBV-transformed_lymphocytes:GTEx/v8/Whole_Blood	-	2.986e-67	rs12198209;rs302971;rs117510375;rs148672910;rs3749873;rs59401719;rs150895593;rs9356960	1
2	ENSG00000219682	RP3-425P12.4	6	25140212	25141649	1	pseudogene					2	10.54	0					1.2e-28	rs148672910;rs3749873	1
2	ENSG00000235733	RP3-522P13.3	6	25245584	25261639	-1	antisense	101928663				1	0.136	0					2.248e-30	rs80272928	1
2	ENSG00000213972	RP3-522P13.2	6	25272428	25273979	-1	pseudogene					6	19.71	0						rs9358849;rs78904078	1
2	ENSG00000079691	LRRC16A	6	25279306	25620758	1	protein_coding	55604	LRRC16A	0.502319	0.400707	566	16.67	55	2.13345e-20	1.36744e-31	GTEx/v8/Cells_EBV-transformed_lymphocytes:GTEx/v8/Whole_Blood	+	2.537e-287	rs78904078;rs2690112;rs9358849;rs6936496;rs2690123;rs10456320;rs139581790;rs2744306;rs11754685;rs2744233;rs6456671;rs148025681;rs2690098;rs4712922;rs4711082;rs1927695;rs72830743;rs73387233;rs4712929;rs77551782;rs927986;rs146458991;rs1927693;rs9366624;rs11752825;rs62392388;rs12213948;rs76417859;rs72831251;rs7761140;rs76448003;rs384340;rs301394;rs79484327;rs16890663;rs374087;rs301374;rs214066;rs941…	1
2	ENSG00000207490	RNU6-987P	6	25383827	25383930	1	snRNA		RNU6-987P			2	4.83	0						rs72830743	1
2	ENSG00000238322	snoU13	6	25435508	25435590	1	snoRNA					2	4.637	0					1.825e-22	rs76417859;rs76448003	1
2	ENSG00000079689	SCGN	6	25652464	25702011	1	protein_coding	10590	SCGN	0.035946	0.102936	55	11.9	0					5.897e-144	rs79484327;rs941428;rs9393654;rs932316;rs148025681;rs7754944;rs191929921;rs6456691;rs9358870	1
2	ENSG00000217408	PRELID1P2	6	25678997	25679392	-1	pseudogene		PRELID1P2			1	9.322	0						rs9393654	1
2	ENSG00000146047	HIST1H2BA	6	25727137	25727573	1	protein_coding	255626	HIST1H2BA	0.132824	0.401921	2	3.535	0					9.435e-07	rs191929921;rs6456691	1
2	ENSG00000146039	SLC17A4	6	25754927	25781419	1	protein_coding	10050	SLC17A4	6.33423e-06	0.944836	23	9.141	0					6.098e-05	rs6456691;rs191929921;rs79484327;rs4573076	1
2	ENSG00000124568	SLC17A1	6	25783125	25832287	-1	protein_coding	6568	SLC17A1	2.59261e-10	-0.181263	17	12.38	0					3.217e-121	rs79484327;rs4573076;rs12211184;rs116956053	1
2	ENSG00000124564	SLC17A3	6	25833294	25882514	-1	protein_coding	10786	SLC17A3	9.88206e-14	-0.246503	45	14.83	0					5.2e-120	rs72832571;rs79484327;rs4573076;rs12211184;rs148025681	1
2	ENSG00000112337	SLC17A2	6	25912982	25930946	-1	protein_coding	10246	SLC17A2	0.00466985	-0.129201	7	6.003	0					1.686e-158	rs72832571;rs79484327;rs7740793	1
2	ENSG00000112343	TRIM38	6	25963030	25987384	1	protein_coding	10475	TRIM38	4.7513e-06	-0.220583	25	35	64	6.84618e-12	2.71219e-11	GTEx/v8/Whole_Blood	+	9.731e-81	rs79008907;rs12210098;rs7740793;rs79484327;rs2008668;rs72832571;rs9393654;rs9467676;rs4145878;rs17737028	1
2	ENSG00000272558	U91328.21	6	25984040	25999395	-1	antisense					17	8.229	0						rs12210098;rs2008668;rs79484327;rs79008907;rs7740793;rs72832571	1
2	ENSG00000272065	U91328.20	6	25990989	25991454	1	lincRNA					1	0.383	0						rs79008907	1
2	ENSG00000272462	U91328.19	6	25992890	26002003	1	lincRNA					7	6.741	111	5.37289e-10	2.19136e-09	GTEx/v8/Cells_EBV-transformed_lymphocytes:GTEx/v8/Whole_Blood	+	2.206e-78	rs2008668;rs79484327;rs79008907;rs12210098;rs12211184;rs72834629;rs2690098;rs4712929;rs9358870;rs7740793;rs9467676;rs9467788;rs17737028	1
2	ENSG00000272810	U91328.22	6	26013469	26013985	1	lincRNA					3	5.131	2	0.000218697	0.00933253	GTEx/v8/Whole_Blood			rs72834629;rs79008907;rs2008668;rs79484327;rs12207674;rs932316	1
2	ENSG00000198366	HIST1H3A	6	26020718	26021186	1	protein_coding	8968	HIST1H3A	3.98008e-05	-0.225707	3	14.45	0						rs79008907;rs2008668;rs79484327	1
2	ENSG00000196176	HIST1H4A	6	26021907	26022278	1	protein_coding	554313	HIST1H4A	0.0022854	0.43417	1	15.82	0						rs79008907	1
2	ENSG00000124693	HIST1H3B	6	26031817	26032288	-1	protein_coding	8968	HIST1H3B	0.307283	0.251696	1	0.631	0						rs148025681	1
2	ENSG00000196226	HIST1H2BB	6	26043455	26043885	-1	protein_coding	3018	HIST1H2BB	0.130328	0.288117	1	22.3	0						rs148025681	1
2	ENSG00000196532	HIST1H3C	6	26045639	26046097	1	protein_coding	8968	HIST1H3C	0.215541	-0.193879	1	0.084	0					1.188e-155	rs9467676	1
2	ENSG00000187837	HIST1H1C	6	26055968	26056699	-1	protein_coding	3006	HIST1H1C		0.137228	5	24.4	0						rs72834629;rs2008668;rs79484327;rs148025681;rs79008907;rs9467676	1
2	ENSG00000010704	HFE	6	26087509	26098571	1	protein_coding	3077	HFE	8.49697e-07	0.210172	11	12.81	0					3.183e-154	rs79008907;rs9467676;rs9467788;rs198846;rs72832571;rs72834629	1
2	ENSG00000197061	HIST1H4C	6	26104104	26104518	1	protein_coding	554313	HIST1H4C	8.85617e-05	0.852192	1	13.32	0						rs72834629	1
2	ENSG00000187475	HIST1H1T	6	26107640	26108364	-1	protein_coding	3010	HIST1H1T		-0.0680391	1	15.9	1	0.000285766	0.00207764	GTEx/v8/Whole_Blood			rs9467676	1
2	ENSG00000180596	HIST1H2BC	6	26115101	26124154	-1	protein_coding	8347	HIST1H2BC	0.00287801	0.335736	14	11.84	0						rs72834629;rs198846;rs72832571;rs9467676;rs2008668;rs79484327;rs148025681;rs9467788	1
2	ENSG00000180573	HIST1H2AC	6	26124373	26139344	1	protein_coding	8334	HIST1H2AC	0.599176	0.739679	27	7.929	0					1.561e-178	rs9467788;rs198846;rs72834629;rs9467676;rs117965842	1
2	ENSG00000168298	HIST1H1E	6	26156559	26157343	1	protein_coding	3008	HIST1H1E		-0.396522	2	24.7	0						rs148025681;rs77704135	1
2	ENSG00000158373	HIST1H2BD	6	26158349	26171577	1	protein_coding	3017	HIST1H2BD	0.000277979	-0.0152977	34	17.32	69	2.8816e-19	1.38108e-21	GTEx/v8/Whole_Blood	-	7.903e-208	rs2008668;rs79484327;rs9379831;rs9393654;rs72834629;rs806794;rs4145878;rs55964643;rs12201802;rs4434463	1
2	ENSG00000217159	LARP1P1	6	26164300	26164591	1	pseudogene		LARP1P1			1	9.004	0						rs2008668;rs79484327	1
2	ENSG00000197697	HIST1H2BE	6	26183958	26184454	1	protein_coding	8347	HIST1H2BE	0.000307872	0.445738	2	22.4	0						rs75546109;rs806794	1
2	ENSG00000188987	HIST1H4D	6	26188938	26189304	-1	protein_coding	554313	HIST1H4D	0.0022643	0.870145	1	23.3	0						rs148025681	1
2	ENSG00000197409	HIST1H3D	6	26197068	26199521	-1	protein_coding	8968	HIST1H3D	0.0111951		7	16.35	0					8.625e-12	rs75546109;rs4145878;rs2008668;rs79484327	1
2	ENSG00000196866	HIST1H2AD	6	26199079	26199471	-1	protein_coding	3013	HIST1H2AD	3.99677e-05	0.287759	2	16.35	0						rs75546109;rs2008668;rs79484327	1
2	ENSG00000197846	HIST1H2BF	6	26199748	26200942	1	protein_coding	8347	HIST1H2BF	0.00030002	0.851063	2	21.1	0					7.903e-208	rs4145878;rs806794	1
2	ENSG00000198518	HIST1H4E	6	26204858	26206266	1	protein_coding	554313	HIST1H4E	0.000642251	1.83578	3	9.856	0					1.117e-23	rs4145878;rs2008668;rs79484327;rs9393687	1
2	ENSG00000187990	HIST1H2BG	6	26216428	26216872	-1	protein_coding	8347	HIST1H2BG	2.94452e-06	0.0253452	1	17.53	0						rs2008668;rs79484327	1
2	ENSG00000218281	HIST1H2APS3	6	26233350	26233483	1	pseudogene		HIST1H2APS3			1	3.863	0						rs806794	1
2	ENSG00000124575	HIST1H1D	6	26234440	26235216	-1	protein_coding	3007	HIST1H1D		0.136123	2	17.45	0						rs2008668;rs79484327	1
2	ENSG00000198327	HIST1H4F	6	26240561	26240976	1	protein_coding	554313	HIST1H4F	0.181985	1.06312	1	12.47	0						rs2008668;rs79484327	1
2	ENSG00000158406	HIST1H4H	6	26281283	26285762	-1	protein_coding	554313	HIST1H4H	0.00879033	1.05907	2	10.47	29	5.30765e-07	6.31015e-06	GTEx/v8/Whole_Blood	-	4.171e-136	rs2008668;rs79484327;rs9379831;rs4145878;rs806794	1
2	ENSG00000220875	HIST1H3PS1	6	26322104	26322520	-1	pseudogene		HIST1H3PS1			1	10.86	0						rs806794	1
2	ENSG00000186470	BTN3A2	6	26365387	26378546	1	protein_coding	11118	BTN3A2	0.000124519	2.20791	6	1.829	575	1.87444e-94	4.18669e-117	GTEx/v8/Cells_EBV-transformed_lymphocytes:GTEx/v8/Whole_Blood	+	1.129e-301	rs10946812;rs1796521;rs17737028;rs2008668;rs4434463;rs4712929;rs12213948;rs301374;rs214066;rs9393654;rs9467676;rs4145878;rs9467788;rs55964643;rs12201802;rs79484327;rs1056668;rs12194399;rs2130655;rs1156086;rs2092114;rs9368503;rs140366348	1
2	ENSG00000124508	BTN2A2	6	26383324	26395102	1	protein_coding	10385	BTN2A2	0.000150288	1.01572	6	5.031	5	3.8707e-06	0.000225756	GTEx/v8/Whole_Blood	-	5.786e-111	rs9467788;rs1796521;rs12201802;rs10946812	1
2	ENSG00000026950	BTN3A1	6	26402465	26415444	1	protein_coding	11119	BTN3A1	8.65114e-07	1.62791	17	6.567	35	3.80836e-10	7.84799e-09	GTEx/v8/Cells_EBV-transformed_lymphocytes:GTEx/v8/Whole_Blood	-	5.786e-111	rs9467788;rs12201802;rs1796519;rs1796521;rs2008668;rs79484327;6:26642117;rs10946812	1
2	ENSG00000124549	BTN2A3P	6	26421619	26432611	1	pseudogene	54718	BTN2A3P			9	12.45	7	1.02053e-06	0.00133434	GTEx/v8/Whole_Blood	+	1.846e-15	rs1796521;rs9467788;rs4434463;rs12201802;rs2008668;rs79484327;rs1796519	1
2	ENSG00000111801	BTN3A3	6	26440700	26453643	1	protein_coding	10384	BTN3A3	7.19025e-10	1.09011	13	6.844	0						rs2008668;rs79484327;rs9467788;rs12201802;rs1796521;rs1796519	1
2	ENSG00000112763	BTN2A1	6	26458150	26476849	1	protein_coding	11120	BTN2A1	1.07468e-18	0.260571	33	22.5	177	1.73705e-18	2.124e-50	GTEx/v8/Whole_Blood	-	1.129e-301	rs2008668;rs79484327;6:26642117;rs4434463;rs12201802;rs17737028;rs1056668;rs1796521;rs9467788;rs1796519;rs148071656;rs10946812;rs12194399	1
2	ENSG00000124557	BTN1A1	6	26501449	26510650	1	protein_coding	696	BTN1A1	1.14088e-09	-0.329705	20	12.08	0					1.129e-301	rs1056668;rs17737028;rs2008668;rs79484327;rs4434463	1
2	ENSG00000228223	HCG11	6	26522076	26526807	1	lincRNA	493812	HCG11			4	15.79	33	5.6722e-08	0.00011446	GTEx/v8/Whole_Blood	+	9.154e-171	rs1056668;rs3999347	1
2	ENSG00000261353	CTA-14H9.5	6	26527291	26527632	1	lincRNA					1	2.03	0						rs1056668	1
2	ENSG00000182952	HMGN4	6	26538633	26546482	1	protein_coding	10473	HMGN4	0.557082	-0.351003	12	13.36	466	1.14488e-43	2.51544e-34	GTEx/v8/Cells_EBV-transformed_lymphocytes:GTEx/v8/Whole_Blood	+	1.129e-301	rs1056668;rs4434463;rs12201802;rs1796519;rs75546109;rs9379831;rs4145878;rs10946812;rs1796521;rs12194399;rs3999347;rs2008668;rs1156086;rs2092114;rs140366348	1
2	ENSG00000146109	ABT1	6	26597180	26600278	1	protein_coding	29777	ABT1	0.0271056	0.104221	5	11.37	301	4.72896e-10	4.15662e-17	GTEx/v8/Cells_EBV-transformed_lymphocytes:GTEx/v8/Whole_Blood	+	5.664e-151	rs12194399;rs2130655;rs4434463;rs2008668;rs79484327;rs12201802;rs187242505;rs1156086;rs9348762;rs140366348	1
2	ENSG00000271071	RP11-457M11.6	6	26612131	26613337	-1	pseudogene					2	1.02	0						rs2008668;rs79484327;rs17737028	1
2	ENSG00000218346	VN1R14P	6	26630782	26632007	-1	pseudogene		VN1R14P			4	10.25	0						rs2008668;rs79484327;rs2130655;rs4434463;rs12194399	1
2	ENSG00000233631	RP11-457M11.2	6	26634611	26637008	-1	3prime_overlapping_ncrna					2	13.6	0						rs12194399	1
2	ENSG00000181315	ZNF322	6	26636518	26659980	-1	protein_coding	79692	ZNF322		-1.14047	30	13.43	249	1.6084e-21	1.08836e-20	GTEx/v8/Cells_EBV-transformed_lymphocytes:GTEx/v8/Whole_Blood	-	1.129e-301	rs12194399;rs2008668;rs2130655;rs4434463;6:26642117;rs3999347;rs79484327;rs1056668;rs1796519;rs1796521;rs9467788;rs12174489	1
2	ENSG00000261584	RP11-457M11.5	6	26686469	26688192	1	lincRNA	101929855				3	9.42	0						rs2130655;rs2008668;rs187242505;rs4434463	1
2	ENSG00000241549	GUSBP2	6	26839263	26924333	-1	pseudogene	387036	GUSBP2			248	13.25	42	2.86365e-22	3.88665e-16	GTEx/v8/Cells_EBV-transformed_lymphocytes:GTEx/v8/Whole_Blood	-	9.154e-171	rs12194399;rs17737028;rs9467788;rs2008668;rs187242505;rs2130655;rs4434463;rs3999347;rs1796519	1
2	ENSG00000243307	RP11-239L20.3	6	26864731	26866556	1	pseudogene					7	12.35	0						rs12194399;rs187242505;rs2130655;rs4434463;rs17737028;rs2008668	1
2	ENSG00000224843	LINC00240	6	26924771	26991703	1	lincRNA	100133205	LINC00240			130	13.96	0					1.068e-151	rs3999347;rs4434463;rs12194399;rs2008668;6:26642117;rs17737028	1
2	ENSG00000220581	VN1R12P	6	27001214	27002089	-1	pseudogene		VN1R12P			5	11.13	0						rs12194399;rs2008668;rs4434463	1
2	ENSG00000219770	VN1R11P	6	27051059	27051926	1	pseudogene		VN1R11P			1	5.129	0						rs4434463	1
2	ENSG00000124635	HIST1H2BJ	6	27093676	27100541	-1	protein_coding	8970	HIST1H2BJ	0.478842	0.308582	7	17.79	27	4.00453e-05	0.0125512	GTEx/v8/Whole_Blood		5.261e-09	rs4434463;rs12194399;rs189622978;rs1156086	1
2	ENSG00000197903	HIST1H2BK	6	27106073	27114619	-1	protein_coding	85236	HIST1H2BK	0.490754	-0.0430523	5	10.61	319	1.63987e-10	4.41227e-07	GTEx/v8/Whole_Blood	-	6.13e-179	rs4434463;rs2008668;rs10946812;rs12201802;rs2130655;rs187242505;rs1156086;rs9348762;rs2092114;rs140366348;rs142970147	1
2	ENSG00000184825	HIST1H2AH	6	27114861	27115317	1	protein_coding	85235	HIST1H2AH	6.29508e-05	0.19492	1	16.39	0						rs4434463	1
2	ENSG00000265565	MIR3143	6	27115405	27115467	1	miRNA	100422934	MIR3143			1	1.023	0					1.23e-81	rs17737028	1
2	ENSG00000174572	RP11-209A2.1	6	27179023	27179692	1	pseudogene					2	10.97	0						rs4434463	1
2	ENSG00000112812	PRSS16	6	27215480	27224403	1	protein_coding	10279	PRSS16	2.23792e-06	0.00884812	4	5.057	178	2.98128e-06	1.41935e-05	GTEx/v8/Whole_Blood	-	3.823e-106	rs2092114;rs1156086;rs4434463;rs2008668;rs12194399	1
2	ENSG00000270935	XXbac-BPGBPG24O18.1	6	27235892	27237008	1	pseudogene					1	0.947	0						rs2092114;rs1156086	1
2	ENSG00000158553	POM121L2	6	27253682	27279949	-1	protein_coding	94026	POM121L2		0.313408	29	14.01	0					1.782e-07	rs4434463;rs2092114;rs149260225;6:26642117;rs1156086;rs2008668;rs189622978;rs12174489	1
2	ENSG00000204789	ZNF204P	6	27325604	27339304	-1	pseudogene	7754	ZNF204P			18	13.33	8	1.07976e-05	0.0184877	GTEx/v8/Cells_EBV-transformed_lymphocytes:GTEx/v8/Whole_Blood		5.944e-147	rs9368503;rs573149595;rs140366348;rs4434463;rs7739987;rs2235359	1
2	ENSG00000124613	ZNF391	6	27342394	27371683	1	protein_coding	346157	ZNF391	9.25869e-07	1.23172	18	12.79	56	3.21946e-15	3.18104e-24	GTEx/v8/Whole_Blood	+	8.914e-248	rs9379966;rs573149595;rs140366348;rs9368503;rs74328437;rs9467788;rs2092114;rs1156086;rs12174489;rs12192568;rs9368537;rs184084677;rs9468267;rs1150691	1
2	ENSG00000271755	RP1-153G14.4	6	27371789	27374743	-1	lincRNA					1	0.299	0						rs149260225	1
2	ENSG00000096654	ZNF184	6	27418522	27440897	-1	protein_coding	7738	ZNF184	0.133749	-0.545662	13	12.34	0						rs140366348;rs17720293;rs17737028;rs117453392;rs9467788;rs9368503;rs74328437;rs2008668	1
2	ENSG00000238648	TRNAI6	6	27599188	27599311	1	miRNA		TRNAI6			1	6.48	0						rs142970147	1
2	ENSG00000216676	RP1-15D7.1	6	27620381	27620604	-1	pseudogene					1	6.587	0						rs142970147	1
2	ENSG00000203813	HIST1H3H	6	27777842	27778314	1	protein_coding	8968	HIST1H3H	0.0249392	-0.177817	1	22	0						rs17720293	1
2	ENSG00000233822	HIST1H2BN	6	27806323	27823487	1	protein_coding	8341	HIST1H2BN	0.139775	0.145508	8	5.426	0					1.46e-10	rs17720293;rs17737028;6:28325571;rs149878;rs144209406	1
2	ENSG00000184357	HIST1H1B	6	27834570	27835359	-1	protein_coding	3009	HIST1H1B	0.509139	-0.0898951	1	12.12	0						rs9368537	1
2	ENSG00000197153	HIST1H3J	6	27858093	27860884	-1	protein_coding	8968	HIST1H3J	0.695884	-0.189708	3	21.5	0						rs9368537;rs149878	1
2	ENSG00000168131	OR2B2	6	27878963	27880174	-1	protein_coding	81697	OR2B2	6.8672e-05	-0.212076	1	22.8	0					9.857e-37	rs9368537	1
2	ENSG00000124657	OR2B6	6	27925019	27925960	1	protein_coding	26212	OR2B6	0.0407309	-0.0981731	2	11.19	0						rs9368537	1
2	ENSG00000216629	OR2W4P	6	27944928	27945853	1	pseudogene		OR2W4P			1	11.77	0						rs7739987	1
2	ENSG00000217539	IQCB2P	6	27978501	27980133	1	pseudogene		IQCB2P			2	13.78	0						rs7739987	1
2	ENSG00000217315	OR2W2P	6	28001725	28002633	1	pseudogene		OR2W2P			3	16.02	0						rs184084677;rs9368537	1
2	ENSG00000187763	OR2B7P	6	28014212	28015145	1	pseudogene		OR2B7P			3	15.46	0						rs9368537;rs184084677;rs169431	1
2	ENSG00000182477	OR2B8P	6	28021006	28021943	-1	pseudogene		OR2B8P			2	14.64	0					7.203e-89	rs17720293;rs17737028;rs169431	1
2	ENSG00000220721	OR1F12	6	28041094	28042011	1	pseudogene		OR1F12			3	18.45	0					2.862e-240	rs184084677;rs148208741;rs9468267	1
2	ENSG00000272009	RP1-313I6.12	6	28046570	28048908	-1	antisense					4	11.69	0					3.317e-244	rs169431;rs148672491;rs184084677	1
2	ENSG00000197279	ZNF165	6	28048753	28057341	1	protein_coding	7718	ZNF165	0.000563292	0.227981	2	3.475	0						rs184084677;rs7739987	1
2	ENSG00000219891	ZSCAN12P1	6	28058932	28061442	1	pseudogene	221584	ZSCAN12P1			2	6.088	112	2.49979e-07	0.000213091	GTEx/v8/Whole_Blood	+	1.158e-274	rs9468267;rs184084677;rs4434463;rs142970147;rs149878;rs169431;rs34024998;rs213232	1
2	ENSG00000219392	RP1-265C24.5	6	28083406	28084329	1	pseudogene					0	0	96	1.62157e-09	2.61906e-08	GTEx/v8/Cells_EBV-transformed_lymphocytes:GTEx/v8/Whole_Blood	-	1.158e-274	rs169431;rs139614182;rs140366348;rs149878;rs1150691;rs17720293;rs1884936;rs6939576;rs7745220	1
2	ENSG00000269293	ZSCAN16-AS1	6	28089573	28105071	-1	antisense	100129195	ZSCAN16-AS1			17	12.4	158	3.78121e-06	0.00310739	GTEx/v8/Whole_Blood	-	2.207e-244	rs169431;rs184084677;rs146663041;rs7739987;rs9468267;rs151327481;rs117453392;rs17720293;rs17737028;rs1884936;rs7745220	1
2	ENSG00000196812	ZSCAN16	6	28092338	28097860	1	protein_coding	80345	ZSCAN16	2.67303e-06	0.184187	7	12.4	0						rs169431;rs9468267;rs151327481;rs117453392;rs184084677;rs17720293;rs17737028	1
2	ENSG00000261839	RP1-265C24.8	6	28104627	28107456	1	lincRNA					1	3.928	0						rs184084677	1
2	ENSG00000198315	ZKSCAN8	6	28109688	28127250	1	protein_coding	7745	ZKSCAN8	0.000231595	-0.142528	14	16.11	0					3.776e-244	rs184084677;rs169431;rs9468267;rs139494877	1
2	ENSG00000226314	ZNF192P1	6	28129559	28137372	1	pseudogene	651302	ZNF192P1			4	13.34	137	2.38123e-08	0.000245334	GTEx/v8/Cells_EBV-transformed_lymphocytes:GTEx/v8/Whole_Blood	-	1.198e-240	rs184084677;rs7739987;rs17720293;rs9468267;rs12000;rs2235359;rs213232;rs74967533;rs1884936;rs2394152	1
2	ENSG00000216901	AL022393.7	6	28143966	28144452	1	pseudogene					0	0	227	4.53196e-10	1.19994e-06	GTEx/v8/Cells_EBV-transformed_lymphocytes	-	2.293e-306	rs149878;rs7739987;rs9468267;rs184084677;rs1150691;rs12000;rs2235359;rs34024998;rs213232;rs74967533;rs1884936;rs2394152	1
2	ENSG00000218016	ZNF192P2	6	28155828	28157210	1	pseudogene		ZNF192P2			2	9.378	0						rs7739987	1
2	ENSG00000176933	TOB2P1	6	28185421	28186655	-1	pseudogene	222699	TOB2P1			2	7.438	13	6.90656e-06	0.019718	GTEx/v8/Cells_EBV-transformed_lymphocytes			rs12000	1
2	ENSG00000137185	ZSCAN9	6	28192664	28201260	1	protein_coding	7746	ZSCAN9	4.10249e-08	0.461166	7	9.47	609	4.13691e-08	4.14105e-21	GTEx/v8/Whole_Blood	+	2.293e-306	rs148208741;rs74967533;rs146663041;rs34024998;rs2235359;rs2092114;rs1156086;rs149878;rs169431;rs1150691;rs12000;rs213232;rs1884936;rs2394152;rs876737;rs3828924;rs3117340;rs7754926;rs41316618	1
2	ENSG00000187626	ZKSCAN4	6	28212401	28227011	-1	protein_coding	387032	ZKSCAN4	6.74288e-05	0.661631	15	23.9	24	2.31205e-06	0.002225	GTEx/v8/Whole_Blood	-	1.157e-90	rs17720293;rs2235359;rs12000;rs74967533;rs34077080;rs190461360;rs146663041;rs149204020;rs9368537;rs392230;rs1884936;rs7745220	1
2	ENSG00000189134	NKAPL	6	28227098	28228736	1	protein_coding	222698	NKAPL	0.000165621	0.0513426	2	11.8	41	0.000628289	0.00118655	GTEx/v8/Whole_Blood		1.639e-127	rs12000;rs34024998	1
2	ENSG00000197062	RP5-874C20.3	6	28234788	28245974	1	pseudogene					13	16.27	245	7.00964e-10	3.23912e-06	GTEx/v8/Whole_Blood	-	1.392e-297	rs146663041;rs74967533;rs2235359;rs12000;rs213232;rs140366348;rs149878;rs9368537;rs169431;rs1150691;rs34024998;rs17720293;rs1884936;rs2394152;rs1233595	1
2	ENSG00000137338	PGBD1	6	28249314	28270326	1	protein_coding	84547	PGBD1	1.46735e-05	-0.0800605	39	13	0					4.384e-08	rs113710928;rs213232;rs146663041;rs74967533;rs2235359;rs141712291;rs151327481;rs117453392;rs34077080;rs148672491	1
2	ENSG00000235109	ZSCAN31	6	28292470	28324048	-1	protein_coding	64288	ZSCAN31	3.77127e-09	1.10713	66	12.96	0					4.448e-121	rs146663041;rs213232;rs34077080;rs74967533;rs12000;rs2235359;rs139614182;rs139494877;rs190461360;rs17720293;rs113710928	1
2	ENSG00000189298	ZKSCAN3	6	28317691	28336947	1	protein_coding	80317	ZKSCAN3	0.000122608	-0.652443	29	10.77	9	0.00043297	0.00669039	GTEx/v8/Whole_Blood		1.93e-154	rs17720293;rs12000;rs2235359;rs146663041;rs213232;6:28325571;rs139614182;rs113710928;rs34024998;rs148672491;rs74967533;rs140366348;rs9368537;rs1884936	1
2	ENSG00000158691	ZSCAN12	6	28346732	28367511	-1	protein_coding	9753	ZSCAN12	1.43992e-05		28	14.91	0					7.559e-166	rs34024998;rs213232;rs146663041;rs148208741;rs141712291;rs139614182;rs74967533	1
2	ENSG00000187987	ZSCAN23	6	28399707	28411279	-1	protein_coding	222696	ZSCAN23	0.00270295	0.0706565	11	12.36	157	5.25709e-17	3.17711e-11	GTEx/v8/Cells_EBV-transformed_lymphocytes	-	1.392e-297	rs213232;rs34024998;rs146663041;rs34077080;rs149878;rs1150691;rs17720293;rs392230;rs1884936	1
2	ENSG00000198704	GPX6	6	28471073	28495992	-1	protein_coding	257202	GPX6	3.13758e-05	0.718703	53	10.59	0					1.156e-167	rs392230;rs146663041;rs72845876;rs17720293;rs183719819;6:28713434;rs148672491;rs34077080	1
2	ENSG00000224586	GPX5	6	28493702	28502729	1	protein_coding	2880	GPX5	0.00888468	0.354876	16	11.29	0					1.97e-20	rs392230;rs146663041;rs571726149	1
2	ENSG00000232040	SCAND3	6	28539407	28583989	-1	protein_coding	114821	SCAND3	9.70724e-09	-0.785031	62	12.31	0					2.605e-117	rs1884936;rs392230;rs17351888;rs17720293;rs146663041;rs139614182;rs139494877;rs34077080;rs148672491;rs141661096;rs141712291;rs73740747;rs79327542	1
2	ENSG00000246350	RP5-1186N24.3	6	28555155	28559524	1	processed_transcript					11	7.174	0					2.605e-117	rs146663041;rs1884936;rs73740747;rs17351888;rs17720293	1
2	ENSG00000271440	RP11-373N24.2	6	28601158	28601371	-1	pseudogene					1	4.233	0						rs1884936	1
2	ENSG00000235570	LINC00533	6	28616063	28616843	-1	lincRNA		LINC00533			2	8.237	0					8.02e-169	rs146663041;rs392230	1
2	ENSG00000237425	RPSAP2	6	28699794	28700681	1	pseudogene		RPSAP2			2	5.811	0						rs9257182	1
2	ENSG00000235559	NOL5BP	6	28751410	28751781	-1	pseudogene					1	7.325	0						rs2394152	1
2	ENSG00000225173	XXbac-BPG308K3.5	6	28805646	28806783	-1	lincRNA					3	7.475	0						rs2394152;rs876737;rs7745220	1
2	ENSG00000225595	XXbac-BPG308K3.6	6	28827402	28832407	-1	lincRNA	401242				6	9.484	0						rs7745220;rs3828924;rs876737;rs2394152	1
2	ENSG00000213916	RPL13P	6	28829193	28829824	1	pseudogene		RPL13P			2	9.484	0						rs7745220;rs3828924;rs876737	1
2	ENSG00000233366	ZNF90P2	6	28856609	28857683	-1	pseudogene		ZNF90P2			1	0.679	0						rs2394152	1
2	ENSG00000224157	HCG14	6	28864307	28865099	1	antisense	414760	HCG14			1	7.114	0						rs2394152	1
2	ENSG00000204713	TRIM27	6	28870779	28891766	-1	protein_coding	5987	TRIM27	0.878752	-0.142068	52	14.41	1411	1.32351e-55	2.45143e-43	GTEx/v8/Whole_Blood	-	2.293e-306	rs7745220;rs2394152;rs3828924;rs876737;rs4599679;rs41316602;rs117846312;rs12055619;6:28713434;rs148208741;rs139494877;rs146663041;rs34077080;rs149878;rs7739987;rs184084677;rs9468267;rs1150691;rs12000;rs2235359;rs34024998;rs213232;rs74967533;rs139614182;rs392230;rs1884936;rs73740747;rs6939576;rs9257182;rs41316618;rs1233595;rs7754926;rs3117340;rs9283885;rs17351888;rs17720293;rs7349908;rs3930883;rs1…	1
2	ENSG00000204709	C6orf100	6	28911654	28912314	1	protein_coding		C6orf100			4	32	22	4.99193e-05	0.0181715	GTEx/v8/Cells_EBV-transformed_lymphocytes			rs142445164;rs2394152;rs3828924;rs876737;rs7745220;rs213232	1
2	ENSG00000263426	RN7SL471P	6	28945252	28945547	1	misc_RNA		RN7SL471P			2	9.895	0						rs7754926;rs41316618;rs3117340	1
2	ENSG00000227214	HCG15	6	28953980	28955261	1	antisense		HCG15			1	4.244	0						rs3828924	1
2	ENSG00000244349	HCG16	6	28954577	28956313	1	antisense	101929874	HCG16			2	4.244	0						rs3828924;rs2394152	1
2	ENSG00000197935	ZNF311	6	28962562	28973093	-1	protein_coding	282890	ZNF311	0.000129446	0.377858	18	10.88	0						rs2394152;rs7745220;rs3117340;rs3828924;rs7754926;rs41316618;rs9283885	1
2	ENSG00000223677	OR2AD1P	6	28994457	28995384	-1	pseudogene		OR2AD1P			3	15.34	0					3.584e-228	rs9283885;rs4599679;rs3117340;rs3828924	1
2	ENSG00000204704	OR2W1	6	29011990	29013017	-1	protein_coding	26692	OR2W1	0.0865619	0.531528	2	25.2	0						rs3117340;rs3828924	1
2	ENSG00000236909	OR2P1P	6	29039601	29040376	-1	pseudogene		OR2P1P			4	13.48	0						rs3117340;rs3828924;rs2394152;rs7745220	1
2	ENSG00000204703	OR2B3	6	29053985	29055090	-1	protein_coding	442184	OR2B3	0.00133693	0.45884	1	1.786	0						rs7754926;rs41316618	1
2	ENSG00000204702	OR2J1	6	29068386	29069658	1	protein_coding		OR2J1	0.0174945		7	36	0					1.103e-278	rs7754926;rs41316618;rs3117340;rs3828924;rs2394152;rs151327481;rs139791445	1
2	ENSG00000204701	OR2J3	6	29079668	29080603	1	protein_coding	442186	OR2J3	0.0281435	0.112859	4	14	0						rs7745220;rs9283885;rs3117340;rs3828924	1
2	ENSG00000227206	XXbac-BCX196D17.5	6	29091987	29096685	1	lincRNA					14	4.472	0						rs7754926;rs41316618;rs2394152;rs7745220;rs142242329;rs3117340;rs3828924;rs9283885	1
2	ENSG00000203492	OR2N1P	6	29105657	29106593	-1	pseudogene		OR2N1P			1	8.856	0						rs7754926;rs41316618	1
2	ENSG00000204700	OR2J2	6	29141311	29142351	1	protein_coding	26707	OR2J2	0.0107267	0.271259	6	23.1	0					9.27e-223	rs2394152;rs3117340;rs3828924;rs4599679	1
2	ENSG00000224233	OR2J4P	6	29149287	29150222	1	pseudogene		OR2J4P			6	9.398	0						rs3117340;rs3828924;rs2394152;rs151001546;rs139494877	1
2	ENSG00000230598	OR2H4P	6	29183013	29183956	1	pseudogene		OR2H4P			1	12.94	0						rs3117340;rs3828924	1
2	ENSG00000232505	XXbac-BPG308J9.3	6	29191750	29258217	1	lincRNA	101929006				155	11.62	0					3.507e-223	rs2394152;rs7754926;rs41316618;rs3117340;rs3828924;rs139791445;rs146185592;rs74294678;rs146663041;rs190461360;rs4599679;rs142242329;rs7745220;rs146609822;rs151001546;rs139494877;6:29229480;rs151327481;rs79327542;rs34077080	1
2	ENSG00000204697	OR2U1P	6	29230480	29231856	-1	pseudogene		OR2U1P			3	11.02	0						rs7754926;rs41316618;rs3117340;rs3828924	1
2	ENSG00000242524	OR2U2P	6	29236239	29237198	-1	pseudogene		OR2U2P			2	11.54	0						rs7754926;rs41316618;rs7745220	1
2	ENSG00000230056	DDX6P1	6	29297403	29298838	-1	pseudogene		DDX6P1			2	10.8	0						rs7745220	1
2	ENSG00000243729	OR5V1	6	29323007	29399744	-1	protein_coding	81696	OR5V1	0.00344262	0.323635	101	13.64	0					5.663e-294	rs142242329;rs7745220;rs148472353;rs7349908;rs3930883;6:29602881;rs7754926;6:28713434;rs148208741;rs190461360;rs74294678;rs146663041;rs1419639;rs9468541;rs16894836;rs77454196;rs116973845;rs16894983;rs17351888;rs3128851;rs117680413;rs139791445;rs151001546;rs59818916;rs117137251;rs141025794	1
2	ENSG00000112462	OR12D3	6	29341200	29343068	-1	protein_coding	81797	OR12D3	1.34136e-05	0.883549	4	12.7	0						rs7349908;rs7754926	1
2	ENSG00000168787	OR12D2	6	29364416	29365448	1	protein_coding	26529	OR12D2	0.601033	0.457835	1	13.64	0						rs7349908	1
2	ENSG00000251608	OR12D1	6	29385057	29386003	1	polymorphic_pseudogene		OR12D1			1	5.39	0						rs3128851	1
2	ENSG00000204694	OR11A1	6	29393281	29424848	-1	protein_coding	26531	OR11A1	0.0434844	1.23026	27	13.02	0					5.663e-294	rs16894983;rs74294678;rs146663041;rs3128851;rs77454196;rs7349908;6:28713434;rs117137251;rs141025794;rs16894836	1
2	ENSG00000204688	OR2H1	6	29424958	29432105	1	protein_coding	26716	OR2H1	0.0449041	-0.358288	7	5.444	0					9.99e-18	rs74294678;rs146663041;rs59818916;rs16894836	1
2	ENSG00000225797	UBDP1	6	29432373	29437583	-1	pseudogene		UBDP1			6	11.35	0					5.128e-62	rs74294678;rs146663041;rs16894836;rs116973845	1
2	ENSG00000230164	MAS1LP1	6	29442802	29443848	-1	pseudogene		MAS1LP1			1	2.55	0					5.201e-24	rs77454196	1
2	ENSG00000204687	MAS1L	6	29454474	29455738	-1	protein_coding	116511	MAS1L	0.000466206	0.689548	1	0.252	0						rs74294678;rs146663041	1
2	ENSG00000229274	XXbac-BPG13B8.10	6	29465286	29478333	1	lincRNA					18	6.984	0					8.439e-179	rs16894836;rs9468541;rs59818916;rs16894983;rs150971595;rs34077080;rs74294678;rs146663041	1
2	ENSG00000224582	LINC01015	6	29497197	29501345	1	antisense	100507362	LINC01015			5	4.493	0					3.3e-102	rs139791445;rs74294678;rs17351888	1
2	ENSG00000229281	GPR53P	6	29505481	29506564	-1	pseudogene		GPR53P			2	10.51	0					2.113e-07	rs142242329;6:28713434	1
2	ENSG00000237988	OR2I1P	6	29520996	29521943	1	pseudogene		OR2I1P			1	12.72	0						rs74294678	1
2	ENSG00000213886	UBD	6	29523292	29527702	-1	protein_coding	10537	UBD	0.0798958	0.401531	1	4.724	0						rs74294678	1
2	ENSG00000204681	GABBR1	6	29523406	29601753	-1	protein_coding	2550	GABBR1	0.99997	0.238892	144	20.1	2	2.46254e-06	1.26359e-08	GTEx/v8/Whole_Blood	-	1.081e-231	rs74294678;rs362529;rs1003582;rs29263;rs362525;rs10946999;rs117181567;rs146185592;rs17351888;rs138059097;rs41317798;6:29602881;rs150971595;rs9468541;rs3095268	1
2	ENSG00000232173	OR2H5P	6	29541686	29542613	1	pseudogene		OR2H5P			1	10.69	0						rs29263	1
2	ENSG00000204657	OR2H2	6	29555683	29556745	1	protein_coding	7932	OR2H2	0.0899459	0.696836	3	17.83	6	0.000297525	0.019501	GTEx/v8/Whole_Blood			rs10946999;rs1003582;rs138059097;rs1884936	1
2	ENSG00000112473	SLC39A7	6	33168222	33172216	1	protein_coding	7922	SLC39A7	0.0149908	-0.946036	1	12.16	0						rs184714444	2
2	ENSG00000232940	HCG25	6	33217311	33222766	1	antisense	414765	HCG25			5	14.77	0					2.525e-14	rs460568;6:33222194	2
2	ENSG00000223501	VPS52	6	33218049	33239824	-1	protein_coding	6293	VPS52	0.0159633	0.463747	10	14.77	0					2.525e-14	rs460568;6:33222194;rs141400340	2
2	ENSG00000231500	RPS18	6	33239787	33244287	1	protein_coding	6222	RPS18	0.962013	-0.158263	5	16.46	82	1.58639e-61	4.56281e-63	GTEx/v8/Cells_EBV-transformed_lymphocytes:GTEx/v8/Whole_Blood	+	1.764e-87	rs460568;rs9277947;rs67136908;rs184714444;rs538693715;rs114993678;rs210159;rs9461875;rs210199;rs9348925;rs140007014;rs78531919	2
2	ENSG00000235863	B3GALT4	6	33244917	33252609	1	protein_coding	8705	B3GALT4	0.236709		3	0.932	0						rs460568;rs28795133;rs9277988	2
[truncated: 1,078 more rows]

## Sheet: S Table 7
Supplementary Table 7. Significant relationships found using mapped genes for gene set enrichment analysis
[truncated: 1,617 more rows]

[truncated: 5 more sheets: S Table 8, S Fig. 4, S Table 9, S Table 10, S Fig. 5]
